# Supplementary material
Source: publisher figshare collection journal article supplement (https://gsapubs.figshare.com/ndownloader/files/36482940)
Supplement: Supplementary file 1 [file 36482940]

## Sheet: Hren&Sh <20 N LAT
Locality	Lat.	Long.	Surface elevation (m)	Lake Surface Area (km2)	Mean depth (m)	Max. Depth (m)	Water surface T - Jan	Water surface T - Feb	Water surface T -Mar	Water surface T -April	Water surface T -May	Water surface T -Jun	Water surface T -July	Water surface T -Aug	Water surface T -Sept	Water surface T -Oct	Water surface T -Nov	Water surface T -Dec	MAWT (˚C)	AMJJASO WT (˚C)	JJA MAWT (˚C)	Air T - Jan	Air T - Feb	Air T - Mar	Air T - April	Air T - May	Air T - Jun	Air T - July	Air T - Aug	Air T - Sept	Air T - Oct	Air T - Nov	Air T - Dec	MAAT (˚C)	AMJJASO AT (˚C)	JJA AT (˚C)	Water T˚C Ref.	Air T˚C Ref.		slope, m	#VALUE!	#VALUE!	intercept, b
Lake Ihotry, Madagascar	-21.949	43.648	50	100	2	4	30	30.5	30	28	25	21	21	25	27	28	29.2	30	27.1	25	22.3333	27.5	27.4	27	25.5	23.1	21.2	20.9	21.5	22.8	24.4	25.7	26.8	24.5	22.7714	21.2	1	a		std dev of slope	#VALUE!	#VALUE!	std dev of intercept
Lake Tinaroo, Queensland, AUS	-17.167	145.583	670	35	-	42	27	27.3	26.5	25.2	23.7	21.4	20.5	20.6	22.2	25.3	27	26.4	24.4	22.7	20.8333	23	23.8	22.7	22	20	16.5	17.5	18	19.3	22.1	23.2	23.9	21	19.3429	17.3333	2	I		R2=SSr/SSt	#VALUE!	#VALUE!	sy,x, std dev of y
Kariba Lake, Zambia	-16.529	28.761	484	5200	17	120	28	28	28	27.6	27.4	25.5	24	23	25.3	26	25	28	26.3	25.5429	24.1667	26.8	27.3	27	27.5	23.9	22.6	20.6	23.2	26.2	30.5	30	27.2	26.1	24.9286	22.1333	3	b		Fisher F statistic, SSr(n-2)/Sse	#VALUE!	#VALUE!	degrees of freedom, n-2
Lake Malawi	-14.159	35.047	500	29600	292	706	28.5	28.3	28.1	27.5	26.8	26	24.2	23.5	24.3	26.6	27.2	28.5	26.6	25.5571	24.5667	23.7	24	23.5	22.9	21	19.3	20.1	22	24.3	25	24.5	22.5	22.7	22.0857	20.4667	4	I		regression ss (SSr); explained variation	#VALUE!	#VALUE!	errors ss (SSe); unexplained variation
Lake Mweru	-8.909	28.764	917	5120	8	27	27.2	27.2	27.2	27.2	26.2	22.5	22	22.1	25.1	26.8	26.5	26.4	25.5	24.5571	22.2	23.6	23.8	24	24.1	23.2	21.5	21.4	23.1	25.3	25.5	24.2	23.6	23.6	23.4429	22	3	c
Lake Tanganyika (Mwela - south end)	-8.589	31.057	773	32900	570	1470	27	26.8	26.8	26.9	25.1	24.8	24	23.9	24.7	25.3	26.8	27	25.8	24.9571	24.2333	23.1	23.3	23.6	23.4	23.2	21.7	21.3	22.5	23.9	24.5	23.4	23	23.1	22.9286	21.8333	4	I
Lake Tanganyika (Uvira - north end)	-3.396	29.136	773	32900	570	1470	25.8	26.2	26.7	26.8	26.2	25.5	25.4	25.6	25.6	25.8	25.7	25.9	25.9	25.8429	25.5	23.8	24	24	23.8	24	23.3	23.1	24.2	25.1	25	23.8	23.6	24	24.0714	23.5333	4	I
Kivu Lake	-2.508	28.881	1460	2700	240	480	24.4	23.8	23.5	23.8	23.5	23.5	23	23	23.5	24.5	25	25	23.9	23.5429	23.1667	19.8	19.8	19.8	19.1	19.4	19.8	19.3	20	19.7	19.8	18.9	19	19.5	19.5857	19.7	3	d
Lake Victoria, Kenya	0.102	32.606	1133	68800	40	83	25.5	26.3	26.3	25.8	25.4	25.3	24.7	24.8	24.7	24.9	25.4	25.7	25.4	25.0857	24.9333	22.6	22.8	22.9	22.5	22.2	21.8	21.3	21.6	22.1	22.7	22.7	22.4	22.3	22.0286	21.5667	5	e
Lake Albert, Uganda	1.452	30.492	615	5300	25	58	28.5	28.5	29	29	29	28.7	28	28	28	27.7	28.5	29	28.5	28.3429	28.2333	24	24.5	24.5	23.5	23	22	22	22	22.5	23	23	23	23	22.5714	22	3	e
Ebrié Lagoon, Cote D'Ivoire	5.261	-4.565	0	200	5	5	29.4	30	31.2	31.3	30.7	28.8	27.2	27.2	27.8	29	30.2	30	29.4	28.8571	27.7333	26.6	27.5	27.7	27.7	27.1	25.9	25	24.5	25	26.1	26.9	26.5	26.4	25.9	25.1333	3	e
Lake Lanao	8	123.832	702	357	60	112	24.7	24.8	24.5	26.6	25.5	25.5	25.3	25.2	25.5	25.5	25.5	25.2	25.3	25.5857	25.3333	21.5	22	22.3	23.1	23.8	23.7	23.2	23.4	23.4	23.2	22.8	22.2	19	23.4	23.4333	6	6
Lake Pawlo, Ethiopia, part of Bishoftu lakes	8.802	39.084	1800	1	-	100	20.5	20.2	22.5	22.7	23.5	23	22.5	23.2	25	23	22.5	21	22.5	23.2714	22.9	17.1	18.3	19.6	19.7	19.9	19.1	18.2	17.8	18	17.6	16.7	16.4	18.2	18.6143	18.3667	1	e
Lake Valencia, Venezuela	10.203	-67.738	410	350	18	39	25.8	25.8	25.9	26.5	27	27.3	28	28.1	28.2	28	28	27	27.1	27.5857	27.8	24.8	25.6	26.6	27.5	28.5	25.2	25.5	25.5	25.7	25.7	25.9	24.5	25.9	26.2286	25.4	7	I
Lake Tana	12	37.25	1840	3000	-	15	20.5	20.7	22	22.4	24	22.7	22.1	20.6	20.5	22.1	22.4	20.5	21.7	22.0571	21.8	18.5	20	22.2	22.9	22.7	21.1	19.6	19.5	19.8	20.3	19.6	18.4	20.4	20.8429	20.0667	8	I
Lake Chad	14.266	13.139	244	10000	2	11	20.5	22	23	25.7	28.2	29	28	27.5	27.5	27	25	23	25.5	27.5571	28.1667	14	15.1	19.4	24.2	25.9	26.6	25.3	24.2	24.7	22.6	18.4	14.6	21.3	24.7857	25.3667	3	e
Lake Chilwa	15.5	35.596	622	1750	1	3	28.1	27	26.4	22.3	21.6	21.7	22	23.4	22.1	25.1	27.2	27.5	24.5	22.6	22.3667	22	22	21.7	19.5	16	14.8	14.4	15.3	18.1	21.9	21.9	22	19.1	17.1429	14.8333	9	I

## Sheet: T-ELEVATION GRADIENT MAAT
Station ID	Longitude (oE)	Latitude (oN)	Altitude(km)	Month	Air temperature (0.1 oC)	Ground surface temperature (0.1 oC)	Wind speed (0.1 m/s)	Anemometer hight (0.1m)	Period	RH(%)	calc MEAN Air temperature (oC)	calc MEAN Ground surface temperature ( oC)	calc MEAN RH(%)		Station ID	Longitude (oE)	Latitude (oN)	Altitude(km)		MEAN Air temperature (C)	MEAN Ground surface temperature (C)	MEAN RH(%)											USING "DATA ANALYSIS"
56004	92.26	34.13	4.5331	1	-16.1	-15.1	4.3	10.5	19812010	46	-3.75833	0.291667	53.0833		57126	107.33	33.13	0.4686	468.6	14.5167	17.8083	79.5																					SUMMARY OUTPUT
56004	92.26	34.13	4.5331	2	-13.2	-11	4.9	10.5	19812010	43					57128	107.2	33.1	0.4864	486.4	14.4083	17.2333	80											SUMMARY OUTPUT
56004	92.26	34.13	4.5331	3	-8.2	-4.6	5.3	10.5	19812010	40					57127	107.02	33.04	0.5095	509.5	14.6667	16.8167	79.1667																					Regression Statistics
56004	92.26	34.13	4.5331	4	-3.6	1.8	4.7	10.5	19812010	44					57027	107.44	34.16	0.5176	517.6	12.8083	15.6583	73.9167											Regression Statistics										Multiple R	0.943856
56004	92.26	34.13	4.5331	5	1.4	8.1	4.3	10.5	19812010	54					57213	106.56	33	0.5365	536.5	14.35	17.225	81.25											Multiple R	0.943856									R Square	0.890864
56004	92.26	34.13	4.5331	6	5.4	11.8	3.8	10.5	19812010	64					57119	106.42	33.1	0.5481	548.1	14.425	17.0667	77.4167											R Square	0.890864									Adjusted R Square	0.89031
56004	92.26	34.13	4.5331	7	8	14	3.4	10.5	19812010	66					57020	107.24	34.22	0.563	563	13.075	15.0583	70.25											Adjusted R Square	0.89031									Standard Error	314.999
56004	92.26	34.13	4.5331	8	7.5	13.2	3.2	10.5	19812010	65					57026	107.53	34.22	0.5859	585.9	12.775	15.1	72.5833											Standard Error	0.314999									Observations	199
56004	92.26	34.13	4.5331	9	4	8.7	3.1	10.5	19812010	68					57016	107.08	34.21	0.6124	612.4	13.5333	15.025	65.75											Observations	199
56004	92.26	34.13	4.5331	10	-3.4	0.3	3.3	10.5	19812010	56					57024	107.39	34.27	0.6696	669.6	12.2083	14.7333	71.0833																					ANOVA
56004	92.26	34.13	4.5331	11	-11.4	-9.1	3.5	10.5	19812010	46					57021	107.08	34.39	0.7516	751.6	12.0083	14.7083	69.6667											ANOVA											df	SS	MS	F	Significance F
56004	92.26	34.13	4.5331	12	-15.5	-14.6	3.7	10.5	19812010	45					57025	107.23	34.31	0.7811	781.1	11.7917	14.15	69.9167												df	SS	MS	F	Significance F					Regression	1	1.59561e+08	1.59561e+08	1608.08	1.04468e-96
52908	93.05	35.13	4.6122	1	-16.2	-14.2	5.3	10.5	19812010	50	-5.05	-0.775	56.25		57106	106.09	33.19	0.7942	794.2	13.6	15.925	72											Regression	1	159.561	159.561	1608.08	1.04468e-96					Residual	197	1.95472e+07	99224.4
52908	93.05	35.13	4.6122	2	-14.2	-11.2	5.5	10.5	19812010	47					57134	107.59	33.31	0.8272	827.2	11.6583	14.325	70.9167											Residual	197	19.5472	0.0992244							Total	198	1.79108e+08
52908	93.05	35.13	4.6122	3	-9.9	-5.7	5.3	10.5	19812010	45					57003	106.5	34.54	0.9242	924.2	11.0667	13.8	70.3333											Total	198	179.108
52908	93.05	35.13	4.6122	4	-5.3	0.4	4.5	10.5	19812010	48					57110	106.05	33.47	0.9308	930.8	12.0667	15.125	74.6667																						Coefficients	Standard Error	t Stat	P-value	Lower 95%	Upper 95%
52908	93.05	35.13	4.6122	5	-0.4	6	4.1	10.5	19812010	58					52267	101.04	41.57	0.9405	940.5	9.39167	12.8417	33.5833												Coefficients	Standard Error	t Stat	P-value	Lower 95%	Upper 95%	Lower 95.0%	Upper 95.0%		Intercept	3421.11	44.2354	77.3386	2.32116e-149	3333.87	3508.34
52908	93.05	35.13	4.6122	6	3.2	9.3	3.9	10.5	19812010	68					52378	102.22	41.22	0.96	960	9.7	12.1917	31.1667											Intercept	3.42111	0.0442354	77.3386	2.32116e-149	3.33387	3.50834	3.33387	3.50834		X Variable 1	-217.546	5.42497	-40.1009	1.04468e-96	-228.245	-206.848
52908	93.05	35.13	4.6122	7	6	11.6	3.5	10.5	19812010	69					57111	106.18	33.55	0.9614	961.4	12.0083	14.9333	71.5											X Variable 1	-0.217546	0.00542497	-40.1009	1.04468e-96	-0.228245	-0.206848	-0.228245	-0.206848
52908	93.05	35.13	4.6122	8	5.5	10.8	3.2	10.5	19812010	68					53924	107.37	35.04	0.9666	966.6	8.775	10.9083	67.25
52908	93.05	35.13	4.6122	9	1.9	6.5	3.2	10.5	19812010	70					53924	107.37	35.04	0.9666	966.6	10.425	13.7667	70.0833
52908	93.05	35.13	4.6122	10	-4.8	-0.7	3.3	10.5	19812010	59					57102	105.43	33.45	0.97	970	12.0083	14.7833	74.9167
52908	93.05	35.13	4.6122	11	-11.5	-8.8	4.1	10.5	19812010	46					53937	107.55	35.31	0.9794	979.4	9.025	11.2083	68.5
52908	93.05	35.13	4.6122	12	-14.9	-13.3	4.9	10.5	19812010	47					57113	106.32	33.54	0.9859	985.9	11.0583	13.1833	68.8333
52602	93.2	38.45	2.77	1	-12	-11.3	2.7	10.5	19812010	36	3.15	7.34167	29.8333		57113	106.32	33.54	0.9859	985.9	12.0583	14.3333	68.25
52602	93.2	38.45	2.77	2	-8	-5.9	3.4	10.5	19812010	29					53420	107.07	40.51	1.024	1024	7.90833	10.8	50.6667
52602	93.2	38.45	2.77	3	-2.2	1.6	4.2	10.5	19812010	27					57022	107.47	34.41	1.0263	1026.3	9.3	12.525	71.4167
52602	93.2	38.45	2.77	4	4.1	9.7	4.5	10.5	19812010	23					53926	107.21	35.21	1.0288	1028.8	9.975	12.5	71
52602	93.2	38.45	2.77	5	10.3	17.3	4.5	10.5	19812010	25					53926	107.21	35.21	1.0288	1028.8	10.55	13.275	68.5
52602	93.2	38.45	2.77	6	15.1	22.8	4.6	10.5	19812010	28					53502	105.45	39.47	1.0318	1031.8	9.425	12.2167	39.3333
52602	93.2	38.45	2.77	7	17.7	25.3	4.5	10.5	19812010	32					57124	106.56	33.38	1.0321	1032.1	11.5583	14.55	73.75
52602	93.2	38.45	2.77	8	16.3	22.9	4.3	10.5	19812010	30					53324	107.03	41.04	1.0353	1035.3	4.74167	7.3	42.3333
52602	93.2	38.45	2.77	9	10.8	15.5	3.9	10.5	19812010	29					53513	107.22	40.44	1.0411	1041.1	8.70833	11.1583	46.5
52602	93.2	38.45	2.77	10	2.4	5.4	3.4	10.5	19812010	29					53419	107	40.2	1.0553	1055.3	8.78333	11.2833	46.9167
52602	93.2	38.45	2.77	11	-5.6	-4.5	2.7	10.5	19812010	32					56096	104.55	33.24	1.0791	1079.1	14.9417	16.4417	57.5
52602	93.2	38.45	2.77	12	-11.1	-10.7	2.4	10.5	19812010	38					57014	105.52	34.34	1.0852	1085.2	11.2917	13.6083	68.75
52707	93.41	36.48	2.767	1	-10.7	-10.6	2.9	10.5	19812010	37	4.35833	8.04167	31.9167		53519	106.46	39.13	1.0925	1092.5	9.29167	12.1583	48.75
52707	93.41	36.48	2.767	2	-6.2	-5	3.2	10.5	19812010	27					53829	107.54	35.59	1.0937	1093.7	9.94167	12.45	63.4167
52707	93.41	36.48	2.767	3	0	3	3.5	10.5	19812010	28					53611	106.33	38.53	1.0987	1098.7	9.41667	12.3167	53.6667
52707	93.41	36.48	2.767	4	6.1	10.8	4.1	10.5	19812010	26					53615	106.42	38.48	1.1016	1101.6	9.01667	11.3167	51.75
52707	93.41	36.48	2.767	5	11.7	18.1	4.5	10.5	19812010	27					53512	106.48	39.48	1.1056	1105.6	10.1	12.175	41.4167
52707	93.41	36.48	2.767	6	15.8	23.4	4.4	10.5	19812010	32					53610	106.21	38.34	1.1062	1106.2	9.45	12.3667	54.8333
52707	93.41	36.48	2.767	7	17.9	25.8	4.2	10.5	19812010	37					53614	106.12	38.28	1.1109	1110.9	9.525	12.1667	55.25
52707	93.41	36.48	2.767	8	16.6	23.4	3.9	10.5	19812010	35					53618	106.15	38.17	1.1137	1113.7	9.6	12.7333	55.6667
52707	93.41	36.48	2.767	9	11.7	16.4	3.6	10.5	19812010	33					53619	106.18	38.07	1.1159	1115.9	9.21667	12.075	56.5833
52707	93.41	36.48	2.767	10	3.6	5.8	3.2	10.5	19812010	31					53518	106.21	39.02	1.1177	1117.7	10.1	12.9917	47.8333
52707	93.41	36.48	2.767	11	-4.3	-4.3	2.9	10.5	19812010	33					53617	106.05	38.02	1.118	1118	9.775	12.4333	53.0833
52707	93.41	36.48	2.767	12	-9.9	-10.3	2.7	10.5	19812010	37					53612	106.11	37.59	1.1288	1128.8	9.96667	13.0833	53.25
52313	94.4	41.32	1.5738	1	-11.5	-10.9	3.7	10.5	19812002	56	6.48333	9.53333	36		52418	94.41	40.09	1.139	1139	9.91667	13.3	43
52313	94.4	41.32	1.5738	2	-6.8	-5.3	4.3	10.5	19812002	42					57006	105.45	34.35	1.1416	1141.6	11.4417	13.5	65.5
52313	94.4	41.32	1.5738	3	0.2	3	4.9	10.5	19812002	31					53928	107.01	35.18	1.1491	1149.1	10.2833	12.8833	64.5
52313	94.4	41.32	1.5738	4	8.1	12.2	5.3	10.5	19812002	25					52424	95.47	40.32	1.1709	1170.9	9.2	11.9583	41.1667
52313	94.4	41.32	1.5738	5	15.3	20.8	5.5	10.5	19812002	23					53925	107.11	35.41	1.1725	1172.5	10.0167	12.4	64.0833
52313	94.4	41.32	1.5738	6	20.5	26.2	5.2	10.5	19812002	28					52446	99.31	40.18	1.1774	1177.4	8.75	11.4917	44.6667
52313	94.4	41.32	1.5738	7	22.8	28.1	5.1	10.5	19812002	32					53522	107.5	40.03	1.1803	1180.3	8.00833	11.2833	43.1667
52313	94.4	41.32	1.5738	8	21.1	25.7	4.9	10.5	19812002	31					53705	105.41	37.29	1.1834	1183.4	9.90833	12.675	52.4167
52313	94.4	41.32	1.5738	9	15.2	18.7	4.8	10.5	19812002	28					53929	107.48	35.12	1.2065	1206.5	9.375	11.65	69.0833
52313	94.4	41.32	1.5738	10	6.1	8.2	4.3	10.5	19812002	35					57002	105.39	34.51	1.2161	1216.1	10.9	13.1083	66.4167
52313	94.4	41.32	1.5738	11	-3.2	-2.6	3.8	10.5	19812002	45					57105	105.36	33.2	1.2212	1221.2	11.025	13.275	76.0833
52313	94.4	41.32	1.5738	12	-10	-9.7	3.5	10.5	19812002	56					53704	105.11	37.32	1.2257	1225.7	9.20833	11.8167	55.4167
52418	94.41	40.09	1.139	1	-7.9	-8	1.8	10.5	19812010	53	9.91667	13.3	43		52575	102.47	39.25	1.2395	1239.5	9.55833	13.675	37.1667
52418	94.41	40.09	1.139	2	-2.6	-2	2	10.5	19812010	39					52607	106.39	39.26	1.2526	1252.6	8.64167	11.9833	44.4167
52418	94.41	40.09	1.139	3	5	7	2.3	10.5	19812010	35					53821	107.18	36.34	1.2556	1255.6	9.21667	11.3917	58.5
52418	94.41	40.09	1.139	4	12.9	16.7	2.5	10.5	19812010	29					52447	98.53	40	1.2705	1270.5	8.75	11.675	44.6667
52418	94.41	40.09	1.139	5	19.1	25.1	2.2	10.5	19812010	33					53930	107.59	36.27	1.271	1271	8.66667	11.5167	62.4167
52418	94.41	40.09	1.139	6	23.4	31	1.8	10.5	19812010	39					57001	105.2	34.45	1.2719	1271.9	10.675	13.5083	68.3333
52418	94.41	40.09	1.139	7	25.2	32.6	1.8	10.5	19812010	44					52495	104.48	40.1	1.3239	1323.9	7.4	10.125	35.3333
52418	94.41	40.09	1.139	8	23.3	29.8	1.6	10.5	19812010	45					52495	104.48	40.1	1.3239	1323.9	7.875	10.7167	39.8333
52418	94.41	40.09	1.139	9	17.3	21.9	1.5	10.5	19812010	46					52546	99.5	39.22	1.3322	1332.2	8.09167	11.2667	54
52418	94.41	40.09	1.139	10	8.9	11.3	1.4	10.5	19812010	46					53730	107.29	38.11	1.3333	1333.3	7.91667	10.7917	49.9167
52418	94.41	40.09	1.139	11	0.8	1	1.6	10.5	19812010	51					53810	105.54	36.58	1.3393	1339.3	9.50833	12.3333	51.9167
52418	94.41	40.09	1.139	12	-6.4	-6.8	1.7	10.5	19812010	56					53915	106.4	35.33	1.3466	1346.6	9.275	11.5583	63.5
52515	94.52	39.31	2.1372	9	14.3	17.5	2.6	10.6	19812010	34	7.24167	9.94167	34.0833		53723	107.23	37.48	1.3493	1349.3	8.56667	10.975	49.8333
52515	94.52	39.31	2.1372	10	7.1	8.2	2.7	10.6	19812010	33					53725	107.35	37.35	1.3603	1360.3	8.76667	11.0667	50.8333
52515	94.52	39.31	2.1372	11	0.4	-0.2	3.1	10.6	19812010	34					52681	103.05	38.38	1.3675	1367.5	8.825	11.7167	44.25
52515	94.52	39.31	2.1372	12	-4.9	-6.3	3.3	10.6	19812010	37					57011	106.09	34.45	1.3782	1378.2	9.16667	12.0083	71.5
52515	94.52	39.31	2.1372	1	-6.7	-7.5	2.9	10.6	19812010	38					53529	107.59	39.06	1.3803	1380.3	7.54167	10.0667	46.3333
52515	94.52	39.31	2.1372	2	-3.9	-3.4	2.7	10.6	19812010	33					53505	105.24	37.53	1.3807	1380.7	8.375	12.1333	40.6667
52515	94.52	39.31	2.1372	3	1.7	3.9	2.7	10.6	19812010	32					53881	106.29	37.17	1.3822	1382.2	9.35833	11.8417	47.4167
52515	94.52	39.31	2.1372	4	8.3	12.7	3.1	10.6	19812010	27					52895	104.41	36.34	1.3982	1398.2	9.425	12.3417	58.25
52515	94.52	39.31	2.1372	5	13.9	20	3.1	10.6	19812010	29					56094	104.22	33.47	1.4	1400	13.425	15.9167	59.8333
52515	94.52	39.31	2.1372	6	18	24.6	2.8	10.6	19812010	34					57007	105.11	34.11	1.4046	1404.6	10.2583	13.0667	70.5833
52515	94.52	39.31	2.1372	7	19.8	25.8	2.6	10.6	19812010	41					56097	104.14	33.16	1.4068	1406.8	13.0583	15.1083	64.3333
52515	94.52	39.31	2.1372	8	18.9	24	2.6	10.6	19812010	37					53923	107.38	35.44	1.421	1421	9.2	11.05	61.75
52818	94.54	36.25	2.8076	1	-8.4	-8.8	1.8	10.5	19812010	38	5.75833	8.65833	32.0833		52557	100.1	39.09	1.4537	1453.7	8.25833	12.2583	48.6667
52818	94.54	36.25	2.8076	2	-4.2	-3.6	2.2	10.5	19812010	29					53517	106.2	39.16	1.4645	1464.5	8.49167	11.0833	42.8333
52818	94.54	36.25	2.8076	3	1.2	3.3	2.5	10.5	19812010	27					52533	98.29	39.46	1.4772	1477.2	7.79167	10.2833	47.75
52818	94.54	36.25	2.8076	4	7.1	10.9	3	10.5	19812010	24					53927	106.37	35.12	1.4776	1477.6	7.83333	10.6833	71.5833
52818	94.54	36.25	2.8076	5	12.3	18.2	3.1	10.5	19812010	28					52652	100.26	38.56	1.4827	1482.7	7.78333	11.6917	51.5833
52818	94.54	36.25	2.8076	6	16.2	23	3	10.5	19812010	33					57004	104.53	34.44	1.4954	1495.4	9.925	12.4417	65.9167
52818	94.54	36.25	2.8076	7	18.5	25.3	2.8	10.5	19812010	37					53231	106.24	41.24	1.5096	1509.6	5.55	8.36667	41
52818	94.54	36.25	2.8076	8	17.5	23.2	2.6	10.5	19812010	34					52576	101.41	39.13	1.5101	1510.1	9.15833	12.1167	35.9167
52818	94.54	36.25	2.8076	9	12.8	16.6	2.3	10.5	19812010	34					52889	103.53	36.03	1.5172	1517.2	10.3833	12.425	53.4167
52818	94.54	36.25	2.8076	10	5.4	6.9	2	10.5	19812010	31					52436	97.02	40.16	1.526	1526	7.5	9.9	42.3333
52818	94.54	36.25	2.8076	11	-2	-2.8	1.8	10.5	19812010	32					52679	102.4	37.55	1.5315	1531.5	8.53333	12.1917	51.25
52818	94.54	36.25	2.8076	12	-7.3	-8.3	1.7	10.5	19812010	38					57028	107.19	34.02	1.5436	1543.6	8.14167	10.5667	69.75
52815	95.18	36.48	2.6789	9	13.3	17.6	4.3	0	19811996	26	5.525	9.525	27.5833		53602	105.4	38.5	1.5614	1561.4	8.69167	10.4917	39
52815	95.18	36.48	2.6789	10	5.3	8.4	3.6	0	19811996	26					52313	94.4	41.32	1.5738	1573.8	6.48333	9.53333	36
52815	95.18	36.48	2.6789	11	-2.9	-0.9	3	0	19811996	29					57008	105.18	34.02	1.579	1579	9.14167	11.8083	72.75
52815	95.18	36.48	2.6789	12	-8.4	-6.9	3	0	19811996	33					52797	104.03	37.11	1.6309	1630.9	9.05833	11.7667	47.5
52815	95.18	36.48	2.6789	1	-9.8	-8.2	3.1	0	19811996	33					53917	106.04	35.13	1.631	1631	8.36667	10.9583	66.75
52815	95.18	36.48	2.6789	2	-5.5	-3.2	3.5	0	19811996	25					52980	103.18	35.58	1.648	1648	9.68333	12.5	58.5833
52815	95.18	36.48	2.6789	3	0.6	4.1	4.2	0	19811996	23					53906	105.43	35.31	1.6581	1658.1	7.80833	10.525	65.5833
52815	95.18	36.48	2.6789	4	6.3	11.3	5.1	0	19811996	23					57012	106.12	34.59	1.6645	1664.5	8.10833	10.5917	71.5
52815	95.18	36.48	2.6789	5	12.6	18.6	5.4	0	19811996	25					52884	103.57	36.21	1.6685	1668.5	7.375	11.0667	56.9167
52815	95.18	36.48	2.6789	6	16.9	23.5	5.4	0	19811996	29					53707	105.15	36.56	1.6979	1697.9	7.275	10.1917	51.1667
52815	95.18	36.48	2.6789	7	19.4	25.9	5.3	0	19811996	31					53727	107.07	37.1	1.7125	1712.5	7.31667	9.39167	53.75
52815	95.18	36.48	2.6789	8	18.5	24.1	4.8	0	19811996	28					56092	104.39	35	1.7282	1728.2	8.15833	11.2833	67.8333
52713	95.22	37.51	3.1732	1	-12.6	-12.4	1.1	10.5	19812010	44	2.40833	6.21667	35.25		52896	104.09	36.33	1.7387	1738.7	8.875	11.5333	50.1667
52713	95.22	37.51	3.1732	2	-8.3	-6.8	1.6	10.5	19812010	35					52993	105.04	35.41	1.7394	1739.4	7.00833	9.46667	62.5
52713	95.22	37.51	3.1732	3	-2.8	0.2	2.3	10.5	19812010	30					52993	105.04	35.41	1.7394	1739.4	7.58333	9.88333	62.75
52713	95.22	37.51	3.1732	4	3.3	8.7	2.8	10.5	19812010	28					53817	106.16	36	1.753	1753	6.91667	9.15833	61.3333
52713	95.22	37.51	3.1732	5	9.2	16.3	2.8	10.5	19812010	31					56095	104.23	34.02	1.7532	1753.2	9.75	13.0333	65.6667
52713	95.22	37.51	3.1732	6	13.5	21.2	2.6	10.5	19812010	37					52661	101.05	38.48	1.7655	1765.5	7.01667	10.1833	46.3333
52713	95.22	37.51	3.1732	7	16.2	23.5	2.4	10.5	19812010	40					53908	105.14	35.13	1.7682	1768.2	7.175	10.15	69.8333
52713	95.22	37.51	3.1732	8	15	21.3	2.3	10.5	19812010	37					52323	97.02	41.48	1.7704	1770.4	4.8	7.60833	39.75
52713	95.22	37.51	3.1732	9	9.8	14.2	2.1	10.5	19812010	35					52876	102.51	36.19	1.8139	1813.9	8.3	11.2833	58.1667
52713	95.22	37.51	3.1732	10	2	4.4	1.7	10.5	19812010	31					53806	105.39	36.34	1.8542	1854.2	7.725	9.39167	51.4167
52713	95.22	37.51	3.1732	11	-5.6	-5.1	1.3	10.5	19812010	35					52972	102.33	35.5	1.8703	1870.3	8.95833	12.225	53.6667
52713	95.22	37.51	3.1732	12	-10.8	-10.9	1.1	10.5	19812010	40					52983	104.09	35.52	1.8744	1874.4	6.95833	10.2917	63
56016	95.36	33.51	4.1791	1	-12.3	-11.3	2.1	10.5	19812010	44	-1	2.775	55.8333		56091	104.28	34.51	1.8833	1883.3	7.76667	10.9917	66.5
56016	95.36	33.51	4.1791	2	-9.5	-7	2.4	10.5	19812010	42					52986	103.52	35.22	1.8938	1893.8	7.46667	10.6	67.4167
56016	95.36	33.51	4.1791	3	-5.1	-1.6	2.6	10.5	19812010	42					52995	104.37	35.35	1.8972	1897.2	7.23333	10.1667	63.1667
56016	95.36	33.51	4.1791	4	-0.7	4.7	2.4	10.5	19812010	47					53903	105.43	35.58	1.9165	1916.5	5.825	9.01667	65.4167
56016	95.36	33.51	4.1791	5	3.7	10.3	2.1	10.5	19812010	58					52984	103.11	35.35	1.9172	1917.2	7.29167	10.5333	66.9167
56016	95.36	33.51	4.1791	6	7.3	12.8	1.8	10.5	19812010	68					53916	106.19	35.3	1.9486	1948.6	6.23333	8.89167	65.4167
56016	95.36	33.51	4.1791	7	9.7	15.1	1.5	10.5	19812010	69					52982	103.33	35.29	1.9532	1953.2	6.9	10.2417	68.75
56016	95.36	33.51	4.1791	8	9	14	1.5	10.5	19812010	70					52674	101.58	38.14	1.9769	1976.9	5.41667	8.40833	51.8333
56016	95.36	33.51	4.1791	9	5.8	9.8	1.3	10.5	19812010	73					52874	102.23	36.29	1.9809	1980.9	7.83333	10.825	56.4167
56016	95.36	33.51	4.1791	10	-0.6	2.9	1.5	10.5	19812010	63					52988	103.43	35.22	2.0006	2000.6	6.55	10.075	68.9167
56016	95.36	33.51	4.1791	11	-7.6	-5.4	1.6	10.5	19812010	50					52784	102.54	37.28	2.0724	2072.4	5.73333	8.65833	51.3333
56016	95.36	33.51	4.1791	12	-11.7	-11	1.8	10.5	19812010	44					53914	106.07	35.37	2.0786	2078.6	5.625	8.225	64.8333
56021	95.47	34.08	4.175	1	-13.6	-11.9	1.8	10.5	19812010	45	-1.76667	2.21667	54.8333		52963	102.02	35.56	2.0857	2085.7	8.33333	11.3	49.6667
56021	95.47	34.08	4.175	2	-10.4	-7.6	2.6	10.5	19812010	41					52998	104.12	35.08	2.111	2111	6.1	9.38333	68.3333
56021	95.47	34.08	4.175	3	-5.7	-1.9	3	10.5	19812010	42					52885	103.15	36.45	2.1188	2118.8	5.79167	8.875	58.5
56021	95.47	34.08	4.175	4	-1.2	4.1	2.9	10.5	19812010	46					52875	102.06	36.3	2.125	2125	7.31667	10.6417	53.75
56021	95.47	34.08	4.175	5	3.1	8.8	2.8	10.5	19812010	58					52515	94.52	39.31	2.1372	2137.2	7.24167	9.94167	34.0833
56021	95.47	34.08	4.175	6	6.7	12	2.5	10.5	19812010	67					52985	103.2	35.25	2.1628	2162.8	5.825	9.325	70.0833
56021	95.47	34.08	4.175	7	9.3	14.4	2.2	10.5	19812010	68					52868	101.26	36.02	2.2371	2237.1	7.55833	10.9833	52.8333
56021	95.47	34.08	4.175	8	8.6	13.6	2.1	10.5	19812010	67					52656	100.49	38.26	2.2814	2281.4	4.05833	7.375	52.5833
56021	95.47	34.08	4.175	9	5.1	9.3	2	10.5	19812010	70					52866	101.45	36.43	2.2952	2295.2	6.125	9.14167	56.0833
56021	95.47	34.08	4.175	10	-1.3	2.5	1.9	10.5	19812010	61					52643	99.37	38.5	2.3118	2311.8	4.23333	6.7	47.75
56021	95.47	34.08	4.175	11	-8.8	-5.4	1.6	10.5	19812010	49					56093	104.01	34.26	2.315	2315	6.1	9.14167	68
56021	95.47	34.08	4.175	12	-13	-11.3	1.5	10.5	19812010	44					56084	103.14	34.04	2.3742	2374.2	7.35833	10.8833	64.25
52424	95.47	40.32	1.1709	9	17.2	20.8	2.4	10.5	19812010	42	9.2	11.9583	41.1667		52981	103.23	35.4	2.428	2428	5.575	8.275	61.6667
52424	95.47	40.32	1.1709	10	8.5	9.8	2.1	10.5	19812010	42					52862	101.41	36.57	2.45	2450	2.98333	6.04167	65
52424	95.47	40.32	1.1709	11	-0.4	-0.9	2.5	10.5	19812010	49					52862	101.41	36.57	2.45	2450	4.99167	7.61667	60.5
52424	95.47	40.32	1.1709	12	-8	-8.6	2.4	10.5	19812010	57					52996	105.01	35.23	2.4506	2450.6	3.91667	6.80833	69.9167
52424	95.47	40.32	1.1709	1	-9.2	-9.5	2.5	10.5	19812010	53					52863	101.57	36.49	2.48	2480	4.075	7.58333	62.8333
52424	95.47	40.32	1.1709	2	-3.6	-3.3	3.2	10.5	19812010	38					52974	102.01	35.31	2.4914	2491.4	6.05833	8.53333	54.0833
52424	95.47	40.32	1.1709	3	3.9	5.3	3.5	10.5	19812010	33					56082	103.3	34.35	2.5403	2540.3	5.45833	8.99167	64.3333
52424	95.47	40.32	1.1709	4	12.1	15.3	3.4	10.5	19812010	28					52869	101.34	36.31	2.6675	2667.5	4.29167	6.85833	59.0833
52424	95.47	40.32	1.1709	5	18.7	24.1	3	10.5	19812010	30					52855	101.15	36.41	2.676	2676	3.36667	6.925	61.25
52424	95.47	40.32	1.1709	6	23.2	30.1	2.5	10.5	19812010	36					52815	95.18	36.48	2.6789	2678.9	5.525	9.525	27.5833
52424	95.47	40.32	1.1709	7	24.9	31.8	2.3	10.5	19812010	43					52707	93.41	36.48	2.767	2767	4.35833	8.04167	31.9167
52424	95.47	40.32	1.1709	8	23.1	28.6	2.3	10.5	19812010	43					52602	93.2	38.45	2.77	2770	3.15	7.34167	29.8333
52825	96.25	36.26	2.7904	1	-9.2	-11.4	2.5	10.5	19812010	39	5.275	7.95	35.0833		52657	100.15	38.11	2.7874	2787.4	1.35833	4.83333	53.5833
52825	96.25	36.26	2.7904	2	-4.7	-4.2	2.8	10.5	19812010	29					52825	96.25	36.26	2.7904	2790.4	5.275	7.95	35.0833
52825	96.25	36.26	2.7904	3	1.1	3.7	3.3	10.5	19812010	26					52818	94.54	36.25	2.8076	2807.6	5.75833	8.65833	32.0833
52825	96.25	36.26	2.7904	4	6.9	11.4	3.7	10.5	19812010	25					56081	103.21	34.42	2.8102	2810.2	3.725	7.04167	65.1667
52825	96.25	36.26	2.7904	5	12.3	18.6	3.2	10.5	19812010	31					52877	102.16	36.06	2.8347	2834.7	2.83333	5.98333	59.75
52825	96.25	36.26	2.7904	6	15.8	22.9	2.6	10.5	19812010	41					52856	100.37	36.16	2.835	2835	4.55	7.45833	49.25
52825	96.25	36.26	2.7904	7	18	25.3	2.3	10.5	19812010	45					53910	106.12	35.4	2.8412	2841.2	1.45833	4.01667	68.6667
52825	96.25	36.26	2.7904	8	16.9	23.1	2.3	10.5	19812010	42					52765	101.37	37.23	2.85	2850	1.25833	4.275	61.5
52825	96.25	36.26	2.7904	9	12.3	16.5	2.2	10.5	19812010	39					52835	97.48	36.04	2.9054	2905.4	4	8.25833	42.0833
52825	96.25	36.26	2.7904	10	4.9	6.4	2.4	10.5	19812010	34					56080	102.54	35	2.91	2910	2.81667	5.90833	63.75
52825	96.25	36.26	2.7904	11	-2.9	-5.4	2.5	10.5	19812010	33					52978	102.31	35.12	2.9294	2929.4	3.38333	6.44167	59.5
52825	96.25	36.26	2.7904	12	-8.1	-11.5	2.5	10.5	19812010	37					52833	98.29	36.55	2.95	2950	3.725	7.68333	42.75
56029	97.01	33.01	3.6812	1	-6.8	-8.9	1.1	10.5	19812010	41	3.75	5.96667	53.0833		52737	97.22	37.22	2.9815	2981.5	4.40833	6.68333	38.5833
56029	97.01	33.01	3.6812	2	-3.9	-3.1	1.4	10.5	19812010	39					52853	100.59	36.55	3.01	3010	0.891667	4.925	61
56029	97.01	33.01	3.6812	3	0.5	2.8	1.6	10.5	19812010	40					52787	102.52	37.12	3.0451	3045.1	0.325	2.19167	58.3333
56029	97.01	33.01	3.6812	4	4.3	8.8	1.5	10.5	19812010	46					52842	99.05	36.47	3.0876	3087.6	2.25	5.01667	43.0833
56029	97.01	33.01	3.6812	5	8.2	13.4	1.3	10.5	19812010	55					56071	102.3	34.35	3.1057	3105.7	2.875	6.40833	64.4167
56029	97.01	33.01	3.6812	6	11.5	16	1	10.5	19812010	64					52955	100.45	35.35	3.12	3120	2.55	6.025	53.5
56029	97.01	33.01	3.6812	7	13.3	17.8	0.9	10.5	19812010	66					52957	100.35	35.15	3.1481	3148.1	0.566667	4.44167	55.9167
56029	97.01	33.01	3.6812	8	12.5	16.6	0.8	10.5	19812010	66					52713	95.22	37.51	3.1732	3173.2	2.40833	6.21667	35.25
56029	97.01	33.01	3.6812	9	9.6	12.5	0.8	10.5	19812010	68					52836	98.06	36.18	3.189	3189	3.40833	5.84167	38.75
56029	97.01	33.01	3.6812	10	4.2	6.2	0.9	10.5	19812010	62					52854	100.16	36.37	3.2394	3239.4	0.791667	4.09167	58
56029	97.01	33.01	3.6812	11	-2.2	-1.9	0.9	10.5	19812010	48					52754	100.08	37.2	3.3015	3301.5	0.025	3.16667	54
56029	97.01	33.01	3.6812	12	-6.2	-8.6	0.9	10.5	19812010	42					52645	99.35	38.25	3.32	3320	-2.35	1.41667	58.75
52436	97.02	40.16	1.526	1	-9.6	-10.3	3.6	10.5	19812010	54	7.5	9.9	42.3333		52943	99.59	35.35	3.3232	3323.2	1.70833	4.84167	50.75
52436	97.02	40.16	1.526	2	-5.2	-5.1	3.7	10.5	19812010	42					52633	98.25	38.48	3.367	3367	-2.20833	1.49167	51.25
52436	97.02	40.16	1.526	3	1.7	2.9	3.9	10.5	19812010	37					52745	99.02	37.18	3.4171	3417.1	-0.7	3.04167	50.6667
52436	97.02	40.16	1.526	4	9.7	12.8	4	10.5	19812010	30					56079	102.58	33.35	3.4414	3441.4	1.44167	4.73333	67.5
52436	97.02	40.16	1.526	5	16.1	21.2	3.2	10.5	19812010	32					56074	102.05	34	3.4714	3471.4	1.825	5.25833	61.8333
52436	97.02	40.16	1.526	6	20.6	27.3	2.8	10.5	19812010	39					56065	101.36	34.44	3.5	3500	-0.275	3.375	64.4167
52436	97.02	40.16	1.526	7	22.3	28.8	2.7	10.5	19812010	45					56067	101.29	33.26	3.6285	3628.5	1.06667	3.825	65.0833
52436	97.02	40.16	1.526	8	20.8	25.6	2.6	10.5	19812010	44					52968	101.28	35.02	3.6628	3662.8	-1.325	2.35	62.75
52436	97.02	40.16	1.526	9	15	18	2.6	10.5	19812010	43					56029	97.01	33.01	3.6812	3681.2	3.75	5.96667	53.0833
52436	97.02	40.16	1.526	10	7.4	8.1	2.8	10.5	19812010	41					56043	100.15	34.28	3.719	3719	-0.0833333	3.475	61.8333
52436	97.02	40.16	1.526	11	-0.9	-1.6	3.6	10.5	19812010	46					56046	99.39	33.45	3.9675	3967.5	-0.533333	2.36667	60.5
52436	97.02	40.16	1.526	12	-7.9	-8.9	3.8	10.5	19812010	55					56045	99.54	33.58	4.05	4050	-2.2	1.38333	65.1667
52323	97.02	41.48	1.7704	1	-11.8	-11.7	4.2	10.6	19822010	53	4.8	7.60833	39.75		56021	95.47	34.08	4.175	4175	-1.76667	2.21667	54.8333
52323	97.02	41.48	1.7704	2	-8.4	-7.2	4.2	10.6	19822010	45					56016	95.36	33.51	4.1791	4179.1	-1	2.775	55.8333
52323	97.02	41.48	1.7704	3	-2.3	0.1	4.5	10.6	19822010	37					56041	99.12	34.16	4.2111	4211.1	-3.88333	-0.658333	66.6667
52323	97.02	41.48	1.7704	4	5.7	9.5	5.1	10.6	19822010	30					56033	98.13	34.55	4.2723	4272.3	-3.33333	0.8	56.4167
52323	97.02	41.48	1.7704	5	13	18.3	4.9	10.6	19822010	29					56034	97.08	33.48	4.4154	4415.4	-4.34167	-0.541667	66.0833
52323	97.02	41.48	1.7704	6	18.6	24.3	4.6	10.6	19822010	32					56004	92.26	34.13	4.5331	4533.1	-3.75833	0.291667	53.0833
52323	97.02	41.48	1.7704	7	20.9	26	4.3	10.6	19822010	37					52908	93.05	35.13	4.6122	4612.2	-5.05	-0.775	56.25
52323	97.02	41.48	1.7704	8	18.9	23.4	4.1	10.6	19822010	36
52323	97.02	41.48	1.7704	9	12.7	16	4.1	10.6	19822010	36
52323	97.02	41.48	1.7704	10	4.3	6.2	4.2	10.6	19822010	40
52323	97.02	41.48	1.7704	11	-3.9	-3.4	4.6	10.6	19822010	48
52323	97.02	41.48	1.7704	12	-10.1	-10.2	4.6	10.6	19822010	54
56034	97.08	33.48	4.4154	1	-16.6	-14.6	2.6	10.5	19812010	58	-4.34167	-0.541667	66.0833
56034	97.08	33.48	4.4154	2	-13.5	-10.4	3	10.5	19812010	55
56034	97.08	33.48	4.4154	3	-8.8	-4.5	3.4	10.5	19812010	56
56034	97.08	33.48	4.4154	4	-3.6	1.5	3.2	10.5	19812010	60
56034	97.08	33.48	4.4154	5	0.9	5.5	3	10.5	19812010	68
56034	97.08	33.48	4.4154	6	4.7	8.7	2.7	10.5	19812010	74
56034	97.08	33.48	4.4154	7	7	11.2	2.7	10.5	19812010	75
56034	97.08	33.48	4.4154	8	6.1	10.6	2.4	10.5	19812010	75
56034	97.08	33.48	4.4154	9	3	6.8	2.4	10.5	19812010	77
56034	97.08	33.48	4.4154	10	-3.4	0.4	2.2	10.5	19812010	72
56034	97.08	33.48	4.4154	11	-11.7	-7.9	2.2	10.5	19812010	64
56034	97.08	33.48	4.4154	12	-16.2	-13.8	2.4	10.5	19812010	59
52737	97.22	37.22	2.9815	1	-10.2	-11.9	1.3	10.5	19812010	43	4.40833	6.68333	38.5833
52737	97.22	37.22	2.9815	2	-5.8	-5.5	1.6	10.5	19812010	35
52737	97.22	37.22	2.9815	3	-0.1	1.9	1.9	10.5	19812010	30
52737	97.22	37.22	2.9815	4	6	10.3	2.3	10.5	19812010	29
52737	97.22	37.22	2.9815	5	11.1	16.5	2.4	10.5	19812010	36
52737	97.22	37.22	2.9815	6	14.5	19.7	2.4	10.5	19812010	44
52737	97.22	37.22	2.9815	7	17	21.8	2.2	10.5	19812010	48
52737	97.22	37.22	2.9815	8	16.4	20.9	2.1	10.5	19812010	44
52737	97.22	37.22	2.9815	9	11.6	14.8	1.6	10.5	19812010	44
52737	97.22	37.22	2.9815	10	4.3	5.7	1.3	10.5	19812010	37
52737	97.22	37.22	2.9815	11	-3.3	-3.9	1.2	10.5	19812010	34
52737	97.22	37.22	2.9815	12	-8.6	-10.1	1.2	10.5	19812010	39
52835	97.48	36.04	2.9054	5	10.5	17.3	2.8	0	19811997	40	4	8.25833	42.0833
52835	97.48	36.04	2.9054	6	13.6	20.1	2.2	0	19811997	51
52835	97.48	36.04	2.9054	7	15.6	22.1	2	0	19811997	55
52835	97.48	36.04	2.9054	8	14.8	21.1	2.1	0	19811997	51
52835	97.48	36.04	2.9054	9	9.9	15.4	2	0	19811997	50
52835	97.48	36.04	2.9054	10	3.6	7.3	2.5	0	19811997	43
52835	97.48	36.04	2.9054	11	-2.9	-1.4	3.3	0	19811997	36
52835	97.48	36.04	2.9054	12	-7.6	-7.2	3.1	0	19811997	36
52835	97.48	36.04	2.9054	1	-9.4	-8.5	3	0	19811997	40
52835	97.48	36.04	2.9054	2	-5.6	-2.9	3	0	19811997	34
52835	97.48	36.04	2.9054	3	0.2	4.4	2.9	0	19811997	35
52835	97.48	36.04	2.9054	4	5.3	11.4	3.1	0	19811997	34
52836	98.06	36.18	3.189	5	9.1	13.9	2.4	10.5	19812004	38	3.40833	5.84167	38.75
52836	98.06	36.18	3.189	6	12.8	17.7	2	10.5	19812004	46
52836	98.06	36.18	3.189	7	15.2	20	1.9	10.5	19812004	48
52836	98.06	36.18	3.189	8	14.5	18.7	1.9	10.5	19812004	44
52836	98.06	36.18	3.189	1	-9.6	-10.5	2	10.5	19812004	41
52836	98.06	36.18	3.189	2	-6.2	-5.3	2.1	10.5	19812004	35
52836	98.06	36.18	3.189	3	-1.1	1.4	2.3	10.5	19812004	33
52836	98.06	36.18	3.189	4	4.4	8.5	2.5	10.5	19812004	31
52836	98.06	36.18	3.189	9	9.8	13.1	1.7	10.5	19812004	43
52836	98.06	36.18	3.189	10	3.2	4.9	1.8	10.5	19812004	35
52836	98.06	36.18	3.189	11	-3.4	-3.6	2.1	10.5	19812004	33
52836	98.06	36.18	3.189	12	-7.8	-8.7	2	10.5	19812004	38
56033	98.13	34.55	4.2723	1	-15.7	-14	2.5	10.5	19812010	53	-3.33333	0.8	56.4167
56033	98.13	34.55	4.2723	2	-12.6	-9.3	3	10.5	19812010	49
56033	98.13	34.55	4.2723	3	-8	-3.3	3.5	10.5	19812010	49
56033	98.13	34.55	4.2723	4	-2.8	2.9	3.6	10.5	19812010	48
56033	98.13	34.55	4.2723	5	1.8	7.9	3.7	10.5	19812010	56
56033	98.13	34.55	4.2723	6	5.4	10.8	3.6	10.5	19812010	65
56033	98.13	34.55	4.2723	7	8	13	3.4	10.5	19812010	67
56033	98.13	34.55	4.2723	8	7.4	12.4	3.2	10.5	19812010	63
56033	98.13	34.55	4.2723	9	3.8	8.2	3	10.5	19812010	65
56033	98.13	34.55	4.2723	10	-2.6	1.1	2.9	10.5	19812010	60
56033	98.13	34.55	4.2723	11	-10.1	-7.2	2.5	10.5	19812010	52
56033	98.13	34.55	4.2723	12	-14.6	-12.9	2.3	10.5	19812010	50
52633	98.25	38.48	3.367	1	-16.9	-15.6	1.3	10.5	19812010	44	-2.20833	1.49167	51.25
52633	98.25	38.48	3.367	2	-12.7	-9.9	2.1	10.5	19812010	39
52633	98.25	38.48	3.367	3	-7.2	-3.3	2.9	10.5	19812010	41
52633	98.25	38.48	3.367	4	-0.8	4.5	3.3	10.5	19812010	44
52633	98.25	38.48	3.367	5	4.5	10.2	3.2	10.5	19812010	52
52633	98.25	38.48	3.367	6	8.4	13.9	2.8	10.5	19812010	59
52633	98.25	38.48	3.367	7	10.9	15.7	2.6	10.5	19812010	64
52633	98.25	38.48	3.367	8	9.9	13.9	2.4	10.5	19812010	64
52633	98.25	38.48	3.367	9	5.2	9.2	2.1	10.5	19812010	62
52633	98.25	38.48	3.367	10	-2	1.7	1.9	10.5	19812010	54
52633	98.25	38.48	3.367	11	-10.1	-7.8	1.5	10.5	19812010	47
52633	98.25	38.48	3.367	12	-15.7	-14.6	1.2	10.5	19812010	45
52833	98.29	36.55	2.95	5	10.5	17	2.8	10.5	19812010	41	3.725	7.68333	42.75
52833	98.29	36.55	2.95	6	13.6	20.4	2.3	10.5	19812010	51
52833	98.29	36.55	2.95	7	15.8	22.6	2.1	10.5	19812010	56
52833	98.29	36.55	2.95	8	15.2	21.5	2.2	10.5	19812010	52
52833	98.29	36.55	2.95	9	11	15.2	2.2	10.5	19812010	50
52833	98.29	36.55	2.95	10	3.9	6.7	2.4	10.5	19812010	40
52833	98.29	36.55	2.95	11	-3.9	-2.8	2.5	10.5	19812010	38
52833	98.29	36.55	2.95	12	-9.4	-9	2.2	10.5	19812010	41
52833	98.29	36.55	2.95	1	-10.8	-9.8	2.3	10.5	19812010	43
52833	98.29	36.55	2.95	2	-6.3	-3.8	2.7	10.5	19812010	35
52833	98.29	36.55	2.95	3	-0.4	3.2	3.2	10.5	19812010	32
52833	98.29	36.55	2.95	4	5.5	11	3.2	10.5	19812010	34
52533	98.29	39.46	1.4772	1	-8.9	-9.8	1.9	10.6	19812010	55	7.79167	10.2833	47.75
52533	98.29	39.46	1.4772	2	-4.4	-4.3	2.1	10.6	19812010	46
52533	98.29	39.46	1.4772	3	2.1	3.8	2.4	10.6	19812010	42
52533	98.29	39.46	1.4772	4	10.1	13.7	2.9	10.6	19812010	34
52533	98.29	39.46	1.4772	5	16.2	21.8	2.4	10.6	19812010	37
52533	98.29	39.46	1.4772	6	20.6	27.4	2.1	10.6	19812010	45
52533	98.29	39.46	1.4772	7	22.3	28.8	2	10.6	19812010	52
52533	98.29	39.46	1.4772	8	20.6	25.8	1.9	10.6	19812010	52
52533	98.29	39.46	1.4772	9	14.9	18.1	1.8	10.6	19812010	53
52533	98.29	39.46	1.4772	10	7.6	8.3	1.9	10.6	19812010	49
52533	98.29	39.46	1.4772	11	-0.3	-1.3	2	10.6	19812010	51
52533	98.29	39.46	1.4772	12	-7.3	-8.9	1.8	10.6	19812010	57
52447	98.53	40	1.2705	1	-8.9	-9.5	2.2	10.5	19812010	55	8.75	11.675	44.6667
52447	98.53	40	1.2705	2	-4.1	-3.8	2.2	10.5	19812010	43
52447	98.53	40	1.2705	3	2.9	4.9	2.5	10.5	19812010	39
52447	98.53	40	1.2705	4	11.2	15	2.7	10.5	19812010	31
52447	98.53	40	1.2705	5	17.7	23.8	2.4	10.5	19812010	34
52447	98.53	40	1.2705	6	22.3	29.9	2.1	10.5	19812010	40
52447	98.53	40	1.2705	7	24.2	31.3	2.1	10.5	19812010	46
52447	98.53	40	1.2705	8	22.4	27.9	1.9	10.5	19812010	47
52447	98.53	40	1.2705	9	16.2	19.9	1.6	10.5	19812010	48
52447	98.53	40	1.2705	10	8.3	9.5	1.7	10.5	19812010	46
52447	98.53	40	1.2705	11	0	-0.6	2.2	10.5	19812010	50
52447	98.53	40	1.2705	12	-7.2	-8.2	2.3	10.5	19812010	57
52745	99.02	37.18	3.4171	1	-13.4	-12.3	3.3	10.5	19812010	39	-0.7	3.04167	50.6667
52745	99.02	37.18	3.4171	2	-10.5	-8	3.6	10.5	19812010	36
52745	99.02	37.18	3.4171	3	-5.5	-1.7	3.9	10.5	19812010	38
52745	99.02	37.18	3.4171	4	0.4	5.7	3.9	10.5	19812010	42
52745	99.02	37.18	3.4171	5	5	11	3.4	10.5	19812010	55
52745	99.02	37.18	3.4171	6	8.3	14.1	2.9	10.5	19812010	66
52745	99.02	37.18	3.4171	7	10.7	16.4	2.7	10.5	19812010	70
52745	99.02	37.18	3.4171	8	9.9	15.4	2.6	10.5	19812010	69
52745	99.02	37.18	3.4171	9	5.9	10.3	2.6	10.5	19812010	67
52745	99.02	37.18	3.4171	10	-0.6	2.7	2.9	10.5	19812010	52
52745	99.02	37.18	3.4171	11	-7.2	-6	3.4	10.5	19812010	37
52745	99.02	37.18	3.4171	12	-11.4	-11.1	3.5	10.5	19812010	37
52842	99.05	36.47	3.0876	1	-11.4	-11.2	2.8	10.5	19812010	36	2.25	5.01667	43.0833
52842	99.05	36.47	3.0876	2	-8	-6.7	3	10.5	19812010	33
52842	99.05	36.47	3.0876	3	-2.3	0	3.7	10.5	19812010	32
52842	99.05	36.47	3.0876	4	3.8	7.8	3.8	10.5	19812010	34
52842	99.05	36.47	3.0876	5	8.9	14.2	3.5	10.5	19812010	44
52842	99.05	36.47	3.0876	6	12.1	17.3	2.9	10.5	19812010	55
52842	99.05	36.47	3.0876	7	14.6	19.8	2.8	10.5	19812010	58
52842	99.05	36.47	3.0876	8	13.8	18.6	2.6	10.5	19812010	56
52842	99.05	36.47	3.0876	9	9.3	12.7	2.6	10.5	19812010	56
52842	99.05	36.47	3.0876	10	2.1	4	2.7	10.5	19812010	44
52842	99.05	36.47	3.0876	11	-5.7	-5.6	2.9	10.5	19812010	34
52842	99.05	36.47	3.0876	12	-10.2	-10.7	3	10.5	19812010	35
56041	99.12	34.16	4.2111	1	-17.4	-15.9	2.6	0	19811997	64	-3.88333	-0.658333	66.6667
56041	99.12	34.16	4.2111	2	-13.7	-11.3	3.3	0	19811997	62
56041	99.12	34.16	4.2111	3	-8.4	-5.8	3.9	0	19811997	62
56041	99.12	34.16	4.2111	4	-3.1	0.7	3.9	0	19811997	62
56041	99.12	34.16	4.2111	5	2	5.9	3.8	0	19811997	66
56041	99.12	34.16	4.2111	6	5.4	9.6	3.6	0	19811997	71
56041	99.12	34.16	4.2111	7	7.5	12	3.4	0	19811997	73
56041	99.12	34.16	4.2111	8	6.9	11.8	3.2	0	19811997	70
56041	99.12	34.16	4.2111	9	3.4	7.1	2.8	0	19811997	74
56041	99.12	34.16	4.2111	10	-2.6	0.1	2.9	0	19811997	70
56041	99.12	34.16	4.2111	11	-10.7	-8.1	2.8	0	19811997	63
56041	99.12	34.16	4.2111	12	-15.9	-14	2.5	0	19811997	63
52446	99.31	40.18	1.1774	1	-9	-9.1	3	10.5	19812010	53	8.75	11.4917	44.6667
52446	99.31	40.18	1.1774	2	-4.5	-4.1	3	10.5	19812010	43
52446	99.31	40.18	1.1774	3	2.6	4.2	3.2	10.5	19812010	39
52446	99.31	40.18	1.1774	4	11	14.6	3.4	10.5	19812010	34
52446	99.31	40.18	1.1774	5	17.8	23.2	3	10.5	19812010	35
52446	99.31	40.18	1.1774	6	22.5	29.1	2.7	10.5	19812010	41
52446	99.31	40.18	1.1774	7	24.5	31.2	2.4	10.5	19812010	46
52446	99.31	40.18	1.1774	8	22.4	27.9	2.3	10.5	19812010	48
52446	99.31	40.18	1.1774	9	16.5	19.7	2.2	10.5	19812010	47
52446	99.31	40.18	1.1774	10	8.5	9.6	2.3	10.5	19812010	45
52446	99.31	40.18	1.1774	11	-0.1	-0.6	3	10.5	19812010	51
52446	99.31	40.18	1.1774	12	-7.2	-7.8	3.3	10.5	19812010	54
52645	99.35	38.25	3.32	1	-16.1	-14.7	2.2	10.5	19912010	51	-2.35	1.41667	58.75
52645	99.35	38.25	3.32	2	-12.5	-9.8	2.6	10.5	19912010	48
52645	99.35	38.25	3.32	3	-7	-3.1	3	10.5	19912010	49
52645	99.35	38.25	3.32	4	-0.9	4.4	3.1	10.5	19912010	51
52645	99.35	38.25	3.32	5	3.7	9.3	3	10.5	19912010	59
52645	99.35	38.25	3.32	6	7.6	12.9	2.7	10.5	19912010	65
52645	99.35	38.25	3.32	7	10.1	15	2.5	10.5	19912010	71
52645	99.35	38.25	3.32	8	9.1	13.5	2.3	10.5	19912010	72
52645	99.35	38.25	3.32	9	5.1	9.1	2.2	10.5	19912010	71
52645	99.35	38.25	3.32	10	-2.2	1.5	2.1	10.5	19912010	63
52645	99.35	38.25	3.32	11	-9.9	-7.5	2.2	10.5	19912010	54
52645	99.35	38.25	3.32	12	-15.2	-13.6	2.2	10.5	19912010	51
52643	99.37	38.5	2.3118	1	-9.4	-10.6	1.5	10.5	19812010	43	4.23333	6.7	47.75
52643	99.37	38.5	2.3118	2	-6.8	-6.1	1.8	10.5	19812010	41
52643	99.37	38.5	2.3118	3	-1.6	0.8	2	10.5	19812010	43
52643	99.37	38.5	2.3118	4	5.3	9.8	2.4	10.5	19812010	42
52643	99.37	38.5	2.3118	5	10.9	16.4	2.6	10.5	19812010	44
52643	99.37	38.5	2.3118	6	15	20.7	2.4	10.5	19812010	50
52643	99.37	38.5	2.3118	7	16.8	21.9	2.3	10.5	19812010	57
52643	99.37	38.5	2.3118	8	15.5	19.9	2.1	10.5	19812010	58
52643	99.37	38.5	2.3118	9	11.1	14.1	2.1	10.5	19812010	56
52643	99.37	38.5	2.3118	10	4.3	5.9	2.1	10.5	19812010	50
52643	99.37	38.5	2.3118	11	-2.5	-3	1.7	10.5	19812010	45
52643	99.37	38.5	2.3118	12	-7.8	-9.4	1.4	10.5	19812010	44
56046	99.39	33.45	3.9675	1	-12	-11.3	1.9	10.5	19812010	50	-0.533333	2.36667	60.5
56046	99.39	33.45	3.9675	2	-9	-7.4	2.2	10.5	19812010	49
56046	99.39	33.45	3.9675	3	-4.5	-2	2.6	10.5	19812010	52
56046	99.39	33.45	3.9675	4	0.3	3.8	2.6	10.5	19812010	55
56046	99.39	33.45	3.9675	5	4.3	8.5	2.5	10.5	19812010	63
56046	99.39	33.45	3.9675	6	7.6	11.5	2.2	10.5	19812010	70
56046	99.39	33.45	3.9675	7	9.8	14	2.1	10.5	19812010	72
56046	99.39	33.45	3.9675	8	9	13.3	1.8	10.5	19812010	71
56046	99.39	33.45	3.9675	9	5.9	9.5	1.8	10.5	19812010	72
56046	99.39	33.45	3.9675	10	0.3	3.2	1.8	10.5	19812010	67
56046	99.39	33.45	3.9675	11	-6.7	-4.1	1.7	10.5	19812010	55
56046	99.39	33.45	3.9675	12	-11.4	-10.6	1.6	10.5	19812010	50
52546	99.5	39.22	1.3322	1	-8.9	-9	1.4	10.5	19812010	60	8.09167	11.2667	54
52546	99.5	39.22	1.3322	2	-4	-3.4	1.8	10.5	19812010	49
52546	99.5	39.22	1.3322	3	2.9	4.4	2.2	10.5	19812010	44
52546	99.5	39.22	1.3322	4	10.8	14.4	2.4	10.5	19812010	38
52546	99.5	39.22	1.3322	5	16.6	22.7	2.1	10.5	19812010	43
52546	99.5	39.22	1.3322	6	20.8	28.4	1.8	10.5	19812010	51
52546	99.5	39.22	1.3322	7	22.7	30	1.7	10.5	19812010	57
52546	99.5	39.22	1.3322	8	20.7	27	1.5	10.5	19812010	61
52546	99.5	39.22	1.3322	9	14.9	19.6	1.3	10.5	19812010	65
52546	99.5	39.22	1.3322	10	7.7	9.5	1.3	10.5	19812010	57
52546	99.5	39.22	1.3322	11	0	-0.6	1.5	10.5	19812010	60
52546	99.5	39.22	1.3322	12	-7.1	-7.8	1.4	10.5	19812010	63
56045	99.54	33.58	4.05	1	-14.6	-13.1	2.1	10.5	19812010	56	-2.2	1.38333	65.1667
56045	99.54	33.58	4.05	2	-11.3	-8.7	2.6	10.5	19812010	55
56045	99.54	33.58	4.05	3	-6.5	-3	2.9	10.5	19812010	57
56045	99.54	33.58	4.05	4	-1.1	3	2.9	10.5	19812010	59
56045	99.54	33.58	4.05	5	3.2	7.8	2.5	10.5	19812010	66
56045	99.54	33.58	4.05	6	6.6	11	2.2	10.5	19812010	73
56045	99.54	33.58	4.05	7	8.8	13.7	2	10.5	19812010	75
56045	99.54	33.58	4.05	8	7.9	13.1	1.8	10.5	19812010	75
56045	99.54	33.58	4.05	9	4.7	8.9	1.7	10.5	19812010	76
56045	99.54	33.58	4.05	10	-1.3	1.9	1.9	10.5	19812010	72
56045	99.54	33.58	4.05	11	-9.1	-6	2.1	10.5	19812010	62
56045	99.54	33.58	4.05	12	-13.7	-12	2.1	10.5	19812010	56
52943	99.59	35.35	3.3232	5	7.5	12.3	2.5	10.5	19812010	54	1.70833	4.84167	50.75
52943	99.59	35.35	3.3232	6	10.5	15	2.1	10.5	19812010	65
52943	99.59	35.35	3.3232	7	12.7	17	1.8	10.5	19812010	70
52943	99.59	35.35	3.3232	8	12	16.3	1.7	10.5	19812010	68
52943	99.59	35.35	3.3232	9	8.1	11.7	1.7	10.5	19812010	68
52943	99.59	35.35	3.3232	10	2	5	2	10.5	19812010	57
52943	99.59	35.35	3.3232	11	-5.1	-3.5	2.3	10.5	19812010	41
52943	99.59	35.35	3.3232	12	-9.8	-8.9	2.3	10.5	19812010	37
52943	99.59	35.35	3.3232	1	-11	-9.7	2.3	10.5	19812010	38
52943	99.59	35.35	3.3232	2	-7.4	-5.2	2.7	10.5	19812010	35
52943	99.59	35.35	3.3232	3	-2.3	0.6	3	10.5	19812010	36
52943	99.59	35.35	3.3232	4	3.3	7.5	3	10.5	19812010	40
52754	100.08	37.2	3.3015	1	-13	-11.8	2.8	10.5	19812010	46	0.025	3.16667	54
52754	100.08	37.2	3.3015	2	-9.8	-7.4	3.2	10.5	19812010	42
52754	100.08	37.2	3.3015	3	-4.6	-1.1	3.9	10.5	19812010	44
52754	100.08	37.2	3.3015	4	1.1	5.9	4.1	10.5	19812010	47
52754	100.08	37.2	3.3015	5	5.6	10.8	4	10.5	19812010	55
52754	100.08	37.2	3.3015	6	8.8	13.3	3.6	10.5	19812010	64
52754	100.08	37.2	3.3015	7	11.3	15.8	3.3	10.5	19812010	68
52754	100.08	37.2	3.3015	8	10.5	14.4	3.3	10.5	19812010	68
52754	100.08	37.2	3.3015	9	6.5	9.6	3	10.5	19812010	69
52754	100.08	37.2	3.3015	10	0.5	3.3	3.2	10.5	19812010	57
52754	100.08	37.2	3.3015	11	-6	-4.7	3.4	10.5	19812010	44
52754	100.08	37.2	3.3015	12	-10.6	-10.1	3.1	10.5	19812010	44
52557	100.1	39.09	1.4537	1	-8.4	-8.1	0	10.5	19812010	53	8.25833	12.2583	48.6667
52557	100.1	39.09	1.4537	2	-3.9	-2.4	0	10.5	19812010	43
52557	100.1	39.09	1.4537	3	2.9	5.8	0	10.5	19812010	40
52557	100.1	39.09	1.4537	4	10.8	15.8	0	10.5	19812010	33
52557	100.1	39.09	1.4537	5	16.7	23.8	0	10.5	19812010	38
52557	100.1	39.09	1.4537	6	20.9	29.2	0	10.5	19812010	46
52557	100.1	39.09	1.4537	7	22.7	30.6	0	10.5	19812010	53
52557	100.1	39.09	1.4537	8	21	27.6	1.8	10.5	19812010	56
52557	100.1	39.09	1.4537	9	15.4	20.4	1.5	10.5	19812010	58
52557	100.1	39.09	1.4537	10	7.8	10.7	1.5	10.5	19812010	54
52557	100.1	39.09	1.4537	11	0	0.7	1.8	10.5	19812010	54
52557	100.1	39.09	1.4537	12	-6.8	-7	1.8	10.5	19812010	56
56043	100.15	34.28	3.719	1	-11.9	-10.6	2.2	10.5	19812010	53	-0.0833333	3.475	61.8333
56043	100.15	34.28	3.719	2	-8.8	-6.4	2.5	10.5	19812010	51
56043	100.15	34.28	3.719	3	-4	-0.4	2.7	10.5	19812010	52
56043	100.15	34.28	3.719	4	0.9	6	2.5	10.5	19812010	56
56043	100.15	34.28	3.719	5	5	10.4	2.2	10.5	19812010	63
56043	100.15	34.28	3.719	6	8.2	12.9	2.1	10.5	19812010	70
56043	100.15	34.28	3.719	7	10.2	14.9	1.9	10.5	19812010	73
56043	100.15	34.28	3.719	8	9.5	14.2	1.8	10.5	19812010	72
56043	100.15	34.28	3.719	9	6.4	10.2	1.7	10.5	19812010	73
56043	100.15	34.28	3.719	10	0.9	4.1	1.7	10.5	19812010	67
56043	100.15	34.28	3.719	11	-6.3	-3.8	1.8	10.5	19812010	58
56043	100.15	34.28	3.719	12	-11.1	-9.8	1.9	10.5	19812010	54
52657	100.15	38.11	2.7874	1	-12.6	-12.6	1.3	10.5	19812010	44	1.35833	4.83333	53.5833
52657	100.15	38.11	2.7874	2	-8.7	-6.6	1.8	10.5	19812010	42
52657	100.15	38.11	2.7874	3	-3.3	0.6	2.1	10.5	19812010	45
52657	100.15	38.11	2.7874	4	3	8.7	2.4	10.5	19812010	48
52657	100.15	38.11	2.7874	5	7.7	13.9	2.5	10.5	19812010	54
52657	100.15	38.11	2.7874	6	11.4	17.3	2.2	10.5	19812010	60
52657	100.15	38.11	2.7874	7	13.4	18.6	1.9	10.5	19812010	66
52657	100.15	38.11	2.7874	8	12.2	17	1.9	10.5	19812010	67
52657	100.15	38.11	2.7874	9	8.3	12.3	1.8	10.5	19812010	65
52657	100.15	38.11	2.7874	10	2	5	1.7	10.5	19812010	57
52657	100.15	38.11	2.7874	11	-5.7	-4.7	1.5	10.5	19812010	48
52657	100.15	38.11	2.7874	12	-11.4	-11.5	1.3	10.5	19812010	47
52854	100.16	36.37	3.2394	1	-12.3	-11.4	2.9	0	19811997	48	0.791667	4.09167	58
52854	100.16	36.37	3.2394	2	-9.5	-7.2	3.3	0	19811997	44
52854	100.16	36.37	3.2394	3	-4.1	-0.5	3.6	0	19811997	46
52854	100.16	36.37	3.2394	4	1.3	6.5	3.5	0	19811997	53
52854	100.16	36.37	3.2394	5	6.2	11.9	3.3	0	19811997	61
52854	100.16	36.37	3.2394	6	9.4	15.3	3	0	19811997	70
52854	100.16	36.37	3.2394	7	11.7	17.5	2.7	0	19811997	73
52854	100.16	36.37	3.2394	8	11.3	16	2.8	0	19811997	73
52854	100.16	36.37	3.2394	9	7	10.1	2.9	0	19811997	72
52854	100.16	36.37	3.2394	10	1.8	3.9	3.5	0	19811997	60
52854	100.16	36.37	3.2394	11	-4.4	-3.8	4	0	19811997	47
52854	100.16	36.37	3.2394	12	-8.9	-9.2	3.7	0	19811997	49
52652	100.26	38.56	1.4827	1	-9.1	-8.4	1.5	10.5	19812010	54	7.78333	11.6917	51.5833
52652	100.26	38.56	1.4827	2	-4.4	-2.6	1.8	10.5	19812010	45
52652	100.26	38.56	1.4827	3	2.6	5.8	2.2	10.5	19812010	43
52652	100.26	38.56	1.4827	4	10.4	15.3	2.5	10.5	19812010	38
52652	100.26	38.56	1.4827	5	16.2	23	2.2	10.5	19812010	43
52652	100.26	38.56	1.4827	6	20.3	28.2	1.9	10.5	19812010	49
52652	100.26	38.56	1.4827	7	22.3	29.5	1.9	10.5	19812010	54
52652	100.26	38.56	1.4827	8	20.7	26.7	1.8	10.5	19812010	57
52652	100.26	38.56	1.4827	9	15	19.8	1.6	10.5	19812010	61
52652	100.26	38.56	1.4827	10	7.3	10.1	1.5	10.5	19812010	59
52652	100.26	38.56	1.4827	11	-0.6	0.1	1.7	10.5	19812010	58
52652	100.26	38.56	1.4827	12	-7.3	-7.2	1.6	10.5	19812010	58
52957	100.35	35.15	3.1481	1	-13	-10.6	3.2	10.5	19812000	43	0.566667	4.44167	55.9167
52957	100.35	35.15	3.1481	2	-8.7	-5.3	3.3	10.5	19812000	38
52957	100.35	35.15	3.1481	3	-3.2	0.8	3.6	10.5	19812000	41
52957	100.35	35.15	3.1481	4	2.3	7	3.5	10.5	19812000	48
52957	100.35	35.15	3.1481	5	7	11.8	3.3	10.5	19812000	59
52957	100.35	35.15	3.1481	6	10	14.6	2.8	10.5	19812000	69
52957	100.35	35.15	3.1481	7	11.7	16.8	2.4	10.5	19812000	74
52957	100.35	35.15	3.1481	8	10.8	16	2.5	10.5	19812000	72
52957	100.35	35.15	3.1481	9	6.8	10.8	2.5	10.5	19812000	72
52957	100.35	35.15	3.1481	10	1.2	4.5	2.7	10.5	19812000	63
52957	100.35	35.15	3.1481	11	-6.5	-3.8	3.1	10.5	19812000	50
52957	100.35	35.15	3.1481	12	-11.6	-9.3	3.2	10.5	19812000	42
52856	100.37	36.16	2.835	1	-9	-9.2	1.2	10.5	19812010	43	4.55	7.45833	49.25
52856	100.37	36.16	2.835	2	-4.9	-3.6	1.7	10.5	19812010	37
52856	100.37	36.16	2.835	3	0.7	3.5	2.3	10.5	19812010	37
52856	100.37	36.16	2.835	4	6.4	11.2	2.5	10.5	19812010	40
52856	100.37	36.16	2.835	5	10.8	16.4	2.3	10.5	19812010	48
52856	100.37	36.16	2.835	6	13.9	19.4	2	10.5	19812010	56
52856	100.37	36.16	2.835	7	16	21.1	1.8	10.5	19812010	61
52856	100.37	36.16	2.835	8	15.3	19.9	1.7	10.5	19812010	61
52856	100.37	36.16	2.835	9	11	14.4	1.5	10.5	19812010	64
52856	100.37	36.16	2.835	10	4.8	7.1	1.5	10.5	19812010	56
52856	100.37	36.16	2.835	11	-2.5	-2.1	1.4	10.5	19812010	44
52856	100.37	36.16	2.835	12	-7.9	-8.6	1.2	10.5	19812010	44
52955	100.45	35.35	3.12	1	-10.7	-9.9	1.5	10.5	19812010	44	2.55	6.025	53.5
52955	100.45	35.35	3.12	2	-6.7	-4.5	1.8	10.5	19812010	39
52955	100.45	35.35	3.12	3	-1.2	2.1	2	10.5	19812010	40
52955	100.45	35.35	3.12	4	4.5	9.4	2.1	10.5	19812010	45
52955	100.45	35.35	3.12	5	8.8	14.1	2	10.5	19812010	55
52955	100.45	35.35	3.12	6	11.8	17.5	1.6	10.5	19812010	64
52955	100.45	35.35	3.12	7	13.8	19.4	1.4	10.5	19812010	69
52955	100.45	35.35	3.12	8	13	18.2	1.4	10.5	19812010	68
52955	100.45	35.35	3.12	9	8.9	12.8	1.3	10.5	19812010	69
52955	100.45	35.35	3.12	10	2.7	5.5	1.4	10.5	19812010	59
52955	100.45	35.35	3.12	11	-4.7	-3	1.5	10.5	19812010	46
52955	100.45	35.35	3.12	12	-9.6	-9.3	1.4	10.5	19812010	44
52656	100.49	38.26	2.2814	9	11	14.5	2.5	6.1	19812010	60	4.05833	7.375	52.5833
52656	100.49	38.26	2.2814	10	4.2	6.4	2.5	6.1	19812010	56
52656	100.49	38.26	2.2814	11	-3	-2.1	2.7	6.1	19812010	51
52656	100.49	38.26	2.2814	12	-8.3	-8.2	2.8	6.1	19812010	49
52656	100.49	38.26	2.2814	1	-10.1	-9.7	2.7	6.1	19812010	49
52656	100.49	38.26	2.2814	2	-7.1	-5.2	2.7	6.1	19812010	46
52656	100.49	38.26	2.2814	3	-1.6	1.4	2.7	6.1	19812010	48
52656	100.49	38.26	2.2814	4	5.3	9.7	2.9	6.1	19812010	46
52656	100.49	38.26	2.2814	5	11	16.4	3.1	6.1	19812010	47
52656	100.49	38.26	2.2814	6	15.2	21.8	2.6	6.1	19812010	54
52656	100.49	38.26	2.2814	7	16.8	23	2.4	6.1	19812010	62
52656	100.49	38.26	2.2814	8	15.3	20.5	2.6	6.1	19812010	63
52853	100.59	36.55	3.01	1	-12.9	-10.9	2.5	10.5	19812010	52	0.891667	4.925	61
52853	100.59	36.55	3.01	2	-8.9	-5.8	3	10.5	19812010	49
52853	100.59	36.55	3.01	3	-3.3	0.9	3.6	10.5	19812010	50
52853	100.59	36.55	3.01	4	2.7	8.2	3.4	10.5	19812010	53
52853	100.59	36.55	3.01	5	7.1	13.2	3.1	10.5	19812010	60
52853	100.59	36.55	3.01	6	10.4	16.5	2.7	10.5	19812010	67
52853	100.59	36.55	3.01	7	12.5	18	2.4	10.5	19812010	72
52853	100.59	36.55	3.01	8	11.6	16.5	2.5	10.5	19812010	73
52853	100.59	36.55	3.01	9	7.5	11.2	2.5	10.5	19812010	74
52853	100.59	36.55	3.01	10	1.3	4.5	2.6	10.5	19812010	67
52853	100.59	36.55	3.01	11	-6	-3.6	2.4	10.5	19812010	59
52853	100.59	36.55	3.01	12	-11.3	-9.6	2.3	10.5	19812010	56
52267	101.04	41.57	0.9405	1	-10.6	-10.5	2.2	10.5	19812010	48	9.39167	12.8417	33.5833
52267	101.04	41.57	0.9405	2	-5	-3.8	2.5	10.5	19812010	35
52267	101.04	41.57	0.9405	3	2.7	5.4	3	10.5	19812010	28
52267	101.04	41.57	0.9405	4	11.8	16.3	3.7	10.5	19812010	22
52267	101.04	41.57	0.9405	5	19.5	25.8	3.7	10.5	19812010	22
52267	101.04	41.57	0.9405	6	25.2	32.3	3.4	10.5	19812010	25
52267	101.04	41.57	0.9405	7	27.5	34.6	3.2	10.5	19812010	31
52267	101.04	41.57	0.9405	8	24.9	30.8	2.9	10.5	19812010	33
52267	101.04	41.57	0.9405	9	18.2	22.4	2.6	10.5	19812010	33
52267	101.04	41.57	0.9405	10	8.8	10.9	2.5	10.5	19812010	35
52267	101.04	41.57	0.9405	11	-1.2	-0.7	2.6	10.5	19812010	41
52267	101.04	41.57	0.9405	12	-9.1	-9.4	2.4	10.5	19812010	50
52661	101.05	38.48	1.7655	1	-8.9	-8.3	1.8	10.5	19812010	50	7.01667	10.1833	46.3333
52661	101.05	38.48	1.7655	2	-4.9	-3.2	2.1	10.5	19812010	43
52661	101.05	38.48	1.7655	3	1.4	4.5	2.4	10.5	19812010	41
52661	101.05	38.48	1.7655	4	8.7	13.3	2.8	10.5	19812010	36
52661	101.05	38.48	1.7655	5	14.6	20.4	2.7	10.5	19812010	40
52661	101.05	38.48	1.7655	6	18.8	25.2	2.4	10.5	19812010	46
52661	101.05	38.48	1.7655	7	20.9	26.6	2.2	10.5	19812010	52
52661	101.05	38.48	1.7655	8	19.8	24.2	2.4	10.5	19812010	50
52661	101.05	38.48	1.7655	9	14.7	17.8	2.1	10.5	19812010	51
52661	101.05	38.48	1.7655	10	7.2	9.1	2	10.5	19812010	48
52661	101.05	38.48	1.7655	11	-1	-0.3	2	10.5	19812010	48
52661	101.05	38.48	1.7655	12	-7.1	-7.1	1.9	10.5	19812010	51
52855	101.15	36.41	2.676	1	-10	-9.2	1.3	10.5	19812008	45	3.36667	6.925	61.25
52855	101.15	36.41	2.676	2	-6.3	-4.3	1.7	10.5	19812008	44
52855	101.15	36.41	2.676	3	-0.7	2.7	2.1	10.5	19812008	47
52855	101.15	36.41	2.676	4	5.3	9.8	2.2	10.5	19812008	54
52855	101.15	36.41	2.676	5	9.7	15.6	1.6	10.5	19812008	60
52855	101.15	36.41	2.676	6	12.5	18.8	1	10.5	19812008	71
52855	101.15	36.41	2.676	7	14.3	20.4	0.9	10.5	19812008	77
52855	101.15	36.41	2.676	8	13.4	18.9	0.8	10.5	19812008	78
52855	101.15	36.41	2.676	9	9.5	13.4	0.8	10.5	19812008	77
52855	101.15	36.41	2.676	10	3.8	6.6	1.1	10.5	19812008	69
52855	101.15	36.41	2.676	11	-2.9	-1.8	1.2	10.5	19812008	60
52855	101.15	36.41	2.676	12	-8.2	-7.8	1.2	10.5	19812008	53
52868	101.26	36.02	2.2371	1	-5.7	-5.4	1.3	10.5	19812010	43	7.55833	10.9833	52.8333
52868	101.26	36.02	2.2371	2	-1.6	0.1	2	10.5	19812010	40
52868	101.26	36.02	2.2371	3	4	7.5	2.7	10.5	19812010	41
52868	101.26	36.02	2.2371	4	9.7	14.9	2.7	10.5	19812010	44
52868	101.26	36.02	2.2371	5	13.6	19.6	2.2	10.5	19812010	53
52868	101.26	36.02	2.2371	6	16.5	22.9	1.8	10.5	19812010	61
52868	101.26	36.02	2.2371	7	18.7	24.5	1.7	10.5	19812010	63
52868	101.26	36.02	2.2371	8	18.4	23.4	1.8	10.5	19812010	61
52868	101.26	36.02	2.2371	9	13.7	17.5	1.8	10.5	19812010	65
52868	101.26	36.02	2.2371	10	7.4	10.3	1.6	10.5	19812010	61
52868	101.26	36.02	2.2371	11	0.5	1.3	1.2	10.5	19812010	52
52868	101.26	36.02	2.2371	12	-4.5	-4.8	1.1	10.5	19812010	50
52968	101.28	35.02	3.6628	1	-13.3	-11.7	2.9	10.5	19812010	50	-1.325	2.35	62.75
52968	101.28	35.02	3.6628	2	-10.3	-7.3	3.1	10.5	19812010	48
52968	101.28	35.02	3.6628	3	-5.6	-1.7	3.3	10.5	19812010	51
52968	101.28	35.02	3.6628	4	-0.2	4.7	3.3	10.5	19812010	58
52968	101.28	35.02	3.6628	5	3.8	9	3.3	10.5	19812010	67
52968	101.28	35.02	3.6628	6	7.1	11.9	3.1	10.5	19812010	74
52968	101.28	35.02	3.6628	7	9.3	14.3	2.7	10.5	19812010	77
52968	101.28	35.02	3.6628	8	8.5	13.5	2.5	10.5	19812010	76
52968	101.28	35.02	3.6628	9	4.9	8.8	2.5	10.5	19812010	77
52968	101.28	35.02	3.6628	10	-0.6	2.7	2.5	10.5	19812010	70
52968	101.28	35.02	3.6628	11	-7.5	-5.3	2.6	10.5	19812010	56
52968	101.28	35.02	3.6628	12	-12	-10.7	2.9	10.5	19812010	49
56067	101.29	33.26	3.6285	1	-9.7	-8.8	2.1	10.5	19812010	52	1.06667	3.825	65.0833
56067	101.29	33.26	3.6285	2	-7	-4.8	2.3	10.5	19812010	54
56067	101.29	33.26	3.6285	3	-2.6	0.2	2.3	10.5	19812010	58
56067	101.29	33.26	3.6285	4	1.7	4.9	2.2	10.5	19812010	63
56067	101.29	33.26	3.6285	5	5.3	9.2	2	10.5	19812010	69
56067	101.29	33.26	3.6285	6	8.5	11.9	1.9	10.5	19812010	74
56067	101.29	33.26	3.6285	7	10.6	14.2	1.8	10.5	19812010	75
56067	101.29	33.26	3.6285	8	9.9	13.6	1.8	10.5	19812010	76
56067	101.29	33.26	3.6285	9	7	10.2	1.8	10.5	19812010	76
56067	101.29	33.26	3.6285	10	2	4.6	1.9	10.5	19812010	71
56067	101.29	33.26	3.6285	11	-4.3	-2	2	10.5	19812010	60
56067	101.29	33.26	3.6285	12	-8.6	-7.3	2.1	10.5	19812010	53
52869	101.34	36.31	2.6675	1	-7.9	-8.3	1	10.5	19812010	48	4.29167	6.85833	59.0833
52869	101.34	36.31	2.6675	2	-5.1	-3.6	1.3	10.5	19812010	48
52869	101.34	36.31	2.6675	3	-0.2	2.3	1.7	10.5	19812010	51
52869	101.34	36.31	2.6675	4	5.5	9.3	1.9	10.5	19812010	52
52869	101.34	36.31	2.6675	5	9.9	14.5	1.7	10.5	19812010	57
52869	101.34	36.31	2.6675	6	13.1	18.1	1.4	10.5	19812010	65
52869	101.34	36.31	2.6675	7	15.2	20.1	1.2	10.5	19812010	69
52869	101.34	36.31	2.6675	8	14.2	18.4	1.2	10.5	19812010	72
52869	101.34	36.31	2.6675	9	9.9	12.7	1.1	10.5	19812010	75
52869	101.34	36.31	2.6675	10	4.5	6.3	1.2	10.5	19812010	68
52869	101.34	36.31	2.6675	11	-1.4	-0.8	1.1	10.5	19812010	54
52869	101.34	36.31	2.6675	12	-6.2	-6.7	1	10.5	19812010	50
56065	101.36	34.44	3.5	1	-12.9	-10.7	1.7	10.5	19812010	54	-0.275	3.375	64.4167
56065	101.36	34.44	3.5	2	-9.2	-6	2.2	10.5	19812010	53
56065	101.36	34.44	3.5	3	-4	-0.4	2.6	10.5	19812010	56
56065	101.36	34.44	3.5	4	1.1	5.5	2.7	10.5	19812010	60
56065	101.36	34.44	3.5	5	5	9.4	2.6	10.5	19812010	67
56065	101.36	34.44	3.5	6	8.3	12.6	2.4	10.5	19812010	72
56065	101.36	34.44	3.5	7	10.4	15.1	2	10.5	19812010	75
56065	101.36	34.44	3.5	8	9.6	14.3	1.9	10.5	19812010	75
56065	101.36	34.44	3.5	9	6.2	10	2	10.5	19812010	76
56065	101.36	34.44	3.5	10	0.5	3.8	1.8	10.5	19812010	71
56065	101.36	34.44	3.5	11	-6.6	-3.7	1.7	10.5	19812010	60
56065	101.36	34.44	3.5	12	-11.7	-9.4	1.5	10.5	19812010	54
52765	101.37	37.23	2.85	1	-12.6	-11.8	1.2	10.5	19832010	49	1.25833	4.275	61.5
52765	101.37	37.23	2.85	2	-8.1	-5.7	1.6	10.5	19832010	47
52765	101.37	37.23	2.85	3	-2.7	0.7	2	10.5	19832010	53
52765	101.37	37.23	2.85	4	2.9	6.8	2.1	10.5	19832010	57
52765	101.37	37.23	2.85	5	7.3	11.4	2	10.5	19832010	62
52765	101.37	37.23	2.85	6	10.6	15.3	1.7	10.5	19832010	68
52765	101.37	37.23	2.85	7	12.6	17.3	1.4	10.5	19832010	73
52765	101.37	37.23	2.85	8	11.5	15.6	1.3	10.5	19832010	75
52765	101.37	37.23	2.85	9	8	11	1.4	10.5	19832010	75
52765	101.37	37.23	2.85	10	2.2	4.5	1.3	10.5	19832010	69
52765	101.37	37.23	2.85	11	-5.4	-3.5	1.2	10.5	19832010	58
52765	101.37	37.23	2.85	12	-11.2	-10.3	1.1	10.5	19832010	52
52862	101.41	36.57	2.45	5	11.1	16	1.4	10.5	19932010	57	4.99167	7.61667	60.5
52862	101.41	36.57	2.45	6	13.9	18.8	1.2	10.5	19932010	65
52862	101.41	36.57	2.45	7	16.1	20.7	1.1	10.5	19932010	71
52862	101.41	36.57	2.45	8	15	18.9	1.1	10.5	19932010	73
52862	101.41	36.57	2.45	1	-8.6	-8.6	1.3	10.5	19932010	52
52862	101.41	36.57	2.45	2	-4.1	-2.6	1.6	10.5	19932010	48
52862	101.41	36.57	2.45	3	1.3	4	1.7	10.5	19932010	51
52862	101.41	36.57	2.45	4	7	11.5	1.7	10.5	19932010	51
52862	101.41	36.57	2.45	9	11	13.5	1.1	10.5	19932010	75
52862	101.41	36.57	2.45	10	5.3	6.9	1.2	10.5	19932010	68
52862	101.41	36.57	2.45	11	-1.1	-0.4	1.2	10.5	19932010	60
52862	101.41	36.57	2.45	12	-7	-7.3	1.3	10.5	19932010	55
52862	101.41	36.57	2.45	1	-10.4	-9.3	1.7	10.5	119811992	52	2.98333	6.04167	65
52862	101.41	36.57	2.45	2	-6.6	-4.4	2.1	10.5	119811992	51
52862	101.41	36.57	2.45	3	-1	2	2.1	10.5	119811992	57
52862	101.41	36.57	2.45	4	4.7	8.6	2	10.5	119811992	61
52862	101.41	36.57	2.45	5	9.4	13.8	1.9	10.5	119811992	63
52862	101.41	36.57	2.45	6	12.2	17.1	1.3	10.5	119811992	73
52862	101.41	36.57	2.45	7	13.8	18.7	1.1	10.5	119811992	78
52862	101.41	36.57	2.45	8	12.9	17.5	1.1	10.5	119811992	78
52862	101.41	36.57	2.45	9	8.8	11.8	1.1	10.5	119811992	78
52862	101.41	36.57	2.45	10	3.9	6.2	1.4	10.5	119811992	72
52862	101.41	36.57	2.45	11	-3.2	-1.7	1.6	10.5	119811992	62
52862	101.41	36.57	2.45	12	-8.7	-7.8	1.7	10.5	119811992	55
52576	101.41	39.13	1.5101	1	-7.9	-7.3	2.5	10	19812010	46	9.15833	12.1167	35.9167
52576	101.41	39.13	1.5101	2	-3.6	-2	3.1	10	19812010	37
52576	101.41	39.13	1.5101	3	2.9	5.8	3.5	10	19812010	31
52576	101.41	39.13	1.5101	4	10.8	14.9	3.7	10	19812010	25
52576	101.41	39.13	1.5101	5	17.4	22.5	3.8	10	19812010	26
52576	101.41	39.13	1.5101	6	22.4	28	3.7	10	19812010	30
52576	101.41	39.13	1.5101	7	24.6	29.8	3.7	10	19812010	36
52576	101.41	39.13	1.5101	8	22.7	27.1	3.7	10	19812010	39
52576	101.41	39.13	1.5101	9	17.1	20.2	3.3	10	19812010	39
52576	101.41	39.13	1.5101	10	9.2	11.1	2.8	10	19812010	37
52576	101.41	39.13	1.5101	11	0.5	1.2	2.6	10	19812010	39
52576	101.41	39.13	1.5101	12	-6.2	-5.9	2.7	10	19812010	46
52866	101.45	36.43	2.2952	9	12.3	15.6	1	10.5	19812010	70	6.125	9.14167	56.0833
52866	101.45	36.43	2.2952	10	6.4	8.7	1.1	10.5	19812010	65
52866	101.45	36.43	2.2952	11	-0.3	0.4	0.9	10.5	19812010	55
52866	101.45	36.43	2.2952	12	-5.9	-6.1	0.9	10.5	19812010	50
52866	101.45	36.43	2.2952	1	-7.3	-7.5	0.9	10.5	19812010	47
52866	101.45	36.43	2.2952	2	-3.5	-1.9	1.4	10.5	19812010	44
52866	101.45	36.43	2.2952	3	2	5.1	1.6	10.5	19812010	46
52866	101.45	36.43	2.2952	4	8.1	12.8	1.7	10.5	19812010	48
52866	101.45	36.43	2.2952	5	12.4	17.9	1.5	10.5	19812010	54
52866	101.45	36.43	2.2952	6	15.4	20.9	1.3	10.5	19812010	61
52866	101.45	36.43	2.2952	7	17.4	22.7	1.1	10.5	19812010	66
52866	101.45	36.43	2.2952	8	16.5	21.1	1.1	10.5	19812010	67
52863	101.57	36.49	2.48	1	-9.7	-7.9	1	10.5	19812010	50	4.075	7.58333	62.8333
52863	101.57	36.49	2.48	2	-5.7	-3.1	1.2	10.5	19812010	49
52863	101.57	36.49	2.48	3	0	3.4	1.3	10.5	19812010	54
52863	101.57	36.49	2.48	4	5.9	10.2	1.5	10.5	19812010	56
52863	101.57	36.49	2.48	5	10.5	15.5	1.3	10.5	19812010	60
52863	101.57	36.49	2.48	6	13.4	18.8	1	10.5	19812010	69
52863	101.57	36.49	2.48	7	15.3	20.8	0.8	10.5	19812010	74
52863	101.57	36.49	2.48	8	14.3	19.3	0.8	10.5	19812010	76
52863	101.57	36.49	2.48	9	10.3	13.7	0.9	10.5	19812010	77
52863	101.57	36.49	2.48	10	4.6	7.3	0.9	10.5	19812010	72
52863	101.57	36.49	2.48	11	-2.1	-0.3	0.9	10.5	19812010	62
52863	101.57	36.49	2.48	12	-7.9	-6.7	1	10.5	19812010	55
52674	101.58	38.14	1.9769	5	12.6	18.1	3.4	10.5	19812010	47	5.41667	8.40833	51.8333
52674	101.58	38.14	1.9769	6	16.3	22.5	3	10.5	19812010	56
52674	101.58	38.14	1.9769	7	18.2	24.1	2.8	10.5	19812010	63
52674	101.58	38.14	1.9769	8	17.2	21.7	2.7	10.5	19812010	61
52674	101.58	38.14	1.9769	9	12.5	15.5	2.4	10.5	19812010	61
52674	101.58	38.14	1.9769	10	5.5	7.4	2.5	10.5	19812010	57
52674	101.58	38.14	1.9769	11	-1.7	-1.1	2.5	10.5	19812010	52
52674	101.58	38.14	1.9769	12	-7.2	-7.5	2.4	10.5	19812010	49
52674	101.58	38.14	1.9769	1	-9.3	-9	2.1	10.5	19812010	46
52674	101.58	38.14	1.9769	2	-6.2	-4.7	2.5	10.5	19812010	44
52674	101.58	38.14	1.9769	3	-0.1	2.5	3	10.5	19812010	45
52674	101.58	38.14	1.9769	4	7.2	11.4	3.5	10.5	19812010	41
52974	102.01	35.31	2.4914	1	-6.6	-7.1	1.3	10.5	19812010	41	6.05833	8.53333	54.0833
52974	102.01	35.31	2.4914	2	-3.2	-2.4	1.5	10.5	19812010	42
52974	102.01	35.31	2.4914	3	2	4.4	1.7	10.5	19812010	45
52974	102.01	35.31	2.4914	4	7.8	11.8	1.9	10.5	19812010	47
52974	102.01	35.31	2.4914	5	11.9	16.5	1.8	10.5	19812010	55
52974	102.01	35.31	2.4914	6	14.7	19.7	1.5	10.5	19812010	63
52974	102.01	35.31	2.4914	7	16.7	21.6	1.4	10.5	19812010	67
52974	102.01	35.31	2.4914	8	16.1	20.4	1.5	10.5	19812010	66
52974	102.01	35.31	2.4914	9	12	15	1.4	10.5	19812010	69
52974	102.01	35.31	2.4914	10	6.3	8.3	1.3	10.5	19812010	63
52974	102.01	35.31	2.4914	11	0.1	0.2	1.3	10.5	19812010	49
52974	102.01	35.31	2.4914	12	-5.1	-6	1.2	10.5	19812010	42
52963	102.02	35.56	2.0857	1	-5.1	-5.2	1.4	10.5	19812010	38	8.33333	11.3	49.6667
52963	102.02	35.56	2.0857	2	-1.1	0.4	1.9	10.5	19812010	37
52963	102.02	35.56	2.0857	3	4.4	7.9	2.1	10.5	19812010	40
52963	102.02	35.56	2.0857	4	10.4	15.4	2.1	10.5	19812010	42
52963	102.02	35.56	2.0857	5	14.6	20.2	1.8	10.5	19812010	49
52963	102.02	35.56	2.0857	6	17.6	23.1	1.6	10.5	19812010	57
52963	102.02	35.56	2.0857	7	19.7	24.9	1.5	10.5	19812010	61
52963	102.02	35.56	2.0857	8	18.9	23.3	1.5	10.5	19812010	61
52963	102.02	35.56	2.0857	9	14.4	17.4	1.5	10.5	19812010	64
52963	102.02	35.56	2.0857	10	8.5	10.7	1.6	10.5	19812010	59
52963	102.02	35.56	2.0857	11	1.7	2.1	1.4	10.5	19812010	46
52963	102.02	35.56	2.0857	12	-4	-4.6	1.2	10.5	19812010	42
56074	102.05	34	3.4714	5	6.1	11.1	2.5	10.5	19812010	66	1.825	5.25833	61.8333
56074	102.05	34	3.4714	6	9.3	13.4	2.3	10.5	19812010	72
56074	102.05	34	3.4714	7	11.4	15.9	2	10.5	19812010	75
56074	102.05	34	3.4714	8	10.7	15.2	1.8	10.5	19812010	76
56074	102.05	34	3.4714	9	7.4	11.2	1.8	10.5	19812010	77
56074	102.05	34	3.4714	10	2.4	5.5	1.8	10.5	19812010	71
56074	102.05	34	3.4714	11	-3.6	-1.1	1.9	10.5	19812010	55
56074	102.05	34	3.4714	12	-7.6	-6.3	2	10.5	19812010	46
56074	102.05	34	3.4714	1	-8.8	-7.3	2.1	10.5	19812010	44
56074	102.05	34	3.4714	2	-6.1	-3.4	2.3	10.5	19812010	48
56074	102.05	34	3.4714	3	-1.8	1.7	2.5	10.5	19812010	53
56074	102.05	34	3.4714	4	2.5	7.2	2.6	10.5	19812010	59
52875	102.06	36.3	2.125	5	13.4	19.5	2.4	10.5	19892010	51	7.31667	10.6417	53.75
52875	102.06	36.3	2.125	6	16.7	22.9	2.2	10.5	19892010	58
52875	102.06	36.3	2.125	7	18.7	24.3	2.1	10.5	19892010	63
52875	102.06	36.3	2.125	8	17.8	22.5	2.1	10.5	19892010	64
52875	102.06	36.3	2.125	9	13.5	16.9	2	10.5	19892010	68
52875	102.06	36.3	2.125	10	7.5	9.7	2.1	10.5	19892010	63
52875	102.06	36.3	2.125	11	0.9	1.7	2.2	10.5	19892010	52
52875	102.06	36.3	2.125	12	-4.6	-4.7	2.3	10.5	19892010	48
52875	102.06	36.3	2.125	1	-6.2	-5.8	2.4	10.5	19892010	45
52875	102.06	36.3	2.125	2	-2.3	-0.4	2.6	10.5	19892010	44
52875	102.06	36.3	2.125	3	3.2	6.7	2.8	10.5	19892010	45
52875	102.06	36.3	2.125	4	9.2	14.4	2.8	10.5	19892010	44
52877	102.16	36.06	2.8347	1	-9.6	-9.5	1.7	10.5	19812010	45	2.83333	5.98333	59.75
52877	102.16	36.06	2.8347	2	-6.8	-4.8	1.7	10.5	19812010	49
52877	102.16	36.06	2.8347	3	-1.7	1.8	1.9	10.5	19812010	53
52877	102.16	36.06	2.8347	4	4	9.2	2	10.5	19812010	54
52877	102.16	36.06	2.8347	5	8.6	13.9	1.9	10.5	19812010	59
52877	102.16	36.06	2.8347	6	11.9	17.2	1.6	10.5	19812010	65
52877	102.16	36.06	2.8347	7	13.9	19.2	1.4	10.5	19812010	70
52877	102.16	36.06	2.8347	8	12.9	17.6	1.5	10.5	19812010	73
52877	102.16	36.06	2.8347	9	8.7	12.1	1.4	10.5	19812010	76
52877	102.16	36.06	2.8347	10	3.2	5.8	1.4	10.5	19812010	71
52877	102.16	36.06	2.8347	11	-3.1	-2.2	1.6	10.5	19812010	55
52877	102.16	36.06	2.8347	12	-8	-8.5	1.8	10.5	19812010	47
52378	102.22	41.22	0.96	1	-10.6	-10.1	3.9	10	19812010	48	9.7	12.1917	31.1667
52378	102.22	41.22	0.96	2	-5.3	-4.3	4.3	10	19812010	34
52378	102.22	41.22	0.96	3	2.4	4.4	4.9	10	19812010	25
52378	102.22	41.22	0.96	4	12.1	15.4	5.4	10	19812010	19
52378	102.22	41.22	0.96	5	19.9	24.4	5.4	10	19812010	19
52378	102.22	41.22	0.96	6	25.8	30.9	5.3	10	19812010	22
52378	102.22	41.22	0.96	7	28.1	32.9	5.1	10	19812010	29
52378	102.22	41.22	0.96	8	25.5	29.5	4.8	10	19812010	31
52378	102.22	41.22	0.96	9	18.7	21.5	4.4	10	19812010	29
52378	102.22	41.22	0.96	10	9.3	10.7	4.3	10	19812010	31
52378	102.22	41.22	0.96	11	-0.8	-0.4	4.5	10	19812010	39
52378	102.22	41.22	0.96	12	-8.7	-8.6	4.3	10	19812010	48
52874	102.23	36.29	1.9809	1	-5.8	-5	1.5	10.5	19812010	47	7.83333	10.825	56.4167
52874	102.23	36.29	1.9809	2	-2	-0.5	1.7	10.5	19812010	45
52874	102.23	36.29	1.9809	3	3.6	6.2	2	10.5	19812010	48
52874	102.23	36.29	1.9809	4	9.8	14	2	10.5	19812010	47
52874	102.23	36.29	1.9809	5	14.1	19.3	1.8	10.5	19812010	55
52874	102.23	36.29	1.9809	6	17.3	22.8	1.7	10.5	19812010	61
52874	102.23	36.29	1.9809	7	19.4	24.5	1.5	10.5	19812010	64
52874	102.23	36.29	1.9809	8	18.5	22.7	1.5	10.5	19812010	66
52874	102.23	36.29	1.9809	9	14	17.1	1.3	10.5	19812010	70
52874	102.23	36.29	1.9809	10	8	10.3	1.3	10.5	19812010	66
52874	102.23	36.29	1.9809	11	1.4	2.3	1.5	10.5	19812010	56
52874	102.23	36.29	1.9809	12	-4.3	-3.8	1.4	10.5	19812010	52
56071	102.3	34.35	3.1057	5	7.7	12.6	0	10.5	19812010	66	2.875	6.40833	64.4167
56071	102.3	34.35	3.1057	6	10.8	15.5	0	10.5	19812010	71
56071	102.3	34.35	3.1057	7	12.9	17.9	0	10.5	19812010	75
56071	102.3	34.35	3.1057	8	12.1	17	0	10.5	19812010	76
56071	102.3	34.35	3.1057	1	-8.5	-7.2	0	10.5	19812010	51
56071	102.3	34.35	3.1057	2	-5.4	-2.4	0	10.5	19812010	53
56071	102.3	34.35	3.1057	3	-0.8	2.6	0	10.5	19812010	58
56071	102.3	34.35	3.1057	4	3.8	8.4	0	10.5	19812010	61
56071	102.3	34.35	3.1057	9	8.6	12.4	0	10.5	19812010	77
56071	102.3	34.35	3.1057	10	3.4	6.5	0	10.5	19812010	72
56071	102.3	34.35	3.1057	11	-2.8	-0.4	0	10.5	19812010	60
56071	102.3	34.35	3.1057	12	-7.3	-6	0	10.5	19812010	53
52978	102.31	35.12	2.9294	1	-8.1	-7.5	0	10.5	19812010	44	3.38333	6.44167	59.5
52978	102.31	35.12	2.9294	2	-5.3	-3	0	10.5	19812010	47
52978	102.31	35.12	2.9294	3	-0.8	2.5	0	10.5	19812010	52
52978	102.31	35.12	2.9294	4	4.2	8.7	0	10.5	19812010	56
52978	102.31	35.12	2.9294	5	8.3	13.3	0	10.5	19812010	62
52978	102.31	35.12	2.9294	6	11.5	16.2	0	10.5	19812010	68
52978	102.31	35.12	2.9294	7	13.7	18.5	0	10.5	19812010	72
52978	102.31	35.12	2.9294	8	12.9	17.1	0	10.5	19812010	73
52978	102.31	35.12	2.9294	9	9.1	12.1	0	10.5	19812010	74
52978	102.31	35.12	2.9294	10	3.8	6.3	0	10.5	19812010	68
52978	102.31	35.12	2.9294	11	-2.1	-0.7	0	10.5	19812010	53
52978	102.31	35.12	2.9294	12	-6.6	-6.2	0	10.5	19812010	45
52972	102.33	35.5	1.8703	9	15.1	18.4	2.6	10.5	19812010	66	8.95833	12.225	53.6667
52972	102.33	35.5	1.8703	10	9.3	11.9	2.5	10.5	19812010	62
52972	102.33	35.5	1.8703	11	2.4	3.5	2.2	10.5	19812010	50
52972	102.33	35.5	1.8703	12	-3	-3.3	1.9	10.5	19812010	50
52972	102.33	35.5	1.8703	1	-4.3	-3.8	2.2	10.5	19812010	44
52972	102.33	35.5	1.8703	2	-0.4	1.5	3.2	10.5	19812010	42
52972	102.33	35.5	1.8703	3	5	8.4	3.9	10.5	19812010	42
52972	102.33	35.5	1.8703	4	11	15.9	3.7	10.5	19812010	44
52972	102.33	35.5	1.8703	5	14.9	20.7	3.1	10.5	19812010	54
52972	102.33	35.5	1.8703	6	17.9	24	2.5	10.5	19812010	61
52972	102.33	35.5	1.8703	7	20.1	25.5	2.4	10.5	19812010	65
52972	102.33	35.5	1.8703	8	19.5	24	2.7	10.5	19812010	64
52679	102.4	37.55	1.5315	5	16.2	22.4	2	10.5	19812010	45	8.53333	12.1917	51.25
52679	102.4	37.55	1.5315	6	20.1	27.4	1.8	10.5	19812010	52
52679	102.4	37.55	1.5315	7	22.2	29.1	1.7	10.5	19812010	56
52679	102.4	37.55	1.5315	8	20.7	26.4	1.6	10.5	19812010	59
52679	102.4	37.55	1.5315	9	15.4	19.8	1.4	10.5	19812010	62
52679	102.4	37.55	1.5315	10	8.5	11.2	1.4	10.5	19812010	58
52679	102.4	37.55	1.5315	11	0.8	1.7	1.4	10.5	19812010	54
52679	102.4	37.55	1.5315	12	-5.4	-5.4	1.4	10.5	19812010	54
52679	102.4	37.55	1.5315	1	-7.2	-6.7	1.4	10.5	19812010	49
52679	102.4	37.55	1.5315	2	-3.1	-1.5	1.6	10.5	19812010	44
52679	102.4	37.55	1.5315	3	3.3	6.5	1.9	10.5	19812010	44
52679	102.4	37.55	1.5315	4	10.9	15.4	2.3	10.5	19812010	38
52575	102.47	39.25	1.2395	9	17.8	22.3	2.9	10.4	19812010	42	9.55833	13.675	37.1667
52575	102.47	39.25	1.2395	10	9.4	12.4	2.7	10.4	19812010	40
52575	102.47	39.25	1.2395	11	0.1	1.5	2.8	10.4	19812010	41
52575	102.47	39.25	1.2395	12	-6.8	-6.1	2.7	10.4	19812010	46
52575	102.47	39.25	1.2395	1	-8.6	-7.5	2.5	10.4	19812010	46
52575	102.47	39.25	1.2395	2	-4.2	-2.2	2.7	10.4	19812010	38
52575	102.47	39.25	1.2395	3	3.1	6.7	3.3	10.4	19812010	31
52575	102.47	39.25	1.2395	4	11.7	17	3.7	10.4	19812010	26
52575	102.47	39.25	1.2395	5	18.6	25.6	3.7	10.4	19812010	27
52575	102.47	39.25	1.2395	6	23.8	31.3	3.7	10.4	19812010	31
52575	102.47	39.25	1.2395	7	26	33.2	3.6	10.4	19812010	37
52575	102.47	39.25	1.2395	8	23.8	29.9	3.4	10.4	19812010	41
52876	102.51	36.19	1.8139	1	-5.8	-6.1	1.2	10.5	19812010	51	8.3	11.2833	58.1667
52876	102.51	36.19	1.8139	2	-1.6	-0.4	1.5	10.5	19812010	48
52876	102.51	36.19	1.8139	3	4.1	7	1.7	10.5	19812010	49
52876	102.51	36.19	1.8139	4	10.3	14.9	1.8	10.5	19812010	47
52876	102.51	36.19	1.8139	5	14.8	20.3	1.5	10.5	19812010	54
52876	102.51	36.19	1.8139	6	18.2	24.2	1.5	10.5	19812010	60
52876	102.51	36.19	1.8139	7	20.3	25.9	1.3	10.5	19812010	64
52876	102.51	36.19	1.8139	8	19.1	23.7	1.2	10.5	19812010	67
52876	102.51	36.19	1.8139	9	14.5	18	1.1	10.5	19812010	72
52876	102.51	36.19	1.8139	10	8.4	10.7	1.1	10.5	19812010	69
52876	102.51	36.19	1.8139	11	1.6	2.1	1.3	10.5	19812010	60
52876	102.51	36.19	1.8139	12	-4.3	-4.9	1.1	10.5	19812010	57
52787	102.52	37.12	3.0451	1	-11.3	-11.1	4.6	10.5	19812010	48	0.325	2.19167	58.3333
52787	102.52	37.12	3.0451	2	-9.7	-7.9	5.2	10.5	19812010	53
52787	102.52	37.12	3.0451	3	-5.5	-2.8	5.7	10.5	19812010	57
52787	102.52	37.12	3.0451	4	0.4	3.6	5.8	10.5	19812010	54
52787	102.52	37.12	3.0451	5	5.5	8.4	5.6	10.5	19812010	57
52787	102.52	37.12	3.0451	6	9.6	12.4	5.1	10.5	19812010	61
52787	102.52	37.12	3.0451	7	11.8	14.5	4.7	10.5	19812010	68
52787	102.52	37.12	3.0451	8	10.6	12.7	4.7	10.5	19812010	71
52787	102.52	37.12	3.0451	9	6.4	8	4.8	10.5	19812010	71
52787	102.52	37.12	3.0451	10	0.6	2.3	4.7	10.5	19812010	65
52787	102.52	37.12	3.0451	11	-5.1	-4.4	4.7	10.5	19812010	50
52787	102.52	37.12	3.0451	12	-9.4	-9.4	4.7	10.5	19812010	45
56080	102.54	35	2.91	1	-9.3	-8.8	0.9	10.5	19812010	48	2.81667	5.90833	63.75
56080	102.54	35	2.91	2	-6.1	-3.7	1.4	10.5	19812010	51
56080	102.54	35	2.91	3	-1.3	1.8	1.7	10.5	19812010	58
56080	102.54	35	2.91	4	3.7	7.7	1.9	10.5	19812010	62
56080	102.54	35	2.91	5	7.8	12.2	1.9	10.5	19812010	65
56080	102.54	35	2.91	6	11.1	15.6	1.7	10.5	19812010	71
56080	102.54	35	2.91	7	13.3	18.3	1.5	10.5	19812010	74
56080	102.54	35	2.91	8	12.5	17.1	1.4	10.5	19812010	75
56080	102.54	35	2.91	9	8.9	12.5	1.4	10.5	19812010	76
56080	102.54	35	2.91	10	3.6	6.4	1.3	10.5	19812010	73
56080	102.54	35	2.91	11	-2.6	-0.8	1	10.5	19812010	61
56080	102.54	35	2.91	12	-7.8	-7.4	0.9	10.5	19812010	51
52784	102.54	37.28	2.0724	1	-8.3	-7.4	4.1	10.5	19812010	45	5.73333	8.65833	51.3333
52784	102.54	37.28	2.0724	2	-5.4	-3.7	3.6	10.5	19812010	46
52784	102.54	37.28	2.0724	3	0.2	2.8	3.1	10.5	19812010	48
52784	102.54	37.28	2.0724	4	7.1	10.9	3.5	10.5	19812010	45
52784	102.54	37.28	2.0724	5	12.5	17.3	3.6	10.5	19812010	47
52784	102.54	37.28	2.0724	6	16.4	22.1	3.4	10.5	19812010	52
52784	102.54	37.28	2.0724	7	18.3	23.6	3.5	10.5	19812010	59
52784	102.54	37.28	2.0724	8	17.1	21.3	3.3	10.5	19812010	60
52784	102.54	37.28	2.0724	9	12.5	15.4	3.3	10.5	19812010	61
52784	102.54	37.28	2.0724	10	5.9	7.9	3.2	10.5	19812010	58
52784	102.54	37.28	2.0724	11	-1.1	-0.2	3.8	10.5	19812010	49
52784	102.54	37.28	2.0724	12	-6.4	-6.1	4	10.5	19812010	46
56079	102.58	33.35	3.4414	1	-9.6	-7.8	2.1	10.5	19812010	54	1.44167	4.73333	67.5
56079	102.58	33.35	3.4414	2	-6.5	-3.4	2.5	10.5	19812010	57
56079	102.58	33.35	3.4414	3	-2.1	1.4	2.7	10.5	19812010	61
56079	102.58	33.35	3.4414	4	2.1	5.5	2.7	10.5	19812010	66
56079	102.58	33.35	3.4414	5	5.7	9.8	2.7	10.5	19812010	70
56079	102.58	33.35	3.4414	6	9.1	13.5	2.6	10.5	19812010	74
56079	102.58	33.35	3.4414	7	11.2	15.8	2.2	10.5	19812010	76
56079	102.58	33.35	3.4414	8	10.4	15	2	10.5	19812010	77
56079	102.58	33.35	3.4414	9	7.1	10.4	2.3	10.5	19812010	78
56079	102.58	33.35	3.4414	10	2.1	4.7	2.2	10.5	19812010	75
56079	102.58	33.35	3.4414	11	-3.9	-1.5	1.9	10.5	19812010	65
56079	102.58	33.35	3.4414	12	-8.3	-6.6	1.9	10.5	19812010	57
52681	103.05	38.38	1.3675	1	-8.1	-8.2	2.1	10.5	19812010	47	8.825	11.7167	44.25
52681	103.05	38.38	1.3675	2	-3.8	-2.8	2.4	10.5	19812010	42
52681	103.05	38.38	1.3675	3	3.1	5.6	2.8	10.5	19812010	37
52681	103.05	38.38	1.3675	4	11	14.8	3.2	10.5	19812010	31
52681	103.05	38.38	1.3675	5	17.3	22.7	3	10.5	19812010	35
52681	103.05	38.38	1.3675	6	21.7	28.1	2.9	10.5	19812010	42
52681	103.05	38.38	1.3675	7	23.7	30	2.7	10.5	19812010	48
52681	103.05	38.38	1.3675	8	21.9	26.8	2.6	10.5	19812010	51
52681	103.05	38.38	1.3675	9	16.3	19.7	2.2	10.5	19812010	53
52681	103.05	38.38	1.3675	10	8.6	10.4	2.2	10.5	19812010	49
52681	103.05	38.38	1.3675	11	0.4	0.4	2.3	10.5	19812010	47
52681	103.05	38.38	1.3675	12	-6.2	-6.9	2.2	10.5	19812010	49
52984	103.11	35.35	1.9172	1	-6.3	-5.5	1.1	10.5	19812010	59	7.29167	10.5333	66.9167
52984	103.11	35.35	1.9172	2	-2.5	-0.6	1.3	10.5	19812010	57
52984	103.11	35.35	1.9172	3	3.1	6	1.5	10.5	19812010	59
52984	103.11	35.35	1.9172	4	9.2	13.3	1.7	10.5	19812010	57
52984	103.11	35.35	1.9172	5	13.6	18.8	1.3	10.5	19812010	63
52984	103.11	35.35	1.9172	6	16.6	22.5	1.1	10.5	19812010	70
52984	103.11	35.35	1.9172	7	18.6	24.1	0.9	10.5	19812010	74
52984	103.11	35.35	1.9172	8	17.8	22.3	0.9	10.5	19812010	75
52984	103.11	35.35	1.9172	9	13.4	16.8	0.9	10.5	19812010	79
52984	103.11	35.35	1.9172	10	7.5	10	0.9	10.5	19812010	78
52984	103.11	35.35	1.9172	11	1.1	2.5	1.1	10.5	19812010	69
52984	103.11	35.35	1.9172	12	-4.6	-3.8	1	10.5	19812010	63
56084	103.14	34.04	2.3742	5	11.9	17.1	0	10.5	19812010	65	7.35833	10.8833	64.25
56084	103.14	34.04	2.3742	6	14.7	19.9	0	10.5	19812010	72
56084	103.14	34.04	2.3742	7	16.9	22.1	0	10.5	19812010	74
56084	103.14	34.04	2.3742	8	16.4	20.9	0	10.5	19812010	73
56084	103.14	34.04	2.3742	9	12.8	16.2	0	10.5	19812010	76
56084	103.14	34.04	2.3742	10	7.7	10.2	0	10.5	19812010	74
56084	103.14	34.04	2.3742	11	1.9	4.1	0	10.5	19812010	62
56084	103.14	34.04	2.3742	12	-2.8	-1.7	0	10.5	19812010	56
56084	103.14	34.04	2.3742	1	-3.6	-2.2	0	10.5	19812010	53
56084	103.14	34.04	2.3742	2	-0.2	2.4	0	10.5	19812010	52
56084	103.14	34.04	2.3742	3	4.1	8.1	0	10.5	19812010	56
56084	103.14	34.04	2.3742	4	8.5	13.5	0	10.5	19812010	58
52885	103.15	36.45	2.1188	1	-8.1	-7.5	0	10.5	19822010	51	5.79167	8.875	58.5
52885	103.15	36.45	2.1188	2	-4.5	-2.4	0	10.5	19822010	51
52885	103.15	36.45	2.1188	3	1	4.4	0	10.5	19822010	52
52885	103.15	36.45	2.1188	4	7.4	12.1	0	10.5	19822010	49
52885	103.15	36.45	2.1188	5	12.3	17.5	0	10.5	19822010	54
52885	103.15	36.45	2.1188	6	15.6	21.2	0	10.5	19822010	61
52885	103.15	36.45	2.1188	7	17.6	23.1	0	10.5	19822010	67
52885	103.15	36.45	2.1188	8	16.8	21	0	10.5	19822010	67
52885	103.15	36.45	2.1188	9	12.3	15.1	0	10.5	19822010	71
52885	103.15	36.45	2.1188	10	6.2	8.3	0	10.5	19822010	67
52885	103.15	36.45	2.1188	11	-0.6	0.1	0	10.5	19822010	59
52885	103.15	36.45	2.1188	12	-6.5	-6.4	0	10.5	19822010	53
52980	103.18	35.58	1.648	1	-4.5	-5.4	0.7	10.5	19812010	55	9.68333	12.5	58.5833
52980	103.18	35.58	1.648	2	-0.5	0.5	1	10.5	19812010	50
52980	103.18	35.58	1.648	3	5.4	8.4	1.3	10.5	19812010	48
52980	103.18	35.58	1.648	4	11.9	16.4	1.3	10.5	19812010	47
52980	103.18	35.58	1.648	5	16.5	22.2	1.2	10.5	19812010	53
52980	103.18	35.58	1.648	6	19.8	25.8	1.1	10.5	19812010	59
52980	103.18	35.58	1.648	7	21.9	27.7	1	10.5	19812010	63
52980	103.18	35.58	1.648	8	20.6	25.4	0.9	10.5	19812010	67
52980	103.18	35.58	1.648	9	15.8	19.3	0.7	10.5	19812010	72
52980	103.18	35.58	1.648	10	9.7	11.7	0.7	10.5	19812010	70
52980	103.18	35.58	1.648	11	2.8	2.7	0.8	10.5	19812010	60
52980	103.18	35.58	1.648	12	-3.2	-4.7	0.7	10.5	19812010	59
52985	103.2	35.25	2.1628	1	-7.4	-6.2	0	10.5	19812010	62	5.825	9.325	70.0833
52985	103.2	35.25	2.1628	2	-3.7	-1.4	0	10.5	19812010	62
52985	103.2	35.25	2.1628	3	1.6	4.5	0	10.5	19812010	65
52985	103.2	35.25	2.1628	4	7.4	11.8	0	10.5	19812010	62
52985	103.2	35.25	2.1628	5	11.8	17.4	0	10.5	19812010	66
52985	103.2	35.25	2.1628	6	14.7	20.9	0	10.5	19812010	74
52985	103.2	35.25	2.1628	7	16.7	22.6	0	10.5	19812010	77
52985	103.2	35.25	2.1628	8	16.2	20.6	0	10.5	19812010	78
52985	103.2	35.25	2.1628	9	12.1	15.3	0	10.5	19812010	81
52985	103.2	35.25	2.1628	10	6.4	8.9	0	10.5	19812010	79
52985	103.2	35.25	2.1628	11	-0.1	1.8	0	10.5	19812010	71
52985	103.2	35.25	2.1628	12	-5.8	-4.3	0	10.5	19812010	64
56081	103.21	34.42	2.8102	1	-7.6	-6.5	0	10.5	19812010	49	3.725	7.04167	65.1667
56081	103.21	34.42	2.8102	2	-4.9	-2.2	0	10.5	19812010	54
56081	103.21	34.42	2.8102	3	-0.5	3	0	10.5	19812010	60
56081	103.21	34.42	2.8102	4	4.4	8.9	0	10.5	19812010	63
56081	103.21	34.42	2.8102	5	8.4	13.1	0	10.5	19812010	66
56081	103.21	34.42	2.8102	6	11.6	16.3	0	10.5	19812010	73
56081	103.21	34.42	2.8102	7	13.7	18.9	0	10.5	19812010	77
56081	103.21	34.42	2.8102	8	13	17.9	0	10.5	19812010	78
56081	103.21	34.42	2.8102	9	9.5	13	0	10.5	19812010	78
56081	103.21	34.42	2.8102	10	4.5	7	0	10.5	19812010	74
56081	103.21	34.42	2.8102	11	-1.3	0.4	0	10.5	19812010	60
56081	103.21	34.42	2.8102	12	-6.1	-5.3	0	10.5	19812010	50
52981	103.23	35.4	2.428	1	-6.6	-6.7	2	10.5	19812010	53	5.575	8.275	61.6667
52981	103.23	35.4	2.428	2	-4	-2.6	2.2	10.5	19812010	56
52981	103.23	35.4	2.428	3	0.7	3.1	2.6	10.5	19812010	57
52981	103.23	35.4	2.428	4	6.6	10.6	3	10.5	19812010	55
52981	103.23	35.4	2.428	5	11.1	16.1	3	10.5	19812010	58
52981	103.23	35.4	2.428	6	14.4	19.6	2.7	10.5	19812010	65
52981	103.23	35.4	2.428	7	16.5	21.5	2.7	10.5	19812010	70
52981	103.23	35.4	2.428	8	15.6	19.7	2.7	10.5	19812010	72
52981	103.23	35.4	2.428	9	11.3	14.3	2.5	10.5	19812010	75
52981	103.23	35.4	2.428	10	5.8	7.8	2.3	10.5	19812010	72
52981	103.23	35.4	2.428	11	0.3	1.1	2.1	10.5	19812010	56
52981	103.23	35.4	2.428	12	-4.8	-5.2	2	10.5	19812010	51
56082	103.3	34.35	2.5403	1	-6.2	-4.7	0	10.5	19812010	53	5.45833	8.99167	64.3333
56082	103.3	34.35	2.5403	2	-3	-0.4	0	10.5	19812010	55
56082	103.3	34.35	2.5403	3	1.5	4.8	0	10.5	19812010	59
56082	103.3	34.35	2.5403	4	6.3	10.8	0	10.5	19812010	61
56082	103.3	34.35	2.5403	5	10.2	15.2	0	10.5	19812010	64
56082	103.3	34.35	2.5403	6	13.3	18.6	0	10.5	19812010	70
56082	103.3	34.35	2.5403	7	15.6	21	0	10.5	19812010	73
56082	103.3	34.35	2.5403	8	14.9	19.9	0	10.5	19812010	73
56082	103.3	34.35	2.5403	9	11.2	15	0	10.5	19812010	75
56082	103.3	34.35	2.5403	10	6.1	8.9	0	10.5	19812010	73
56082	103.3	34.35	2.5403	11	0.4	2.3	0	10.5	19812010	62
56082	103.3	34.35	2.5403	12	-4.8	-3.5	0	10.5	19812010	54
52982	103.33	35.29	1.9532	1	-6.9	-6.5	0	10.6	19812010	62	6.9	10.2417	68.75
52982	103.33	35.29	1.9532	2	-2.6	-0.9	0	10.6	19812010	60
52982	103.33	35.29	1.9532	3	3	5.8	0	10.6	19812010	61
52982	103.33	35.29	1.9532	4	8.9	13.4	0	10.6	19812010	58
52982	103.33	35.29	1.9532	5	13.3	18.9	0	10.6	19812010	63
52982	103.33	35.29	1.9532	6	16.3	22.3	0	10.6	19812010	71
52982	103.33	35.29	1.9532	7	18.2	24.3	0	10.6	19812010	76
52982	103.33	35.29	1.9532	8	17.3	22.2	0	10.6	19812010	78
52982	103.33	35.29	1.9532	9	12.9	16.6	0	10.6	19812010	81
52982	103.33	35.29	1.9532	10	7.1	9.7	0	10.6	19812010	79
52982	103.33	35.29	1.9532	11	0.7	2	0	10.6	19812010	71
52982	103.33	35.29	1.9532	12	-5.4	-4.9	0	10.6	19812010	65
52988	103.43	35.22	2.0006	1	-7.8	-6.4	0	10.5	19812010	64	6.55	10.075	68.9167
52988	103.43	35.22	2.0006	2	-3.2	-0.7	0	10.5	19812010	62
52988	103.43	35.22	2.0006	3	2.5	5.6	0	10.5	19812010	63
52988	103.43	35.22	2.0006	4	8.4	12.8	0	10.5	19812010	61
52988	103.43	35.22	2.0006	5	12.9	18.4	0	10.5	19812010	64
52988	103.43	35.22	2.0006	6	16	21.9	0	10.5	19812010	70
52988	103.43	35.22	2.0006	7	18.1	23.7	0	10.5	19812010	73
52988	103.43	35.22	2.0006	8	17.3	21.9	0	10.5	19812010	75
52988	103.43	35.22	2.0006	9	13	16.5	0	10.5	19812010	79
52988	103.43	35.22	2.0006	10	7	9.9	0	10.5	19812010	78
52988	103.43	35.22	2.0006	11	0.3	2.1	0	10.5	19812010	72
52988	103.43	35.22	2.0006	12	-5.9	-4.8	0	10.5	19812010	66
52986	103.52	35.22	1.8938	1	-6.6	-5.9	0.9	10.5	19812010	62	7.46667	10.6	67.4167
52986	103.52	35.22	1.8938	2	-2	-0.1	1.3	10.5	19812010	59
52986	103.52	35.22	1.8938	3	3.5	6.5	1.6	10.5	19812010	59
52986	103.52	35.22	1.8938	4	9.3	13.5	1.7	10.5	19812010	59
52986	103.52	35.22	1.8938	5	13.6	18.9	1.5	10.5	19812010	63
52986	103.52	35.22	1.8938	6	16.7	22.3	1.3	10.5	19812010	70
52986	103.52	35.22	1.8938	7	19	24.2	1.2	10.5	19812010	73
52986	103.52	35.22	1.8938	8	18.2	22.4	1.2	10.5	19812010	74
52986	103.52	35.22	1.8938	9	13.8	16.9	1.1	10.5	19812010	78
52986	103.52	35.22	1.8938	10	7.8	10.2	1	10.5	19812010	76
52986	103.52	35.22	1.8938	11	1.2	2.5	0.9	10.5	19812010	71
52986	103.52	35.22	1.8938	12	-4.9	-4.2	0.9	10.5	19812010	65
52889	103.53	36.03	1.5172	1	-4.5	-5.7	0.6	10.5	19812010	52	10.3833	12.425	53.4167
52889	103.53	36.03	1.5172	2	0.1	0.5	0.8	10.5	19812010	47
52889	103.53	36.03	1.5172	3	6.1	8.5	1.1	10.5	19812010	45
52889	103.53	36.03	1.5172	4	12.6	16.5	1.3	10.5	19812010	42
52889	103.53	36.03	1.5172	5	17.4	22.3	1.3	10.5	19812010	46
52889	103.53	36.03	1.5172	6	21.1	26.1	1.3	10.5	19812010	51
52889	103.53	36.03	1.5172	7	23.1	27.8	1.2	10.5	19812010	56
52889	103.53	36.03	1.5172	8	21.7	25.3	1.1	10.5	19812010	60
52889	103.53	36.03	1.5172	9	16.9	19.2	0.8	10.5	19812010	64
52889	103.53	36.03	1.5172	10	10.3	11.4	0.7	10.5	19812010	65
52889	103.53	36.03	1.5172	11	3	2.2	0.6	10.5	19812010	58
52889	103.53	36.03	1.5172	12	-3.2	-5	0.5	10.5	19812010	55
52884	103.57	36.21	1.6685	1	-8.5	-7.5	0	10.5	19812010	53	7.375	11.0667	56.9167
52884	103.57	36.21	1.6685	2	-3.5	-1.4	0	10.5	19812010	47
52884	103.57	36.21	1.6685	3	2.9	6.6	0	10.5	19812010	46
52884	103.57	36.21	1.6685	4	9.8	14.7	0	10.5	19812010	43
52884	103.57	36.21	1.6685	5	14.9	20.8	0	10.5	19812010	51
52884	103.57	36.21	1.6685	6	18.4	25	0	10.5	19812010	59
52884	103.57	36.21	1.6685	7	20.5	26.8	0	10.5	19812010	64
52884	103.57	36.21	1.6685	8	19.3	24.6	0	10.5	19812010	66
52884	103.57	36.21	1.6685	9	14.3	18.4	0	10.5	19812010	69
52884	103.57	36.21	1.6685	10	7.7	10.3	0	10.5	19812010	65
52884	103.57	36.21	1.6685	11	-0.2	1	0	10.5	19812010	62
52884	103.57	36.21	1.6685	12	-7.1	-6.5	0	10.5	19812010	58
56093	104.01	34.26	2.315	1	-6	-4.2	1.1	10.5	19812010	58	6.1	9.14167	68
56093	104.01	34.26	2.315	2	-2.7	-0.1	1.5	10.5	19812010	60
56093	104.01	34.26	2.315	3	2	5	1.9	10.5	19812010	63
56093	104.01	34.26	2.315	4	7	10.6	1.9	10.5	19812010	64
56093	104.01	34.26	2.315	5	11.2	15.4	1.8	10.5	19812010	67
56093	104.01	34.26	2.315	6	14.3	18.6	1.4	10.5	19812010	73
56093	104.01	34.26	2.315	7	16.5	20.8	1.3	10.5	19812010	76
56093	104.01	34.26	2.315	8	15.8	19.7	1.2	10.5	19812010	76
56093	104.01	34.26	2.315	9	12	15.1	1.3	10.5	19812010	77
56093	104.01	34.26	2.315	10	6.9	9.3	1.3	10.5	19812010	75
56093	104.01	34.26	2.315	11	0.9	2.8	1.1	10.5	19812010	67
56093	104.01	34.26	2.315	12	-4.7	-3.3	0.9	10.5	19812010	60
52797	104.03	37.11	1.6309	1	-6.1	-6.2	1.6	10.5	19812010	45	9.05833	11.7667	47.5
52797	104.03	37.11	1.6309	2	-2.3	-0.9	2	10.5	19812010	42
52797	104.03	37.11	1.6309	3	3.9	6.7	2.4	10.5	19812010	40
52797	104.03	37.11	1.6309	4	11	15.1	2.6	10.5	19812010	36
52797	104.03	37.11	1.6309	5	16.4	21.5	2.3	10.5	19812010	41
52797	104.03	37.11	1.6309	6	20.4	26	2.1	10.5	19812010	47
52797	104.03	37.11	1.6309	7	22.3	27.7	1.9	10.5	19812010	53
52797	104.03	37.11	1.6309	8	20.7	25	1.9	10.5	19812010	57
52797	104.03	37.11	1.6309	9	15.9	18.8	1.8	10.5	19812010	58
52797	104.03	37.11	1.6309	10	9.2	10.7	1.7	10.5	19812010	55
52797	104.03	37.11	1.6309	11	1.7	1.9	1.8	10.5	19812010	49
52797	104.03	37.11	1.6309	12	-4.4	-5.1	1.6	10.5	19812010	47
52983	104.09	35.52	1.8744	1	-7.5	-6.3	1.4	10.5	19812010	59	6.95833	10.2917	63
52983	104.09	35.52	1.8744	2	-3.3	-0.9	1.8	10.5	19812010	57
52983	104.09	35.52	1.8744	3	2.5	5.7	2.2	10.5	19812010	57
52983	104.09	35.52	1.8744	4	8.8	13.3	2.4	10.5	19812010	54
52983	104.09	35.52	1.8744	5	13.6	19.1	2.3	10.5	19812010	58
52983	104.09	35.52	1.8744	6	17	22.9	2.1	10.5	19812010	64
52983	104.09	35.52	1.8744	7	19.3	24.5	2.1	10.5	19812010	67
52983	104.09	35.52	1.8744	8	18.2	22.3	2.1	10.5	19812010	69
52983	104.09	35.52	1.8744	9	13.5	16.6	1.9	10.5	19812010	73
52983	104.09	35.52	1.8744	10	7.2	9.6	1.8	10.5	19812010	71
52983	104.09	35.52	1.8744	11	0.2	1.8	1.6	10.5	19812010	65
52983	104.09	35.52	1.8744	12	-6	-5.1	1.4	10.5	19812010	62
52896	104.09	36.33	1.7387	1	-6.2	-6.5	1.1	10.5	19812010	50	8.875	11.5333	50.1667
52896	104.09	36.33	1.7387	2	-2	-0.8	1.5	10.5	19812010	45
52896	104.09	36.33	1.7387	3	3.9	6.8	1.9	10.5	19812010	43
52896	104.09	36.33	1.7387	4	10.8	14.9	2.3	10.5	19812010	40
52896	104.09	36.33	1.7387	5	16.1	21.3	2.2	10.5	19812010	42
52896	104.09	36.33	1.7387	6	20.1	25.7	2.1	10.5	19812010	47
52896	104.09	36.33	1.7387	7	22	27.3	1.9	10.5	19812010	54
52896	104.09	36.33	1.7387	8	20.5	24.6	1.8	10.5	19812010	58
52896	104.09	36.33	1.7387	9	15.6	18.5	1.5	10.5	19812010	61
52896	104.09	36.33	1.7387	10	9	10.8	1.4	10.5	19812010	59
52896	104.09	36.33	1.7387	11	1.5	1.5	1.3	10.5	19812010	52
52896	104.09	36.33	1.7387	12	-4.8	-5.7	1.2	10.5	19812010	51
52998	104.12	35.08	2.111	1	-6.9	-5.9	0	10.5	19812010	61	6.1	9.38333	68.3333
52998	104.12	35.08	2.111	2	-3.6	-1.4	0	10.5	19812010	63
52998	104.12	35.08	2.111	3	1.4	4.7	0	10.5	19812010	65
52998	104.12	35.08	2.111	4	7.4	11.6	0	10.5	19812010	61
52998	104.12	35.08	2.111	5	12.1	17.2	0	10.5	19812010	63
52998	104.12	35.08	2.111	6	15.3	20.8	0	10.5	19812010	70
52998	104.12	35.08	2.111	7	17.4	22.8	0	10.5	19812010	74
52998	104.12	35.08	2.111	8	16.4	20.7	0	10.5	19812010	76
52998	104.12	35.08	2.111	9	12.1	15.4	0	10.5	19812010	79
52998	104.12	35.08	2.111	10	6.5	8.8	0	10.5	19812010	78
52998	104.12	35.08	2.111	11	0.3	2.1	0	10.5	19812010	69
52998	104.12	35.08	2.111	12	-5.2	-4.2	0	10.5	19812010	61
56097	104.14	33.16	1.4068	1	2.5	3.3	0	10.6	19812010	55	13.0583	15.1083	64.3333
56097	104.14	33.16	1.4068	2	5.2	7.3	0	10.6	19812010	55
56097	104.14	33.16	1.4068	3	9.2	11.8	0	10.6	19812010	58
56097	104.14	33.16	1.4068	4	13.9	16.5	0	10.6	19812010	61
56097	104.14	33.16	1.4068	5	17.5	20.1	0	10.6	19812010	65
56097	104.14	33.16	1.4068	6	20.2	22.9	0	10.6	19812010	69
56097	104.14	33.16	1.4068	7	22.7	26.1	0	10.6	19812010	70
56097	104.14	33.16	1.4068	8	22	25.1	0	10.6	19812010	71
56097	104.14	33.16	1.4068	9	18.1	20.2	0	10.6	19812010	74
56097	104.14	33.16	1.4068	10	13.5	14.9	0	10.6	19812010	73
56097	104.14	33.16	1.4068	11	8.5	9.4	0	10.6	19812010	64
56097	104.14	33.16	1.4068	12	3.4	3.7	0	10.6	19812010	57
56094	104.22	33.47	1.4	1	2	2.6	0	10.5	19812010	53	13.425	15.9167	59.8333
56094	104.22	33.47	1.4	2	5.1	7.1	0	10.5	19812010	52
56094	104.22	33.47	1.4	3	9.4	12.2	0	10.5	19812010	54
56094	104.22	33.47	1.4	4	14.4	17.9	0	10.5	19812010	55
56094	104.22	33.47	1.4	5	18.4	22.4	0	10.5	19812010	58
56094	104.22	33.47	1.4	6	21.5	25.5	0	10.5	19812010	61
56094	104.22	33.47	1.4	7	23.8	28.1	0	10.5	19812010	63
56094	104.22	33.47	1.4	8	22.8	26.9	0	10.5	19812010	66
56094	104.22	33.47	1.4	9	18.6	21.2	0	10.5	19812010	70
56094	104.22	33.47	1.4	10	13.7	15.1	0	10.5	19812010	70
56094	104.22	33.47	1.4	11	8.4	9	0	10.5	19812010	61
56094	104.22	33.47	1.4	12	3	3	0	10.5	19812010	55
56095	104.23	34.02	1.7532	5	14.6	19.1	0	10.5	19812010	65	9.75	13.0333	65.6667
56095	104.23	34.02	1.7532	6	17.7	22.3	0	10.5	19812010	69
56095	104.23	34.02	1.7532	7	20.3	25.1	0	10.5	19812010	70
56095	104.23	34.02	1.7532	8	19.5	23.8	0	10.5	19812010	72
56095	104.23	34.02	1.7532	9	15.3	18.3	0	10.5	19812010	75
56095	104.23	34.02	1.7532	10	10.3	12.5	0	10.5	19812010	74
56095	104.23	34.02	1.7532	11	4.7	6.5	0	10.5	19812010	67
56095	104.23	34.02	1.7532	12	-0.8	0.7	0	10.5	19812010	59
56095	104.23	34.02	1.7532	1	-1.8	0.1	0	10.5	19812010	57
56095	104.23	34.02	1.7532	2	1.1	4.3	0	10.5	19812010	58
56095	104.23	34.02	1.7532	3	5.5	9.2	0	10.5	19812010	61
56095	104.23	34.02	1.7532	4	10.6	14.5	0	10.5	19812010	61
56091	104.28	34.51	1.8833	1	-5.3	-4.2	0	10.5	19812010	60	7.76667	10.9917	66.5
56091	104.28	34.51	1.8833	2	-1.8	0.2	0	10.5	19812010	61
56091	104.28	34.51	1.8833	3	3.2	6.6	0	10.5	19812010	63
56091	104.28	34.51	1.8833	4	9	13	0	10.5	19812010	61
56091	104.28	34.51	1.8833	5	13.5	18.5	0	10.5	19812010	63
56091	104.28	34.51	1.8833	6	16.9	22.3	0	10.5	19812010	67
56091	104.28	34.51	1.8833	7	19.3	24.5	0	10.5	19812010	70
56091	104.28	34.51	1.8833	8	18.4	22.8	0	10.5	19812010	71
56091	104.28	34.51	1.8833	9	13.9	17.1	0	10.5	19812010	75
56091	104.28	34.51	1.8833	10	8.1	10.6	0	10.5	19812010	76
56091	104.28	34.51	1.8833	11	1.8	3.5	0	10.5	19812010	69
56091	104.28	34.51	1.8833	12	-3.8	-3	0	10.5	19812010	62
52995	104.37	35.35	1.8972	5	13.6	18.6	2.3	10.5	19812010	56	7.23333	10.1667	63.1667
52995	104.37	35.35	1.8972	6	17.1	22.2	2.1	10.5	19812010	63
52995	104.37	35.35	1.8972	7	19.3	24.1	2.1	10.5	19812010	67
52995	104.37	35.35	1.8972	8	18.3	21.9	2	10.5	19812010	70
52995	104.37	35.35	1.8972	1	-6.9	-6	1.4	10.5	19812010	61
52995	104.37	35.35	1.8972	2	-2.9	-0.9	1.8	10.5	19812010	59
52995	104.37	35.35	1.8972	3	2.5	5.5	2	10.5	19812010	58
52995	104.37	35.35	1.8972	4	8.7	12.8	2.3	10.5	19812010	55
52995	104.37	35.35	1.8972	9	13.7	16.4	1.9	10.5	19812010	72
52995	104.37	35.35	1.8972	10	7.5	9.5	1.6	10.5	19812010	72
52995	104.37	35.35	1.8972	11	0.9	2.2	1.6	10.5	19812010	65
52995	104.37	35.35	1.8972	12	-5	-4.3	1.5	10.5	19812010	60
56092	104.39	35	1.7282	1	-5.5	-4.9	0	10.5	19812010	63	8.15833	11.2833	67.8333
56092	104.39	35	1.7282	2	-1.6	0.1	0	10.5	19812010	63
56092	104.39	35	1.7282	3	3.6	6.6	0	10.5	19812010	63
56092	104.39	35	1.7282	4	9.7	13.8	0	10.5	19812010	60
56092	104.39	35	1.7282	5	14.3	19.5	0	10.5	19812010	62
56092	104.39	35	1.7282	6	17.7	23.4	0	10.5	19812010	67
56092	104.39	35	1.7282	7	20.2	25.6	0	10.5	19812010	69
56092	104.39	35	1.7282	8	19	23.5	0	10.5	19812010	73
56092	104.39	35	1.7282	9	14.4	17.7	0	10.5	19812010	77
56092	104.39	35	1.7282	10	8.4	10.7	0	10.5	19812010	79
56092	104.39	35	1.7282	11	1.7	3.1	0	10.5	19812010	73
56092	104.39	35	1.7282	12	-4	-3.7	0	10.5	19812010	65
52895	104.41	36.34	1.3982	1	-6.5	-6.6	0.6	10.5	19812010	58	9.425	12.3417	58.25
52895	104.41	36.34	1.3982	2	-1.5	-0.6	1.1	10.5	19812010	52
52895	104.41	36.34	1.3982	3	5	7.7	1.6	10.5	19812010	49
52895	104.41	36.34	1.3982	4	11.8	16	1.8	10.5	19812010	45
52895	104.41	36.34	1.3982	5	17	22.2	1.6	10.5	19812010	50
52895	104.41	36.34	1.3982	6	20.8	26.7	1.6	10.5	19812010	55
52895	104.41	36.34	1.3982	7	22.8	28.5	1.5	10.5	19812010	61
52895	104.41	36.34	1.3982	8	21.2	26	1.3	10.5	19812010	66
52895	104.41	36.34	1.3982	9	16.3	19.8	1.1	10.5	19812010	69
52895	104.41	36.34	1.3982	10	9.5	11.6	0.9	10.5	19812010	68
52895	104.41	36.34	1.3982	11	1.6	2.1	0.7	10.5	19812010	64
52895	104.41	36.34	1.3982	12	-4.9	-5.3	0.6	10.5	19812010	62
52495	104.48	40.1	1.3239	1	-10.9	-10.5	2.6	10.5	19932010	52	7.875	10.7167	39.8333
52495	104.48	40.1	1.3239	2	-5.8	-4.6	3	10.5	19932010	42
52495	104.48	40.1	1.3239	3	1.2	3.6	3.8	10.5	19932010	32
52495	104.48	40.1	1.3239	4	9.8	13.6	4.2	10.5	19932010	25
52495	104.48	40.1	1.3239	5	17.1	22.2	4.4	10.5	19932010	26
52495	104.48	40.1	1.3239	6	22.6	28.3	4	10.5	19932010	32
52495	104.48	40.1	1.3239	7	24.7	30.1	3.7	10.5	19932010	41
52495	104.48	40.1	1.3239	8	22.3	26.9	3.4	10.5	19932010	45
52495	104.48	40.1	1.3239	9	16.2	19.3	3	10.5	19932010	46
52495	104.48	40.1	1.3239	10	7.8	9.7	2.8	10.5	19932010	40
52495	104.48	40.1	1.3239	11	-1.5	-1	3.1	10.5	19932010	45
52495	104.48	40.1	1.3239	12	-9	-9	2.9	10.5	19932010	52
52495	104.48	40.1	1.3239	1	-10.3	-10.2	3.2	10.5	119811992	48	7.4	10.125	35.3333
52495	104.48	40.1	1.3239	2	-7.3	-6	3.3	10.5	119811992	38
52495	104.48	40.1	1.3239	3	0	2.6	3.8	10.5	119811992	29
52495	104.48	40.1	1.3239	4	9.1	13	4.5	10.5	119811992	21
52495	104.48	40.1	1.3239	5	16.8	21.8	4.5	10.5	119811992	24
52495	104.48	40.1	1.3239	6	21.9	27.1	4.2	10.5	119811992	28
52495	104.48	40.1	1.3239	7	24.5	29.6	3.9	10.5	119811992	35
52495	104.48	40.1	1.3239	8	21.9	26.2	3.6	10.5	119811992	41
52495	104.48	40.1	1.3239	9	16	19.1	3.5	10.5	119811992	35
52495	104.48	40.1	1.3239	10	7.4	9.2	3.4	10.5	119811992	36
52495	104.48	40.1	1.3239	11	-2.3	-1.9	3.5	10.5	119811992	40
52495	104.48	40.1	1.3239	12	-8.9	-9	3.4	10.5	119811992	49
57004	104.53	34.44	1.4954	1	-3.2	-2.5	0	10.5	19812010	60	9.925	12.4417	65.9167
57004	104.53	34.44	1.4954	2	0.3	1.8	0	10.5	19812010	61
57004	104.53	34.44	1.4954	3	5.3	7.7	0	10.5	19812010	61
57004	104.53	34.44	1.4954	4	11.3	14.7	0	10.5	19812010	60
57004	104.53	34.44	1.4954	5	15.9	20.4	0	10.5	19812010	62
57004	104.53	34.44	1.4954	6	19.4	24	0	10.5	19812010	65
57004	104.53	34.44	1.4954	7	21.8	26.3	0	10.5	19812010	67
57004	104.53	34.44	1.4954	8	20.6	24.3	0	10.5	19812010	71
57004	104.53	34.44	1.4954	9	15.9	18.5	0	10.5	19812010	75
57004	104.53	34.44	1.4954	10	10	11.4	0	10.5	19812010	77
57004	104.53	34.44	1.4954	11	3.7	4.4	0	10.5	19812010	70
57004	104.53	34.44	1.4954	12	-1.9	-1.7	0	10.5	19812010	62
56096	104.55	33.24	1.0791	1	3.7	3.4	1.1	10.5	19812010	51	14.9417	16.4417	57.5
56096	104.55	33.24	1.0791	2	6.5	7.7	1.5	10.5	19812010	50
56096	104.55	33.24	1.0791	3	10.7	12.8	1.7	10.5	19812010	51
56096	104.55	33.24	1.0791	4	16	18.5	1.9	10.5	19812010	52
56096	104.55	33.24	1.0791	5	20.2	23.1	1.8	10.5	19812010	54
56096	104.55	33.24	1.0791	6	23.1	26.2	1.7	10.5	19812010	59
56096	104.55	33.24	1.0791	7	25.2	28.3	1.7	10.5	19812010	62
56096	104.55	33.24	1.0791	8	24.3	26.9	1.6	10.5	19812010	64
56096	104.55	33.24	1.0791	9	19.9	21.3	1.3	10.5	19812010	69
56096	104.55	33.24	1.0791	10	15.1	15.7	1.1	10.5	19812010	67
56096	104.55	33.24	1.0791	11	10	9.7	1.1	10.5	19812010	58
56096	104.55	33.24	1.0791	12	4.6	3.7	1.1	10.5	19812010	53
52996	105.01	35.23	2.4506	1	-8.1	-6.9	3.9	10.5	19812010	63	3.91667	6.80833	69.9167
52996	105.01	35.23	2.4506	2	-6	-3.5	4.4	10.5	19812010	68
52996	105.01	35.23	2.4506	3	-1.5	1.5	5	10.5	19812010	68
52996	105.01	35.23	2.4506	4	4.5	8.2	5.5	10.5	19812010	64
52996	105.01	35.23	2.4506	5	9.4	13.8	5.5	10.5	19812010	64
52996	105.01	35.23	2.4506	6	13	17.5	5	10.5	19812010	70
52996	105.01	35.23	2.4506	7	15.1	19.5	4.9	10.5	19812010	77
52996	105.01	35.23	2.4506	8	14	17.7	5	10.5	19812010	80
52996	105.01	35.23	2.4506	9	9.8	12.4	4.8	10.5	19812010	81
52996	105.01	35.23	2.4506	10	4.2	6.2	4.6	10.5	19812010	79
52996	105.01	35.23	2.4506	11	-1.3	0.4	4.3	10.5	19812010	66
52996	105.01	35.23	2.4506	12	-6.1	-5.1	4.1	10.5	19812010	59
52993	105.04	35.41	1.7394	5	12.6	17	3.4	10.5	119811994	56	7.00833	9.46667	62.5
52993	105.04	35.41	1.7394	6	16	20.5	3.1	10.5	119811994	65
52993	105.04	35.41	1.7394	7	18.4	22.8	2.8	10.5	119811994	67
52993	105.04	35.41	1.7394	8	17.3	21	2.9	10.5	119811994	70
52993	105.04	35.41	1.7394	9	12.7	15.1	2.6	10.5	119811994	71
52993	105.04	35.41	1.7394	10	6.7	8.3	2.5	10.5	119811994	70
52993	105.04	35.41	1.7394	11	0.8	1.4	2.3	10.5	119811994	61
52993	105.04	35.41	1.7394	12	-4.7	-4.9	2.2	10.5	119811994	58
52993	105.04	35.41	1.7394	1	-6.7	-6	0	10.5	19952010	64
52993	105.04	35.41	1.7394	2	-2.2	-0.8	0	10.5	19952010	61
52993	105.04	35.41	1.7394	3	3.5	6	0	10.5	19952010	56
52993	105.04	35.41	1.7394	4	9.7	13.2	0	10.5	19952010	51
52993	105.04	35.41	1.7394	5	14.9	19.3	0	10.5	19952010	52	7.58333	9.88333	62.75
52993	105.04	35.41	1.7394	6	18.7	23.4	0	10.5	19952010	57
52993	105.04	35.41	1.7394	7	20.7	24.6	0	10.5	19952010	66
52993	105.04	35.41	1.7394	8	19.2	22.3	0	10.5	19952010	69
52993	105.04	35.41	1.7394	9	14.6	16.8	0	10.5	19952010	73
52993	105.04	35.41	1.7394	10	8.4	9.9	0	10.5	19952010	73
52993	105.04	35.41	1.7394	11	1	1.9	0	10.5	19952010	67
52993	105.04	35.41	1.7394	12	-5.1	-4.7	0	10.5	19952010	61
52993	105.04	35.41	1.7394	1	-6.4	-6.9	2	10.5	119811994	59
52993	105.04	35.41	1.7394	2	-3.8	-2.4	2.7	10.5	119811994	59
52993	105.04	35.41	1.7394	3	1.1	3.3	3.2	10.5	119811994	61
52993	105.04	35.41	1.7394	4	7.7	11.1	3.5	10.5	119811994	56
57007	105.11	34.11	1.4046	1	-2.3	-1.4	0	10.5	19812010	66	10.2583	13.0667	70.5833
57007	105.11	34.11	1.4046	2	1	2.9	0	10.5	19812010	65
57007	105.11	34.11	1.4046	3	5.7	8.4	0	10.5	19812010	66
57007	105.11	34.11	1.4046	4	11.4	15.1	0	10.5	19812010	65
57007	105.11	34.11	1.4046	5	15.8	20.6	0	10.5	19812010	67
57007	105.11	34.11	1.4046	6	19.3	24	0	10.5	19812010	70
57007	105.11	34.11	1.4046	7	21.7	26.3	0	10.5	19812010	72
57007	105.11	34.11	1.4046	8	20.7	25	0	10.5	19812010	74
57007	105.11	34.11	1.4046	9	16.1	18.7	0	10.5	19812010	79
57007	105.11	34.11	1.4046	10	10.6	12.4	0	10.5	19812010	79
57007	105.11	34.11	1.4046	11	4.3	5.5	0	10.5	19812010	75
57007	105.11	34.11	1.4046	12	-1.2	-0.7	0	10.5	19812010	69
53704	105.11	37.32	1.2257	1	-7.2	-6.6	1.9	10.3	19812010	52	9.20833	11.8167	55.4167
53704	105.11	37.32	1.2257	2	-2.6	-1.5	2.4	10.3	19812010	47
53704	105.11	37.32	1.2257	3	4.2	5.9	2.8	10.3	19812010	45
53704	105.11	37.32	1.2257	4	11.8	14.7	3	10.3	19812010	41
53704	105.11	37.32	1.2257	5	17.1	21.9	2.8	10.3	19812010	49
53704	105.11	37.32	1.2257	6	20.9	26.5	2.6	10.3	19812010	57
53704	105.11	37.32	1.2257	7	22.9	28.3	2.4	10.3	19812010	63
53704	105.11	37.32	1.2257	8	21	25.4	2.3	10.3	19812010	68
53704	105.11	37.32	1.2257	9	16	19.1	2.1	10.3	19812010	68
53704	105.11	37.32	1.2257	10	9.5	11	2	10.3	19812010	60
53704	105.11	37.32	1.2257	11	1.8	1.9	2.1	10.3	19812010	59
53704	105.11	37.32	1.2257	12	-4.9	-4.8	2.1	10.3	19812010	56
53908	105.14	35.13	1.7682	1	-6.7	-5.6	0	10.5	19812010	67	7.175	10.15	69.8333
53908	105.14	35.13	1.7682	2	-3	-1.2	0	10.5	19812010	66
53908	105.14	35.13	1.7682	3	2.3	5.1	0	10.5	19812010	66
53908	105.14	35.13	1.7682	4	8.6	12.8	0	10.5	19812010	62
53908	105.14	35.13	1.7682	5	13.6	18.7	0	10.5	19812010	62
53908	105.14	35.13	1.7682	6	17.1	22.4	0	10.5	19812010	68
53908	105.14	35.13	1.7682	7	19.4	24.3	0	10.5	19812010	72
53908	105.14	35.13	1.7682	8	18.3	22.1	0	10.5	19812010	75
53908	105.14	35.13	1.7682	9	13.6	16.2	0	10.5	19812010	79
53908	105.14	35.13	1.7682	10	7.5	9.5	0	10.5	19812010	79
53908	105.14	35.13	1.7682	11	0.7	2.1	0	10.5	19812010	74
53908	105.14	35.13	1.7682	12	-5.3	-4.6	0	10.5	19812010	68
53707	105.15	36.56	1.6979	1	-8.8	-7.9	3.1	10.2	19812010	51	7.275	10.1917	51.1667
53707	105.15	36.56	1.6979	2	-4.5	-2.6	3.3	10.2	19812010	47
53707	105.15	36.56	1.6979	3	1.9	4.8	3.5	10.2	19812010	43
53707	105.15	36.56	1.6979	4	9.2	13.1	3.7	10.2	19812010	40
53707	105.15	36.56	1.6979	5	15.1	19.9	3.7	10.2	19812010	43
53707	105.15	36.56	1.6979	6	19.3	24.7	3.4	10.2	19812010	48
53707	105.15	36.56	1.6979	7	21.3	26.3	3.2	10.2	19812010	56
53707	105.15	36.56	1.6979	8	19.5	23.5	3.1	10.2	19812010	61
53707	105.15	36.56	1.6979	9	14.5	17.5	3	10.2	19812010	62
53707	105.15	36.56	1.6979	10	7.5	9.4	3	10.2	19812010	59
53707	105.15	36.56	1.6979	11	-0.7	0.3	3.2	10.2	19812010	53
53707	105.15	36.56	1.6979	12	-7	-6.7	3.2	10.2	19812010	51
57008	105.18	34.02	1.579	1	-3.2	-2	0	10.7	19812010	69	9.14167	11.8083	72.75
57008	105.18	34.02	1.579	2	-0.1	1.7	0	10.7	19812010	69
57008	105.18	34.02	1.579	3	4.3	6.9	0	10.7	19812010	69
57008	105.18	34.02	1.579	4	10.1	13.5	0	10.7	19812010	66
57008	105.18	34.02	1.579	5	14.7	18.8	0	10.7	19812010	68
57008	105.18	34.02	1.579	6	18	22.2	0	10.7	19812010	73
57008	105.18	34.02	1.579	7	20.3	24.5	0	10.7	19812010	75
57008	105.18	34.02	1.579	8	19.4	23.2	0	10.7	19812010	77
57008	105.18	34.02	1.579	9	15	17.4	0	10.7	19812010	81
57008	105.18	34.02	1.579	10	9.5	11.3	0	10.7	19812010	80
57008	105.18	34.02	1.579	11	3.6	5	0	10.7	19812010	76
57008	105.18	34.02	1.579	12	-1.9	-0.8	0	10.7	19812010	70
57001	105.2	34.45	1.2719	1	-2.6	-2	0	10.5	19812010	65	10.675	13.5083	68.3333
57001	105.2	34.45	1.2719	2	1.2	2.8	0	10.5	19812010	63
57001	105.2	34.45	1.2719	3	6.3	8.9	0	10.5	19812010	61
57001	105.2	34.45	1.2719	4	12.1	16.3	0	10.5	19812010	61
57001	105.2	34.45	1.2719	5	16.6	21.8	0	10.5	19812010	64
57001	105.2	34.45	1.2719	6	20.3	25.2	0	10.5	19812010	67
57001	105.2	34.45	1.2719	7	22.8	27.4	0	10.5	19812010	68
57001	105.2	34.45	1.2719	8	21.3	25.4	0	10.5	19812010	73
57001	105.2	34.45	1.2719	9	16.5	19.3	0	10.5	19812010	78
57001	105.2	34.45	1.2719	10	10.7	12.6	0	10.5	19812010	78
57001	105.2	34.45	1.2719	11	4.2	5.4	0	10.5	19812010	74
57001	105.2	34.45	1.2719	12	-1.3	-1	0	10.5	19812010	68
53505	105.24	37.53	1.3807	1	-10.2	-9	3.4	10.5	19812001	48	8.375	12.1333	40.6667
53505	105.24	37.53	1.3807	2	-5.8	-3.7	3.2	10.5	19812001	39
53505	105.24	37.53	1.3807	3	1.9	5.2	3.7	10.5	19812001	33
53505	105.24	37.53	1.3807	4	10.7	15.5	4.3	10.5	19812001	27
53505	105.24	37.53	1.3807	9	16.8	21	3.5	10.5	19812001	47
53505	105.24	37.53	1.3807	10	8.3	11.2	3.4	10.5	19812001	44
53505	105.24	37.53	1.3807	11	-1.1	0.3	3.7	10.5	19812001	45
53505	105.24	37.53	1.3807	12	-8.4	-7.6	3.5	10.5	19812001	50
53505	105.24	37.53	1.3807	5	17.7	23.9	4.7	10.5	19812001	29
53505	105.24	37.53	1.3807	6	22.7	29.3	4.5	10.5	19812001	35
53505	105.24	37.53	1.3807	7	25.1	31.4	4.4	10.5	19812001	43
53505	105.24	37.53	1.3807	8	22.8	28.1	4	10.5	19812001	48
57105	105.36	33.2	1.2212	1	-0.2	0.7	0	10.7	19812010	71	11.025	13.275	76.0833
57105	105.36	33.2	1.2212	2	2.2	3.5	0	10.7	19812010	71
57105	105.36	33.2	1.2212	3	6.4	8	0	10.7	19812010	71
57105	105.36	33.2	1.2212	4	11.9	14.2	0	10.7	19812010	70
57105	105.36	33.2	1.2212	5	16.1	19.7	0	10.7	19812010	73
57105	105.36	33.2	1.2212	6	19.3	23.3	0	10.7	19812010	77
57105	105.36	33.2	1.2212	7	21.4	25.3	0	10.7	19812010	80
57105	105.36	33.2	1.2212	8	20.6	24.1	0	10.7	19812010	82
57105	105.36	33.2	1.2212	9	16.3	18.6	0	10.7	19812010	85
57105	105.36	33.2	1.2212	10	11.3	13	0	10.7	19812010	84
57105	105.36	33.2	1.2212	11	6	7.1	0	10.7	19812010	77
57105	105.36	33.2	1.2212	12	1	1.8	0	10.7	19812010	72
57002	105.39	34.51	1.2161	1	-2.6	-3	0.5	10.6	19812010	65	10.9	13.1083	66.4167
57002	105.39	34.51	1.2161	2	1.2	2.1	0.9	10.6	19812010	62
57002	105.39	34.51	1.2161	3	6.3	8.4	1.3	10.6	19812010	60
57002	105.39	34.51	1.2161	4	12.5	15.9	1.4	10.6	19812010	57
57002	105.39	34.51	1.2161	5	17.2	21.6	1.2	10.6	19812010	59
57002	105.39	34.51	1.2161	6	20.8	25.3	1.2	10.6	19812010	64
57002	105.39	34.51	1.2161	7	23.1	27.4	1.3	10.6	19812010	67
57002	105.39	34.51	1.2161	8	21.8	25.3	1.1	10.6	19812010	71
57002	105.39	34.51	1.2161	9	16.9	19.1	0.8	10.6	19812010	76
57002	105.39	34.51	1.2161	10	10.8	12.2	0.8	10.6	19812010	77
57002	105.39	34.51	1.2161	11	4.2	4.8	0.7	10.6	19812010	72
57002	105.39	34.51	1.2161	12	-1.4	-1.8	0.5	10.6	19812010	67
53806	105.39	36.34	1.8542	1	-6.2	-7.3	2.4	10	19812010	49	7.725	9.39167	51.4167
53806	105.39	36.34	1.8542	2	-3.2	-2.8	2.8	10	19812010	48
53806	105.39	36.34	1.8542	3	2.3	4	3.3	10	19812010	46
53806	105.39	36.34	1.8542	4	9.1	12	3.7	10	19812010	41
53806	105.39	36.34	1.8542	5	14.5	18.4	3.6	10	19812010	45
53806	105.39	36.34	1.8542	6	18.5	23	3.3	10	19812010	50
53806	105.39	36.34	1.8542	7	20.3	24.4	2.9	10	19812010	58
53806	105.39	36.34	1.8542	8	18.6	21.7	2.8	10	19812010	63
53806	105.39	36.34	1.8542	9	14	15.9	2.7	10	19812010	64
53806	105.39	36.34	1.8542	10	7.8	8.4	2.6	10	19812010	59
53806	105.39	36.34	1.8542	11	1.3	0.7	2.7	10	19812010	48
53806	105.39	36.34	1.8542	12	-4.3	-5.7	2.7	10	19812010	46
53602	105.4	38.5	1.5614	1	-7.7	-8.7	2.1	10	19812010	43	8.69167	10.4917	39
53602	105.4	38.5	1.5614	2	-3.8	-3.3	2.5	10	19812010	38
53602	105.4	38.5	1.5614	3	2.7	4.8	2.8	10	19812010	33
53602	105.4	38.5	1.5614	4	10.3	13.5	3.2	10	19812010	28
53602	105.4	38.5	1.5614	5	16.7	21	3.4	10	19812010	31
53602	105.4	38.5	1.5614	6	21.5	26.3	3.3	10	19812010	35
53602	105.4	38.5	1.5614	7	23.5	27.6	3.2	10	19812010	43
53602	105.4	38.5	1.5614	8	21.5	24.8	3	10	19812010	47
53602	105.4	38.5	1.5614	9	16.2	18.2	2.8	10	19812010	46
53602	105.4	38.5	1.5614	10	8.9	9.6	2.5	10	19812010	41
53602	105.4	38.5	1.5614	11	0.5	-0.3	2.4	10	19812010	40
53602	105.4	38.5	1.5614	12	-6	-7.6	2.1	10	19812010	43
53705	105.41	37.29	1.1834	9	16.9	20	2.6	10.3	19812010	65	9.90833	12.675	52.4167
53705	105.41	37.29	1.1834	10	10	11.7	2.5	10.3	19812010	60
53705	105.41	37.29	1.1834	11	2.2	2.5	2.7	10.3	19812010	57
53705	105.41	37.29	1.1834	12	-4.4	-4.5	2.9	10.3	19812010	51
53705	105.41	37.29	1.1834	1	-6.4	-5.9	2.9	10.3	19812010	48
53705	105.41	37.29	1.1834	2	-1.9	-0.8	3.1	10.3	19812010	44
53705	105.41	37.29	1.1834	3	4.8	7.1	3.5	10.3	19812010	42
53705	105.41	37.29	1.1834	4	12.4	15.8	3.7	10.3	19812010	39
53705	105.41	37.29	1.1834	5	17.8	22.8	3.4	10.3	19812010	46
53705	105.41	37.29	1.1834	6	21.8	27.7	3.2	10.3	19812010	53
53705	105.41	37.29	1.1834	7	23.8	29.3	3.1	10.3	19812010	60
53705	105.41	37.29	1.1834	8	21.9	26.4	2.8	10.3	19812010	64
57102	105.43	33.45	0.97	1	-0.2	0.9	0	10.5	19812010	71	12.0083	14.7833	74.9167
57102	105.43	33.45	0.97	2	3	4.8	0	10.5	19812010	69
57102	105.43	33.45	0.97	3	7.4	9.9	0	10.5	19812010	69
57102	105.43	33.45	0.97	4	12.9	16.6	0	10.5	19812010	69
57102	105.43	33.45	0.97	5	17.3	21.9	0	10.5	19812010	72
57102	105.43	33.45	0.97	6	21	25.5	0	10.5	19812010	73
57102	105.43	33.45	0.97	7	23.4	27.8	0	10.5	19812010	76
57102	105.43	33.45	0.97	8	22.3	26.2	0	10.5	19812010	79
57102	105.43	33.45	0.97	9	17.7	20.3	0	10.5	19812010	84
57102	105.43	33.45	0.97	10	12.3	14.1	0	10.5	19812010	84
57102	105.43	33.45	0.97	11	6.2	7.6	0	10.5	19812010	79
57102	105.43	33.45	0.97	12	0.8	1.8	0	10.5	19812010	74
53906	105.43	35.31	1.6581	1	-6	-5.2	2	10.5	19812010	61	7.80833	10.525	65.5833
53906	105.43	35.31	1.6581	2	-2.3	-0.8	2.2	10.5	19812010	60
53906	105.43	35.31	1.6581	3	3	5.4	2.4	10.5	19812010	59
53906	105.43	35.31	1.6581	4	9.2	13	2.5	10.5	19812010	57
53906	105.43	35.31	1.6581	5	14	18.9	2.4	10.5	19812010	60
53906	105.43	35.31	1.6581	6	17.6	22.8	2	10.5	19812010	67
53906	105.43	35.31	1.6581	7	20	24.7	2.1	10.5	19812010	70
53906	105.43	35.31	1.6581	8	18.9	22.6	2.1	10.5	19812010	73
53906	105.43	35.31	1.6581	9	14.2	16.6	1.9	10.5	19812010	75
53906	105.43	35.31	1.6581	10	8	9.7	1.8	10.5	19812010	75
53906	105.43	35.31	1.6581	11	1.4	2.4	1.9	10.5	19812010	68
53906	105.43	35.31	1.6581	12	-4.3	-3.8	1.8	10.5	19812010	62
53903	105.43	35.58	1.9165	9	12.4	15.2	1.8	12	19812010	76	5.825	9.01667	65.4167
53903	105.43	35.58	1.9165	10	6.2	8.3	1.7	12	19812010	74
53903	105.43	35.58	1.9165	11	-0.8	1.1	1.8	12	19812010	67
53903	105.43	35.58	1.9165	12	-6.7	-5.3	1.8	12	19812010	63
53903	105.43	35.58	1.9165	1	-8.5	-6.6	1.8	12	19812010	63
53903	105.43	35.58	1.9165	2	-4.8	-2.3	1.9	12	19812010	62
53903	105.43	35.58	1.9165	3	0.8	3.8	2.2	12	19812010	59
53903	105.43	35.58	1.9165	4	7.2	11.3	2.5	12	19812010	55
53903	105.43	35.58	1.9165	5	12.5	17.2	2.5	12	19812010	57
53903	105.43	35.58	1.9165	6	16.2	21.5	2.1	12	19812010	64
53903	105.43	35.58	1.9165	7	18.3	23.1	2	12	19812010	71
53903	105.43	35.58	1.9165	8	17.1	20.9	2	12	19812010	74
57006	105.45	34.35	1.1416	9	17.2	19.1	1	10.5	19812010	76	11.4417	13.5	65.5
57006	105.45	34.35	1.1416	10	11.3	12.5	0.8	10.5	19812010	76
57006	105.45	34.35	1.1416	11	5.1	5.6	0.9	10.5	19812010	70
57006	105.45	34.35	1.1416	12	-0.4	-0.2	0.9	10.5	19812010	64
57006	105.45	34.35	1.1416	1	-1.5	-0.9	1	10.5	19812010	61
57006	105.45	34.35	1.1416	2	1.9	3.2	1.3	10.5	19812010	60
57006	105.45	34.35	1.1416	3	6.9	8.9	1.3	10.5	19812010	59
57006	105.45	34.35	1.1416	4	13	16	1.3	10.5	19812010	57
57006	105.45	34.35	1.1416	5	17.5	21.2	1.3	10.5	19812010	60
57006	105.45	34.35	1.1416	6	21.1	24.8	1.2	10.5	19812010	64
57006	105.45	34.35	1.1416	7	23.2	26.7	1.2	10.5	19812010	68
57006	105.45	34.35	1.1416	8	22	25.1	1.2	10.5	19812010	71
53502	105.45	39.47	1.0318	1	-9.4	-9.2	2.7	10.5	19812010	47	9.425	12.2167	39.3333
53502	105.45	39.47	1.0318	2	-4.7	-3.7	2.8	10.5	19812010	40
53502	105.45	39.47	1.0318	3	2.8	5.1	3.3	10.5	19812010	32
53502	105.45	39.47	1.0318	4	11.6	15.5	3.6	10.5	19812010	26
53502	105.45	39.47	1.0318	5	18.9	23.9	3.5	10.5	19812010	28
53502	105.45	39.47	1.0318	6	24	29.8	3.3	10.5	19812010	33
53502	105.45	39.47	1.0318	7	26.2	31.8	3.2	10.5	19812010	42
53502	105.45	39.47	1.0318	8	23.8	28.5	3	10.5	19812010	46
53502	105.45	39.47	1.0318	9	17.8	21	2.7	10.5	19812010	46
53502	105.45	39.47	1.0318	10	9.5	11.2	2.6	10.5	19812010	42
53502	105.45	39.47	1.0318	11	0	0.2	2.9	10.5	19812010	43
53502	105.45	39.47	1.0318	12	-7.4	-7.5	2.8	10.5	19812010	47
57014	105.52	34.34	1.0852	9	17.2	19.4	1.4	10.5	19812010	78	11.2917	13.6083	68.75
57014	105.52	34.34	1.0852	10	11.3	12.7	1.2	10.5	19812010	78
57014	105.52	34.34	1.0852	11	4.7	5.6	1.1	10.5	19812010	74
57014	105.52	34.34	1.0852	12	-0.9	-0.6	1.2	10.5	19812010	69
57014	105.52	34.34	1.0852	1	-1.7	-1.3	1.4	10.5	19812010	66
57014	105.52	34.34	1.0852	2	1.8	3	1.7	10.5	19812010	62
57014	105.52	34.34	1.0852	3	6.8	8.9	1.9	10.5	19812010	61
57014	105.52	34.34	1.0852	4	12.8	16	1.7	10.5	19812010	61
57014	105.52	34.34	1.0852	5	17.3	21.6	1.6	10.5	19812010	64
57014	105.52	34.34	1.0852	6	21	25.3	1.4	10.5	19812010	68
57014	105.52	34.34	1.0852	7	23.2	27.2	1.6	10.5	19812010	71
57014	105.52	34.34	1.0852	8	22	25.5	1.6	10.5	19812010	73
53810	105.54	36.58	1.3393	1	-6.6	-5.9	2.1	10.5	19812010	51	9.50833	12.3333	51.9167
53810	105.54	36.58	1.3393	2	-2.3	-0.8	2.6	10.5	19812010	47
53810	105.54	36.58	1.3393	3	4.3	7.1	3.1	10.5	19812010	44
53810	105.54	36.58	1.3393	4	11.5	15.6	3.3	10.5	19812010	41
53810	105.54	36.58	1.3393	5	17.3	22.1	3.4	10.5	19812010	44
53810	105.54	36.58	1.3393	6	21.4	26.7	3.3	10.5	19812010	49
53810	105.54	36.58	1.3393	7	23.4	28.4	3.3	10.5	19812010	57
53810	105.54	36.58	1.3393	8	21.6	25.6	3.1	10.5	19812010	62
53810	105.54	36.58	1.3393	9	16.6	19.8	2.8	10.5	19812010	62
53810	105.54	36.58	1.3393	10	9.8	11.6	2.5	10.5	19812010	59
53810	105.54	36.58	1.3393	11	1.8	2.5	2.4	10.5	19812010	55
53810	105.54	36.58	1.3393	12	-4.7	-4.7	2.3	10.5	19812010	52
53917	106.04	35.13	1.631	1	-5	-4	0	10.5	19812010	63	8.36667	10.9583	66.75
53917	106.04	35.13	1.631	2	-1.4	-0.1	0	10.5	19812010	62
53917	106.04	35.13	1.631	3	3.6	5.9	0	10.5	19812010	61
53917	106.04	35.13	1.631	4	9.7	13.3	0	10.5	19812010	57
53917	106.04	35.13	1.631	5	14.5	19.1	0	10.5	19812010	60
53917	106.04	35.13	1.631	6	18	22.8	0	10.5	19812010	66
53917	106.04	35.13	1.631	7	20.3	24.4	0	10.5	19812010	71
53917	106.04	35.13	1.631	8	19	22.6	0	10.5	19812010	74
53917	106.04	35.13	1.631	9	14.4	16.8	0	10.5	19812010	77
53917	106.04	35.13	1.631	10	8.5	10.1	0	10.5	19812010	76
53917	106.04	35.13	1.631	11	2.2	3.3	0	10.5	19812010	70
53917	106.04	35.13	1.631	12	-3.4	-2.7	0	10.5	19812010	64
57110	106.05	33.47	0.9308	1	-0.1	1.3	0.9	10.5	19812010	70	12.0667	15.125	74.6667
57110	106.05	33.47	0.9308	2	3.1	5.1	1.1	10.5	19812010	67
57110	106.05	33.47	0.9308	3	7.6	10.1	1.3	10.5	19812010	67
57110	106.05	33.47	0.9308	4	13.2	16.8	1.4	10.5	19812010	68
57110	106.05	33.47	0.9308	5	17.5	22.4	1.2	10.5	19812010	71
57110	106.05	33.47	0.9308	6	21.1	26	1.2	10.5	19812010	73
57110	106.05	33.47	0.9308	7	23.3	28.2	1.1	10.5	19812010	78
57110	106.05	33.47	0.9308	8	22.2	26.7	1	10.5	19812010	81
57110	106.05	33.47	0.9308	9	17.6	20.6	0.9	10.5	19812010	85
57110	106.05	33.47	0.9308	10	12.2	14.4	0.8	10.5	19812010	84
57110	106.05	33.47	0.9308	11	6.2	7.8	0.9	10.5	19812010	79
57110	106.05	33.47	0.9308	12	0.9	2.1	0.9	10.5	19812010	73
53617	106.05	38.02	1.118	1	-6.1	-6.3	2.7	10.5	19812010	47	9.775	12.4333	53.0833
53617	106.05	38.02	1.118	2	-2.2	-1.5	2.7	10.5	19812010	43
53617	106.05	38.02	1.118	3	4.3	6.2	2.9	10.5	19812010	43
53617	106.05	38.02	1.118	4	12.1	15.5	2.9	10.5	19812010	39
53617	106.05	38.02	1.118	5	17.7	23	2.5	10.5	19812010	48
53617	106.05	38.02	1.118	6	21.7	28.3	2.2	10.5	19812010	56
53617	106.05	38.02	1.118	7	23.6	29.7	2.1	10.5	19812010	63
53617	106.05	38.02	1.118	8	21.6	26.5	1.9	10.5	19812010	68
53617	106.05	38.02	1.118	9	16.5	19.8	1.8	10.5	19812010	67
53617	106.05	38.02	1.118	10	9.9	11.4	1.9	10.5	19812010	59
53617	106.05	38.02	1.118	11	2.4	1.9	2.7	10.5	19812010	54
53617	106.05	38.02	1.118	12	-4.2	-5.3	2.9	10.5	19812010	50
53914	106.07	35.37	2.0786	1	-7.6	-5.9	2	10.5	19812010	60	5.625	8.225	64.8333
53914	106.07	35.37	2.0786	2	-4.3	-2.1	2.2	10.5	19812010	60
53914	106.07	35.37	2.0786	3	0.6	3	2.5	10.5	19812010	59
53914	106.07	35.37	2.0786	4	6.8	10.1	2.6	10.5	19812010	56
53914	106.07	35.37	2.0786	5	11.7	16	2.5	10.5	19812010	58
53914	106.07	35.37	2.0786	6	15.2	19.8	2.2	10.5	19812010	67
53914	106.07	35.37	2.0786	7	17.3	21	2	10.5	19812010	73
53914	106.07	35.37	2.0786	8	16.3	19.3	2.1	10.5	19812010	74
53914	106.07	35.37	2.0786	9	11.9	13.9	2.1	10.5	19812010	74
53914	106.07	35.37	2.0786	10	5.9	7.5	2.1	10.5	19812010	72
53914	106.07	35.37	2.0786	11	-0.4	0.9	2.1	10.5	19812010	65
53914	106.07	35.37	2.0786	12	-5.9	-4.8	2	10.5	19812010	60
57106	106.09	33.19	0.7942	1	2.5	3.4	1.8	11	19812010	64	13.6	15.925	72
57106	106.09	33.19	0.7942	2	5	6.4	2.1	11	19812010	64
57106	106.09	33.19	0.7942	3	9.2	11	2.2	11	19812010	64
57106	106.09	33.19	0.7942	4	14.6	17.4	2.3	11	19812010	65
57106	106.09	33.19	0.7942	5	18.7	22.5	2	11	19812010	69
57106	106.09	33.19	0.7942	6	21.9	25.9	1.8	11	19812010	74
57106	106.09	33.19	0.7942	7	23.9	28	1.6	11	19812010	79
57106	106.09	33.19	0.7942	8	23.1	27	1.6	11	19812010	79
57106	106.09	33.19	0.7942	9	18.7	20.9	1.5	11	19812010	83
57106	106.09	33.19	0.7942	10	13.7	15.2	1.5	11	19812010	81
57106	106.09	33.19	0.7942	11	8.4	9.3	1.7	11	19812010	74
57106	106.09	33.19	0.7942	12	3.5	4.1	1.7	11	19812010	68
57011	106.09	34.45	1.3782	1	-4	-2.8	1.3	10.5	19812010	68	9.16667	12.0083	71.5
57011	106.09	34.45	1.3782	2	-0.5	1.1	1.6	10.5	19812010	66
57011	106.09	34.45	1.3782	3	4.5	7.2	1.7	10.5	19812010	65
57011	106.09	34.45	1.3782	4	10.5	14.3	1.8	10.5	19812010	63
57011	106.09	34.45	1.3782	5	15.2	20	1.5	10.5	19812010	66
57011	106.09	34.45	1.3782	6	18.8	23.8	1.3	10.5	19812010	70
57011	106.09	34.45	1.3782	7	21.1	25.6	1.3	10.5	19812010	74
57011	106.09	34.45	1.3782	8	19.8	23.5	1.3	10.5	19812010	78
57011	106.09	34.45	1.3782	9	15.1	17.7	1.1	10.5	19812010	81
57011	106.09	34.45	1.3782	10	9.3	11.2	1.1	10.5	19812010	80
57011	106.09	34.45	1.3782	11	2.9	4.3	1.1	10.5	19812010	76
57011	106.09	34.45	1.3782	12	-2.7	-1.8	1.1	10.5	19812010	71
53612	106.11	37.59	1.1288	1	-6.1	-5.9	2.5	10.5	19812010	49	9.96667	13.0833	53.25
53612	106.11	37.59	1.1288	2	-2.1	-1.1	2.5	10.5	19812010	45
53612	106.11	37.59	1.1288	3	4.5	6.8	2.7	10.5	19812010	44
53612	106.11	37.59	1.1288	4	12.2	16.1	2.6	10.5	19812010	40
53612	106.11	37.59	1.1288	5	17.9	23.9	2.3	10.5	19812010	47
53612	106.11	37.59	1.1288	6	22	29.2	2	10.5	19812010	54
53612	106.11	37.59	1.1288	7	24	30.6	2	10.5	19812010	61
53612	106.11	37.59	1.1288	8	22	27.2	1.9	10.5	19812010	66
53612	106.11	37.59	1.1288	9	16.9	20.5	1.8	10.5	19812010	65
53612	106.11	37.59	1.1288	10	10.1	11.9	2	10.5	19812010	59
53612	106.11	37.59	1.1288	11	2.4	2.4	2.4	10.5	19812010	57
53612	106.11	37.59	1.1288	12	-4.2	-4.6	2.8	10.5	19812010	52
57012	106.12	34.59	1.6645	1	-5.2	-4.3	1.1	10.5	19892010	69	8.10833	10.5917	71.5
57012	106.12	34.59	1.6645	2	-1.5	-0.1	1.4	10.5	19892010	69
57012	106.12	34.59	1.6645	3	3.5	6	1.7	10.5	19892010	66
57012	106.12	34.59	1.6645	4	9.2	13	1.7	10.5	19892010	63
57012	106.12	34.59	1.6645	5	13.8	18.4	1.7	10.5	19892010	65
57012	106.12	34.59	1.6645	6	17.6	22.2	1.5	10.5	19892010	70
57012	106.12	34.59	1.6645	7	19.9	23.6	1.6	10.5	19892010	74
57012	106.12	34.59	1.6645	8	18.7	21.4	1.6	10.5	19892010	77
57012	106.12	34.59	1.6645	9	14.3	16.1	1.4	10.5	19892010	80
57012	106.12	34.59	1.6645	10	8.3	9.7	1.1	10.5	19892010	80
57012	106.12	34.59	1.6645	11	2	3.3	1.2	10.5	19892010	75
57012	106.12	34.59	1.6645	12	-3.3	-2.2	1.1	10.5	19892010	70
53910	106.12	35.4	2.8412	1	-9.9	-8.3	5.9	7	19812010	60	1.45833	4.01667	68.6667
53910	106.12	35.4	2.8412	2	-8.3	-5.5	5.7	7	19812010	66
53910	106.12	35.4	2.8412	3	-4.3	-1	6.1	7	19812010	67
53910	106.12	35.4	2.8412	4	1.6	4.2	6.2	7	19812010	63
53910	106.12	35.4	2.8412	5	6.6	10	6.2	7	19812010	65
53910	106.12	35.4	2.8412	6	10.4	14.3	5.6	7	19812010	71
53910	106.12	35.4	2.8412	7	12.4	16.2	5.4	7	19812010	79
53910	106.12	35.4	2.8412	8	11.4	14.5	5.5	7	19812010	82
53910	106.12	35.4	2.8412	9	7.3	9.5	5.4	7	19812010	80
53910	106.12	35.4	2.8412	10	1.8	3.7	5.5	7	19812010	73
53910	106.12	35.4	2.8412	11	-3.5	-2.2	6.1	7	19812010	62
53910	106.12	35.4	2.8412	12	-8	-7.2	6.5	7	19812010	56
53614	106.12	38.28	1.1109	1	-7.3	-6.8	1.9	11.8	19812010	55	9.525	12.1667	55.25
53614	106.12	38.28	1.1109	2	-2.8	-1.9	2.2	11.8	19812010	49
53614	106.12	38.28	1.1109	3	4	6	2.6	11.8	19812010	45
53614	106.12	38.28	1.1109	4	11.8	15.3	2.9	11.8	19812010	40
53614	106.12	38.28	1.1109	5	17.8	22.5	2.7	11.8	19812010	46
53614	106.12	38.28	1.1109	6	22.1	27.9	2.4	11.8	19812010	53
53614	106.12	38.28	1.1109	7	23.9	29.7	2.2	11.8	19812010	61
53614	106.12	38.28	1.1109	8	21.9	26.3	2	11.8	19812010	66
53614	106.12	38.28	1.1109	9	16.7	19.7	2	11.8	19812010	66
53614	106.12	38.28	1.1109	10	9.7	11.2	2	11.8	19812010	60
53614	106.12	38.28	1.1109	11	1.7	1.6	2	11.8	19812010	62
53614	106.12	38.28	1.1109	12	-5.2	-5.5	1.9	11.8	19812010	60
53618	106.15	38.17	1.1137	1	-6.9	-6.4	2.3	10.5	19812010	53	9.6	12.7333	55.6667
53618	106.15	38.17	1.1137	2	-2.6	-1.4	2.6	10.5	19812010	47
53618	106.15	38.17	1.1137	3	4.1	6.5	2.9	10.5	19812010	44
53618	106.15	38.17	1.1137	4	11.9	15.8	3	10.5	19812010	40
53618	106.15	38.17	1.1137	5	17.6	23.2	2.7	10.5	19812010	49
53618	106.15	38.17	1.1137	6	21.7	28.6	2.4	10.5	19812010	58
53618	106.15	38.17	1.1137	7	23.7	30.2	2.2	10.5	19812010	64
53618	106.15	38.17	1.1137	8	21.8	27	2.1	10.5	19812010	68
53618	106.15	38.17	1.1137	9	16.6	20.1	2	10.5	19812010	67
53618	106.15	38.17	1.1137	10	9.9	11.6	2.1	10.5	19812010	60
53618	106.15	38.17	1.1137	11	2.1	2.4	2.4	10.5	19812010	60
53618	106.15	38.17	1.1137	12	-4.7	-4.8	2.4	10.5	19812010	58
53817	106.16	36	1.753	1	-7.4	-6.7	2.3	10.5	19812010	57	6.91667	9.15833	61.3333
53817	106.16	36	1.753	2	-3.9	-2.3	2.6	10.5	19812010	57
53817	106.16	36	1.753	3	1.7	3.8	3	10.5	19812010	56
53817	106.16	36	1.753	4	8.6	11.7	3.1	10.5	19812010	51
53817	106.16	36	1.753	5	14	17.8	3.1	10.5	19812010	53
53817	106.16	36	1.753	6	17.7	21.7	2.7	10.5	19812010	60
53817	106.16	36	1.753	7	19.4	23.4	2.5	10.5	19812010	68
53817	106.16	36	1.753	8	18	21.1	2.6	10.5	19812010	73
53817	106.16	36	1.753	9	13.2	15.3	2.4	10.5	19812010	74
53817	106.16	36	1.753	10	7	8.2	2.4	10.5	19812010	70
53817	106.16	36	1.753	11	0.2	1.1	2.4	10.5	19812010	61
53817	106.16	36	1.753	12	-5.5	-5.2	2.5	10.5	19812010	56
57111	106.18	33.55	0.9614	1	0	1.1	0	10.5	19812010	65	12.0083	14.9333	71.5
57111	106.18	33.55	0.9614	2	3.1	4.7	0	10.5	19812010	63
57111	106.18	33.55	0.9614	3	7.5	10.1	0	10.5	19812010	63
57111	106.18	33.55	0.9614	4	13.2	16.8	0	10.5	19812010	64
57111	106.18	33.55	0.9614	5	17.5	22.3	0	10.5	19812010	68
57111	106.18	33.55	0.9614	6	21	25.9	0	10.5	19812010	71
57111	106.18	33.55	0.9614	7	23.2	28.1	0	10.5	19812010	76
57111	106.18	33.55	0.9614	8	22.1	26.5	0	10.5	19812010	78
57111	106.18	33.55	0.9614	9	17.5	20.4	0	10.5	19812010	83
57111	106.18	33.55	0.9614	10	12	14.1	0	10.5	19812010	82
57111	106.18	33.55	0.9614	11	6.1	7.4	0	10.5	19812010	76
57111	106.18	33.55	0.9614	12	0.9	1.8	0	10.5	19812010	69
53619	106.18	38.07	1.1159	1	-7.2	-6.9	2.7	10.3	19812010	52	9.21667	12.075	56.5833
53619	106.18	38.07	1.1159	2	-2.9	-2.4	2.9	10.3	19812010	47
53619	106.18	38.07	1.1159	3	3.9	5.3	3.2	10.3	19812010	45
53619	106.18	38.07	1.1159	4	11.6	14.8	3.2	10.3	19812010	41
53619	106.18	38.07	1.1159	5	17.4	22.6	2.9	10.3	19812010	50
53619	106.18	38.07	1.1159	6	21.4	27.9	2.6	10.3	19812010	58
53619	106.18	38.07	1.1159	7	23.4	29.7	2.5	10.3	19812010	66
53619	106.18	38.07	1.1159	8	21.4	26.6	2.4	10.3	19812010	70
53619	106.18	38.07	1.1159	9	16.1	20	2.3	10.3	19812010	70
53619	106.18	38.07	1.1159	10	9	11.1	2.4	10.3	19812010	64
53619	106.18	38.07	1.1159	11	1.5	1.6	2.8	10.3	19812010	60
53619	106.18	38.07	1.1159	12	-5	-5.4	3	10.3	19812010	56
53916	106.19	35.3	1.9486	1	-6.4	-4.9	3	10.5	19812010	58	6.23333	8.89167	65.4167
53916	106.19	35.3	1.9486	2	-4	-1.8	3	10.5	19812010	61
53916	106.19	35.3	1.9486	3	0.9	3.3	3.1	10.5	19812010	61
53916	106.19	35.3	1.9486	4	7.4	10.6	3.4	10.5	19812010	57
53916	106.19	35.3	1.9486	5	12.3	16.5	3.3	10.5	19812010	60
53916	106.19	35.3	1.9486	6	15.8	20.7	3	10.5	19812010	67
53916	106.19	35.3	1.9486	7	17.7	21.8	2.8	10.5	19812010	75
53916	106.19	35.3	1.9486	8	16.5	19.8	2.9	10.5	19812010	78
53916	106.19	35.3	1.9486	9	12.1	14.3	2.9	10.5	19812010	78
53916	106.19	35.3	1.9486	10	6.4	8	2.9	10.5	19812010	73
53916	106.19	35.3	1.9486	11	0.6	1.9	3.2	10.5	19812010	61
53916	106.19	35.3	1.9486	12	-4.5	-3.5	3.1	10.5	19812010	56
53517	106.2	39.16	1.4645	9	15.9	18.6	2.7	10	19812010	52	8.49167	11.0833	42.8333
53517	106.2	39.16	1.4645	10	8.4	10	2.6	10	19812010	47
53517	106.2	39.16	1.4645	11	0.4	0.3	2.7	10	19812010	43
53517	106.2	39.16	1.4645	12	-5.9	-6.7	2.8	10	19812010	45
53517	106.2	39.16	1.4645	1	-7.7	-8.1	2.6	10	19812010	46
53517	106.2	39.16	1.4645	2	-4.2	-3.3	2.8	10	19812010	41
53517	106.2	39.16	1.4645	3	2	4.6	3.2	10	19812010	36
53517	106.2	39.16	1.4645	4	10	14.2	3.5	10	19812010	31
53517	106.2	39.16	1.4645	5	16.7	22.1	3.6	10	19812010	34
53517	106.2	39.16	1.4645	6	21.5	27.2	3.5	10	19812010	39
53517	106.2	39.16	1.4645	7	23.4	28.5	3.3	10	19812010	48
53517	106.2	39.16	1.4645	8	21.4	25.6	3.1	10	19812010	52
53610	106.21	38.34	1.1062	1	-7.4	-7.5	1.5	10.3	19812010	55	9.45	12.3667	54.8333
53610	106.21	38.34	1.1062	2	-3	-2.3	1.9	10.3	19812010	48
53610	106.21	38.34	1.1062	3	3.8	6	2.3	10.3	19812010	45
53610	106.21	38.34	1.1062	4	11.8	15.7	2.6	10.3	19812010	39
53610	106.21	38.34	1.1062	5	17.8	23.4	2.4	10.3	19812010	45
53610	106.21	38.34	1.1062	6	22.1	29.1	2.2	10.3	19812010	53
53610	106.21	38.34	1.1062	7	24.1	30.5	2	10.3	19812010	60
53610	106.21	38.34	1.1062	8	22	27.1	1.8	10.3	19812010	66
53610	106.21	38.34	1.1062	9	16.7	20.3	1.7	10.3	19812010	65
53610	106.21	38.34	1.1062	10	9.6	11.3	1.6	10.3	19812010	60
53610	106.21	38.34	1.1062	11	1.4	1.2	1.7	10.3	19812010	62
53610	106.21	38.34	1.1062	12	-5.5	-6.4	1.5	10.3	19812010	60
53518	106.21	39.02	1.1177	1	-7	-7.2	1.4	10	19812010	51	10.1	12.9917	47.8333
53518	106.21	39.02	1.1177	2	-2.5	-1.4	1.8	10	19812010	44
53518	106.21	39.02	1.1177	3	4.5	7.2	2.3	10	19812010	39
53518	106.21	39.02	1.1177	4	12.4	16.8	2.6	10	19812010	32
53518	106.21	39.02	1.1177	5	18.8	24.6	2.5	10	19812010	37
53518	106.21	39.02	1.1177	6	23.3	29.8	2.2	10	19812010	43
53518	106.21	39.02	1.1177	7	25.1	30.9	2	10	19812010	52
53518	106.21	39.02	1.1177	8	22.9	27.6	1.8	10	19812010	58
53518	106.21	39.02	1.1177	9	17.4	20.6	1.6	10	19812010	58
53518	106.21	39.02	1.1177	10	10	11.7	1.7	10	19812010	53
53518	106.21	39.02	1.1177	11	1.6	1.5	1.7	10	19812010	53
53518	106.21	39.02	1.1177	12	-5.3	-6.2	1.5	10	19812010	54
53231	106.24	41.24	1.5096	1	-13.4	-12.7	5.2	10.5	19812010	58	5.55	8.36667	41
53231	106.24	41.24	1.5096	2	-8.9	-7.5	5.3	10.5	19812010	47
53231	106.24	41.24	1.5096	3	-1.6	0.9	5.5	10.5	19812010	35
53231	106.24	41.24	1.5096	4	7.3	11.1	5.9	10.5	19812010	26
53231	106.24	41.24	1.5096	5	15	19.9	6	10.5	19812010	27
53231	106.24	41.24	1.5096	6	20.5	25.9	5.6	10.5	19812010	31
53231	106.24	41.24	1.5096	7	22.9	27.9	5.2	10.5	19812010	39
53231	106.24	41.24	1.5096	8	20.5	24.3	4.9	10.5	19812010	44
53231	106.24	41.24	1.5096	9	14.4	17.5	5	10.5	19812010	40
53231	106.24	41.24	1.5096	10	5.7	7.5	5.1	10.5	19812010	39
53231	106.24	41.24	1.5096	11	-4.3	-3.6	5.5	10.5	19812010	49
53231	106.24	41.24	1.5096	12	-11.5	-10.8	5.5	10.5	19812010	57
53881	106.29	37.17	1.3822	1	-6.2	-6	2.5	10.5	19812010	44	9.35833	11.8417	47.4167
53881	106.29	37.17	1.3822	2	-2.5	-1.3	2.8	10.5	19812010	43
53881	106.29	37.17	1.3822	3	3.8	6.4	3.2	10.5	19812010	40
53881	106.29	37.17	1.3822	4	11.1	14.9	3.4	10.5	19812010	37
53881	106.29	37.17	1.3822	5	17	21.7	3.4	10.5	19812010	40
53881	106.29	37.17	1.3822	6	21.4	26.6	3.3	10.5	19812010	45
53881	106.29	37.17	1.3822	7	23.2	28.3	3.2	10.5	19812010	54
53881	106.29	37.17	1.3822	8	21.1	24.8	2.9	10.5	19812010	61
53881	106.29	37.17	1.3822	9	16.1	18.7	2.7	10.5	19812010	61
53881	106.29	37.17	1.3822	10	9.5	10.7	2.8	10.5	19812010	55
53881	106.29	37.17	1.3822	11	2	2.1	2.8	10.5	19812010	46
53881	106.29	37.17	1.3822	12	-4.2	-4.8	2.8	10.5	19812010	43
57113	106.32	33.54	0.9859	1	0	0.8	0.9	10.7	19932010	58	12.0583	14.3333	68.25
57113	106.32	33.54	0.9859	2	3.5	4.8	0.9	10.7	19932010	58
57113	106.32	33.54	0.9859	3	7.9	10	1	10.7	19932010	58
57113	106.32	33.54	0.9859	4	13.4	16.2	1	10.7	19932010	61
57113	106.32	33.54	0.9859	5	17.4	21.2	0.9	10.7	19932010	66
57113	106.32	33.54	0.9859	6	20.7	24.9	0.8	10.7	19932010	72
57113	106.32	33.54	0.9859	7	23.2	27.1	0.8	10.7	19932010	76
57113	106.32	33.54	0.9859	8	21.9	25.1	0.8	10.7	19932010	78
57113	106.32	33.54	0.9859	9	17.4	19.6	0.7	10.7	19932010	80
57113	106.32	33.54	0.9859	10	12	13.5	0.7	10.7	19932010	79
57113	106.32	33.54	0.9859	11	6.2	7.1	0.8	10.7	19932010	71
57113	106.32	33.54	0.9859	12	1.1	1.7	0.9	10.7	19932010	62
57113	106.32	33.54	0.9859	1	-0.4	-0.1	0	10.7	119811992	58	11.0583	13.1833	68.8333
57113	106.32	33.54	0.9859	2	1.9	3.2	0	10.7	119811992	55
57113	106.32	33.54	0.9859	3	6.3	8.2	0	10.7	119811992	59
57113	106.32	33.54	0.9859	4	12.3	15	0	10.7	119811992	62
57113	106.32	33.54	0.9859	5	16.5	20.2	0	10.7	119811992	69
57113	106.32	33.54	0.9859	6	19.8	23.7	0	10.7	119811992	74
57113	106.32	33.54	0.9859	7	21.8	25.8	0	10.7	119811992	79
57113	106.32	33.54	0.9859	8	21.1	24.6	0	10.7	119811992	81
57113	106.32	33.54	0.9859	9	16.4	18.7	0	10.7	119811992	82
57113	106.32	33.54	0.9859	10	11.3	12.5	0	10.7	119811992	77
57113	106.32	33.54	0.9859	11	5.4	5.8	0	10.7	119811992	67
57113	106.32	33.54	0.9859	12	0.3	0.6	0	10.7	119811992	63
53611	106.33	38.53	1.0987	1	-7.6	-6.9	1.6	10.5	19812010	54	9.41667	12.3167	53.6667
53611	106.33	38.53	1.0987	2	-3.2	-2	2	10.5	19812010	48
53611	106.33	38.53	1.0987	3	3.6	5.7	2.4	10.5	19812010	45
53611	106.33	38.53	1.0987	4	11.6	15.3	2.7	10.5	19812010	39
53611	106.33	38.53	1.0987	5	17.9	23.2	2.5	10.5	19812010	44
53611	106.33	38.53	1.0987	6	22.1	28.3	2.3	10.5	19812010	52
53611	106.33	38.53	1.0987	7	24.2	29.8	2.2	10.5	19812010	59
53611	106.33	38.53	1.0987	8	22.2	26.9	2	10.5	19812010	64
53611	106.33	38.53	1.0987	9	16.9	20.1	1.8	10.5	19812010	63
53611	106.33	38.53	1.0987	10	9.6	11.4	1.8	10.5	19812010	57
53611	106.33	38.53	1.0987	11	1.3	1.6	1.9	10.5	19812010	61
53611	106.33	38.53	1.0987	12	-5.6	-5.6	1.7	10.5	19812010	58
53927	106.37	35.12	1.4776	9	14	16.7	1.4	10.5	19812010	83	7.83333	10.6833	71.5833
53927	106.37	35.12	1.4776	10	8.1	10.1	1.3	10.5	19812010	80
53927	106.37	35.12	1.4776	11	1.4	3.1	1.4	10.5	19812010	74
53927	106.37	35.12	1.4776	12	-4.3	-2.8	1.3	10.5	19812010	68
53927	106.37	35.12	1.4776	1	-6	-4.2	1.4	10.5	19812010	65
53927	106.37	35.12	1.4776	2	-2.6	-0.6	1.5	10.5	19812010	66
53927	106.37	35.12	1.4776	3	2.8	5	1.6	10.5	19812010	67
53927	106.37	35.12	1.4776	4	9.3	12.8	1.9	10.5	19812010	63
53927	106.37	35.12	1.4776	5	14.3	18.8	1.8	10.5	19812010	65
53927	106.37	35.12	1.4776	6	18.1	22.8	1.5	10.5	19812010	70
53927	106.37	35.12	1.4776	7	20.2	24.3	1.5	10.5	19812010	77
53927	106.37	35.12	1.4776	8	18.7	22.2	1.5	10.5	19812010	81
52607	106.39	39.26	1.2526	1	-9.3	-7.9	2.4	10.7	19812010	49	8.64167	11.9833	44.4167
52607	106.39	39.26	1.2526	2	-4.4	-2.5	3.1	10.7	19812010	42
52607	106.39	39.26	1.2526	3	2.8	5.7	3.8	10.7	19812010	36
52607	106.39	39.26	1.2526	4	10.9	15.1	4.2	10.7	19812010	31
52607	106.39	39.26	1.2526	5	17.5	22.6	4.3	10.7	19812010	35
52607	106.39	39.26	1.2526	6	22.2	28.1	4.2	10.7	19812010	39
52607	106.39	39.26	1.2526	7	24.3	29.9	4	10.7	19812010	48
52607	106.39	39.26	1.2526	8	22.2	26.8	3.9	10.7	19812010	53
52607	106.39	39.26	1.2526	9	16.6	20.1	3.5	10.7	19812010	54
52607	106.39	39.26	1.2526	10	8.8	11.3	3.1	10.7	19812010	50
52607	106.39	39.26	1.2526	11	-0.4	1.1	2.7	10.7	19812010	47
52607	106.39	39.26	1.2526	12	-7.5	-6.5	2.7	10.7	19812010	49
53915	106.4	35.33	1.3466	5	15.8	20	2.2	10.5	19812010	58	9.275	11.5583	63.5
53915	106.4	35.33	1.3466	6	19.6	23.9	1.9	10.5	19812010	63
53915	106.4	35.33	1.3466	7	21.5	25.3	1.9	10.5	19812010	71
53915	106.4	35.33	1.3466	8	20	23.3	1.8	10.5	19812010	76
53915	106.4	35.33	1.3466	9	15.2	17.5	1.7	10.5	19812010	78
53915	106.4	35.33	1.3466	10	9	10.5	1.7	10.5	19812010	74
53915	106.4	35.33	1.3466	11	2.7	3.3	1.9	10.5	19812010	64
53915	106.4	35.33	1.3466	12	-2.7	-2.6	1.9	10.5	19812010	57
53915	106.4	35.33	1.3466	1	-4.2	-3.6	1.9	10.5	19812010	55
53915	106.4	35.33	1.3466	2	-0.9	0.3	2.1	10.5	19812010	56
53915	106.4	35.33	1.3466	3	4.4	6.6	2.3	10.5	19812010	56
53915	106.4	35.33	1.3466	4	10.9	14.2	2.4	10.5	19812010	54
57119	106.42	33.1	0.5481	9	19.9	22.6	1.1	10.5	19812010	83	14.425	17.0667	77.4167
57119	106.42	33.1	0.5481	10	14.8	16.5	1	10.5	19812010	83
57119	106.42	33.1	0.5481	11	8.9	9.9	1	10.5	19812010	82
57119	106.42	33.1	0.5481	12	3.8	4.5	1	10.5	19812010	79
57119	106.42	33.1	0.5481	1	2.8	3.6	1	10.5	19812010	76
57119	106.42	33.1	0.5481	2	5.4	6.8	1.3	10.5	19812010	73
57119	106.42	33.1	0.5481	3	9.6	11.7	1.4	10.5	19812010	73
57119	106.42	33.1	0.5481	4	15.2	18.6	1.4	10.5	19812010	73
57119	106.42	33.1	0.5481	5	19.9	24	1.4	10.5	19812010	72
57119	106.42	33.1	0.5481	6	23.3	27.8	1.4	10.5	19812010	74
57119	106.42	33.1	0.5481	7	25.1	29.9	1.2	10.5	19812010	80
57119	106.42	33.1	0.5481	8	24.4	28.9	1.2	10.5	19812010	81
53615	106.42	38.48	1.1016	1	-8.5	-8.3	2	10.5	19812010	52	9.01667	11.3167	51.75
53615	106.42	38.48	1.1016	2	-3.9	-3.5	2.3	10.5	19812010	47
53615	106.42	38.48	1.1016	3	3.2	4.5	2.7	10.5	19812010	44
53615	106.42	38.48	1.1016	4	11.3	14.1	2.9	10.5	19812010	38
53615	106.42	38.48	1.1016	5	17.8	22.2	2.8	10.5	19812010	42
53615	106.42	38.48	1.1016	6	22.2	27.5	2.5	10.5	19812010	48
53615	106.42	38.48	1.1016	7	24.3	29.6	2.5	10.5	19812010	57
53615	106.42	38.48	1.1016	8	22.3	26.4	2.3	10.5	19812010	62
53615	106.42	38.48	1.1016	9	16.8	19.6	2.1	10.5	19812010	61
53615	106.42	38.48	1.1016	10	9.2	10.4	2.1	10.5	19812010	56
53615	106.42	38.48	1.1016	11	0.2	0.1	2.1	10.5	19812010	58
53615	106.42	38.48	1.1016	12	-6.7	-6.8	2	10.5	19812010	56
53519	106.46	39.13	1.0925	1	-7.8	-7.1	2.5	10.5	19812010	50	9.29167	12.1583	48.75
53519	106.46	39.13	1.0925	2	-3.5	-2.4	2.8	10.5	19812010	45
53519	106.46	39.13	1.0925	3	3.4	5.6	3.4	10.5	19812010	39
53519	106.46	39.13	1.0925	4	11.4	15.2	3.7	10.5	19812010	34
53519	106.46	39.13	1.0925	5	17.8	23	3.6	10.5	19812010	40
53519	106.46	39.13	1.0925	6	22.1	28.2	3.2	10.5	19812010	47
53519	106.46	39.13	1.0925	7	24.3	29.8	3	10.5	19812010	55
53519	106.46	39.13	1.0925	8	22.3	26.9	2.8	10.5	19812010	59
53519	106.46	39.13	1.0925	9	16.9	20.1	2.6	10.5	19812010	58
53519	106.46	39.13	1.0925	10	9.6	11.3	2.6	10.5	19812010	52
53519	106.46	39.13	1.0925	11	0.9	1.2	2.7	10.5	19812010	54
53519	106.46	39.13	1.0925	12	-5.9	-5.9	2.6	10.5	19812010	52
53512	106.48	39.48	1.1056	1	-8.1	-9.1	1.7	10.5	19812010	50	10.1	12.175	41.4167
53512	106.48	39.48	1.1056	2	-3.4	-3.1	2.2	10.5	19812010	42
53512	106.48	39.48	1.1056	3	3.8	5.7	3	10.5	19812010	34
53512	106.48	39.48	1.1056	4	12.2	15.7	3.5	10.5	19812010	28
53512	106.48	39.48	1.1056	9	18.3	20.7	2.8	10.5	19812010	48
53512	106.48	39.48	1.1056	10	10.3	11.2	2.4	10.5	19812010	45
53512	106.48	39.48	1.1056	11	1	0.3	2.1	10.5	19812010	46
53512	106.48	39.48	1.1056	12	-6.1	-7.9	1.8	10.5	19812010	49
53512	106.48	39.48	1.1056	5	19.1	23.9	3.6	10.5	19812010	30
53512	106.48	39.48	1.1056	6	24.1	29.6	3.5	10.5	19812010	35
53512	106.48	39.48	1.1056	7	26.1	31.2	3.3	10.5	19812010	43
53512	106.48	39.48	1.1056	8	23.9	27.9	3.1	10.5	19812010	47
57003	106.5	34.54	0.9242	1	-2.2	-1	1.2	10.9	19812010	62	11.0667	13.8	70.3333
57003	106.5	34.54	0.9242	2	1	2.8	1.4	10.9	19812010	63
57003	106.5	34.54	0.9242	3	6	8.6	1.7	10.9	19812010	65
57003	106.5	34.54	0.9242	4	12.1	15.9	1.7	10.9	19812010	66
57003	106.5	34.54	0.9242	5	17	21.8	1.5	10.9	19812010	69
57003	106.5	34.54	0.9242	6	21.3	26	1.4	10.9	19812010	68
57003	106.5	34.54	0.9242	7	23.4	27.6	1.3	10.9	19812010	74
57003	106.5	34.54	0.9242	8	21.7	25.3	1.1	10.9	19812010	80
57003	106.5	34.54	0.9242	9	17.1	19.7	1	10.9	19812010	82
57003	106.5	34.54	0.9242	10	11.5	13.1	1.1	10.9	19812010	78
57003	106.5	34.54	0.9242	11	4.8	5.9	1.2	10.9	19812010	72
57003	106.5	34.54	0.9242	12	-0.9	-0.1	1.2	10.9	19812010	65
57213	106.56	33	0.5365	1	2.5	3.7	0.7	11	19812010	81	14.35	17.225	81.25
57213	106.56	33	0.5365	2	5.1	6.7	0.9	11	19812010	78
57213	106.56	33	0.5365	3	9.3	11.7	1	11	19812010	77
57213	106.56	33	0.5365	4	15	18.6	1.1	11	19812010	77
57213	106.56	33	0.5365	5	19.8	24.1	1.1	11	19812010	76
57213	106.56	33	0.5365	6	23.5	27.9	1	11	19812010	78
57213	106.56	33	0.5365	7	25.3	30.3	1	11	19812010	83
57213	106.56	33	0.5365	8	24.5	29.4	1	11	19812010	83
57213	106.56	33	0.5365	9	20	22.9	0.9	11	19812010	86
57213	106.56	33	0.5365	10	14.8	16.7	0.8	11	19812010	86
57213	106.56	33	0.5365	11	8.8	10.1	0.7	11	19812010	86
57213	106.56	33	0.5365	12	3.6	4.6	0.6	11	19812010	84
57124	106.56	33.38	1.0321	1	0.4	1.7	1.5	11	19812010	64	11.5583	14.55	73.75
57124	106.56	33.38	1.0321	2	2.9	4.7	1.6	11	19812010	65
57124	106.56	33.38	1.0321	3	7	9.2	1.6	11	19812010	66
57124	106.56	33.38	1.0321	4	12.5	15.8	1.8	11	19812010	67
57124	106.56	33.38	1.0321	5	16.5	21.2	1.5	11	19812010	73
57124	106.56	33.38	1.0321	6	19.8	24.9	1.3	11	19812010	77
57124	106.56	33.38	1.0321	7	22.2	27.2	1.2	11	19812010	81
57124	106.56	33.38	1.0321	8	21.3	25.9	1.2	11	19812010	82
57124	106.56	33.38	1.0321	9	16.8	20	1.1	11	19812010	86
57124	106.56	33.38	1.0321	10	11.6	13.9	1.2	11	19812010	83
57124	106.56	33.38	1.0321	11	6.2	7.6	1.5	11	19812010	74
57124	106.56	33.38	1.0321	12	1.5	2.5	1.5	11	19812010	67
53419	107	40.2	1.0553	1	-9.2	-8.8	2.8	10.5	19812010	53	8.78333	11.2833	46.9167
53419	107	40.2	1.0553	2	-4.9	-4.5	2.7	10.5	19812010	46
53419	107	40.2	1.0553	3	2.1	3.3	2.9	10.5	19812010	40
53419	107	40.2	1.0553	4	10.8	13.3	3.1	10.5	19812010	33
53419	107	40.2	1.0553	5	18	22.2	2.9	10.5	19812010	35
53419	107	40.2	1.0553	6	22.8	28	2.6	10.5	19812010	42
53419	107	40.2	1.0553	7	24.7	30.6	2.3	10.5	19812010	51
53419	107	40.2	1.0553	8	22.4	27.4	2.2	10.5	19812010	56
53419	107	40.2	1.0553	9	16.9	20.1	2.1	10.5	19812010	54
53419	107	40.2	1.0553	10	9	10.5	2.3	10.5	19812010	50
53419	107	40.2	1.0553	11	-0.1	0.1	2.9	10.5	19812010	51
53419	107	40.2	1.0553	12	-7.1	-6.8	3.1	10.5	19812010	52
53928	107.01	35.18	1.1491	1	-3.4	-3	0	10.5	19812010	57	10.2833	12.8833	64.5
53928	107.01	35.18	1.1491	2	0	1.1	0	10.5	19812010	58
53928	107.01	35.18	1.1491	3	5.3	7.6	0	10.5	19812010	58
53928	107.01	35.18	1.1491	4	11.8	15.5	0	10.5	19812010	56
53928	107.01	35.18	1.1491	5	16.8	21.7	0	10.5	19812010	59
53928	107.01	35.18	1.1491	6	20.7	26	0	10.5	19812010	63
53928	107.01	35.18	1.1491	7	22.7	27.2	0	10.5	19812010	70
53928	107.01	35.18	1.1491	8	21.1	25	0	10.5	19812010	76
53928	107.01	35.18	1.1491	9	16.4	19.1	0	10.5	19812010	78
53928	107.01	35.18	1.1491	10	10.3	11.8	0	10.5	19812010	74
53928	107.01	35.18	1.1491	11	3.7	4.4	0	10.5	19812010	66
53928	107.01	35.18	1.1491	12	-2	-1.8	0	10.5	19812010	59
57127	107.02	33.04	0.5095	1	2.8	3.6	0.8	11	19812010	80	14.6667	16.8167	79.1667
57127	107.02	33.04	0.5095	2	5.5	6.7	1.1	11	19812010	75
57127	107.02	33.04	0.5095	3	9.8	11.5	1.3	11	19812010	74
57127	107.02	33.04	0.5095	4	15.5	18	1.2	11	19812010	74
57127	107.02	33.04	0.5095	5	20.1	23.2	1.3	11	19812010	74
57127	107.02	33.04	0.5095	6	23.6	27	1.2	11	19812010	76
57127	107.02	33.04	0.5095	7	25.6	29.4	1.2	11	19812010	80
[truncated: 389 more rows]
[truncated: 2 more columns]

## Sheet: Hren&Sh >20 N LAT
Locality	Lat.	Long.	Surface elevation (m)	Lake Surface Area (km2)	Mean depth (m)	Max. Depth (m)	Water surface T - Jan	Water surface T - Feb	Water surface T -Mar	Water surface T -April	Water surface T -May	Water surface T -Jun	Water surface T -July	Water surface T -Aug	Water surface T -Sept	Water surface T -Oct	Water surface T -Nov	Water surface T -Dec	MAWT (˚C)	(MAWT (˚C))^2	AMJJASO WT (˚C)	(AMJJASO WT (˚C))^2	JJA MAWT (˚C)	(JJA MAWT (˚C))^2	Air T - Jan	Air T - Feb	Air T - Mar	Air T - April	Air T - May	Air T - Jun	Air T - July	Air T - Aug	Air T - Sept	Air T - Oct	Air T - Nov	Air T - Dec	MAAT (˚C)	AMJJASO AT (˚C)	JJA AT (˚C)	Water T˚C Ref.	Air T˚C Ref.
Florida (central 3 lakes shallow <5.5 m)	27.199	-81.246	45	1	2	5	14.3	21.3	22.4	24.8	26.2	29.1	30.5	30.1	28.3	25.5	21.8	17.4	24.3	590.49	27.7857	772.046	29.9	894.01	16.9	17.6	19.8	22	24.8	26.9	27.6	27.7	27	24.2	21	17.9	22.8	25.7429	27.4	10	f
Florida (central 3 lakes deep >5.5 m)	27.199	-81.246	45	1	5	10	16.9	18.4	20.5	24.2	25.6	29.6	30.8	28.4	27.7	26	21.8	19.2	24.1	580.81	27.4714	754.679	29.6	876.16	16.9	17.6	19.8	22	24.8	26.9	27.6	27.7	27	24.2	21	17.9	22.8	25.7429	27.4	10	f
Reedy Lake, Orange county, Florida	28.416	-81.613	34	1	2	5	16.7	18.6	22.6	25.1	28.8	29.2	30.1	29.5	29.7	27.3	23.2	18.7	25	625	28.5286	813.879	29.6	876.16	15.7	16.8	19.4	21.7	24.7	27	27.8	27.8	26.9	23.5	20	16.7	22.3	25.6286	27.5333	11	f
Florida (central south 3 lakes deep >5.5 m)	28.53	-81.597	40	1	5	10	15.8	17.3	20.2	24.1	25.9	28.3	30.1	29.8	27.9	26.1	21.9	17.3	23.7	561.69	27.4571	753.895	29.4	864.36	15.6	16.7	19.4	21.6	24.7	27	27.8	27.8	26.9	23.5	20	16.7	22.3	25.6143	27.5333	10	f					USING "DATA ANALYSIS"
Florida (central south 3 lakes shallow <5.5 m)	28.53	-81.597	40	2	5	5	13.9	16.7	19.2	24.6	20	28	30.5	29.4	27.4	24.5	20.1	18.3	22.7	515.29	26.3429	693.946	29.3	858.49	15.6	16.7	19.4	21.6	24.7	27	27.8	27.8	26.9	23.5	20	16.7	22.3	25.6143	27.5333	10	f
Wadi El-Rayan Lake, Egypt	29.176	30.447	-40	-	-	-	14.8	16.6	18.7	20.2	24.4	25.8	26.4	28.2	26.2	23	20.5	17.4	21.9	479.61	24.8857	619.299	26.8	718.24	12.5	13.7	16.1	22	25.9	26.3	27.9	28.2	26.3	25	19.8	13	21.4	25.9429	27.4667	12	12					SUMMARY OUTPUT
Caillou Lake, Terrebonne Parish, Louisiana	29.249	-90.921	0	40	1	3	13.6	15.2	19.1	22.8	27	29.6	30.3	30.6	28.2	23.9	19.1	14.2	22.8	519.84	27.4857	755.464	30.1667	910.028	12.1	13.4	16.7	20.1	24.1	27.3	28.2	28.1	26.6	22.2	16.9	13.3	20.7	25.2286	27.8667	11	f
Lake George, Volusia County, Florida	29.308	-81.606	122	90	2	5	15.7	15.7	18.8	22.2	24.9	27.7	29	29.1	27.7	24.4	19.7	16.5	22.6	510.76	26.4286	698.469	28.6	817.96	13.6	14.8	17.7	20.5	24	26.8	27.9	27.6	26.4	22.4	18.4	14.7	21.2	25.0857	27.4333	11	f					Regression Statistics
Caminada Bay, Jefferson Parish, Louisiana	29.325	-89.941	0	100	2	2	14.4	14.9	18.9	22.8	26.4	29.2	30.2	30.2	28.9	25.3	20.6	15.8	23.1	533.61	27.5714	760.184	29.8667	892.018	12.1	13.5	16.8	20.1	24.1	27	28	27.9	26.3	21.8	17.1	13.4	20.7	25.0286	27.6333	11	f					Multiple R	0.971524
Lake Judge Perez, Plaquemines Parish, Louisiana	29.423	-89.951	0	2	1	3	13.8	15	18.9	22.7	26.7	29.4	30.2	30.3	28.2	23.8	19.3	14.6	22.7	515.29	27.3286	746.851	29.9667	898.001	12.4	13.9	17	20.4	24.3	27.3	28.2	28.2	26.7	22.4	17.6	13.9	21	25.3571	27.9	11	f					R Square	0.943858
Lake Qarun, Egypt	29.433	30.486	-43	78	5	12	15	18.1	21	22.7	25	28.1	29.6	27.5	27.2	24.8	21.2	16	23	529	26.4143	697.714	28.4	806.56	12.8	14.2	17	21.4	24.9	27.7	28.5	28.3	26.5	23.5	18.4	14.2	21.5	25.8286	28.1667	3	I					Adjusted R Square	0.943056
Little Lake, Jefferson Parish, Louisiana	29.467	-90.1	0	50	1	3	13.1	14.3	19	22.7	26.7	29.5	29.9	30	28.1	23.8	18.9	13.8	22.5	506.25	27.2429	742.173	29.8	888.04	12.1	13.5	16.8	20.1	24.1	27	28	27.9	26.3	21.8	17.1	13.4	20.7	25.0286	27.6333	11	f					Standard Error	1.95867
Unnamed lake Lafourche Parish, Louisiana	29.518	-90.181	0	1	1	1	13.2	14.9	18.6	22.5	26.5	29.3	30.1	30.2	28.1	23.7	18.6	13.8	22.5	506.25	27.2	739.84	29.8667	892.018	11.9	13.3	16.7	19.9	24	26.9	27.9	27.8	26.1	21.5	16.8	13.1	20.5	24.8714	27.5333	11	f					Observations	72
Florida (north central 3 lakes - shallow <5.5 m)	29.672	-82.278	54	1	3	5	11.9	10	17	21.2	20.5	27.8	29.8	29.3	27.4	23.5	19.7	14.5	21.1	445.21	25.6429	657.556	28.9667	839.068	12.7	14.1	17.2	19.8	23.6	26.4	27.4	27.1	25.8	21.4	17.3	13.7	20.5	24.5	26.9667	10	f
Florida (north central 3 lakes - deep >5.5 m)	29.672	-82.278	54	1	10	10	13.2	10.8	15.8	20.1	19.5	26.9	28.9	27.8	26.8	23.7	19.8	16	20.8	432.64	24.8143	615.749	27.8667	776.551	12.7	14.1	17.2	19.8	23.6	26.4	27.4	27.1	25.8	21.4	17.3	13.7	20.5	24.5	26.9667	10	f					ANOVA
Hog Lake, Vermilion Parish, Louisiana	29.674	-92.136	0	0	1	1	12.7	15	18.5	22.7	26.6	29.5	30.4	30.5	28.1	23.5	18.3	12.9	22.4	501.76	27.3286	746.851	30.1333	908.018	10.3	12	15.9	19.4	23.7	26.7	27.6	27.5	25.6	20.5	15.6	11.8	19.7	24.4286	27.2667	11	f						df	SS	MS
Near Vermillion Bay, St. Mary Parish, Louisiana	29.713	-91.88	0	1	1	1	12.4	14.4	17.8	22.2	26	29.1	30.1	29.9	27.9	23.3	18.2	13.1	22	484	26.9286	725.148	29.7	882.09	10.7	12.2	16	19.5	23.8	26.8	27.7	27.5	25.7	20.7	15.8	12	19.9	24.5286	27.3333	11	f					Regression	1	4514.81	4514.81
Lake Charlotte, Chambers County, Texas	29.867	-94.715	5	1	2	2	12.5	14	17.2	21.6	26.2	29.3	30.7	30.7	27.9	22.7	18	13.7	22	484	27.0143	729.772	30.2333	914.054	11	12.7	16.6	20	24	27.2	28.4	28.3	26	21.3	16.2	12.2	20.3	25.0286	27.9667	11	f					Residual	70	268.548	3.83639
Calcaseiu Lake, Cameron Parish, Louisiana	30.032	-93.299	0	256	1	3	13	14.4	18	22.3	26.3	29.3	30.3	30.6	28.3	23.9	19	13.9	22.4	501.76	27.2857	744.51	30.0667	904.004	10.8	12.7	16.5	19.9	24.1	27.1	28.2	28	25.9	21	15.9	12	20.2	24.8857	27.7667	11	f					Total	71	4783.36
Lake Charles, Calcasieu Parish, Louisiana	30.237	-93.247	0	2	2	5	12	13.5	17.4	21.7	25.6	28.6	29.8	30.6	29.1	24	18.8	13.4	22	484	27.0571	732.089	29.6667	880.111	10	11.9	15.8	19.3	23.5	26.6	27.8	27.6	25.3	20.2	15.2	11.3	19.6	24.3286	27.3333	11	f
Dead Sea, Israel	31.33	35.5	-423	810	118	377	21.8	22.3	22.7	25.5	27.4	30.6	33.5	33.5	32.4	29.5	26	23.4	27.4	750.76	30.3429	920.689	32.5333	1058.42	18.3	18.9	20.8	24.2	27.7	30.8	32.7	32.9	31.5	28.9	24	19.9	25.9	29.8143	32.1333	18	g						Coefficients	Standard Error	t Stat
Lake Waco, Mclennan County, Texas	31.575	-97.194	143	31	-	26	10.5	11.4	14.8	19.9	23.9	27.7	29	29.8	27.4	23.9	17.5	12.7	20.7	428.49	25.9429	673.032	28.8333	831.361	7.7	10.4	14.7	18.7	23	26.9	29	28.9	25.5	20	13.8	9.1	19	24.5714	28.2667	11	f					Intercept	-11.5774	0.758101	-15.2715
Sea of Galilee, Israel	32.833	35.55	-209	170	25.6	43	15.7	14.7	16	19.4	23.2	26.7	27.9	28.6	28.4	26.3	22.3	18	22.3	497.29	25.7857	664.903	27.7333	769.138	12	13	15	18	22	24	28	29	28	20	18	14	20.1	24.1429	27	13	e					X Variable 1	1.20287	0.0350641	34.3051
Unnamed lake, Tarrant County, Texas	32.853	-97.044	154	1	-	-	11.3	9.4	15.5	19	22.3	23	24.4	24.6	23.1	19.7	15.1	10.7	18.2	331.24	22.3	497.29	24	576	6.8	9.7	14.1	18.3	22.7	27.1	29.5	29.2	25.3	19.6	13.1	8.3	18.6	24.5286	28.6	11	f
Bee Lake, Holmes County, Mississippi	33.066	-90.328	34	2	3	5	10.2	10.8	16	20.8	24.7	29.3	30	30.2	26.8	21.8	15.1	10.7	20.5	420.25	26.2286	687.938	29.8333	890.028	6.2	8.8	13.2	17.5	22.2	26.1	27.7	27.2	24.1	18.2	12.4	7.9	17.6	23.2857	27	11	f
Aguelmame Sidi Ali Lake, Morocco	33.083	-5	2100	40	36	50	7	7	7	9.5	12	16	20	18.5	19	15	7	7	12.1	146.41	15.7143	246.939	18.1667	330.028	2.6	3.8	5.6	7.3	11.3	15.8	20.9	20.8	16.8	11.4	6.4	3.1	10.5	14.9	19.1667	3	I
Lake Moultrie, South Carolina	33.215	-79.975	16	240	6	23	8.9	8.6	11.4	16.6	22.7	27.1	28.8	26	25.1	22.3	17.6	11.9	18.9	357.21	24.0857	580.122	27.3	745.29	7.9	9.5	13.6	17.4	21.8	25.4	27.5	26.6	23.9	18.1	13.7	9.4	17.9	22.9571	26.5	11	f
Lake Peachtree, Georgia	33.36	-84.586	232	2	-	8	6.7	8.9	12.4	17.4	21.6	26.4	26.3	26.2	23.4	17	11.6	8.7	17.2	295.84	22.6143	511.406	26.3	691.69	6.3	8.3	12.5	16.3	20.5	24.5	26.4	25.7	22.7	16.8	11.9	7.7	16.6	21.8429	25.5333	11	f
Salton Sea, CA	33.497	-116.006	-69	974	16	16	14.3	15.7	21.2	25.3	28.6	32.2	33.6	35.3	34	29.3	22.9	17.3	25.8	665.64	31.1857	972.549	33.7	1135.69	12.7	15.3	18.4	22	25.9	30.1	32.9	32.6	29.6	23.6	16.3	12.3	22.6	28.1	31.8667	14	f
Strom Thurmond Reservoir, South Carolina	33.84	-82.351	100	288	14	56	6.3	8.2	12.9	17.2	22	27.1	26.4	27.6	24.6	17.9	12.6	9.4	17.7	313.29	23.2571	540.895	27.0333	730.801	6	8	12.3	16.3	20.8	24.9	26.9	26.1	23	16.7	11.7	7.3	16.7	22.1	25.9667	11	f					SUMMARY OUTPUT
Lake Murray, South Carolina	34.052	-81.221	110	200	-	61	11	9.8	11.8	17.1	22.5	27	29.2	28.9	26.3	22.4	18	14.1	19.8	392.04	24.7714	613.624	28.3667	804.668	6.6	8.5	12.7	16.8	21.3	25.2	27.2	26.3	23.3	17.2	12.2	7.9	17.1	22.4714	26.2333	11	f
Richard Russell Lake, South Carolina	34.101	-82.618	145	108	14	56	5.9	7.7	12.5	17.1	22	27.3	26.3	27.7	23.8	17.5	12.2	8.9	17.4	302.76	23.1	533.61	27.1	734.41	5.7	7.6	11.8	15.9	20.4	24.5	26.6	25.8	22.6	16.3	11.4	7	16.3	21.7286	25.6333	11	f					Regression Statistics
Lake Hartwell, South Carolina	34.475	-82.816	100	230	15	56	6.6	7.6	12.6	17.2	22.1	27.6	27.2	27.9	23.9	18.1	12.6	9.2	17.7	313.29	23.4286	548.898	27.5667	759.921	5.6	7.6	11.8	16	20.4	24.5	26.5	25.7	22.5	16.4	11.3	7	16.3	21.7143	25.5667	11	f					Multiple R	0.945888
Lake Maumelle, Arkansas	34.875	-92.654	107	22	8	18	5.3	7	11.6	17.1	22.8	29	30.2	29.4	25.9	19.7	14.2	7.5	18.3	334.89	24.8714	618.588	29.5333	872.218	4.3	7.3	11.8	16.3	20.8	25.1	27.4	26.7	23	16.9	10.6	5.8	16.3	22.3143	26.4	11	f					R Square	0.894704
Pickwick Lake, Mississippi	34.914	-88.247	122	174	-	18	5.1	7.5	12.5	16.2	20.9	26.7	28.9	28.2	25.8	20.1	14.2	10.3	18	324	23.8286	567.801	27.9333	780.271	3.9	6.4	11.1	15.6	20	24.3	26.4	25.7	22.3	16.1	10.5	5.8	15.7	21.4857	25.4667	11	f					Adjusted R Square	0.8932
Lake Norman, NC	35.52	-80.92	213	129	8	30	8.5	9.5	12.7	18.1	23.1	28	30.1	30.3	27.7	21.7	16	10.6	19.7	388.09	25.5714	653.898	29.4667	868.284	3.6	5.6	10.3	14.4	19.2	23.3	25.3	24.4	20.8	14.7	9.4	5.3	14.7	20.3	24.3333	11	f					Standard Error	2.6824
Lake Mead, Temple Basin	36.046	-114.313	366	640	-	149	12.9	12.4	13.9	15.8	22.7	24.2	28.5	28.7	27	22.7	19	16.2	20.3	412.09	24.2286	587.024	27.1333	736.218	1.4	5.6	9.2	14.2	19.7	24.4	28.9	27.5	23.6	17.5	9.2	1.7	15.2	22.2571	26.9333	11	f					Observations	72
Lake Mead Sentinel Island	36.057	-114.746	367	640	-	149	13.8	13.3	14.2	15.6	20.9	23.7	28.5	28.6	26.5	22.9	19.6	15.6	20.3	412.09	23.8143	567.12	26.9333	725.404	9	11.9	15.3	19.8	25.1	30.4	33.7	32.8	28.5	21.3	13.7	9.2	20.9	27.3714	32.3	11	f
Ichkeul Lake, Tunisia	37.176	9.834	50	126	<5	5	11.5	11.5	14.5	17.2	19.9	23.2	26	26.3	24.9	21.6	15.6	12.5	18.7	349.69	22.7286	516.588	25.1667	633.361	10.9	10.9	12.4	14.7	18.4	22.6	25.7	26.1	23.8	20	15.3	12	17.7	21.6143	24.8	3	e					ANOVA
Lake Powell	37.481	-110.702	1127	658	40	170	7.8	7.8	12.2	12.2	17.8	21.7	25.6	26.1	23.3	19.4	16.1	10.6	16.7	278.89	20.8714	435.617	24.4667	598.618	2.1	5.8	10.3	14.7	20.2	26	29.4	28.1	23.3	16	8.4	3.1	15.6	22.5286	27.8333	11	f						df	SS	MS
Cheney Reservoir, Sedgwick County, Kansas	37.726	-97.794	427	26	-	13	1.5	2.6	7.7	13.2	18.8	23.8	26.3	26.6	22.8	16.6	10.5	3.7	14.5	210.25	21.1571	447.625	25.5667	653.654	-0.6	2.6	8	13.4	18.7	24.4	27.3	26.5	21.7	15.1	7	1.2	13.8	21.0143	26.0667	11	f					Regression	1	4279.69	4279.69
Sussex County, Delaware	38.595	-75.291	1	2	5	5	7	3.4	10.7	13.9	21	25.5	28.2	27.8	24.8	15.9	12	8.3	16.5	272.25	22.4429	503.682	27.1667	738.028	2.2	3.3	7.3	12.3	17.5	22.4	24.9	24.1	20.6	14.7	9.5	4.5	13.6	19.5	23.8	11	f					Residual	70	503.669	7.19526
Unnamed Lake Fairfax County, Virginia	38.885	-77.333	126	0	-	-	2.7	4.3	8.8	13.3	16.4	21.6	22.1	21	19.1	14.6	8.6	5	13.1	171.61	18.3	334.89	21.5667	465.121	0.4	2.2	6.8	12.3	17.5	22.1	24.7	23.7	19.9	13.5	8	2.9	12.8	19.1	23.5	11	f					Total	71	4783.36
Carson Lake, Nevada	39.343	-118.743	1193	10	-	10	3.8	7	9.6	13.2	17	20.1	23.1	21.9	18.5	11.8	6.1	2.9	12.9	166.41	17.9429	321.946	21.7	470.89	0.5	3.9	7.2	10.6	15.2	19.8	24	22.9	18.1	11.8	5	0.5	11.6	17.4857	22.2333	11	f
Great Salt Lake South Arm, Utah	40.715	-112.322	1280	1700	5	10	1.1	2.8	6.7	13.3	18.1	22.2	25.6	25	20.6	16.7	7.8	1.7	13.4	179.56	20.2143	408.617	24.2667	588.871	-1.4	1.4	6.2	10.1	15.1	20.8	25.2	24.4	18.5	11.5	4.3	-0.7	11.3	17.9429	23.4667	11	h						Coefficients	Standard Error	t Stat
Picatinny Lake, New Jersey	40.96	-74.54	217	2	-	6	1.1	2.1	4.1	9.9	15.1	18.7	21.8	20.9	17.4	13.1	7.1	2.5	11.2	125.44	16.7	278.89	20.4667	418.884	-3.8	-2.5	2.4	8.2	14	18.6	21.3	20.5	16.2	10	4.8	-0.9	9.1	15.5429	20.1333	11	f					Intercept	-16.5821	1.26119	-13.1479
Lake Ontario, Marblehead, OH	41.547	-82.736	75	19500	86	244	1.2	1	0.7	9.6	15.3	22.4	24	25	20.1	12.9	7.3	3.9	12	144	18.4714	341.194	23.8	566.44	-3.8	-2.5	2.5	8.6	15.1	20.6	23.3	22.3	18.4	12	5.6	-0.7	10.1	17.1857	22.0667	11	f					X Variable 1	1.24205	0.0509282	24.3884
Walworth County, Wisconsin	42.56	-89.488	265	1	-	-	1.3	2.6	4.8	8.5	12.7	15.5	16.8	16	14	10.6	6.5	2.7	9.3	86.49	13.4429	180.71	16.1	259.21	-8.2	-5.2	1.1	8	14.6	19.8	22.1	20.7	16.2	9.7	2.1	-5.1	8	15.8714	20.8667	11	f
Lake Ontario, Buffalo, NY	42.881	-78.895	75	19500	86	244	1.3	-2	0.6	7.8	13.2	18.2	22.4	21.2	15.9	10	6.7	3.1	9.9	98.01	15.5286	241.137	20.6	424.36	-4.4	-3.9	0.5	6.3	12.7	18.1	21.2	20.5	16.6	10.4	4.7	-1	8.5	15.1143	19.9333	11	f
Crater Lake, Oregon	42.976	-122.088	1883	21	350	594	4.3	3.9	4	4.4	5.5	9.4	14.2	16.5	14.2	11.4	7.6	5.1	8.4	70.56	10.8	116.64	13.3667	178.668	-2.6	-2	-0.7	1.2	4.5	8.5	12.9	13.2	10.1	5.7	-0.3	-2.4	4	8.01429	11.5333	11	f
Lake Trasimeno, Italy	43.12	12.101	258	128	4	6	5.5	6	10.2	14.1	19	24.3	27	26	21	17	11.5	7	15.7	246.49	21.2	449.44	25.7667	663.921	4.5	5.5	11	12.5	17	20	24	22.5	19.7	14	10	6	13.9	18.5286	22.1667	15	I
Lake Okoboji, Iowa	43.379	-95.181	426	-	-	-	1.1	-0.4	0.1	2.9	7.8	17.4	20.5	21.1	22.3	19.9	14.6	9.8	11.4	129.96	15.9857	255.543	19.6667	386.778	-10.1	-6.4	0.1	7.8	15	20.2	22.5	21.1	16.3	9.4	0	-7.4	7.4	16.0429	21.2667	11	f
Lake Winnepesauke, NH	43.589	-71.389	154	71	-	65	1.2	2.2	3.5	7.4	13.6	20	24.4	23.4	19	12.7	9.2	3.3	11.7	136.89	17.2143	296.332	22.6	510.76	-7.2	-5.5	-0.1	6.4	13	17.9	20.8	19.7	14.7	8.5	2.8	-3.8	7.3	14.4286	19.4667	11	f
Cedar Lake, Manitowoc County, Wisconsin	43.926	-87.94	365	2	-	17	0.5	0.2	3.6	7	13.7	21.2	24.7	23.3	17.8	11.2	7.3	0.9	11	121	16.9857	288.514	23.0667	532.071	-7.9	-5.2	0.4	6.9	13.3	18.5	21.3	20.3	15.9	9.5	2.2	-4.8	7.5	15.1	20.0333	11	f
Polk County, Wisconsin	45.41	-92.508	341	0	-	-	0	0.1	1.2	7.2	15.1	16.5	18.4	17.4	13.1	8.6	3.2	0.4	8.4	70.56	13.7571	189.259	17.4333	303.921	-12.1	-8.3	-1.5	6.5	13.8	18.5	21	19.8	14.5	8	-0.8	-8.9	5.9	14.5857	19.7667	11	f
Mud Lake, Brown County, South Dakota	45.669	-98.309	390	4	-	1	0.8	0.8	2.1	10.2	17.3	21.8	23.2	21.8	16.1	8.6	2.9	2	10.6	112.36	17	289	22.2667	495.804	-12.6	-8.3	-1.6	6.9	13.9	19	22	20.9	15.1	7.8	-2.1	-9.5	6	15.0857	20.6333	11	f
Dakota Lake, Dickey County, North Dakota	45.948	-98.175	390	2	<10	5	1.3	1.5	0.6	6.9	14.2	21.1	24.1	23.4	16.4	8.9	2.5	1.7	10.2	104.04	16.4286	269.898	22.8667	522.884	-12.9	-8.7	-1.9	6.7	14	19	21.8	20.8	14.9	7.7	-2.3	-9.7	5.8	14.9857	20.5333	11	f
Lake near De Tour Villahe, MI	46.001	-83.903	176	59596	59	228	-2.3	-2.5	-0.5	4	9.1	15.5	18.3	17.6	15.7	8.4	3.4	-1	7.1	50.41	12.6571	160.203	17.1333	293.551	-8.8	-8	-3.1	3.7	10.7	15.7	19.1	18.8	14.2	8	2	-4.5	5.6	12.8857	17.8667	11	f
Lake Zurich, Switzerland	47.359	8.542	406	87	49	143	5	4	4.5	8.9	14.5	18.7	21.8	21.9	19.2	14.5	11.5	7	12.6	158.76	17.0714	291.434	20.8	432.64	-0.1	0.3	4.5	8.6	12.7	15.9	17.6	17	14	8.6	3.7	0.1	8.5	13.4857	16.8333	13	I
Lake Washington, WA	47.613	-122.262	5	86	33	65	7.8	7	7	9	12	16	19	21.5	19	15.5	12.5	9	12.9	166.41	16	256	18.8333	354.694	4.8	6	7.4	9	12.5	15.2	17.5	17.5	15.2	11	7	4.8	10.7	13.9857	16.7333	16	f
Lake Pend Oreille, Pend Oreille County, Washington	48.989	-117.349	646	148	-	351	1.1	1.9	4	7.5	11.5	15.2	21	22.4	18.9	12.9	6.7	2.3	10.5	110.25	15.6286	244.252	19.5333	381.551	-3.6	-0.7	3.3	7.9	12.2	15.8	19.1	19	14.1	7.6	1.3	-2.9	7.8	13.6714	17.9667	11	f
Okanagan Lake at Kelowna, BC	49.886	-119.497	342	6200	76	232	5	5	5.8	7.7	11	15.4	19.2	21	17.5	14.9	10.3	6.3	11.6	134.56	15.2429	232.345	18.5333	343.484	-3.7	-1.7	3	8.3	13	16.7	19.7	18.5	13.6	7.9	2.5	-1.1	8.1	13.9571	18.3	17	j
Cheslatta Lake at West End, BC	53.709	-125.625	600	890	-	305	1.3	1.9	2.6	4.5	7.7	11.2	13	15.5	13.6	10.3	5.4	2.5	7.4	54.76	10.8286	117.258	13.2333	175.121	-9.5	-6.6	-2.5	2.2	6.8	10.4	13	12.9	9.1	4.1	-3.4	-8.1	2.4	8.35714	12.1	17	j
Wollaston Lake at Ross Channel, Saskatchewan	58.481	-103.281	398	2286	21	71	-0.5	-0.5	-0.5	0.5	2.5	9.4	15.4	14.8	9.5	5.7	0.6	-0.3	4.7	22.09	8.25714	68.1804	13.2	174.24	-19.2	-17.4	-6.2	1.4	3.8	12.6	16.4	12.6	7.2	2.4	-4.6	-24.3	-1.3	8.05714	13.8667	17	j
Lake Athabasca, Saskatchewan	59.382	-108.881	213	204	20	124	2.2	2.2	2.4	3.4	5.2	8.5	14.3	15.7	12.6	9.1	4.2	2.4	6.9	47.61	9.82857	96.6008	12.8333	164.694	-18.4	-11.6	-4.6	4	6.9	14.1	17.8	15.3	9.7	4.5	-2.3	-18.3	1.4	10.3286	15.7333	17	j
Tazin Lake near Outlet, Saskatchewan	59.819	-109.408	213	150	>50	100	1.3	1.2	1.3	2.2	3.2	8.1	14.4	16.4	12.1	7.3	3.5	1.5	6	36	9.1	82.81	12.9667	168.134	-19.9	-14.6	-5.2	2.5	6.1	13.6	16.6	14.2	8.4	3	-6.1	-19.9	-0.1	9.2	14.8	17	j
Marsh Lake near Whitehorse, Yukon	60.531	-134.365	600	120	>50	100	1.9	1.9	2	3.1	9	13.8	13.3	14.9	13.5	8.2	3.3	2.1	7.3	53.29	10.8286	117.258	14	196	-20.4	-12.5	-7.7	0.8	7.2	13	14.1	12	7.7	0.8	-8.7	-14.3	-0.7	7.94286	13.0333	17	j
Ennadi Lake near Ennadai, Nunavut	61.114	-101.029	311	669	>50	100	1.2	1.2	1.1	1.3	1.9	3.8	11.4	13.5	10	4.5	1.3	1.3	4.4	19.36	6.62857	43.938	9.56667	91.5211	-25	-26.3	-21.4	-12.5	-2.3	8.1	14.1	11.7	5.4	-4.4	-16.1	-23.8	-7.7	2.87143	11.3	17	j
Sekulmun Lake near Whitehorse, Yukon Territory	61.536	-137.59	914	25	>50	100	0.9	0.8	1	1.9	3.4	10.2	13.2	13.1	10	5.6	0.7	0.7	5.1	26.01	8.2	67.24	12.1667	148.028	-17.4	-12.6	-6.1	1.9	7.8	12.9	14.8	13.2	7.6	0.8	-9.4	-14.5	-0.1	8.42857	13.6333	17	j
Aishihik Lake near Aishihik, Yukon Territory	61.593	-137.411	914	146	30	120	0.9	1	1	2	4.4	9.2	13.2	13.9	9.4	4.5	1.7	0.9	5.2	27.04	8.08571	65.3788	12.1	146.41	-21.5	-17.3	-12.4	-4.4	4.2	9.8	11.9	9.9	5	-3.1	-13.5	-20.6	-4.3	4.75714	10.5333	17	j
Duncan Lake near Yellowknife, Yukon Territory	62.808	-114.033	213	50	>50	200	-0.6	-0.7	-0.8	0	3.3	8.1	13.7	18.8	13.6	7.3	0.2	-0.5	5.2	27.04	9.25714	85.6947	13.5333	183.151	-27.3	-25.4	-18.4	-6.6	4	12	15.4	12.9	6.1	-2.2	-14.6	-25.1	-5.8	5.94286	13.4333	17	j
Mayo Lake, BC	63.773	-135.388	660	50	>50	200	1	1	1	2.1	5.1	9.8	12.6	14.8	11.5	4.9	1.8	1	5.5	30.25	8.68571	75.4416	12.4	153.76	-25.5	-19.6	-10.7	-0.1	8	13.7	15.3	12.5	6.4	-2.2	-15.3	-22.4	-3.3	7.65714	13.8333	17	j
[truncated: 5 more columns]

## Sheet: Summary
Summary Monte Carlo Simulation - Lake - AMJJASO to MAAT
Age (Ma)	Sample	Δ47T (˚C)	Δ47T 1 s.e.	AIR T	1 ST DEV	ELEVATION	1 ST DEV
2.05848	YL-187-11160/11161	9.14036	4.61692	-0.620989	5.5525	3.56776	1.20563
2.19194	YL-192-11679/11680	14.1225	2.03182	5.43803	2.58313	2.24442	0.562961
2.38546	YL-199-12361/12362	14.9363	3.66785	6.38709	4.49091	2.02161	0.982357
2.43447	YL-200-12539/12540	13.3014	2.18224	4.40098	2.73277	2.46597	0.602494
2.67587	YL-207-13255/13256	14.6179	2.22819	5.98283	2.83643	2.13113	0.621486
2.76621	YL-209-13423/13424	13.954	2.18501	5.26132	2.84547	2.26535	0.613916
2.85977	YL-211-13597/13598	11.0256	2.19939	1.6649	2.77383	3.05832	0.605191
3.10495	YL-224-14743/14744	22.8259	3.51019	15.816	4.33622	-0.0214683	0.947194
3.28124	YL-236-16002/16003	12.5526	2.034	3.52807	2.58544	2.65311	0.566389
3.42522	YL-245-16906/16907	7.90733	2.36098	-2.04694	2.93397	3.86556	0.640278
3.44644	YL-246-17032/17033	9.20535	2.524	-0.513524	3.09161	3.53766	0.675704
3.50217	YL-250-17363/17364	20.4143	1.9101	12.999	2.56424	0.597049	0.562632
3.55364	YL-252-17653/17654	27.7545	3.45875	21.7887	4.29319	-1.31849	0.935868
3.59244	YL-255-17899/17900	31.0277	1.31722	25.713	2.05639	-2.16535	0.470592
3.62763	YL-258-18186/18187	31.4651	2.97069	26.2986	3.84348	-2.29678	0.853829
3.69761	YL-264-18804/18805	15.3925	2.55458	6.92864	3.23617	1.92082	0.708103
3.73069	YL-267-19101/19102	19.0205	2.20056	11.3172	2.86	0.96382	0.628466
3.75944	YL-270-19358/19359	28.5839	9.21403	22.7756	11.1848	-1.54268	2.45959
3.79658	YL-273-19688/19689	16.0156	1.41407	7.68651	1.93721	1.7464	0.426305
3.80142	YL-273-19731/19732	13.3915	5.67853	4.52139	6.85888	2.44654	1.49023
3.95782	YL-287-21093/21094	17.1456	2.36254	9.06369	3.04321	1.44832	0.669969
4.18514	YL-307-23049/23050	12.8329	5.04598	3.88273	6.13719	2.55928	1.32315
4.24516	YL-314-23665/23666	21.1743	2.42077	13.9005	3.14911	0.402751	0.691157
4.31892	YL-322-24360/24361	18.0563	3.14022	10.1657	3.91938	1.21187	0.85861
4.57525	YL-349-26814/26815	39.2552	5.84456	35.7491	7.09186	-4.37492	1.55104
4.58709	YL_351_26968	5.58477	1.12531	-4.84983	1.54451	4.46988	0.338477
4.59286	YL_352_27043	24.2021	1.90405	17.5037	2.56502	-0.390899	0.574542

## Sheet: YL-187
	Coefficients (from excel Data analysis)	Standard Error (from excel Data analysis)									Coefficients (from excel Data analysis)	Standard Error (from excel Data analysis)
Intercept	-11.5774	0.758101								Intercept	3.42111	0.0442354
X coeff	1.20287	0.0350641								X coeff	-0.217546	0.00542497
YL-187-11160/11161	9.14036	4.61692								MEAN MAAT AIR T (˚C)	-0.620989	5.5525
MAAT CALCULATION										ELEVATION CALCULATION
CALCULATED RANDOMLY 10000 TIMES										CALCULATED RANDOMLY 10000 TIMES
YL-187-11160/11161	X coeff	Intercept		MAAT AIR T (˚C)	MEAN MAAT AIR T (˚C)	STD DEV	MIN	MAX		MEAN MAAT AIR T (˚C)	X coeff	Intercept		ELEVATION (Km)	MEAN ELEVATION	STD DEV	MIN	MAX
-1.01662	1.16972	-11.2364		-12.4256	-0.620989	5.5525	-23.1538	20.2605		-0.987027	-0.217538	3.37494		3.58965	3.56776	1.20563	-1.2203	7.91839
12.399	1.19272	-12.658		2.13052						7.30917	-0.221566	3.44506		1.8256
12.1649	1.20307	-11.3878		3.2474						-2.86816	-0.209071	3.42818		4.02783
2.58543	1.16492	-12.6537		-9.64188						12.3956	-0.208437	3.3629		0.779196
6.23094	1.22199	-10.3104		-2.69628						-7.51986	-0.217859	3.36825		5.00652
8.25956	1.21172	-12.2205		-2.2122						-11.4951	-0.218627	3.35313		5.86628
-0.318373	1.15885	-11.9555		-12.3245						9.86902	-0.225999	3.39382		1.16343
10.8763	1.22352	-11.667		1.64039						-3.63797	-0.221435	3.45376		4.25934
9.84228	1.22211	-12		0.0283153						-1.12055	-0.217792	3.43472		3.67876
10.1228	1.24059	-12.1539		0.404396						-5.1469	-0.210277	3.31591		4.39818
19.1179	1.21349	-11.4592		11.7401						-0.664633	-0.224951	3.35502		3.50453
10.6421	1.23003	-10.7887		2.30135						-19.6515	-0.215058	3.41746		7.64366
7.04126	1.20176	-10.6346		-2.17272						4.58416	-0.213731	3.43519		2.45542
1.44207	1.206	-11.5982		-9.85907						-7.14718	-0.220827	3.41296		4.99125
10.8427	1.185	-10.2471		2.6014						5.90319	-0.206764	3.39272		2.17215
9.01218	1.16613	-11.6208		-1.11137						-8.08928	-0.214758	3.46259		5.19983
12.8195	1.27683	-11.4642		4.90418						-10.4738	-0.223581	3.44074		5.78249
9.0665	1.21894	-12.4571		-1.40564						-2.25732	-0.219862	3.39695		3.89325
11.3187	1.27523	-12.0356		2.39838						1.38581	-0.223525	3.36857		3.05881
4.43177	1.17137	-11.6696		-6.47841						6.60802	-0.215459	3.44554		2.02178
10.5769	1.18582	-10.536		2.00635						-12.0895	-0.223433	3.42389		6.12508
9.49481	1.25959	-11.0939		0.865602						4.33746	-0.217661	3.32332		2.37922
9.61541	1.22276	-11.751		0.0063671						-5.59785	-0.220669	3.43311		4.66838
3.16955	1.2135	-12.5672		-8.72092						-3.4455	-0.22903	3.31543		4.10455
7.40028	1.21631	-10.9863		-1.98525						-1.67895	-0.208471	3.43599		3.78601
6.53359	1.22772	-11.3101		-3.28871						-4.61859	-0.216225	3.45566		4.45432
10.3389	1.21926	-11.576		1.02983						-4.92345	-0.216842	3.33771		4.40532
5.83643	1.17387	-11.4079		-4.55664						-1.34691	-0.212476	3.44466		3.73084
5.36833	1.20788	-10.7921		-4.30784						-6.74222	-0.220162	3.3503		4.83468
8.32812	1.1965	-12.7024		-2.73781						-1.66142	-0.218414	3.38509		3.74797
5.61467	1.25158	-11.8013		-4.77413						3.76195	-0.214449	3.34478		2.53803
16.9243	1.17298	-11.9664		7.88543						-5.12996	-0.222912	3.41448		4.55801
12.2052	1.21535	-10.3262		4.50739						-1.82039	-0.226681	3.37695		3.7896
15.911	1.21362	-11.2999		8.00998						-4.70154	-0.212032	3.49164		4.48851
7.06124	1.1584	-10.6597		-2.47992						-7.98649	-0.21991	3.48727		5.24358
4.64698	1.14515	-10.3568		-5.03533						4.91178	-0.216226	3.40526		2.34321
9.93999	1.15937	-12.0821		-0.558012						0.779509	-0.217011	3.31819		3.14903
12.6219	1.1856	-12.5126		2.45189						-1.29691	-0.209415	3.37377		3.64536
10.8018	1.1959	-11.1419		1.77602						-4.31457	-0.22201	3.39075		4.34862
6.33396	1.18128	-11.6093		-4.12714						-11.7824	-0.227708	3.47587		6.15883
6.35508	1.17311	-12.4873		-5.03203						3.2764	-0.226911	3.40544		2.66199
6.83911	1.20426	-10.891		-2.65495						5.20923	-0.213191	3.41479		2.30423
2.49909	1.23253	-12.5124		-9.43221						-6.81586	-0.227885	3.35911		4.91234
10.4223	1.2783	-11.2877		2.03521						-0.701661	-0.223045	3.35242		3.50892
14.1261	1.23764	-11.6158		5.86719						-3.84907	-0.229359	3.46648		4.3493
16.3958	1.18661	-11.8153		7.64014						1.65367	-0.215254	3.307		2.95104
-4.27774	1.18103	-11.5078		-16.5599						7.60072	-0.222192	3.39968		1.71085
1.47566	1.1968	-11.4887		-9.72264						-7.01671	-0.215281	3.41167		4.92224
7.70196	1.22677	-10.3402		-0.891692						-4.82104	-0.208865	3.50127		4.50822
10.8339	1.246	-11.8356		1.66356						-9.96141	-0.219043	3.49386		5.67584
7.10828	1.23599	-11.1346		-2.34889						2.06941	-0.209814	3.4789		3.04471
11.4436	1.23504	-11.4916		2.64178						-1.82361	-0.207963	3.4447		3.82395
9.34758	1.2774	-10.9114		1.02919						-4.27281	-0.219101	3.38526		4.32144
15.4098	1.21017	-10.6488		7.99968						4.52095	-0.216126	3.41953		2.44243
7.48124	1.27328	-11.2232		-1.69744						-3.5558	-0.22246	3.47917		4.2702
6.36844	1.17618	-11.0182		-3.52784						10.904	-0.21899	3.39325		1.00538
6.50446	1.1863	-12.5321		-4.81589						7.10246	-0.213821	3.49359		1.97494
9.07122	1.16654	-11.2428		-0.660856						3.76735	-0.219907	3.38757		2.5591
15.408	1.19998	-11.4725		7.01673						7.19248	-0.221143	3.36274		1.77217
15.4647	1.18292	-11.0356		7.25792						-1.2317	-0.225368	3.38806		3.66564
17.4707	1.19107	-11.6285		9.1803						4.27523	-0.215356	3.39462		2.47392
6.9926	1.19328	-11.8498		-3.50562						-7.99762	-0.212933	3.45387		5.15683
20.8298	1.22791	-12.7687		12.8085						-0.607014	-0.209488	3.39701		3.52418
0.620156	1.22107	-11.6628		-10.9055						-10.3145	-0.206888	3.44681		5.58077
7.85517	1.19897	-11.3837		-1.96562						6.54868	-0.212444	3.43703		2.0458
9.39448	1.17809	-11.423		-0.355383						-4.63214	-0.221619	3.43083		4.4574
8.53653	1.28231	-13.0825		-2.13602						-11.2663	-0.212863	3.4175		5.81568
8.44192	1.19426	-10.9515		-0.869708						-7.1878	-0.221629	3.42491		5.01794
8.17014	1.1724	-11.9777		-2.39897						3.55162	-0.22031	3.48717		2.70471
3.18122	1.19886	-12		-8.1861						-2.77716	-0.215583	3.46307		4.06178
7.31978	1.21706	-12.75		-3.84137						0.644386	-0.210575	3.44378		3.30809
15.5964	1.15364	-11.0333		6.95944						-0.806824	-0.212753	3.3883		3.55995
8.78356	1.15878	-10.5758		-0.397607						-5.11076	-0.210921	3.42325		4.50122
9.64164	1.21742	-10.8181		0.919796						15.3979	-0.205774	3.41188		0.243389
12.3996	1.24541	-12.3954		3.04723						-6.11957	-0.225027	3.50061		4.87768
12.009	1.13056	-11.4096		2.16736						4.82519	-0.217225	3.44338		2.39523
8.93358	1.20692	-11.3296		-0.547494						-1.12739	-0.210837	3.42		3.6577
8.10497	1.23351	-12.9156		-2.918						3.64601	-0.224455	3.44871		2.63035
9.35752	1.14912	-10.0087		0.74423						-0.927201	-0.218517	3.34631		3.54892
3.05236	1.18443	-11.5591		-7.94377						-2.49335	-0.212901	3.39445		3.92528
4.20611	1.1604	-10.5599		-5.67915						-7.91608	-0.217103	3.40878		5.12739
4.54273	1.21446	-10.1977		-4.68071						0.36382	-0.222352	3.42147		3.34058
6.902	1.17787	-11.877		-3.74735						7.9471	-0.219438	3.466		1.72211
9.3334	1.19783	-12.4206		-1.2408						-8.28203	-0.206658	3.50094		5.21249
14.3951	1.18999	-11.3992		5.73081						-13.17	-0.215476	3.45134		6.28916
16.1342	1.22044	-11.6973		7.99354						4.17251	-0.216856	3.47131		2.56648
9.8198	1.19847	-9.70098		2.06773						0.239984	-0.219849	3.38481		3.33205
6.83288	1.26959	-11.1943		-2.5194						-0.0491897	-0.210583	3.39985		3.41021
13.1493	1.19464	-9.88145		5.82727						-3.98364	-0.219926	3.40628		4.28239
1.86599	1.21027	-11.6018		-9.34344						-2.60451	-0.223965	3.40503		3.98835
10.1854	1.18262	-11.273		0.772444						3.71323	-0.216878	3.43149		2.62617
4.65996	1.13555	-11.9325		-6.6409						-3.04661	-0.213043	3.43788		4.08694
8.5108	1.21407	-10.9717		-0.639045						-0.675002	-0.222017	3.36348		3.51334
6.73634	1.17043	-11.5857		-3.70133						-2.55253	-0.22807	3.46315		4.04531
14.7588	1.19542	-11.5137		6.12933						2.85035	-0.218453	3.39		2.76733
5.10899	1.16981	-12.6664		-6.68986						-5.91338	-0.207605	3.40372		4.63137
10.6752	1.17048	-10.8275		1.66771						3.93112	-0.222706	3.45348		2.578
11.8091	1.16337	-10.4728		3.26551						0.654722	-0.214313	3.41079		3.27048
11.9875	1.19388	-11.2841		3.02752						16.2894	-0.215023	3.36774		-0.134854
12.6852	1.1704	-11.8012		3.04552						-9.11545	-0.212966	3.41178		5.35307
10.0587	1.19586	-11.8987		0.130168						-7.70894	-0.219907	3.44958		5.14483
7.53089	1.16922	-11.6614		-2.85614						-9.86991	-0.217471	3.41951		5.56592
14.6235	1.21721	-10.2523		7.54759						-0.41055	-0.220026	3.43137		3.5217
0.692479	1.18604	-12.3072		-11.4858						-8.67177	-0.221908	3.44129		5.36562
1.79675	1.25708	-11.4776		-9.21897						10.1524	-0.212256	3.44703		1.29213
12.5812	1.17418	-12.8585		1.91396						-1.24251	-0.231508	3.35811		3.64577
6.98903	1.26666	-11.0348		-2.18205						-9.40246	-0.21402	3.34982		5.36214
11.0443	1.24465	-11.6602		2.08611						0.927132	-0.21231	3.49368		3.29684
2.97791	1.21799	-10.6842		-7.05717						2.98847	-0.225376	3.39138		2.71785
4.0773	1.25738	-12.3758		-7.24913						2.07388	-0.220399	3.44534		2.98826
6.31744	1.21975	-12.3113		-4.60559						-0.115557	-0.217904	3.42556		3.45074
13.3338	1.22525	-11.6821		4.65513						1.10049	-0.222488	3.44441		3.19956
9.23845	1.15387	-11.2627		-0.602747						-3.91655	-0.217391	3.42135		4.27277
15.6411	1.23193	-11.7661		7.50265						3.97403	-0.221205	3.40711		2.52804
8.18926	1.20213	-12.4496		-2.60508						-5.52554	-0.228312	3.45215		4.7137
10.4936	1.1977	-11.7891		0.779032						-4.53253	-0.219096	3.42284		4.4159
6.7578	1.20573	-10.5795		-2.43138						6.701	-0.218386	3.40018		1.93677
3.76825	1.23139	-10.4079		-5.76776						1.45897	-0.213764	3.40233		3.09045
10.2062	1.21122	-11.2024		1.15958						2.90053	-0.216603	3.40467		2.7764
14.5084	1.19557	-12.4795		4.86624						-1.03471	-0.225157	3.38649		3.61946
6.83792	1.23022	-12.0321		-3.61993						-2.83028	-0.220176	3.34267		3.96583
2.85576	1.22644	-11.1059		-7.60343						0.787978	-0.217746	3.4194		3.24782
4.77726	1.18654	-11.2816		-5.61323						6.77481	-0.222891	3.48003		1.96999
8.39835	1.24551	-11.0635		-0.603269						2.00536	-0.216554	3.46441		3.03014
8.08362	1.17526	-11.1548		-1.65443						8.42829	-0.206841	3.39892		1.65561
10.5228	1.16497	-11.6055		0.653349						-10.0681	-0.217218	3.48279		5.66975
7.87474	1.22441	-11.6594		-2.01751						-4.82296	-0.226368	3.38239		4.47416
7.91441	1.21608	-11.7516		-2.12709						6.64977	-0.219201	3.36039		1.90275
10.8602	1.24042	-12.0302		1.44103						-4.06372	-0.215209	3.44089		4.31544
8.80453	1.18305	-10.8464		-0.430182						-2.7188	-0.219163	3.42697		4.02283
10.7307	1.24162	-12.9344		0.389055						7.27563	-0.22461	3.38238		1.7482
14.6919	1.20883	-12.6629		5.0972						5.12571	-0.211543	3.468		2.38369
-1.1185	1.19813	-11.8191		-13.1592						5.53179	-0.206714	3.47968		2.33618
10.0947	1.20254	-12.6505		-0.51123						3.14362	-0.219429	3.31976		2.62996
14.8504	1.14029	-12.2938		4.63984						-2.47978	-0.214589	3.45977		3.99191
1.3922	1.21772	-12.1817		-10.4863						-4.65888	-0.21386	3.45064		4.44698
6.41648	1.21683	-12.746		-4.93824						-7.87392	-0.212405	3.48154		5.15401
5.34309	1.17892	-12.9613		-6.66218						2.5638	-0.218652	3.44046		2.87988
5.18172	1.17141	-11.6061		-5.53615						-1.51519	-0.221431	3.42059		3.7561
11.5663	1.22506	-11.7599		2.40962						-9.63867	-0.226377	3.43131		5.61328
-9.04512	1.18344	-12.4495		-23.1538						-1.46957	-0.214124	3.40514		3.71981
14.6054	1.21459	-11.2298		6.50969						8.46749	-0.216826	3.411		1.57502
8.32419	1.18273	-10.6873		-0.842042						-7.54779	-0.219912	3.40468		5.06453
7.54892	1.26719	-10.4414		-0.875452						-6.76904	-0.220037	3.43136		4.92079
8.48125	1.217	-12.6223		-2.30059						4.74046	-0.221432	3.38393		2.33424
5.86996	1.19701	-11.5685		-4.54208						-0.492225	-0.222458	3.34806		3.45756
13.0646	1.18381	-12.8112		2.65482						9.47199	-0.217578	3.42626		1.36537
3.80663	1.19754	-12.1662		-7.60759						5.47446	-0.221049	3.45413		2.24401
7.86933	1.18053	-11.5918		-2.30177						-2.87564	-0.214254	3.4086		4.02472
7.11875	1.18269	-12.3838		-3.96448						-2.83777	-0.226779	3.40351		4.04706
3.09694	1.20012	-11.5036		-7.78691						-3.19987	-0.217506	3.35183		4.04782
15.6122	1.23527	-11.7308		7.55447						-8.50372	-0.220991	3.40197		5.28121
4.68445	1.20288	-11.0441		-5.40929						-5.7807	-0.211468	3.34321		4.56564
4.9282	1.22607	-12.2491		-6.20682						3.19085	-0.215507	3.40678		2.71913
5.72111	1.11687	-11.8821		-5.49234						0.345453	-0.214783	3.45002		3.37583
10.6183	1.2493	-10.8455		2.41985						6.92542	-0.215845	3.46973		1.97492
11.9298	1.19521	-12.3256		1.933						7.65491	-0.217615	3.4538		1.78797
16.5396	1.22593	-11.7578		8.5187						-3.90115	-0.220186	3.45704		4.31602
7.9295	1.28201	-11.3782		-1.21249						-4.67919	-0.219356	3.54543		4.57184
7.63726	1.17591	-11.3246		-2.34385						-6.46994	-0.211873	3.42085		4.79166
9.82905	1.18154	-12.3352		-0.721747						4.88118	-0.215	3.41891		2.36946
11.7339	1.2227	-12.3428		2.00423						-1.15318	-0.21578	3.37208		3.62091
7.99618	1.19385	-11.6009		-2.05464						-9.22901	-0.206154	3.36643		5.26903
5.66948	1.27178	-9.87415		-2.66384						-7.71544	-0.21938	3.40198		5.09459
9.25147	1.23202	-11.8191		-0.421093						-0.25971	-0.219319	3.42529		3.48225
5.29054	1.20921	-10.8811		-4.48374						-3.1036	-0.21232	3.50568		4.16464
7.42352	1.19437	-10.8885		-2.02215						5.80409	-0.220309	3.40152		2.12282
11.2381	1.21289	-12.6274		1.00317						-5.85808	-0.211162	3.38528		4.62228
0.796324	1.26416	-11.6954		-10.6887						-4.19373	-0.214046	3.44503		4.34268
11.4699	1.19804	-11.376		2.36538						-6.53537	-0.209473	3.46855		4.83753
10.8143	1.22089	-11.7206		1.48248						4.43533	-0.219283	3.43788		2.46529
2.56251	1.22301	-10.4435		-7.30952						-10.368	-0.216339	3.47871		5.72171
6.62536	1.1953	-12.4949		-4.57559						5.80071	-0.216216	3.37473		2.12053
3.56187	1.18515	-9.35507		-5.13373						2.45937	-0.215205	3.3514		2.82213
12.7989	1.21872	-13.248		2.35028						2.12285	-0.210224	3.42695		2.98068
8.30052	1.23628	-11.6277		-1.36593						2.1517	-0.219091	3.462		2.99058
11.8959	1.17114	-12.752		1.1798						-4.02593	-0.213884	3.40898		4.27006
-3.77102	1.19488	-11.1706		-15.6765						-6.53105	-0.217401	3.4213		4.84116
7.53494	1.23322	-12.1757		-2.88347						-2.47261	-0.21553	3.38795		3.92087
5.76084	1.14842	-11.8089		-5.19306						2.0051	-0.214911	3.49057		3.05965
12.9047	1.17224	-10.9322		4.19531						3.20023	-0.212292	3.43945		2.76006
5.79168	1.21472	-10.411		-3.37575						-3.14012	-0.220471	3.47388		4.16619
9.63161	1.18098	-11.9032		-0.528399						-3.13007	-0.223157	3.44684		4.14534
5.255	1.18742	-10.8273		-4.58741						0.112326	-0.22209	3.34756		3.32261
7.75089	1.22727	-12.2661		-2.75373						1.05539	-0.213714	3.48269		3.25714
6.95115	1.20503	-11.758		-3.3816						-2.18431	-0.212627	3.3162		3.78064
5.74855	1.24721	-10.2374		-3.06772						13.0714	-0.219149	3.35411		0.48953
11.7765	1.10109	-10.6729		2.29399						3.39655	-0.218727	3.40576		2.66285
3.38963	1.20822	-11.4323		-7.33691						-4.21081	-0.223941	3.38327		4.32625
7.25997	1.25489	-12.2854		-3.17491						1.00861	-0.213523	3.38556		3.1702
10.8702	1.23954	-12.9806		0.493441						6.36787	-0.213605	3.38832		2.02811
0.336006	1.25723	-10.5096		-10.0872						-1.94948	-0.214422	3.44729		3.8653
14.8971	1.21623	-11.2271		6.89134						-8.59641	-0.229359	3.49894		5.4706
10.1571	1.26141	-11.8621		0.95015						-0.377132	-0.210537	3.39359		3.47299
18.0793	1.17593	-11.7153		9.54465						-1.98419	-0.223271	3.36007		3.80308
11.399	1.24777	-11.5769		2.64651						1.32433	-0.206472	3.41538		3.14194
10.7491	1.17841	-10.6858		1.98107						-8.57678	-0.210036	3.44199		5.24342
9.62808	1.1235	-12.5436		-1.72645						4.4881	-0.213714	3.36991		2.41074
12.0802	1.2626	-12.34		2.91246						4.47555	-0.223081	3.43495		2.43654
14.3118	1.19369	-11.3825		5.70142						4.93733	-0.21921	3.40479		2.32248
16.7224	1.22925	-13.1341		7.4218						1.15024	-0.222071	3.4549		3.19946
8.00068	1.1177	-12.0063		-3.06389						-7.56102	-0.213054	3.46381		5.07472
16.0078	1.23811	-11.9692		7.85027						8.73431	-0.223242	3.3536		1.40374
11.3799	1.18548	-11.1543		2.33635						-0.259638	-0.206922	3.3122		3.36593
14.5207	1.2436	-11.9408		6.1171						6.40624	-0.215066	3.44431		2.06654
5.53342	1.21012	-10.5325		-3.83644						5.83411	-0.211989	3.41703		2.18026
15.3051	1.17228	-10.922		7.01985						7.20342	-0.224455	3.40066		1.78382
15.6626	1.15707	-10.0734		8.04923						7.07647	-0.220779	3.41422		1.85189
9.94221	1.23087	-12.5077		-0.27011						-5.91018	-0.224968	3.47963		4.80924
14.4542	1.17309	-10.7002		6.25584						5.84765	-0.220418	3.36557		2.07665
7.89755	1.21761	-11.417		-1.80092						-4.21759	-0.216037	3.41995		4.3311
12.9419	1.18175	-11.4005		3.89365						-0.0236881	-0.218449	3.37663		3.3818
5.37631	1.12955	-10.6205		-4.54764						0.0394509	-0.215404	3.3783		3.3698
13.401	1.20982	-10.3034		5.90941						2.52562	-0.223585	3.43651		2.87182
15.118	1.1965	-11.5499		6.53876						0.77233	-0.219236	3.52262		3.35329
4.34273	1.26477	-12.2168		-6.72425						-0.414732	-0.218219	3.41101		3.50151
8.74754	1.26859	-12.253		-1.1559						3.32415	-0.207625	3.39185		2.70167
2.01972	1.1608	-11.0813		-8.73681						-0.894264	-0.221812	3.41958		3.61794
13.4466	1.21696	-12.1332		4.23081						-6.2745	-0.216842	3.43745		4.79802
12.0483	1.21082	-10.1112		4.47709						-0.17447	-0.218946	3.43111		3.46931
14.1882	1.17254	-13.5019		3.13431						4.20877	-0.214806	3.39697		2.4929
3.47946	1.22523	-11.7284		-7.46525						5.21528	-0.215347	3.36946		2.24636
11.4293	1.17244	-11.1675		2.23273						-9.15553	-0.211602	3.46004		5.39737
4.59585	1.19084	-11.3298		-5.85684						-12.1058	-0.218568	3.47154		6.11748
16.2502	1.23605	-11.7751		8.31096						5.28915	-0.216124	3.41478		2.27167
10.1782	1.19658	-11.4778		0.701273						-1.83059	-0.221642	3.38984		3.79557
15.8718	1.22432	-9.86588		9.56623						3.97274	-0.215337	3.4907		2.63522
8.16436	1.19041	-12.1897		-2.47076						10.6165	-0.220007	3.37743		1.04171
4.63353	1.18263	-11.778		-6.29826						5.49446	-0.215652	3.4672		2.28231
6.27612	1.13872	-13.2802		-6.13345						-4.12218	-0.214195	3.44729		4.33024
10.043	1.16057	-12.1376		-0.482001						4.32616	-0.220339	3.32969		2.37647
1.48288	1.17442	-9.94886		-8.20732						0.141986	-0.222236	3.42463		3.39307
10.5316	1.24463	-11.375		1.73299						8.96219	-0.208272	3.44454		1.57797
9.36392	1.15675	-11.7348		-0.903145						-2.75211	-0.219283	3.42541		4.0289
9.54007	1.25798	-11.7682		0.233047						-8.27302	-0.216789	3.42209		5.21559
14.4325	1.23525	-10.8746		6.95317						2.15278	-0.208668	3.43792		2.9887
2.18279	1.19059	-12.1206		-9.52183						-0.162071	-0.223328	3.41765		3.45385
9.04376	1.18236	-11.8639		-1.17089						4.3937	-0.214791	3.47153		2.52781
8.99765	1.1855	-12.2299		-1.56314						5.25746	-0.216172	3.38315		2.24664
15.8365	1.19251	-10.7532		8.13197						-8.39264	-0.200309	3.46463		5.14575
12.5502	1.22432	-12.1073		3.25822						1.52162	-0.21971	3.41382		3.07951
7.67647	1.15898	-10.4295		-1.53256						-5.32276	-0.220722	3.41812		4.59297
11.35	1.19052	-12.1011		1.41136						4.93092	-0.210578	3.44706		2.40871
-0.239468	1.2067	-10.6645		-10.9535						1.00524	-0.221597	3.43045		3.20769
2.58369	1.20587	-11.7479		-8.63232						-2.75899	-0.22382	3.45218		4.0697
5.46158	1.21063	-12.0635		-5.45152						-5.91158	-0.210395	3.36381		4.60758
4.70047	1.25422	-11.6021		-5.70669						-5.20489	-0.212264	3.40493		4.50974
4.10721	1.22538	-11.3815		-6.34857						-3.9419	-0.205537	3.42047		4.23067
3.2854	1.14309	-11.8644		-8.10885						-1.13665	-0.216464	3.38879		3.63484
13.1987	1.15142	-10.7551		4.44213						-4.64137	-0.227793	3.38766		4.44493
16.6095	1.16256	-12.033		7.2765						-6.14852	-0.223689	3.38015		4.75551
9.34644	1.19128	-11.0255		0.108691						7.56871	-0.214009	3.42394		1.80417
12.0931	1.19497	-10.6064		3.84456						-0.0281963	-0.227832	3.43254		3.43897
7.37014	1.17284	-9.80208		-1.15808						3.25223	-0.206286	3.45326		2.78237
12.4161	1.15977	-10.5493		3.85048						5.62214	-0.22652	3.3614		2.08787
22.0322	1.17186	-12.0677		13.7509						-2.37203	-0.214997	3.32715		3.83713
9.78751	1.17931	-12.4435		-0.900925						-2.7918	-0.214264	3.4064		4.00458
2.01845	1.19048	-11.8848		-9.48183						-1.00783	-0.216651	3.43894		3.65728
9.95265	1.17447	-12.1441		-0.45503						-6.60685	-0.226523	3.42986		4.92647
3.07435	1.22419	-11.7279		-7.96429						-1.25059	-0.217151	3.51222		3.78379
11.9786	1.19229	-11.2273		3.05457						-1.41178	-0.222244	3.35683		3.67059
12.5622	1.17594	-11.8448		2.92769						0.718545	-0.218929	3.43268		3.27537
8.47031	1.19741	-12.3434		-2.20092						6.08209	-0.207243	3.45999		2.19952
15.1336	1.16371	-12.0167		5.5944						2.50967	-0.212068	3.40881		2.87659
6.19779	1.15591	-10.7858		-3.62169						0.7692	-0.220499	3.44145		3.27185
2.87887	1.21329	-10.9498		-7.45693						1.91575	-0.220398	3.45499		3.03276
2.83043	1.19439	-11.2127		-7.83206						-5.63861	-0.210347	3.37478		4.56084
4.16248	1.15404	-10.9678		-6.16414						4.04807	-0.211743	3.46104		2.60389
9.28299	1.19342	-10.8078		0.270742						0.232854	-0.214499	3.37777		3.32783
6.01671	1.23227	-12.4498		-5.0356						4.19812	-0.224516	3.42073		2.47818
15.3948	1.22969	-10.9587		7.97205						-5.93137	-0.221483	3.38388		4.69758
9.41879	1.24477	-11.9383		-0.214095						-4.46194	-0.213175	3.42084		4.37201
2.88038	1.14115	-9.35434		-6.06739						5.86433	-0.221884	3.45985		2.15865
0.970262	1.13109	-11.7218		-10.6243						0.428982	-0.223843	3.43728		3.34125
4.71323	1.2227	-12.6009		-6.83798						-1.97818	-0.213608	3.4245		3.84705
2.39257	1.1702	-12.3358		-9.53608						2.51658	-0.210547	3.45898		2.92912
-1.61933	1.19663	-12.1551		-14.0928						4.24212	-0.221752	3.45653		2.51583
4.78348	1.19822	-11.7017		-5.9701						2.83777	-0.216117	3.43738		2.82409
1.92578	1.20128	-11.9146		-9.60122						3.35877	-0.210754	3.46434		2.75646
8.16096	1.18628	-11.7996		-2.11842						0.28228	-0.214288	3.36563		3.30514
8.07153	1.2101	-11.1938		-1.42645						-11.7377	-0.220491	3.39151		5.97956
13.9826	1.21631	-11.9333		5.0739						1.30319	-0.220539	3.45724		3.16984
5.02441	1.20156	-11.6453		-5.6082						-9.95747	-0.223781	3.39683		5.62512
14.1722	1.20018	-11.5528		5.45642						1.29814	-0.215347	3.41203		3.13248
3.68414	1.15826	-11.2719		-7.00469						-9.11988	-0.225863	3.27909		5.33894
12.0244	1.21575	-11.6507		2.96795						5.7304	-0.219465	3.42497		2.16735
13.2808	1.19842	-12.0816		3.83435						4.69012	-0.217755	3.40302		2.38172
7.11005	1.27395	-12.6733		-3.61548						2.05184	-0.215049	3.39001		2.94876
10.5475	1.1541	-12.3391		-0.166241						-2.08283	-0.222647	3.45619		3.91992
17.5083	1.17466	-11.0374		9.52888						9.18765	-0.203124	3.39731		1.53109
13.9002	1.16272	-12.0891		4.0729						-6.65525	-0.226548	3.42339		4.93112
10.0456	1.22853	-11.8891		0.452201						0.381661	-0.213426	3.40728		3.32582
11.3523	1.20336	-13.3467		0.314197						-11.0631	-0.203405	3.44197		5.69227
5.90189	1.20841	-12.9756		-5.84373						3.55867	-0.220027	3.40419		2.62119
6.3307	1.1421	-10.6191		-3.38885						-3.38435	-0.215478	3.44035		4.1696
15.339	1.22347	-12.713		6.05374						8.2146	-0.211118	3.34232		1.60808
7.27222	1.09964	-11.9947		-3.99783						2.45715	-0.214443	3.48896		2.96204
7.84685	1.18851	-11.7839		-2.45782						3.40242	-0.227557	3.42254		2.64829
13.8118	1.13958	-12.222		3.51754						0.837738	-0.223869	3.38044		3.1929
4.32819	1.17741	-11.4462		-6.35015						-8.65259	-0.214761	3.33414		5.19238
-2.18208	1.20366	-11.7025		-14.329						5.18094	-0.22457	3.48172		2.31824
12.6798	1.15865	-10.6295		4.06182						1.78608	-0.213893	3.44914		3.06711
9.41894	1.13028	-12.514		-1.86792						-5.57465	-0.216554	3.36953		4.57674
9.31567	1.19253	-11.712		-0.602782						2.07277	-0.226703	3.46649		2.99659
5.9763	1.20342	-12.9602		-5.76818						6.99338	-0.218358	3.45531		1.92825
10.6392	1.2217	-11.7229		1.27499						4.59471	-0.218357	3.42041		2.41712
8.23908	1.1452	-12.2556		-2.82022						-2.62349	-0.218197	3.4453		4.01773
4.58702	1.20009	-11.2245		-5.71962						0.862038	-0.210301	3.33069		3.1494
8.22531	1.20399	-10.6767		-0.773462						-3.13459	-0.224155	3.38637		4.08901
11.9166	1.18568	-11.9087		2.22063						-4.75415	-0.213891	3.45326		4.47013
4.82658	1.19604	-12.7155		-6.94275						-0.418368	-0.227453	3.41899		3.51414
7.62902	1.20073	-9.35694		-0.196553						-0.642661	-0.21978	3.48909		3.63033
10.0493	1.2282	-11.0435		1.2991						-0.448846	-0.222688	3.50484		3.60479
4.25306	1.20126	-11.5894		-6.48037						3.88066	-0.216289	3.38821		2.54887
11.7804	1.18154	-10.2957		3.62331						-11.0019	-0.215973	3.53971		5.91582
3.78211	1.20222	-12.0582		-7.51131						-6.60177	-0.218955	3.43876		4.88425
10.937	1.2315	-11.9779		1.49105						-9.43913	-0.215955	3.36771		5.40614
4.04467	1.2376	-12.3006		-7.29493						1.22096	-0.222806	3.40115		3.12911
7.91289	1.2046	-12.3452		-2.81336						3.59406	-0.217555	3.43579		2.65388
22.2112	1.19984	-11.6654		14.9845						-1.06311	-0.217948	3.35887		3.59057
10.9186	1.19006	-10.5427		2.45112						3.94331	-0.223529	3.43239		2.55095
9.24026	1.14979	-12.8234		-2.19907						-3.01005	-0.225761	3.51219		4.19174
11.0904	1.17464	-11.4462		1.58105						-4.60303	-0.225141	3.39005		4.42638
13.0663	1.17863	-11.7279		3.67241						-8.80033	-0.217905	3.45139		5.36903
17.3283	1.24947	-11.13		10.5213						-5.14154	-0.220638	3.44702		4.58144
20.3353	1.19697	-11.8298		12.5109						-7.56882	-0.219717	3.37812		5.04112
8.92496	1.19762	-11.927		-1.23824						4.9273	-0.213936	3.36678		2.31265
-0.151232	1.17254	-12.6706		-12.848						-5.15371	-0.20811	3.48814		4.56068
18.1543	1.21985	-11.3509		10.7945						-1.70183	-0.221171	3.55553		3.93192
9.61441	1.22323	-11.9751		-0.214495						-3.5456	-0.218896	3.48789		4.26401
6.6929	1.22133	-10.8049		-2.6307						-1.19215	-0.209242	3.46609		3.71554
10.7323	1.23173	-11.288		1.93129						-1.50564	-0.223006	3.42161		3.75737
8.1	1.22275	-13.8468		-3.9425						1.49469	-0.215326	3.4295		3.10766
8.75622	1.2013	-11.996		-1.47722						1.20464	-0.215892	3.4347		3.17463
13.4849	1.25192	-11.1486		5.7335						2.9127	-0.221343	3.38472		2.74001
11.5851	1.19348	-12.0016		1.82499						3.67418	-0.223376	3.53162		2.71089
0.381243	1.20207	-11.0782		-10.6199						-9.00528	-0.213921	3.44098		5.3674
8.25567	1.20443	-12.1646		-2.2212						1.29096	-0.22429	3.42281		3.13326
12.2885	1.2558	-12.3545		3.07741						-9.02781	-0.21607	3.45733		5.40797
14.3611	1.25508	-10.8209		7.20342						-2.16809	-0.208223	3.44464		3.89609
7.27508	1.20548	-10.8842		-2.11419						1.22781	-0.208311	3.3513		3.09554
10.2755	1.21369	-11.3199		1.15141						1.23175	-0.205251	3.43658		3.18376
8.50319	1.31177	-10.6987		0.455548						-4.20004	-0.211659	3.47		4.35897
11.9234	1.23526	-12.043		2.68549						-1.57555	-0.219073	3.42374		3.7689
11.365	1.19103	-12.59		0.94608						-0.183617	-0.218165	3.46563		3.50568
12.5767	1.19354	-11.4705		3.54031						2.4007	-0.216251	3.41344		2.89429
1.01642	1.22012	-11.076		-9.83585						-6.45715	-0.213092	3.47753		4.8535
11.2559	1.19211	-12.1554		1.26294						2.36136	-0.209467	3.2973		2.80267
9.6323	1.18002	-11.5603		-0.193972						-4.8996	-0.218006	3.43003		4.49818
14.2799	1.17042	-11.6574		5.05607						1.96892	-0.217304	3.4708		3.04294
10.9384	1.19927	-11.2983		1.8197						-5.12983	-0.217441	3.38283		4.49826
5.536	1.18727	-11.3077		-4.73497						-6.26794	-0.20934	3.38116		4.69329
1.77502	1.21052	-10.464		-8.31529						-3.84417	-0.216888	3.44554		4.27929
10.7345	1.19575	-12.086		0.749709						-12.0853	-0.216977	3.43561		6.05783
5.92942	1.17569	-10.7777		-3.80658						0.0695367	-0.204084	3.32642		3.31223
4.39656	1.19638	-11.3744		-6.11442						-1.80882	-0.227422	3.40871		3.82007
0.827558	1.15396	-12.6694		-11.7145						-3.20886	-0.214164	3.3383		4.02552
7.56975	1.16368	-11.2695		-2.46078						11.5263	-0.213112	3.40429		0.9479
8.52896	1.18949	-11.593		-1.44795						2.90443	-0.217621	3.37274		2.74067
5.82299	1.18143	-11.2865		-4.40705						4.40728	-0.222727	3.3707		2.38908
5.82188	1.26719	-12.9103		-5.53292						-6.08137	-0.210154	3.45499		4.73302
7.97077	1.17104	-10.5745		-1.24041						4.49878	-0.220582	3.39852		2.40617
8.95102	1.1903	-11.8043		-1.14988						-0.728006	-0.211748	3.37405		3.5282
8.98865	1.20296	-11.2672		-0.4542						7.7624	-0.221711	3.49518		1.77417
7.88679	1.14483	-11.5278		-2.49882						1.80423	-0.213732	3.40111		3.01549
10.0262	1.20842	-11.5894		0.526448						-2.68749	-0.218997	3.40769		3.99625
9.55317	1.2074	-11.6836		-0.149091						-7.3151	-0.215698	3.4036		4.98145
1.28279	1.22862	-11.6753		-10.0993						-7.84447	-0.210895	3.4395		5.09386
9.64793	1.23239	-10.6512		1.23881						-2.19167	-0.21908	3.32299		3.80314
6.14846	1.22319	-11.7059		-4.18517						-5.08234	-0.214542	3.38443		4.47481
8.54685	1.14212	-12.1669		-2.40543						9.00361	-0.229121	3.44852		1.38561
8.32919	1.14805	-11.828		-2.26566						6.82828	-0.209	3.40184		1.97474
10.873	1.18736	-10.8434		2.06679						-8.4007	-0.215166	3.40031		5.20786
4.81895	1.20074	-12.6671		-6.88081						10.8094	-0.220337	3.40787		1.02617
5.75664	1.18024	-10.9693		-4.17503						-2.42171	-0.207192	3.3376		3.83936
16.3048	1.25614	-10.8113		9.66988						0.198446	-0.219192	3.51194		3.46844
7.41736	1.14055	-11.4792		-3.01928						1.77251	-0.225854	3.39957		2.99924
4.30396	1.20026	-10.4561		-5.29022						-7.24097	-0.216257	3.39666		4.96257
2.3561	1.19149	-11.5843		-8.77702						-8.10669	-0.221067	3.45641		5.24853
7.61419	1.1735	-13.1857		-4.25045						-6.59612	-0.218089	3.45749		4.89603
14.0134	1.21594	-12.7909		4.24856						-1.76868	-0.217377	3.41586		3.80033
11.9432	1.27755	-11.9315		3.32645						2.7632	-0.221225	3.45183		2.84054
4.8416	1.19309	-11.6954		-5.91897						3.25843	-0.219675	3.43095		2.71516
11.0249	1.12893	-11.964		0.482442						3.89509	-0.227416	3.56805		2.68225
11.8656	1.25182	-11.8451		3.0085						2.82759	-0.212886	3.40303		2.80108
5.90907	1.21431	-12.4531		-5.27764						7.67543	-0.222877	3.36592		1.65525
1.97005	1.18829	-12.4666		-10.1256						0.689854	-0.219748	3.36481		3.21321
7.65606	1.18009	-12.7164		-3.68161						-9.99327	-0.215561	3.4131		5.56726
11.7177	1.18687	-11.6664		2.24106						0.330206	-0.210188	3.38488		3.31547
2.34806	1.20334	-12.2678		-9.44227						8.68802	-0.221882	3.42812		1.5004
12.4651	1.19563	-11.3233		3.58033						0.573749	-0.215613	3.38417		3.26047
13.0029	1.21896	-12.1026		3.74746						4.54424	-0.216567	3.50147		2.51733
-2.00324	1.19616	-11.0388		-13.435						2.45228	-0.20652	3.38623		2.87979
9.17027	1.16996	-11.368		-0.639211						-10.7594	-0.216333	3.49447		5.82208
14.2379	1.21132	-9.39157		7.85508						-6.82786	-0.207842	3.47236		4.89148
3.64403	1.1993	-12.4415		-8.07122						2.87289	-0.210789	3.39013		2.78456
9.402	1.22353	-12.9233		-1.41973						6.06641	-0.212231	3.44043		2.15295
9.39488	1.25875	-10.2222		1.60355						0.282254	-0.213089	3.45133		3.39119
8.9528	1.20947	-12.1778		-1.34963						-1.32397	-0.223112	3.37054		3.66594
4.50358	1.16016	-11.3453		-6.1205						-2.12937	-0.213619	3.45608		3.91096
6.41936	1.22277	-11.2832		-3.43382						7.80463	-0.212233	3.40759		1.75119
7.88205	1.20832	-11.1865		-1.66238						3.71653	-0.211453	3.37877		2.5929
14.2334	1.18586	-12.5872		4.29155						5.02259	-0.221125	3.43578		2.32516
0.425363	1.22911	-12.4232		-11.9003						-1.92826	-0.213109	3.48772		3.89865
6.87685	1.22513	-12.4908		-4.06576						2.50028	-0.220015	3.42138		2.87127
11.648	1.19625	-10.5572		3.37664						4.57423	-0.216272	3.37935		2.39008
6.61986	1.16127	-12.6834		-4.99596						4.99557	-0.2225	3.4325		2.32099
18.668	1.17179	-11.6536		10.2212						-3.34818	-0.217626	3.50079		4.22944
8.62567	1.14908	-11.7266		-1.81503						-0.674935	-0.219511	3.44334		3.59149
3.94695	1.17551	-10.1338		-5.49409						-3.36469	-0.219253	3.36456		4.10228
0.341935	1.25838	-11.3293		-10.899						2.96393	-0.216923	3.38117		2.73822
10.6783	1.22627	-9.99473		3.09969						-10.5523	-0.222562	3.43741		5.78595
-0.0669142	1.16103	-13.3842		-13.4619						-5.263	-0.210401	3.46085		4.56818
6.15688	1.19235	-11.1387		-3.79757						6.87216	-0.2082	3.42388		1.9931
2.52919	1.22694	-10.2882		-7.18506						-6.51728	-0.214156	3.43517		4.83088
7.39397	1.18382	-11.8041		-3.05097						-1.80831	-0.222886	3.45779		3.86083
10.1683	1.25516	-11.8726		0.890245						-8.09387	-0.217646	3.45869		5.22028
13.0623	1.19214	-10.8882		4.68389						-3.36478	-0.223389	3.32115		4.0728
20.1274	1.19438	-11.0329		13.0068						4.62746	-0.225785	3.41753		2.37272
2.62341	1.15919	-11.8887		-8.84769						8.7534	-0.213797	3.38536		1.51391
8.90211	1.11602	-12.0652		-2.1303						-6.09858	-0.213674	3.41261		4.71571
9.9519	1.17524	-11.909		-0.213225						2.24398	-0.225489	3.42291		2.91692
6.29263	1.22717	-12.4282		-4.70608						-3.69604	-0.214328	3.4186		4.21076
12.5039	1.17019	-12.0298		2.60222						8.19947	-0.214085	3.4698		1.71442
4.61146	1.21861	-11.4135		-5.79387						-1.21428	-0.219332	3.36699		3.63332
11.6167	1.2364	-11.5475		2.81535						-0.0969784	-0.208004	3.3622		3.38237
8.15466	1.19003	-11.9429		-2.23864						0.0149789	-0.218993	3.47975		3.47647
15.5386	1.25214	-11.5142		7.9423						7.45036	-0.218959	3.37962		1.74829
21.9446	1.17836	-11.9302		13.9286						-0.7581	-0.219954	3.42269		3.58944
12.7009	1.2281	-11.6194		3.97867						0.310816	-0.221252	3.3987		3.32993
9.65189	1.24757	-11.0769		0.964486						-11.8143	-0.2189	3.41432		6.00046
5.73712	1.18723	-11.8602		-5.04896						-10.4722	-0.210609	3.4982		5.70374
2.39824	1.23226	-11.6578		-8.70259						3.18898	-0.221505	3.46563		2.75926
8.05208	1.22559	-11.8909		-2.02239						4.66479	-0.222136	3.39424		2.35803
3.23295	1.13013	-11.5786		-7.92499						-5.01833	-0.22185	3.34068		4.45399
5.94917	1.14587	-10.6462		-3.82922						6.0813	-0.223265	3.45976		2.10201
9.31863	1.19875	-10.3809		0.789752						-5.36463	-0.222593	3.34501		4.53914
11.2206	1.15492	-11.61		1.34896						7.66152	-0.208375	3.41616		1.81969
8.65639	1.25081	-11.9249		-1.09735						-8.06694	-0.218361	3.43165		5.19315
6.79636	1.20061	-11.4082		-3.24846						-5.66369	-0.223109	3.43524		4.69886
8.34597	1.13625	-12.5102		-3.02708						-0.65629	-0.226548	3.40258		3.55126
2.06211	1.19544	-12.9355		-10.4704						-4.26015	-0.215225	3.3975		4.31439
8.86013	1.22895	-11.2631		-0.374417						1.81173	-0.219932	3.34102		2.94257
10.704	1.20403	-11.8571		1.03074						-6.81285	-0.218266	3.47433		4.96134
14.5391	1.19446	-10.8475		6.51892						-11.4319	-0.223614	3.42498		5.9813
7.37089	1.19655	-12.082		-3.26239						-0.945383	-0.225655	3.48911		3.70244
15.783	1.19772	-12.2305		6.67301						11.3016	-0.221187	3.46028		0.960511
7.97922	1.25814	-11.9986		-1.95958						-9.45408	-0.217769	3.36569		5.42449
13.9289	1.23978	-11.0237		6.24506						-8.72118	-0.223441	3.46547		5.41413
14.4032	1.22434	-10.4512		7.18326						3.41257	-0.218199	3.3679		2.62328
17.5456	1.16741	-12.0033		8.47958						-5.55436	-0.226513	3.37509		4.63322
8.55934	1.1907	-12.5062		-2.3146						10.2798	-0.216419	3.46018		1.23544
0.0876319	1.2132	-11.5236		-11.4173						5.59084	-0.224236	3.36324		2.10957
5.58958	1.14728	-10.7596		-4.34682						-7.18819	-0.223674	3.44554		5.05335
5.28401	1.15759	-11.0246		-4.90785						0.603898	-0.215704	3.41446		3.28419
10.916	1.12539	-10.107		2.17777						-8.5483	-0.218555	3.44853		5.3168
16.9672	1.20923	-11.9872		8.53002						5.10884	-0.219033	3.48081		2.3618
17.4361	1.21977	-12.088		9.18012						-4.66304	-0.21567	3.39326		4.39893
12.0139	1.11839	-10.2036		3.23262						0.685639	-0.21921	3.48845		3.33815
14.1501	1.16338	-11.1479		5.31403						-1.02	-0.214259	3.5049		3.72344
17.2058	1.14574	-11.8985		7.81488						1.69692	-0.208996	3.44269		3.08804
-0.439464	1.21376	-11.7185		-12.2519						2.01257	-0.220132	3.39561		2.95258
6.58475	1.2188	-13.0519		-5.02643						0.595248	-0.221099	3.46075		3.32915
13.7984	1.22426	-12.0332		4.85959						5.31506	-0.206915	3.42995		2.33019
12.9477	1.23901	-12.3066		3.73578						-2.87084	-0.215862	3.44571		4.06541
7.56773	1.22859	-10.9215		-1.62387						3.55139	-0.223719	3.47707		2.68256
13.4664	1.16249	-12.2497		3.40483						-5.67694	-0.224097	3.44851		4.72069
13.7795	1.23763	-12.5492		4.50473						-7.31762	-0.221365	3.44237		5.06223
9.42953	1.21421	-11.6593		-0.209877						-4.1063	-0.221694	3.33988		4.25022
12.0504	1.17585	-10.4252		3.74433						6.065	-0.220727	3.33856		1.99985
10.6423	1.20196	-11.311		1.48056						5.37003	-0.222648	3.42604		2.23042
13.9293	1.20551	-12.1524		4.63949						-6.00582	-0.221798	3.49156		4.82365
3.5776	1.18489	-11.218		-6.97894						-2.473	-0.22859	3.45302		4.01832
7.43413	1.19676	-11.7205		-2.82365						-2.7661	-0.211929	3.35832		3.94454
2.0214	1.28834	-10.0441		-7.43988						-3.58388	-0.213266	3.43315		4.19747
8.69325	1.25695	-11.1732		-0.246285						-11.318	-0.215947	3.46441		5.9085
13.9894	1.17618	-11.1731		5.28095						2.46664	-0.217059	3.37971		2.8443
16.2818	1.20467	-13.1481		6.46603						-1.79096	-0.217082	3.3448		3.73359
6.47716	1.22802	-10.1046		-2.15051						-2.10395	-0.213157	3.34293		3.7914
7.90456	1.1721	-11.8505		-2.58549						-2.59773	-0.215085	3.40631		3.96504
7.06284	1.1441	-12.192		-4.11139						8.2748	-0.221731	3.44949		1.61472
-0.37211	1.19056	-11.9804		-12.4234						6.11719	-0.213075	3.43896		2.13555
9.90805	1.22557	-10.8578		1.2852						-0.968009	-0.220733	3.41841		3.63208
6.28466	1.18684	-12.1051		-4.64617						-8.44234	-0.22285	3.39897		5.28035
6.89948	1.2181	-12.2605		-3.85624						5.11333	-0.226476	3.44737		2.28932
3.04256	1.13987	-12.6966		-9.22843						-3.66747	-0.213466	3.44906		4.23194
15.8983	1.24787	-11.8455		7.99344						-5.62227	-0.210331	3.42819		4.61073
11.9094	1.22008	-11.6841		2.84632						-8.75543	-0.212451	3.43982		5.29992
12.8934	1.17093	-10.7528		4.34448						-5.79831	-0.217431	3.35455		4.61528
0.57154	1.20975	-12.9084		-12.217						-3.53381	-0.221329	3.4849		4.26703
7.91369	1.2071	-10.4947		-0.942172						5.76777	-0.224023	3.49597		2.20386
13.5579	1.25479	-11.0635		5.94874						2.81573	-0.223562	3.46802		2.83853
3.91129	1.16928	-12.096		-7.52257						-8.16168	-0.219422	3.43707		5.22792
9.29061	1.21968	-10.6138		0.717744						7.05052	-0.215272	3.45201		1.93423
15.6464	1.16788	-10.4355		7.83758						6.58094	-0.224282	3.4679		1.99192
11.6496	1.19595	-11.5677		2.36475						-10.7047	-0.218211	3.43425		5.77014
9.65871	1.22734	-12.0007		-0.14617						2.88131	-0.216157	3.49784		2.87502
9.6781	1.18904	-12.0154		-0.507782						6.40368	-0.227601	3.40199		1.94451
12.5465	1.17961	-10.168		4.63204						-8.65342	-0.214832	3.35811		5.21715
17.4459	1.17989	-11.497		9.08717						-6.11683	-0.212642	3.39076		4.69145
8.34405	1.23892	-11.5878		-1.25019						-4.23128	-0.215758	3.42064		4.33358
8.14317	1.20206	-11.1382		-1.34961						4.68277	-0.214378	3.43451		2.43063
4.98914	1.20447	-9.6456		-3.63633						-11.5446	-0.215397	3.47568		5.96235
16.1599	1.17269	-10.0827		8.86785						1.03606	-0.218002	3.37997		3.1541
11.7757	1.11542	-11.9173		1.21742						-6.18159	-0.212004	3.42581		4.73633
11.9286	1.18039	-11.0249		3.05551						-0.126997	-0.217211	3.43363		3.46121
5.46185	1.24593	-11.0761		-4.271						-0.930899	-0.213839	3.42895		3.62801
7.55603	1.28325	-13.0638		-3.36752						-0.968989	-0.218437	3.42745		3.63911
9.57216	1.15001	-10.4975		0.510625						1.93466	-0.220468	3.44739		3.02085
19.8857	1.22593	-12.2878		12.0905						7.31259	-0.220757	3.48071		1.8664
8.05726	1.23619	-10.8601		-0.899865						-4.94552	-0.2257	3.45255		4.56875
10.2991	1.25621	-11.6407		1.29703						2.12273	-0.217329	3.42839		2.96706
8.9774	1.22068	-12.5873		-1.62877						9.17208	-0.220868	3.39888		1.37306
9.18444	1.14067	-10.8731		-0.39671						-2.88084	-0.221442	3.46337		4.1013
18.9524	1.19394	-10.5113		12.1168						-1.56285	-0.224157	3.42714		3.77746
5.10102	1.2301	-12.6964		-6.42157						5.40348	-0.223355	3.45364		2.24674
14.319	1.14863	-11.4936		4.95358						-4.92772	-0.216819	3.46777		4.53619
10.7916	1.22597	-11.377		1.85319						21.0163	-0.218757	3.37717		-1.2203
13.6299	1.20966	-10.5689		5.91863						-4.96898	-0.219678	3.46436		4.55594
5.78146	1.14555	-10.5711		-3.94813						3.0747	-0.214566	3.35654		2.69682
8.60686	1.17092	-12.3108		-2.23291						-0.85287	-0.223209	3.41774		3.60811
10.9537	1.18693	-12.4146		0.586661						-0.895106	-0.22019	3.36129		3.55838
9.9287	1.14016	-11.4465		-0.126168						2.73586	-0.215162	3.41608		2.82743
12.8202	1.16246	-10.4775		4.42538						0.445778	-0.210837	3.51463		3.42064
-0.723988	1.16471	-11.8804		-12.7236						8.94551	-0.216843	3.36605		1.42628
7.5311	1.16229	-12.1121		-3.35874						-3.00242	-0.217543	3.38993		4.04309
8.11708	1.18971	-11.8204		-2.16342						1.22571	-0.22124	3.48252		3.21135
12.3352	1.24884	-9.92897		5.47581						1.11012	-0.208112	3.44712		3.21609
8.38897	1.16358	-11.585		-1.82368						-2.41919	-0.216753	3.46719		3.99156
11.7532	1.22784	-12.1552		2.27582						0.975198	-0.206723	3.49247		3.29088
2.00004	1.22856	-11.4766		-9.01946						-10.2001	-0.221837	3.45401		5.71678
9.83177	1.15587	-11.8264		-0.462196						-5.58434	-0.217739	3.3736		4.58953
0.233158	1.19097	-12.3884		-12.1107						-0.742781	-0.216805	3.38828		3.54931
-0.401253	1.20589	-12.0495		-12.5333						0.842416	-0.205569	3.39118		3.21801
9.54905	1.20363	-11.8703		-0.376802						-8.52714	-0.221311	3.37376		5.26091
0.0961784	1.14358	-11.1073		-10.9973						-0.796205	-0.220236	3.38044		3.5558
6.7053	1.17348	-11.9153		-4.04675						4.84155	-0.216829	3.44314		2.39336
17.2892	1.18623	-11.7455		8.76346						-5.4612	-0.21945	3.35907		4.55753
12.6712	1.22858	-11.7842		3.78348						-4.91729	-0.225465	3.3895		4.49817
11.1603	1.20718	-10.1466		3.32595						6.95978	-0.222468	3.42573		1.8774
4.69599	1.20855	-11.9947		-6.31932						-3.56955	-0.221135	3.38343		4.17278
-0.633103	1.19865	-11.2809		-12.0398						5.92008	-0.218997	3.42543		2.12895
5.32524	1.23724	-11.3218		-4.7332						-3.21671	-0.22264	3.31697		4.03314
5.44085	1.25105	-11.2339		-4.42719						-2.24507	-0.226284	3.44227		3.95029
13.8549	1.23867	-11.6683		5.49348						-0.74937	-0.208474	3.43649		3.59272
4.67874	1.20952	-10.7339		-5.07487						3.87334	-0.226944	3.42207		2.54304
6.77404	1.19452	-12.2801		-4.18842						-6.02785	-0.221643	3.36336		4.69939
7.48076	1.21727	-10.5097		-1.40355						-3.33326	-0.218371	3.50037		4.22826
14.6807	1.15211	-11.2064		5.70736						3.76274	-0.224031	3.48168		2.6387
6.09526	1.24157	-11.4171		-3.84942						-7.07027	-0.214322	3.41859		4.93391
10.637	1.20395	-11.9958		0.810608						-10.059	-0.225065	3.41378		5.67771
8.66514	1.15475	-11.4008		-1.39476						-3.57597	-0.220953	3.37073		4.16085
11.8584	1.21396	-12.3768		2.01875						3.34728	-0.206627	3.42019		2.72856
2.92363	1.27372	-13.7857		-10.0618						-4.95573	-0.226866	3.37131		4.4956
8.60988	1.17802	-11.1743		-1.03174						-7.68005	-0.222772	3.44883		5.15972
11.4671	1.16419	-11.3597		1.9902						0.872045	-0.213452	3.43428		3.24814
12.1211	1.17982	-9.4864		4.81431						5.97001	-0.21533	3.43263		2.14711
7.3671	1.25131	-11.0811		-1.86264						1.49346	-0.217895	3.39241		3.06699
3.50547	1.18545	-11.4176		-7.26206						6.41142	-0.212993	3.46336		2.09777
8.60741	1.18938	-11.1605		-0.922985						-4.09487	-0.213689	3.30719		4.18222
13.2995	1.22583	-10.7018		5.60112						6.21955	-0.219831	3.44805		2.0808
13.6475	1.26041	-11.4289		5.7726						-7.01941	-0.209515	3.43946		4.91014
11.2793	1.14552	-12.736		0.184693						0.792704	-0.206853	3.48961		3.32563
9.45605	1.17443	-10.5729		0.532497						-6.61356	-0.212978	3.34935		4.75789
10.688	1.19712	-12.4327		0.362145						1.19643	-0.216211	3.47246		3.21378
11.292	1.15415	-12.0489		0.983849						-0.243497	-0.226097	3.38261		3.43766
14.328	1.21886	-11.8635		5.6003						-0.269529	-0.219637	3.33283		3.39203
3.06564	1.15425	-11.8692		-8.33066						1.90829	-0.217291	3.43294		3.01828
7.87437	1.18947	-11.9589		-2.59261						-0.0107919	-0.2136	3.39738		3.39968
11.7034	1.21711	-10.892		3.35229						-0.983979	-0.221821	3.39378		3.61205
18.6217	1.13844	-11.0519		10.1479						-2.15252	-0.21063	3.42928		3.88266
5.05497	1.15196	-11.284		-5.46089						-8.50734	-0.225967	3.36408		5.28645
11.0425	1.17124	-11.7729		1.16052						6.27885	-0.216621	3.45117		2.09103
10.253	1.18456	-12.2196		-0.074336						3.83228	-0.224108	3.41876		2.55992
15.7087	1.24123	-10.2748		9.2232						-3.02782	-0.218116	3.37774		4.03816
12.7727	1.16709	-12.1367		2.77013						-0.53932	-0.215639	3.40197		3.51827
6.05183	1.21288	-12.0005		-4.66035						4.34082	-0.216807	3.4774		2.53628
8.91626	1.19411	-10.9765		-0.329453						2.66833	-0.22215	3.38435		2.79158
10.2659	1.20629	-10.4818		1.90196						8.47866	-0.21314	3.44257		1.63543
7.25337	1.2525	-12.3547		-3.26989						-5.44291	-0.220142	3.43783		4.63604
5.15	1.29406	-11.2572		-4.59283						0.0823813	-0.213757	3.45121		3.4336
1.66905	1.20777	-11.242		-9.22622						-2.2413	-0.214407	3.46845		3.949
19.3385	1.20001	-12.4034		10.8031						-1.08019	-0.215007	3.36818		3.60042
2.61066	1.21949	-11.9131		-8.72944						2.63515	-0.208721	3.48651		2.9365
15.2658	1.23437	-10.4109		8.43278						3.7056	-0.220038	3.47849		2.66311
8.65147	1.17464	-12.6383		-2.47599						-4.31649	-0.223127	3.44747		4.41059
8.02064	1.21049	-11.9915		-2.2826						-2.81853	-0.218271	3.37609		3.9913
10.8382	1.20114	-10.2931		2.72505						-8.59597	-0.218482	3.46351		5.34158
7.42836	1.18399	-10.9182		-2.12309						-7.96296	-0.216461	3.42282		5.14649
-0.0396771	1.19308	-11.61		-11.6574						5.21633	-0.22016	3.33432		2.1859
9.80176	1.1331	-12.3427		-1.23634						-5.23218	-0.212355	3.46249		4.57357
15.5739	1.14871	-11.3676		6.52217						-6.19354	-0.214016	3.39185		4.71737
6.95826	1.15821	-10.7036		-2.64453						7.06604	-0.22033	3.37743		1.82057
14.5062	1.22653	-11.9175		5.87478						-1.15147	-0.221498	3.29682		3.55187
7.56074	1.18483	-11.3018		-2.34361						5.77635	-0.21575	3.45539		2.20914
16.0424	1.16388	-11.4948		7.17655						3.8658	-0.215286	3.52151		2.68926
6.88194	1.20049	-13.9001		-5.63843						0.019954	-0.218858	3.4249		3.42054
7.20549	1.14569	-12.5099		-4.25469						7.79779	-0.220698	3.33129		1.61033
7.35126	1.25369	-10.9407		-1.7245						5.39685	-0.216011	3.36538		2.1996
-0.552994	1.18342	-11.4494		-12.1038						-0.597602	-0.231435	3.35282		3.49112
7.71076	1.20295	-10.263		-0.987364						-2.84341	-0.216883	3.40973		4.02642
8.13892	1.1742	-11.3772		-1.82053						-1.81426	-0.228042	3.45943		3.87315
7.83526	1.19618	-11.2758		-1.90341						2.38708	-0.208771	3.4038		2.90545
15.4064	1.20647	-11.5061		7.0812						1.4522	-0.223113	3.43925		3.11525
0.847467	1.11537	-11.5328		-10.5875						0.431894	-0.21487	3.48978		3.39698
7.73995	1.18265	-10.6642		-1.51055						7.80013	-0.214869	3.455		1.77899
11.9333	1.21789	-10.2376		4.29582						4.05945	-0.212428	3.42063		2.55829
10.5081	1.17484	-13.2167		-0.871461						-1.32119	-0.210153	3.47569		3.75334
6.35045	1.18309	-10.5811		-3.06795						2.20332	-0.215223	3.36106		2.88685
11.106	1.15967	-12.7179		0.16134						9.94519	-0.219939	3.44839		1.26105
16.7298	1.23097	-9.83939		10.7544						-7.53685	-0.222367	3.42437		5.10031
14.7452	1.14136	-10.6344		6.19509						2.15139	-0.223215	3.44032		2.96009
13.453	1.18534	-12.0426		3.90385						3.57968	-0.215929	3.38885		2.61589
15.8603	1.14401	-12.0632		6.08116						4.86887	-0.211372	3.3922		2.36306
7.74079	1.1995	-11.6365		-2.35146						1.73292	-0.214111	3.34846		2.97742
11.4048	1.17413	-11.4987		1.89192						-4.55312	-0.212861	3.37662		4.3458
9.64452	1.25589	-11.8555		0.256924						-1.24223	-0.223056	3.45324		3.73032
8.93119	1.21446	-12.3722		-1.5256						-7.05173	-0.22563	3.47836		5.06944
7.09089	1.2335	-10.8267		-2.08012						2.22564	-0.209224	3.36533		2.89968
11.7737	1.20136	-10.3593		3.78515						0.703852	-0.220406	3.43589		3.28076
1.76265	1.2585	-11.6719		-9.45357						-5.87997	-0.224449	3.43242		4.75217
4.99893	1.13893	-11.3131		-5.61967						-6.76602	-0.210166	3.44948		4.87147
6.63687	1.12946	-11.2745		-3.77841						-2.11425	-0.215105	3.43787		3.89265
13.3809	1.20446	-10.7109		5.40589						2.22674	-0.228669	3.42354		2.91435
10.1691	1.2136	-10.3166		2.02461						-2.60558	-0.214639	3.36506		3.92431
10.3795	1.23248	-11.5688		1.22363						-1.55064	-0.212548	3.38122		3.7108
14.8375	1.23543	-11.4853		6.84535						-9.45184	-0.221433	3.41617		5.50912
11.2016	1.17462	-10.2946		2.86295						0.832598	-0.214391	3.41111		3.23261
12.8974	1.24688	-11.5336		4.54785						-0.301616	-0.221555	3.45048		3.5173
10.9611	1.21405	-9.77858		3.52875						-8.37043	-0.22452	3.40639		5.28572
19.5294	1.21442	-10.4638		13.2532						-1.48303	-0.213198	3.37813		3.69431
7.02327	1.21112	-12.843		-4.33704						-1.03785	-0.223533	3.38417		3.61617
3.46369	1.19021	-11.0502		-6.92768						-6.42605	-0.214586	3.38456		4.7635
7.57266	1.18993	-11.1087		-2.09782						-6.07025	-0.216951	3.47752		4.79447
16.8253	1.17404	-11.2981		8.45551						1.53923	-0.217496	3.49749		3.16272
15.8125	1.15989	-12.0052		6.33557						-6.92824	-0.216563	3.33806		4.83846
11.7312	1.21027	-10.9074		3.2905						-3.20316	-0.220388	3.47783		4.18376
9.08675	1.2425	-12.5495		-1.25918						-0.233043	-0.210665	3.48548		3.53457
18.4122	1.21541	-13.1482		9.23011						-7.54037	-0.218868	3.38698		5.03733
15.1223	1.14182	-12.8909		4.37594						-0.772476	-0.21549	3.4797		3.64616
9.49669	1.21336	-11.6533		-0.130461						-6.422	-0.220417	3.43983		4.85534
2.37764	1.20261	-11.9736		-9.11426						-0.40344	-0.223476	3.41079		3.50095
18.5084	1.2123	-11.4459		10.9918						-5.70739	-0.219787	3.37973		4.63413
12.0182	1.25092	-11.6069		3.42683						11.3266	-0.213809	3.32969		0.90795
2.30251	1.20691	-11.8541		-9.0752						-13.2128	-0.214339	3.39065		6.22267
2.31062	1.21281	-10.9683		-8.16595						5.51175	-0.218839	3.36948		2.1633
13.805	1.18146	-12.5101		3.80002						-0.430429	-0.220141	3.41505		3.50981
7.03455	1.2191	-10.511		-1.93514						1.06092	-0.214899	3.47323		3.24524
8.92868	1.17131	-11.1334		-0.675154						0.739353	-0.213443	3.45122		3.29341
7.5315	1.23537	-10.9336		-1.62946						-1.90817	-0.219117	3.37206		3.79017
4.9726	1.25283	-11.3022		-5.07239						4.88906	-0.216512	3.41067		2.35213
8.3003	1.22054	-12.3136		-2.18279						-5.03353	-0.21556	3.45359		4.53862
0.423806	1.20267	-11.2311		-10.7214						5.17958	-0.223284	3.37791		2.2214
7.06995	1.21682	-12.2628		-3.66001						-5.32689	-0.217584	3.48488		4.64393
5.89254	1.19683	-11.7484		-4.696						1.41481	-0.225055	3.4939		3.17549
9.00396	1.15315	-11.9192		-1.53632						-0.943681	-0.208528	3.38418		3.58097
10.1569	1.18976	-12.4703		-0.386115						-0.150647	-0.221269	3.34622		3.37956
3.87269	1.18164	-12.6058		-8.02963						1.11209	-0.215189	3.42631		3.187
6.64738	1.15182	-12.1336		-4.47707						-1.47416	-0.220655	3.45478		3.78006
4.33502	1.20048	-11.4754		-6.27129						4.62113	-0.220479	3.47555		2.45669
9.59149	1.18174	-11.4663		-0.131681						-4.91193	-0.224307	3.40232		4.5041
20.3849	1.2295	-11.6312		13.4321						-7.09301	-0.206658	3.45078		4.91661
10.7454	1.28141	-11.2774		2.492						-7.30227	-0.222654	3.45814		5.08402
7.71387	1.24201	-11.9452		-2.36441						4.40812	-0.219485	3.39697		2.42946
13.3218	1.18537	-10.7053		5.08592						-8.71994	-0.212244	3.47299		5.32374
-0.111286	1.26743	-10.1281		-10.2691						-1.7734	-0.217355	3.41819		3.80365
15.8869	1.23097	-10.7449		8.81143						-5.99291	-0.222898	3.40208		4.73789
12.192	1.25367	-11.4237		3.8611						-7.61253	-0.218536	3.39603		5.05964
11.4485	1.13231	-10.6947		2.26853						-3.42357	-0.211587	3.37797		4.10236
11.8277	1.24839	-11.5743		3.1913						-3.98097	-0.225306	3.46228		4.35922
13.1822	1.23073	-10.6866		5.53708						2.36781	-0.216465	3.46165		2.9491
18.6092	1.17469	-12.1031		9.75701						-4.14952	-0.221536	3.44497		4.36424
7.14871	1.23823	-10.487		-1.63528						-3.94473	-0.208641	3.43829		4.26132
6.95382	1.21665	-11.4366		-2.97621						0.0566275	-0.212846	3.46952		3.45747
15.2786	1.24828	-13.4186		5.65346						0.610464	-0.216135	3.3717		3.23975
8.4091	1.18011	-11.0258		-1.10211						5.20475	-0.204243	3.44009		2.37706
16.4263	1.20018	-12.3518		7.36278						-7.95918	-0.217894	3.39535		5.12961
9.19136	1.212	-12.1682		-1.02823						10.7269	-0.219018	3.44881		1.09941
7.64204	1.18509	-12.4416		-3.38507						2.34816	-0.21514	3.4051		2.89992
4.45207	1.16107	-12.7516		-7.5824						-8.12199	-0.219325	3.42775		5.20911
12.972	1.17464	-10.2603		4.9771						5.83528	-0.21775	3.45142		2.18079
3.73519	1.257	-12.674		-7.97883						-2.49661	-0.215691	3.4574		3.9959
2.71237	1.25383	-11.2855		-7.88464						-3.31776	-0.2209	3.45729		4.19019
7.12749	1.20292	-12.9063		-4.33252						-7.71745	-0.210812	3.41634		5.04327
8.87946	1.25278	-12.7527		-1.62869						7.37743	-0.219332	3.4429		1.82479
10.4668	1.20455	-11.345		1.26288						-3.15711	-0.214291	3.44737		4.12391
13.3229	1.25039	-12.0894		4.56939						7.29635	-0.22288	3.43218		1.80597
9.72009	1.16994	-11.5693		-0.197377						4.30047	-0.214588	3.46566		2.54283
10.7478	1.20378	-11.6032		1.33486						-7.7559	-0.214607	3.41834		5.08281
-0.511691	1.13341	-11.2528		-11.8327						-3.87686	-0.223393	3.36649		4.23255
9.71563	1.20664	-11.5522		0.171039						-1.6165	-0.221423	3.46616		3.82409
13.678	1.17914	-11.9226		4.20566						-6.77469	-0.212601	3.34492		4.78523
7.31101	1.18752	-11.9484		-3.26643						-0.58735	-0.220143	3.42823		3.55753
7.40061	1.13348	-11.7334		-3.34499						3.41994	-0.222663	3.40523		2.64373
6.86227	1.19476	-12.8639		-4.6651						-10.4108	-0.20714	3.36996		5.52645
7.64978	1.18713	-12.5776		-3.49627						0.276878	-0.212318	3.4467		3.38792
14.7324	1.20087	-11.41		6.28175						-3.73818	-0.214879	3.42492		4.22818
9.82678	1.24195	-11.1726		1.03176						-4.52567	-0.227884	3.43168		4.46301
8.93145	1.26972	-13.2347		-1.89424						-0.975961	-0.230328	3.44305		3.66784
12.5421	1.16935	-12.3622		2.30385						-16.5085	-0.212424	3.39496		6.90175
14.8767	1.18097	-13.2144		4.35457						-9.0829	-0.216764	3.35809		5.32693
16.717	1.23815	-11.7541		8.94395						5.76642	-0.222426	3.42877		2.14617
13.3616	1.18905	-10.3541		5.53349						-9.83442	-0.220916	3.47668		5.64927
13.8842	1.20417	-10.5579		6.16102						4.71031	-0.206056	3.43728		2.46669
-1.06143	1.29724	-12.4318		-13.8087						-2.1567	-0.220889	3.42454		3.90093
7.09606	1.17069	-11.9264		-3.61911						3.1161	-0.218166	3.41939		2.73956
15.2451	1.17897	-11.7196		6.25402						1.43476	-0.213515	3.42819		3.12185
13.1783	1.28016	-11.8855		4.98479						-0.465098	-0.210632	3.40412		3.50208
2.20826	1.22022	-11.4115		-8.71692						3.88496	-0.221769	3.44654		2.58498
9.66119	1.19996	-11.6466		-0.0536246						-8.41846	-0.227339	3.36759		5.28144
13.3811	1.1867	-11.2449		4.63443						9.30909	-0.217376	3.39824		1.37466
7.66457	1.17315	-11.0926		-2.10085						1.31478	-0.209836	3.39428		3.11839
16.1287	1.20498	-11.6832		7.75151						-0.583761	-0.226074	3.39264		3.52462
12.2339	1.1828	-11.5835		2.88685						0.607875	-0.214176	3.44721		3.31702
4.86012	1.21313	-11.3759		-5.47997						8.07324	-0.217797	3.44809		1.68977
9.90689	1.14918	-10.7254		0.659447						-5.26299	-0.215687	3.48745		4.6226
9.30914	1.21183	-10.4415		0.839647						-1.01528	-0.208134	3.44092		3.65223
9.64167	1.19886	-10.9001		0.658863						-0.828673	-0.203292	3.35105		3.51951
11.1785	1.20907	-11.4473		2.06825						6.44663	-0.211081	3.36389		2.00313
9.98053	1.23313	-12.4657		-0.15845						-7.39811	-0.21033	3.4686		5.02464
13.5236	1.20964	-12.9632		3.39549						2.38854	-0.222828	3.43267		2.90044
6.16353	1.23201	-11.0836		-3.49002						-5.64419	-0.218567	3.39184		4.62548
11.9341	1.19666	-10.5324		3.74857						-9.63874	-0.218108	3.44551		5.54779
7.38715	1.26706	-12.4502		-3.09031						-12.6488	-0.211198	3.37198		6.04338
12.4899	1.22963	-11.9987		3.35936						2.58043	-0.220438	3.43782		2.869
9.32353	1.22955	-11.9302		-0.466388						6.21284	-0.219244	3.49156		2.12943
7.2126	1.20244	-10.1853		-1.5126						3.63709	-0.217865	3.45845		2.66606
12.1483	1.12798	-11.519		2.18396						4.27808	-0.208973	3.45046		2.55645
-0.467402	1.15167	-10.6684		-11.2067						3.74811	-0.217894	3.36369		2.547
8.96645	1.21974	-11.1475		-0.210746						9.31176	-0.222227	3.40451		1.33518
11.1732	1.1869	-12.6517		0.60977						6.16921	-0.219647	3.45654		2.1015
7.38552	1.21517	-11.6048		-2.63013						4.40468	-0.217979	3.42172		2.46159
8.81716	1.24856	-11.5885		-0.579787						1.63434	-0.214308	3.45646		3.10621
-1.69891	1.23991	-11.5968		-13.7033						12.7375	-0.215777	3.37792		0.629465
5.02342	1.24153	-10.4421		-4.20536						1.64503	-0.22095	3.32999		2.96652
15.9035	1.16218	-11.4825		7.00032						8.41657	-0.217143	3.47549		1.64789
4.00041	1.2333	-12.5771		-7.64345						-3.58026	-0.222128	3.39745		4.19273
2.81687	1.20904	-10.2879		-6.88218						13.587	-0.214874	3.42595		0.506448
7.55874	1.17644	-12.9236		-4.03124						-0.16687	-0.216151	3.37053		3.4066
9.1994	1.21739	-11.8972		-0.697941						-3.30323	-0.215316	3.5067		4.21793
0.34157	1.12836	-10.7234		-10.338						-6.65485	-0.209363	3.39189		4.78517
13.8558	1.11624	-12.8443		2.62212						-3.5212	-0.214334	3.42972		4.18443
8.30166	1.16825	-11.6167		-1.91828						0.714271	-0.220334	3.39568		3.2383
12.568	1.21316	-11.4474		3.79964						4.39107	-0.214811	3.51356		2.57031
7.18276	1.20962	-11.2084		-2.51998						3.70944	-0.218357	3.35973		2.54975
16.1488	1.12692	-11.8437		6.35475						-8.25818	-0.212336	3.38938		5.14288
4.18915	1.163	-11.147		-6.27503						-4.72734	-0.213269	3.35994		4.36813
5.38256	1.22139	-11.4289		-4.85471						-12.281	-0.215282	3.46954		6.11342
12.4123	1.16831	-9.34639		5.15497						2.04765	-0.21884	3.4162		2.96809
9.63221	1.18643	-11.7421		-0.314102						-3.61615	-0.222936	3.38282		4.18899
13.946	1.15998	-11.2258		4.95127						-4.4673	-0.21415	3.34008		4.29675
1.88815	1.19399	-11.4261		-9.1717						7.89727	-0.214688	3.3869		1.69146
7.65987	1.21214	-11.0507		-1.76584						-6.07326	-0.210391	3.46607		4.74383
7.13515	1.2123	-11.2909		-2.64094						4.51099	-0.215627	3.41352		2.44083
4.71945	1.23388	-11.6921		-5.86883						-1.19451	-0.221269	3.40768		3.67199
5.94001	1.25069	-11.6882		-4.25914						1.48529	-0.213652	3.43289		3.11556
7.2813	1.2269	-12.9694		-4.03593						0.725724	-0.209211	3.40663		3.2548
11.5364	1.21633	-10.5547		3.47726						-2.18272	-0.218778	3.47306		3.95059
10.3409	1.14424	-12.3198		-0.487327						2.73778	-0.226284	3.45851		2.83899
7.44035	1.20901	-11.6713		-2.67581						-10.3309	-0.211827	3.39839		5.58675
14.7716	1.16838	-11.6151		5.64375						-3.2714	-0.209738	3.45304		4.13918
19.7397	1.19216	-11.584		11.9489						-0.344503	-0.221724	3.4605		3.53688
8.61777	1.26112	-10.8275		0.0405668						-5.1311	-0.21643	3.43423		4.54475
7.96591	1.16746	-11.222		-1.92207						-3.43812	-0.21958	3.42189		4.17683
8.50665	1.24312	-11.4703		-0.89552						-4.99183	-0.213212	3.39224		4.45655
3.30463	1.14556	-12.4447		-8.65905						-10.83	-0.216087	3.36748		5.70771
16.0101	1.13444	-12.5159		5.64662						-5.65972	-0.214608	3.38991		4.60453
11.5525	1.15537	-11.6855		1.66198						9.21334	-0.219026	3.45829		1.44033
5.55681	1.19769	-11.8766		-5.22125						3.73386	-0.222429	3.46462		2.6341
5.53032	1.17595	-11.5958		-5.09238						-1.62416	-0.221058	3.40488		3.76391
15.9702	1.24712	-13.3811		6.53568						6.34277	-0.218626	3.48262		2.09593
10.6457	1.18655	-12.9368		-0.305209						2.87227	-0.222393	3.37745		2.73867
5.59091	1.22068	-12.4792		-5.65449						12.1881	-0.212804	3.38466		0.790987
6.9535	1.1825	-12.1918		-3.96927						6.63608	-0.213966	3.52188		2.10199
7.84	1.17745	-12.8521		-3.62087						5.12371	-0.213569	3.44203		2.34777
1.44181	1.16705	-12.9014		-11.2187						-5.68834	-0.219392	3.43144		4.67941
1.35232	1.17768	-12.354		-10.7614						-10.7724	-0.223219	3.4881		5.8927
4.41922	1.21424	-11.9381		-6.57205						8.62231	-0.211028	3.34883		1.52928
6.38073	1.29589	-11.1832		-2.91456						3.0528	-0.217324	3.35105		2.6876
15.0016	1.16146	-12.3427		5.08106						-0.963008	-0.22083	3.48085		3.69351
6.74401	1.21654	-10.8805		-2.67616						5.55246	-0.213403	3.37846		2.19355
9.31936	1.22401	-11.0121		0.394873						-4.5854	-0.21721	3.36767		4.36366
3.2884	1.2094	-12.1336		-8.15659						-6.98282	-0.220679	3.4892		5.03016
3.27619	1.24434	-11.5361		-7.45939						-7.18135	-0.221814	3.42561		5.01854
6.9685	1.24063	-10.7654		-2.12004						-3.13052	-0.213345	3.45338		4.12126
6.8979	1.2349	-12.2797		-3.76154						4.6605	-0.217778	3.44833		2.43337
18.7747	1.15805	-11.9168		9.82525						11.2235	-0.218086	3.4954		1.04771
14.4678	1.22198	-11.0786		6.60071						0.0991229	-0.214273	3.43046		3.40922
8.87902	1.2318	-13.4214		-2.4843						-1.77584	-0.213565	3.39536		3.77462
14.9339	1.24215	-11.5396		7.0106						8.28831	-0.206904	3.36196		1.64707
7.7765	1.16733	-11.3721		-2.29437						-10.2175	-0.218656	3.44773		5.68186
10.7372	1.22425	-12.1434		1.00157						-5.78687	-0.213591	3.42926		4.66528
10.9161	1.19093	-11.4101		1.5903						-3.65013	-0.220012	3.4458		4.24887
12.6043	1.17366	-11.8791		2.91412						-1.34566	-0.215386	3.35736		3.64719
-0.256437	1.16329	-12.6669		-12.9652						-2.89651	-0.207053	3.41591		4.01564
10.2256	1.19486	-11.8831		0.335083						-13.6438	-0.219832	3.42533		6.42466
9.20811	1.19496	-11.9308		-0.927459						-4.12433	-0.214342	3.39782		4.28184
3.38701	1.18005	-12.2169		-8.22005						-0.282499	-0.224342	3.44896		3.51233
4.75375	1.23073	-12.1995		-6.34892						-1.99129	-0.220912	3.37143		3.81133
13.0224	1.19898	-12.1038		3.50987						-0.216507	-0.223121	3.42121		3.46952
15.3021	1.19916	-12.5183		5.83128						5.77901	-0.217497	3.4628		2.20588
5.28781	1.22845	-12.5824		-6.08656						-0.877111	-0.215446	3.48007		3.66904
21.1577	1.19904	-11.0685		14.3004						-2.02203	-0.219792	3.4027		3.84713
10.5856	1.20032	-12.8634		-0.157317						-1.628	-0.216469	3.38385		3.73627
10.0586	1.20409	-11.7857		0.325678						1.6605	-0.22498	3.35725		2.98367
5.23725	1.24919	-12.7878		-6.2455						1.40441	-0.221651	3.46115		3.14986
10.6073	1.20922	-10.93		1.89656						0.221475	-0.209887	3.35748		3.31099
8.39969	1.22592	-10.6166		-0.319247						-2.45254	-0.216988	3.47065		4.00282
12.2481	1.15928	-12.2962		1.90279						0.374223	-0.221188	3.33882		3.25605
10.9715	1.22961	-12.3204		1.17037						8.94932	-0.21781	3.46471		1.51545
2.60621	1.18854	-11.8249		-8.72728						1.62335	-0.22286	3.38647		3.02469
0.86116	1.22833	-10.2412		-9.18338						10.2677	-0.212641	3.43773		1.25439
13.1002	1.24827	-11.812		4.54055						0.656349	-0.219933	3.36038		3.21602
0.211217	1.19309	-11.5555		-11.3035						-9.36808	-0.2201	3.415		5.47692
8.37831	1.18336	-11.1302		-1.21566						1.27907	-0.210481	3.39522		3.126
6.32205	1.21679	-10.9819		-3.28925						7.03857	-0.216332	3.43376		1.91109
10.6701	1.21337	-11.3121		1.63455						10.1188	-0.219684	3.4968		1.27385
7.22685	1.16668	-11.8051		-3.37375						1.81202	-0.210181	3.43235		3.0515
13.5271	1.17388	-10.4391		5.44019						0.428763	-0.220343	3.36444		3.26997
13.8375	1.22602	-12.4395		4.52554						-10.0456	-0.215106	3.43495		5.59583
6.813	1.18691	-11.8612		-3.7748						-0.352225	-0.22	3.41821		3.4957
9.01371	1.22652	-11.305		-0.249489						11.0332	-0.217142	3.40119		1.00541
9.75538	1.23686	-10.7728		1.29319						6.80266	-0.22135	3.47282		1.96705
8.95802	1.20515	-12.356		-1.5602						7.07697	-0.216674	3.43861		1.90521
11.3363	1.15996	-11.9484		1.2013						-2.9176	-0.209699	3.45173		4.06355
6.58635	1.22054	-12.0359		-3.99703						8.97543	-0.213585	3.38492		1.4679
6.68495	1.19624	-11.8974		-3.9006						-10.7823	-0.220309	3.43444		5.80987
11.2959	1.16646	-11.9024		1.27382						7.97412	-0.204762	3.43665		1.80386
13.3474	1.20902	-10.6172		5.52003						3.69308	-0.22009	3.50296		2.69015
8.32596	1.18514	-11.3269		-1.45946						2.04715	-0.215888	3.42909		2.98714
8.54547	1.19407	-12.4108		-2.20684						-1.40897	-0.219768	3.44409		3.75374
15.8426	1.15201	-11.5848		6.66599						-13.4603	-0.214597	3.33323		6.22177
15.7936	1.18448	-11.1491		7.55818						-7.44348	-0.208492	3.38887		4.94078
4.71381	1.19148	-9.94336		-4.32694						-9.57452	-0.219258	3.36344		5.46274
10.2765	1.18251	-11.575		0.57707						2.19991	-0.215445	3.391		2.91704
11.4639	1.26639	-11.96		2.55775						-1.22019	-0.216112	3.39215		3.65584
4.42855	1.20183	-10.4333		-5.11091						-1.77333	-0.217273	3.33583		3.72113
14.2806	1.2514	-11.6005		6.27029						-0.763579	-0.226413	3.31289		3.48577
11.119	1.20889	-11.0017		2.43994						-10.3749	-0.215747	3.40769		5.64604
5.32031	1.17201	-10.8426		-4.60717						3.045	-0.213453	3.51478		2.86481
7.27819	1.24167	-10.8384		-1.80127						-0.615456	-0.214023	3.4291		3.56082
6.32857	1.22204	-11.5029		-3.7691						-0.0850843	-0.219209	3.38764		3.40629
11.2726	1.19363	-10.3628		3.09246						-7.99533	-0.219549	3.38782		5.14319
4.17913	1.21068	-12.0161		-6.9565						5.7142	-0.21682	3.33263		2.09368
12.4962	1.24777	-11.1045		4.48802						-6.78145	-0.221719	3.4131		4.91668
8.61835	1.24494	-11.299		-0.56968						-2.81849	-0.21569	3.42936		4.03728
11.7672	1.24823	-11.0214		3.66681						3.25152	-0.212303	3.32016		2.62986
6.80072	1.14106	-11.477		-3.71692						5.09329	-0.225418	3.32708		2.17896
12.466	1.26192	-11.5832		4.14792						-18.5309	-0.218699	3.43837		7.49106
4.48487	1.18545	-11.2906		-5.974						-1.17612	-0.217457	3.42772		3.68348
9.97181	1.15039	-12.0244		-0.552925						-0.798514	-0.214682	3.3967		3.56813
7.1797	1.21049	-11.4739		-2.78298						11.1711	-0.211869	3.42039		1.05358
9.95923	1.21341	-10.2673		1.81738						3.55233	-0.204033	3.44928		2.72449
11.0186	1.147	-11.0594		1.57896						-5.16614	-0.212889	3.3951		4.49492
8.7343	1.09922	-13.2188		-3.61786						1.40637	-0.224177	3.47865		3.16337
-1.31161	1.15582	-11.612		-13.128						2.32978	-0.21979	3.38827		2.8762
15.2696	1.24793	-12.244		6.81139						-6.79335	-0.206169	3.45577		4.85635
10.9039	1.19612	-12.4255		0.61693						0.154244	-0.212955	3.47477		3.44192
11.7504	1.22642	-10.5115		3.89942						-6.00323	-0.214282	3.41506		4.70145
7.08378	1.13104	-12.2413		-4.2293						2.1905	-0.220138	3.41147		2.92926
17.1778	1.17057	-12.2937		7.81413						1.06874	-0.220906	3.44765		3.21156
5.47437	1.19569	-11.8435		-5.29779						0.450129	-0.22218	3.36667		3.26666
4.61897	1.24868	-10.7398		-4.97223						1.06389	-0.228869	3.43082		3.18733
14.5957	1.20192	-12.4423		5.1006						4.70619	-0.215788	3.48526		2.46973
13.4487	1.18466	-11.792		4.14008						4.45618	-0.227733	3.4075		2.39268
2.87709	1.23244	-11.3553		-7.8095						-4.55872	-0.218169	3.48895		4.48352
0.724566	1.11402	-11.4014		-10.5942						-8.96912	-0.224449	3.46714		5.48025
9.11106	1.16359	-12.1231		-1.52163						-3.19489	-0.218914	3.4256		4.125
14.6269	1.18303	-11.4365		5.86761						11.5514	-0.210734	3.37698		0.942704
13.6111	1.21132	-12.6962		3.79113						3.03713	-0.217115	3.41713		2.75772
9.16942	1.13072	-12.2879		-1.91987						-0.919231	-0.221808	3.37593		3.57982
5.83215	1.2623	-11.0393		-3.67739						0.92017	-0.219633	3.44562		3.24352
6.65411	1.21727	-12.8406		-4.74069						8.40307	-0.218944	3.42636		1.58655
1.10317	1.23338	-11.0282		-9.66756						9.17676	-0.21253	3.47648		1.52614
13.4868	1.23093	-12.0075		4.59371						0.250916	-0.213514	3.34397		3.29039
7.31473	1.21587	-12.2912		-3.39739						1.65317	-0.22167	3.44893		3.08248
11.5501	1.1345	-13.1341		-0.0304528						-2.93376	-0.217108	3.40458		4.04152
4.77905	1.21877	-11.5983		-5.77372						4.39578	-0.218488	3.40288		2.44245
10.7035	1.16519	-11.407		1.06469						7.51318	-0.210764	3.42769		1.84418
13.0192	1.22786	-11.5667		4.41908						-1.10219	-0.212731	3.43599		3.67046
9.76352	1.17385	-12.6455		-1.1846						-8.11249	-0.223184	3.42127		5.23184
14.4835	1.18019	-11.7362		5.35716						-3.06719	-0.214054	3.39213		4.04868
6.45159	1.19974	-11.7177		-3.97746						0.0522684	-0.218987	3.40482		3.39338
10.0336	1.18065	-13.1878		-1.3417						-1.42193	-0.21652	3.4244		3.73228
9.49812	1.18002	-10.6774		0.530517						1.61332	-0.22639	3.46025		3.09501
14.2701	1.16751	-11.9514		4.70898						-1.74897	-0.213857	3.4236		3.79763
6.58498	1.16722	-11.9829		-4.29678						7.20682	-0.211103	3.44846		1.92708
3.43134	1.16881	-10.8393		-6.82874						0.170064	-0.210828	3.37508		3.33922
16.1808	1.19405	-11.3301		7.99065						-6.18881	-0.212371	3.43112		4.74545
9.90823	1.19018	-11.3902		0.402452						0.258916	-0.214847	3.4485		3.39287
8.72698	1.22321	-13.4749		-2.80002						3.04323	-0.218941	3.38401		2.71772
8.19222	1.25425	-10.9104		-0.635301						0.176527	-0.222238	3.41128		3.37205
18.2994	1.19699	-12.7627		9.14154						4.46262	-0.214941	3.46962		2.51042
9.44249	1.24299	-11.4155		0.321362						-2.73578	-0.220754	3.33925		3.94318
6.50804	1.22343	-11.3608		-3.39871						-6.61226	-0.224535	3.3776		4.86228
9.31388	1.20961	-11.4793		-0.213146						-3.69942	-0.216355	3.47943		4.27982
11.3517	1.18891	-12.7434		0.752667						-7.76255	-0.217679	3.41888		5.10862
2.64132	1.1765	-11.2466		-8.13913						6.5927	-0.216257	3.41035		1.98464
14.9819	1.13675	-11.6873		5.34328						-3.61915	-0.21418	3.45978		4.23494
17.0641	1.22178	-11.4465		9.40221						-4.12425	-0.208055	3.42301		4.28108
10.2735	1.20147	-11.0498		1.29357						-2.42362	-0.226243	3.43344		3.98176
9.53296	1.18092	-9.74498		1.51272						-0.37711	-0.226747	3.43351		3.51902
10.1081	1.22086	-10.8543		1.48627						9.42268	-0.218043	3.4465		1.39196
11.0791	1.22837	-13.3935		0.21577						8.40246	-0.217708	3.35693		1.52764
10.6039	1.21505	-11.5516		1.33268						5.37623	-0.217212	3.41804		2.25026
4.31116	1.16148	-12.3658		-7.35846						-0.545258	-0.21397	3.44231		3.55898
9.98456	1.20484	-11.3883		0.641482						1.50839	-0.207829	3.4014		3.08791
4.14138	1.16306	-11.141		-6.32427						2.87814	-0.221464	3.46923		2.83183
15.6409	1.27115	-11.02		8.8619						-5.42194	-0.223491	3.39768		4.60943
10.1637	1.22846	-11.6557		0.830055						2.5692	-0.211766	3.36634		2.82227
6.98046	1.28002	-11.1566		-2.2215						-1.47034	-0.213382	3.41195		3.72569
9.29245	1.28341	-12.4054		-0.479303						-4.59335	-0.215981	3.37295		4.36503
7.58854	1.20669	-10.7252		-1.56821						-14.4626	-0.219486	3.37699		6.55133
2.25548	1.2372	-11.5122		-8.72176						12.7519	-0.208844	3.42623		0.763062
15.6828	1.15353	-10.4804		7.61021						-3.8404	-0.216243	3.42051		4.25096
12.4745	1.2451	-11.815		3.71689						7.42627	-0.21487	3.41957		1.82389
0.545811	1.16704	-11.2131		-10.5761						-7.19788	-0.213986	3.4014		4.94165
13.3928	1.17025	-12.0877		3.58515						2.70842	-0.22461	3.42106		2.81272
17.6504	1.21038	-11.7699		9.59389						-3.9237	-0.217083	3.46033		4.3121
10.8033	1.19652	-10.2686		2.65778						-5.1924	-0.223602	3.48038		4.6414
11.0831	1.19244	-12.9125		0.303519						-2.0765	-0.214731	3.42847		3.87436
4.15867	1.17363	-10.9573		-6.07657						4.85469	-0.222293	3.44394		2.36478
12.6006	1.25609	-10.6759		5.15157						-9.30627	-0.223514	3.48122		5.56129
7.62064	1.16966	-11.4868		-2.57324						-8.53505	-0.21193	3.32379		5.13262
-6.48956	1.17589	-11.1715		-18.8025						7.05239	-0.212082	3.4006		1.90491
15.2658	1.16208	-12.2267		5.51328						-3.15003	-0.213525	3.39209		4.0647
11.5874	1.219	-12.5453		1.57964						-2.09816	-0.224644	3.48389		3.95522
11.0018	1.20462	-11.1092		2.14373						-0.466523	-0.224186	3.41786		3.52245
14.1855	1.19012	-12.6185		4.26395						-0.979972	-0.212908	3.39782		3.60646
13.8185	1.17869	-10.8964		5.39131						4.12756	-0.215201	3.36291		2.47466
12.8748	1.15854	-12.2427		2.67324						6.95514	-0.221468	3.46495		1.92461
7.32866	1.16571	-11.7544		-3.21131						-7.05926	-0.22023	3.4057		4.96035
7.62332	1.18163	-11.6865		-2.67859						-5.1621	-0.223831	3.38403		4.53946
9.17334	1.17048	-12.5253		-1.78802						-0.238882	-0.224888	3.46933		3.52305
-2.80868	1.19542	-11.9092		-15.2667						0.0625268	-0.209945	3.43406		3.42094
7.05355	1.20211	-12.0426		-3.56344						-0.223023	-0.22183	3.4363		3.48577
6.61015	1.20676	-11.5361		-3.5592						11.9848	-0.220942	3.39354		0.74559
12.7954	1.25259	-12.6062		3.42114						-0.472036	-0.219281	3.42551		3.52902
11.8844	1.13111	-11.2349		2.20765						-3.30455	-0.226589	3.40742		4.1562
10.613	1.22069	-10.8521		2.10305						-2.72001	-0.219349	3.43349		4.03012
9.35124	1.15137	-11.778		-1.01133						4.48184	-0.219455	3.3809		2.39734
8.18942	1.14848	-10.8913		-1.4859						-6.11348	-0.220084	3.3248		4.67028
12.449	1.16356	-11.8365		2.6486						-1.97022	-0.222691	3.43784		3.87659
9.65615	1.17736	-11.032		0.336747						2.03063	-0.215501	3.38149		2.94389
17.9748	1.30027	-11.5512		11.8209						-1.04731	-0.212371	3.41183		3.63424
8.79518	1.20566	-11.9236		-1.31963						-14.6872	-0.219794	3.48366		6.71181
12.0388	1.17499	-11.75		2.39555						-4.15035	-0.217412	3.44976		4.3521
5.21193	1.18884	-11.7		-5.50388						-5.08431	-0.215975	3.47871		4.57679
-0.805674	1.15761	-12.3982		-13.3308						3.7693	-0.224844	3.45254		2.60503
-4.5469	1.19573	-10.8487		-16.2856						-1.56204	-0.22766	3.44442		3.80003
15.5975	1.16652	-11.4547		6.74016						10.251	-0.222969	3.38565		1.1
2.80239	1.12346	-12.2609		-9.11256						4.28309	-0.208629	3.34365		2.45008
6.62183	1.16358	-11.1837		-3.47864						-4.96365	-0.22327	3.43565		4.54389
9.42135	1.19079	-11.8577		-0.638877						-6.27747	-0.2181	3.44695		4.81606
11.7249	1.23452	-10.6435		3.83126						5.77662	-0.21449	3.35524		2.11621
6.84059	1.19236	-11.8576		-3.70113						-5.07524	-0.218393	3.45732		4.56572
7.17935	1.21632	-11.7043		-2.9719						1.21384	-0.210409	3.33883		3.08343
6.49214	1.20884	-12.0094		-4.16146						5.9589	-0.222162	3.42545		2.10161
13.6462	1.24584	-12.1544		4.84664						5.04655	-0.231533	3.40407		2.23562
11.4751	1.17468	-11.6126		1.86686						-4.88955	-0.225791	3.36423		4.46825
16.151	1.21019	-12.805		6.74088						0.6528	-0.21275	3.43251		3.29363
8.83522	1.19666	-12.7472		-2.1744						2.99152	-0.216056	3.46475		2.81841
2.54628	1.15692	-11.6139		-8.66807						-7.79426	-0.234302	3.45593		5.28214
9.18799	1.2745	-11.2087		0.5014						-9.42543	-0.216166	3.38721		5.42467
14.8488	1.21682	-11.0691		6.99926						-8.86808	-0.210776	3.41625		5.28544
3.93703	1.29434	-11.3971		-6.3013						0.834554	-0.21468	3.51474		3.33557
-2.11156	1.22037	-12.1146		-14.6915						-3.23295	-0.216439	3.414		4.11373
9.91795	1.2427	-11.7956		0.529475						-2.05493	-0.215208	3.34926		3.7915
15.8323	1.27743	-11.5855		8.63907						-1.13602	-0.212735	3.49067		3.73235
11.7227	1.26213	-10.6576		4.13803						-0.243823	-0.214496	3.39458		3.44688
11.5528	1.20751	-10.7925		3.15766						-8.7486	-0.212825	3.48556		5.34748
9.37184	1.22967	-11.1462		0.378053						-1.21776	-0.220528	3.34596		3.61451
14.2292	1.16504	-10.8605		5.71703						-3.2878	-0.219219	3.41136		4.1321
13.5411	1.1557	-12.4559		3.19357						-5.57417	-0.22251	3.45846		4.69877
10.0057	1.19484	-12.5706		-0.615431						0.214182	-0.218917	3.4123		3.36541
13.3304	1.20464	-12.0486		4.0096						0.919561	-0.214666	3.48054		3.28314
4.51914	1.20591	-12.434		-6.98437						-4.33227	-0.206325	3.35769		4.25155
13.0976	1.16644	-12.9058		2.37175						-2.04371	-0.215462	3.39982		3.84016
12.0506	1.17463	-12.5197		1.63535						2.99438	-0.213707	3.39538		2.75546
0.261595	1.19048	-12.1661		-11.8547						6.40094	-0.219749	3.40606		1.99946
7.75609	1.21816	-12.4772		-3.02911						3.64425	-0.226747	3.48936		2.66303
10.6608	1.18501	-11.8456		0.78745						-5.36963	-0.21383	3.41375		4.56193
15.9187	1.12193	-12.4317		5.42799						0.8176	-0.214475	3.4393		3.26394
11.0783	1.24166	-11.1639		2.59165						-3.36216	-0.223249	3.34725		4.09785
8.08533	1.18005	-11.4664		-1.92529						-3.99883	-0.211449	3.43434		4.27989
6.76269	1.13374	-10.9687		-3.30158						-0.455437	-0.226075	3.43825		3.54121
10.9179	1.20499	-11.5323		1.62354						4.18557	-0.211947	3.33205		2.44493
12.6379	1.26295	-11.434		4.52694						-4.45094	-0.224374	3.40832		4.407
11.8171	1.16966	-13.3433		0.478652						-2.86774	-0.217217	3.43088		4.05381
10.3525	1.2003	-11.9708		0.455358						9.29549	-0.223588	3.35618		1.27782
17.2248	1.19944	-13.2085		7.45155						-0.513954	-0.215385	3.4125		3.5232
12.5522	1.23901	-12.1136		3.43878						2.73211	-0.217253	3.41735		2.82379
8.70146	1.23247	-10.7839		-0.0596299						-0.949931	-0.216963	3.40046		3.60656
7.02196	1.20351	-11.2373		-2.78629						9.03076	-0.219929	3.36917		1.38304
11.9443	1.18948	-10.4324		3.7751						-4.19988	-0.220063	3.49243		4.41667
12.9154	1.21403	-11.8124		3.86726						1.77927	-0.23193	3.34714		2.93448
7.66138	1.15571	-11.01		-2.15563						7.14124	-0.216546	3.43443		1.88803
2.42131	1.17536	-11.4546		-8.60872						3.88886	-0.211394	3.3987		2.57662
13.3386	1.21067	-11.5622		4.58654						-9.97196	-0.222462	3.48639		5.70477
6.34854	1.14391	-11.07		-3.80783						-2.6646	-0.210474	3.39845		3.95928
4.55807	1.19191	-11.5866		-6.15383						-8.60092	-0.216208	3.4402		5.29978
8.56197	1.17377	-11.3176		-1.26779						-4.88125	-0.222243	3.45905		4.54388
7.89656	1.14033	-12.0322		-3.02749						-5.13953	-0.220794	3.41658		4.55136
13.2031	1.24892	-12.2457		4.24397						-1.3741	-0.206772	3.47964		3.76377
15.7047	1.17468	-11.0099		7.438						-4.5159	-0.212703	3.37233		4.33287
13.943	1.23558	-11.9823		5.2454						-5.89644	-0.214081	3.35416		4.61648
8.67151	1.16614	-12.4156		-2.30342						2.94064	-0.21741	3.40724		2.76792
5.3696	1.20778	-13.6146		-7.1293						5.26134	-0.21968	3.45891		2.3031
14.9707	1.28032	-11.7649		7.40243						-7.84244	-0.213192	3.42776		5.0997
14.3857	1.21348	-12.1848		5.27185						-5.60612	-0.215066	3.40115		4.60684
13.7305	1.25129	-12.7724		4.40848						-5.30151	-0.225042	3.40396		4.59703
6.82405	1.24598	-11.601		-3.09841						-6.29204	-0.21774	3.46433		4.83436
6.70072	1.26605	-12.2082		-3.72476						-0.314926	-0.214396	3.43801		3.50553
6.97867	1.20484	-11.2113		-2.80314						1.214	-0.216502	3.4573		3.19447
15.548	1.25751	-12.1502		7.40163						3.50261	-0.225093	3.48028		2.69186
12.8184	1.23688	-11.4991		4.35572						-7.32031	-0.223048	3.38378		5.01656
10.3916	1.15741	-12.5431		-0.515745						1.07368	-0.218049	3.46234		3.22822
10.3618	1.23021	-11.5254		1.22178						-0.697403	-0.212819	3.43072		3.57914
0.692739	1.23398	-10.8657		-10.0108						3.06078	-0.216352	3.40326		2.74105
12.3895	1.19071	-11.0949		3.6574						10.4717	-0.217604	3.4025		1.12382
2.22525	1.22441	-10.0329		-7.30827						3.58916	-0.214166	3.41339		2.64471
-2.6004	1.21397	-11.7668		-14.9236						-0.679929	-0.212158	3.48643		3.63068
13.3644	1.2483	-12.8587		3.82405						-4.98553	-0.219382	3.37364		4.46738
13.798	1.28014	-11.3825		6.2809						1.4462	-0.209129	3.39769		3.09525
12.0365	1.14728	-11.2105		2.59878						-6.69726	-0.218492	3.41022		4.87352
9.92788	1.17462	-10.7911		0.870386						10.1506	-0.222548	3.45742		1.19844
9.79734	1.19236	-13.2744		-1.59249						7.48963	-0.218585	3.36707		1.72995
15.641	1.2139	-11.9469		7.03967						5.93774	-0.22025	3.46764		2.15985
9.34982	1.16663	-11.6516		-0.743849						0.519285	-0.215804	3.41687		3.30481
10.1587	1.24027	-12.11		0.489543						0.544988	-0.221003	3.35346		3.23302
7.60284	1.27005	-11.632		-1.97598						-8.0337	-0.214103	3.38741		5.10745
7.66688	1.15983	-10.897		-2.00478						6.62007	-0.222227	3.35954		1.88839
4.21892	1.1452	-11.4815		-6.64996						-1.06018	-0.221831	3.43672		3.6719
8.17722	1.19028	-9.66303		0.0701671						-7.68424	-0.227975	3.40083		5.15264
7.06705	1.1834	-12.428		-4.06481						6.42966	-0.206911	3.38069		2.05032
1.43386	1.22703	-11.8719		-10.1125						-3.23684	-0.210052	3.36971		4.04962
15.5454	1.22485	-10.6312		8.40961						-6.88801	-0.21604	3.45739		4.94548
9.66504	1.1287	-11.1592		-0.250209						-0.406093	-0.222597	3.32553		3.41592
2.05434	1.26296	-10.9538		-8.35928						5.72857	-0.212352	3.47772		2.26125
4.25281	1.24682	-10.4982		-5.19569						-4.89459	-0.22152	3.38017		4.46442
7.40289	1.25476	-11.3529		-2.064						-6.35322	-0.223825	3.49717		4.91918
10.8422	1.23764	-10.6735		2.74515						-2.12357	-0.214992	3.36595		3.8225
11.5653	1.17526	-12.1761		1.41613						14.8778	-0.201427	3.45948		0.462695
8.05889	1.19709	-11.3327		-1.68543						-0.716012	-0.209833	3.39434		3.54458
12.7761	1.29051	-12.3511		4.13668						0.741345	-0.212137	3.41638		3.25912
1.89071	1.23044	-9.6607		-7.3343						4.16893	-0.219164	3.43805		2.52437
8.77027	1.22849	-13.1		-2.32574						4.3125	-0.223712	3.43961		2.47486
5.4125	1.21203	-11.8287		-5.26854						-2.20654	-0.215159	3.46156		3.93631
6.59048	1.25828	-11.0308		-2.73811						-3.58412	-0.219777	3.40589		4.1936
13.9351	1.22189	-12.1011		4.92609						-6.01301	-0.21812	3.41975		4.73131
12.7164	1.17534	-11.1076		3.83851						-7.85963	-0.230213	3.39413		5.20353
7.3317	1.211	-11.6667		-2.78796						-15.5526	-0.224755	3.38277		6.8783
0.0729812	1.20723	-11.3619		-11.2737						1.66808	-0.213797	3.42658		3.06994
5.31535	1.17074	-11.2188		-4.99592						0.238077	-0.218693	3.36508		3.31301
12.1707	1.17953	-10.9392		3.41661						-0.7615	-0.217611	3.35323		3.51894
6.11235	1.16454	-12.5825		-5.46444						-2.46701	-0.221995	3.3761		3.92377
9.24134	1.24511	-10.786		0.720439						-3.75082	-0.223504	3.43725		4.27558
5.50665	1.19986	-10.3892		-3.78197						-9.437	-0.221056	3.4753		5.5614
18.2307	1.18161	-12.3785		9.16306						3.21777	-0.224091	3.40866		2.68759
9.39661	1.14614	-12.637		-1.86718						-1.63859	-0.209137	3.38203		3.72472
11.6217	1.20261	-11.7774		2.19892						4.24972	-0.220283	3.38413		2.44799
16.7098	1.24253	-12.8436		7.91886						-6.22491	-0.216753	3.3712		4.72047
13.105	1.1908	-12.9467		2.65874						4.18275	-0.217781	3.33724		2.42631
6.54884	1.22276	-10.41		-2.40229						1.80457	-0.221394	3.37141		2.97189
6.14961	1.23566	-11.9665		-4.36762						-0.411225	-0.217561	3.47285		3.56232
7.75512	1.23017	-13.4834		-3.94329						-2.64911	-0.216493	3.31224		3.88575
12.2328	1.20434	-11.5956		3.13679						-1.07799	-0.213185	3.43827		3.66808
11.8304	1.14307	-10.9803		2.54262						-2.65678	-0.215368	3.39366		3.96584
8.58696	1.18528	-11.6161		-1.43819						-12.2174	-0.216475	3.40923		6.05398
14.2664	1.22463	-11.9835		5.48757						2.19728	-0.213003	3.31273		2.8447
14.7621	1.1701	-11.3053		5.96779						-0.443491	-0.219127	3.45971		3.5569
5.30368	1.20203	-13.4064		-7.03124						-1.31768	-0.203556	3.44894		3.71716
9.44878	1.21811	-11.4768		0.0329154						-6.92327	-0.220631	3.36808		4.89557
1.68179	1.22245	-11.4824		-9.42653						-7.8144	-0.21872	3.39732		5.10648
11.0579	1.24867	-12.2468		1.56094						-2.68304	-0.216998	3.47374		4.05595
2.23604	1.20076	-10.4353		-7.75037						9.51374	-0.220946	3.44998		1.34796
11.0363	1.21101	-10.8994		2.46572						2.61398	-0.212219	3.47517		2.92043
4.78874	1.18138	-11.1905		-5.53318						-4.50541	-0.227675	3.38919		4.41495
11.7411	1.23933	-10.4447		4.1064						-1.70233	-0.209155	3.49208		3.84813
8.26124	1.22556	-11.8496		-1.72491						6.24266	-0.218007	3.35492		1.99397
8.64741	1.14825	-12.5857		-2.65638						5.13949	-0.213771	3.44458		2.3459
2.9385	1.17702	-13.2599		-9.80125						-6.58993	-0.216833	3.35007		4.77898
14.3458	1.19227	-12.1817		4.92237						-11.3621	-0.220089	3.44541		5.94609
8.49042	1.1289	-10.7579		-1.17306						-3.48013	-0.218674	3.4492		4.21021
8.0885	1.20246	-11.0662		-1.34017						1.86635	-0.212637	3.43056		3.03371
6.26368	1.20574	-12.1564		-4.60403						-5.8043	-0.214792	3.38054		4.62725
10.837	1.21243	-12.2301		0.90903						6.95418	-0.211849	3.51038		2.03714
22.639	1.17644	-11.4378		15.1955						-0.225038	-0.220922	3.40141		3.45112
7.20778	1.19769	-9.83899		-1.20632						6.19276	-0.21661	3.38741		2.046
11.1973	1.23065	-10.7917		2.98821						-1.54313	-0.215354	3.46225		3.79457
14.3196	1.19978	-9.97388		7.20645						1.02931	-0.212416	3.3989		3.18026
7.93708	1.27601	-10.6785		-0.550743						-8.35222	-0.214671	3.43871		5.23168
5.43706	1.20747	-12.2395		-5.67436						-5.5107	-0.212099	3.42954		4.59836
5.12639	1.1558	-11.0603		-5.13523						0.319417	-0.210766	3.46338		3.39606
10.5763	1.1693	-12.4287		-0.0618006						-1.65966	-0.219516	3.4259		3.79022
17.4072	1.19632	-11.3282		9.4964						8.73252	-0.221224	3.4294		1.49756
14.8715	1.25452	-10.6896		7.96686						6.48822	-0.224511	3.34822		1.89155
5.90101	1.20287	-11.989		-4.89087						-1.52961	-0.219336	3.3629		3.6984
7.80041	1.21326	-11.8128		-2.34885						3.11153	-0.215028	3.42554		2.75648
10.0474	1.20554	-11.6878		0.424717						-7.11612	-0.218347	3.37826		4.93204
11.6955	1.17205	-11.5867		2.12106						4.29007	-0.215254	3.44601		2.52256
21.9627	1.24331	-11.8606		15.4458						-0.115778	-0.212505	3.44762		3.47222
6.97906	1.18691	-11.6084		-3.32482						5.67592	-0.210243	3.45097		2.25765
9.08194	1.20432	-10.8158		0.121779						-1.90182	-0.219287	3.36864		3.78568
4.47432	1.23749	-11.2661		-5.72918						-6.76412	-0.224599	3.461		4.98021
14.1983	1.22821	-11.4092		6.02923						-1.68616	-0.211912	3.42578		3.78309
12.4188	1.17109	-12.8946		1.64898						-1.70527	-0.214085	3.36844		3.73351
8.7234	1.17474	-11.7339		-1.48621						-7.40473	-0.214229	3.36001		4.94632
13.3173	1.15089	-12.6097		2.71713						-3.90372	-0.22209	3.39117		4.25815
14.0237	1.23256	-10.6594		6.62555						0.802827	-0.206157	3.42323		3.25772
14.473	1.24918	-11.6735		6.40596						-0.710149	-0.221826	3.42314		3.58067
8.64034	1.16183	-12.0856		-2.04702						-7.46532	-0.21496	3.48078		5.08553
9.30936	1.22458	-11.432		-0.0319774						9.12365	-0.209956	3.43456		1.519
-0.344662	1.22465	-12.8878		-13.3099						-2.11668	-0.219839	3.36665		3.83198
9.5311	1.15225	-11.1179		-0.135695						2.47752	-0.213256	3.45547		2.92713
17.6433	1.16932	-10.3469		10.2839						4.02442	-0.219035	3.38158		2.50009
6.47427	1.22569	-12.1549		-4.21944						6.46896	-0.229998	3.41022		1.92237
5.88191	1.21065	-11.4491		-4.32817						-2.11285	-0.217092	3.43625		3.89494
8.52806	1.22661	-11.3489		-0.888285						4.12629	-0.220478	3.38574		2.47598
9.57368	1.18993	-12.0806		-0.688588						4.7828	-0.213718	3.50479		2.48262
14.5056	1.16067	-11.198		5.63827						-0.894003	-0.216997	3.42241		3.61641
12.2527	1.17058	-11.2637		3.07912						-5.2658	-0.205598	3.41817		4.50081
11.0837	1.2177	-12.9291		0.567492						-0.549161	-0.219352	3.38565		3.50611
2.1991	1.23643	-11.098		-8.37897						4.11202	-0.218332	3.39417		2.49638
14.4343	1.20511	-13.0466		4.34837						1.29723	-0.217661	3.40699		3.12463
10.2036	1.22431	-10.9517		1.54062						10.4309	-0.223372	3.50331		1.17335
-0.251409	1.22665	-11.9743		-12.2827						-5.73868	-0.22012	3.43948		4.70268
16.3037	1.20669	-11.2222		8.4513						-1.20191	-0.222787	3.44196		3.70973
13.9965	1.19337	-11.7468		4.95609						-8.38367	-0.221631	3.38361		5.24169
10.1347	1.24119	-12.0333		0.545783						11.1772	-0.218999	3.42005		0.972249
-1.41386	1.25752	-12.7658		-14.5437						-1.89322	-0.216521	3.34822		3.75814
10.5467	1.19521	-12.4292		0.176351						-5.83924	-0.210226	3.4396		4.66716
2.6085	1.20433	-11.2702		-8.12872						-2.2851	-0.220089	3.43229		3.93521
9.50677	1.19821	-11.2482		0.142938						6.60191	-0.220396	3.424		1.96896
1.82002	1.27072	-10.1757		-7.86299						-0.101764	-0.230553	3.4021		3.42556
10.2129	1.24842	-11.2733		1.47664						-5.75168	-0.211478	3.34838		4.56474
13.2893	1.20435	-11.2405		4.76444						2.83096	-0.217895	3.41736		2.80051
13.3905	1.17936	-10.9585		4.83366						-1.04202	-0.213386	3.45269		3.67505
10.5714	1.21195	-11.9842		0.827864						-5.74109	-0.209368	3.42247		4.62447
12.2017	1.14949	-10.6223		3.40354						-3.93132	-0.207455	3.38449		4.20007
9.31289	1.19618	-10.9074		0.232428						12.4988	-0.215649	3.42452		0.729158
7.46906	1.18803	-11.1173		-2.24385						-5.99298	-0.219349	3.37969		4.69424
9.8855	1.18845	-11.8641		-0.115648						-1.0918	-0.227558	3.38976		3.6382
5.91823	1.20732	-11.2728		-4.12756						-1.1782	-0.215165	3.38168		3.63519
14.9732	1.182	-12.0533		5.64506						-0.778253	-0.214898	3.42306		3.59031
14.1642	1.25444	-11.3803		6.38771						4.36394	-0.210493	3.41301		2.49442
14.2401	1.1948	-10.2695		6.74461						-1.28965	-0.222757	3.35604		3.64332
3.54745	1.17131	-11.9601		-7.80489						11.8141	-0.211058	3.54711		1.05365
6.30965	1.23013	-12.358		-4.59632						4.73357	-0.223077	3.41448		2.35853
7.6792	1.20454	-11.9946		-2.74465						-5.28675	-0.227492	3.3823		4.58499
11.8343	1.21934	-11.9199		2.51016						-0.916608	-0.215737	3.44507		3.64281
5.6781	1.17033	-11.6569		-5.01162						-2.99165	-0.215686	3.45234		4.0976
1.32412	1.14936	-11.0156		-9.49376						6.93925	-0.22396	3.40605		1.85193
5.6484	1.22924	-13.0863		-6.14312						-2.35375	-0.213948	3.39692		3.9005
5.63428	1.19243	-11.7557		-5.03723						3.26461	-0.228413	3.38001		2.63433
10.7222	1.18886	-11.8928		0.854336						4.97732	-0.220605	3.42095		2.32293
8.92691	1.23132	-11.5599		-0.568049						-4.35815	-0.208494	3.42473		4.33338
11.067	1.19235	-13.1376		0.0581289						2.21753	-0.219332	3.44353		2.95716
6.47519	1.21322	-11.2448		-3.38895						-7.38062	-0.217316	3.41617		5.0201
9.65077	1.23177	-10.5625		1.32494						-1.01402	-0.220325	3.47044		3.69385
5.74605	1.15447	-11.929		-5.29529						5.25118	-0.214407	3.38946		2.26357
7.44025	1.23589	-11.9724		-2.77706						-0.523588	-0.21684	3.32537		3.4389
9.20682	1.2058	-11.9479		-0.846331						-3.60662	-0.215047	3.42988		4.20547
6.3689	1.14056	-12.4958		-5.2317						-3.9616	-0.226997	3.39353		4.2928
11.8404	1.20179	-12.499		1.73073						2.44415	-0.212962	3.35624		2.83573
16.6707	1.23606	-11.4851		9.12093						-2.32646	-0.215947	3.42699		3.92939
9.24204	1.18533	-10.2846		0.670253						-4.28285	-0.213821	3.50829		4.42405
9.46954	1.16874	-11.2147		-0.147275						-0.899625	-0.221013	3.40155		3.60038
6.51944	1.15152	-11.0053		-3.49805						-2.14526	-0.226133	3.29169		3.77681
14.3319	1.15811	-10.3512		6.24674						-0.985399	-0.217353	3.37674		3.59092
2.36035	1.19872	-11.4021		-8.57266						-1.051	-0.212591	3.43991		3.66334
8.84815	1.18138	-11.3061		-0.853039						12.162	-0.217693	3.44966		0.802083
15.7059	1.23173	-10.2074		9.13808						3.28041	-0.217371	3.44963		2.73656
2.79151	1.24082	-11.3435		-7.8797						3.76399	-0.222521	3.36579		2.52822
13.8405	1.15821	-12.8456		3.18462						1.71092	-0.215477	3.34046		2.97179
5.37977	1.20343	-10.8814		-4.40723						1.85038	-0.213221	3.39645		3.00191
14.2515	1.23018	-10.7399		6.79197						-7.25068	-0.221822	3.45862		5.06699
3.75623	1.20905	-11.6325		-7.09108						-7.11069	-0.216436	3.40212		4.94113
15.6578	1.19995	-10.6412		8.14741						4.04928	-0.207421	3.4118		2.57189
10.6587	1.21654	-12.4951		0.471592						-6.62726	-0.227178	3.43994		4.94551
9.8419	1.24605	-11.3376		0.925936						7.03953	-0.217173	3.51575		1.98696
10.9278	1.2303	-11.9471		1.4974						-7.4248	-0.219775	3.37539		5.00718
9.10925	1.12712	-11.6194		-1.35218						-0.503727	-0.212863	3.47866		3.58589
4.75088	1.20326	-12.3324		-6.61588						0.772375	-0.221352	3.43357		3.2626
13.5174	1.20953	-12.536		3.81368						-8.87096	-0.209347	3.37831		5.23542
8.11206	1.20409	-11.5531		-1.78541						-8.05712	-0.22577	3.44194		5.261
7.41091	1.1978	-12.2391		-3.36235						-1.88064	-0.225826	3.43535		3.86004
13.6765	1.1724	-11.1538		4.88048						-2.89117	-0.214734	3.446		4.06683
5.50249	1.19917	-11.5853		-4.98689						0.50755	-0.221203	3.42054		3.30827
9.73952	1.15769	-12.7986		-1.5232						-0.999467	-0.219487	3.41819		3.63756
4.16757	1.13615	-10.1735		-5.43847						4.10195	-0.211989	3.40794		2.53837
1.77229	1.20177	-11.3743		-9.24441						3.92506	-0.220713	3.41545		2.54914
3.60215	1.24103	-12.5693		-8.0989						-5.78661	-0.210889	3.43731		4.65764
8.80088	1.18256	-11.4623		-1.05474						9.60487	-0.223341	3.41073		1.26558
8.44305	1.17037	-11.1539		-1.27234						-13.0439	-0.224925	3.42619		6.36008
2.65123	1.23897	-11.6916		-8.40684						2.94848	-0.222542	3.401		2.74484
12.326	1.24518	-11.9554		3.39267						2.72734	-0.215653	3.34846		2.7603
12.2992	1.20675	-12.3877		2.45427						-0.00985392	-0.228019	3.34282		3.34507
14.2347	1.1553	-9.79942		6.64591						5.5108	-0.221745	3.45543		2.23344
2.45614	1.18746	-11.6116		-8.69504						-0.819029	-0.21742	3.40635		3.58442
17.0777	1.18977	-12.4742		7.84447						4.94512	-0.22122	3.43452		2.34056
10.2304	1.29284	-12.1437		1.0826						3.73238	-0.212309	3.44214		2.64972
14.0186	1.2206	-10.4946		6.61659						-5.8722	-0.214926	3.38338		4.64546
10.431	1.19881	-10.9001		1.60471						-2.70423	-0.213787	3.40924		3.98737
9.39202	1.13948	-11.91		-1.208						-5.22583	-0.22165	3.50522		4.66353
6.07674	1.18328	-12.0164		-4.82588						1.6171	-0.222093	3.39177		3.03263
12.9689	1.19157	-10.5204		4.93294						-2.83502	-0.21891	3.41292		4.03354
5.33457	1.23744	-11.1658		-4.56452						-5.15557	-0.21369	3.36072		4.46241
14.5039	1.24544	-11.9139		6.14988						-1.68236	-0.221221	3.41571		3.78788
2.85619	1.22421	-11.4021		-7.90553						2.24926	-0.219962	3.48652		2.99177
4.89877	1.21433	-11.3609		-5.41223						-2.89878	-0.223934	3.46544		4.11458
7.71337	1.15304	-11.0333		-2.13949						0.374706	-0.214044	3.43945		3.35924
5.38871	1.21931	-11.6457		-5.07523						-7.05101	-0.220537	3.40303		4.95804
7.32482	1.1298	-12.4244		-4.14881						-10.1842	-0.214307	3.52729		5.70984
8.77241	1.23538	-10.1119		0.725358						-11.7149	-0.220329	3.35075		5.93189
6.80016	1.23535	-11.2811		-2.88051						4.73978	-0.218771	3.43833		2.40141
7.20747	1.20392	-12.0057		-3.32853						8.34044	-0.216892	3.42527		1.61629
7.39193	1.26136	-10.9495		-1.62561						0.28955	-0.221476	3.44486		3.38073
3.31249	1.18856	-11.7726		-7.83549						3.99254	-0.224174	3.44278		2.54776
20.267	1.22248	-11.9357		12.8402						-3.18075	-0.219094	3.45596		4.15284
6.19882	1.21848	-10.712		-3.15885						-0.826449	-0.209483	3.42986		3.60298
6.65296	1.26045	-11.9719		-3.58616						-12.1372	-0.223336	3.44629		6.15697
14.2679	1.20578	-11.0111		6.19281						-4.16127	-0.218873	3.42068		4.33147
12.5798	1.20702	-11.6383		3.54576						-6.93125	-0.212731	3.38142		4.85591
7.05603	1.23738	-11.7964		-3.06543						-1.22596	-0.208621	3.38633		3.64209
10.7769	1.22221	-10.0923		3.07926						3.42414	-0.213838	3.44683		2.71462
6.21673	1.21218	-11.2723		-3.73657						-6.45066	-0.21724	3.42497		4.82631
7.58267	1.13721	-11.9254		-3.30232						8.59919	-0.222007	3.51904		1.60996
11.3096	1.2699	-11.7175		2.64453						4.31326	-0.217417	3.47109		2.53331
10.6399	1.22584	-10.8182		2.22464						-6.40768	-0.212021	3.39303		4.75159
11.5787	1.23049	-10.6106		3.63695						-1.58709	-0.216974	3.37469		3.71904
12.8026	1.20129	-11.0898		4.28992						-3.32197	-0.215339	3.43512		4.15047
9.9493	1.19983	-13.1348		-1.19733						-5.30357	-0.21876	3.42617		4.58638
9.73955	1.203	-11.8948		-0.178076						-2.50428	-0.216313	3.41454		3.95625
7.40668	1.21072	-10.9289		-1.96145						-4.86159	-0.222373	3.41812		4.49921
9.37128	1.22902	-11.4424		0.0750974						-4.79043	-0.225045	3.40375		4.48181
13.2245	1.18663	-11.4877		4.20486						-20.2564	-0.222545	3.3639		7.87186
8.30753	1.15996	-12.0837		-2.4473						3.14663	-0.214477	3.52617		2.8513
12.9251	1.2057	-12.1059		3.47799						-0.645012	-0.221691	3.42334		3.56633
14.3629	1.15567	-11.1063		5.49249						-1.77606	-0.220072	3.38731		3.77817
8.51697	1.18954	-12.0761		-1.9448						-2.60934	-0.20542	3.41704		3.95305
11.707	1.27907	-11.9211		3.05303						1.88657	-0.210512	3.42566		3.02851
13.9762	1.22408	-11.1767		5.93129						0.13241	-0.224764	3.40239		3.37263
-1.97357	1.15779	-10.2814		-12.5663						1.66008	-0.219236	3.40934		3.04539
11.8363	1.18566	-10.5959		3.43788						-7.23338	-0.223821	3.37076		4.98974
8.495	1.20735	-11.2257		-0.969246						5.82031	-0.219325	3.42903		2.15249
10.321	1.24313	-12.1625		0.667811						4.36965	-0.208863	3.44282		2.53016
0.500047	1.21276	-11.3084		-10.702						1.38218	-0.214024	3.39704		3.10122
11.9233	1.21337	-11.7646		2.70278						-3.51857	-0.20959	3.38254		4.11999
22.5689	1.19917	-11.9782		15.0858						-2.12953	-0.212681	3.48504		3.93795
8.37056	1.19509	-11.8459		-1.84232						5.9507	-0.210213	3.41975		2.16883
10.6639	1.19619	-12.2889		0.467107						6.32113	-0.220246	3.38871		1.9965
14.6365	1.19286	-10.8726		6.58662						-2.9497	-0.215388	3.43679		4.07212
9.22157	1.17444	-13.1297		-2.29952						-1.93075	-0.211851	3.39022		3.79925
8.90102	1.20926	-12.5247		-1.76097						-1.91443	-0.222111	3.39952		3.82474
7.49865	1.16083	-11.4493		-2.74469						-2.70625	-0.214636	3.35314		3.934
16.7792	1.17715	-11.3778		8.37389						-1.48428	-0.216716	3.40685		3.72851
5.78555	1.14882	-11.6965		-5.04994						-1.44668	-0.217052	3.44357		3.75757
11.5586	1.1895	-11.9947		1.7542						2.24192	-0.216879	3.43292		2.94669
10.8557	1.20543	-11.4248		1.66094						-0.634466	-0.218354	3.38414		3.52268
11.8714	1.18796	-13.1119		0.990919						-1.12307	-0.215089	3.4557		3.69726
5.92512	1.1682	-13.3731		-6.45134						-4.86504	-0.225001	3.44123		4.53587
12.1751	1.19736	-11.5164		3.06161						2.79559	-0.221699	3.35768		2.7379
16.1514	1.23709	-11.6294		8.35138						-4.80859	-0.225006	3.44796		4.52992
3.92442	1.22393	-13.1923		-8.38912						-4.6887	-0.222593	3.40185		4.44552
10.8761	1.16196	-12.2516		0.385873						3.3054	-0.222148	3.4756		2.74131
7.98605	1.18047	-12.0047		-2.57738						-7.95184	-0.204424	3.39722		5.02277
4.54906	1.20983	-9.76057		-4.25696						-5.88815	-0.219002	3.45377		4.74328
1.85192	1.25215	-10.7053		-8.3864						1.95047	-0.223035	3.39461		2.95958
6.82018	1.21795	-12.6414		-4.33479						1.84243	-0.208714	3.33962		2.95507
7.38608	1.21648	-11.647		-2.66194						-3.14861	-0.215904	3.36954		4.04933
4.85744	1.17915	-10.5435		-4.81587						0.0883115	-0.214795	3.40493		3.38596
2.40757	1.23971	-11.5467		-8.56199						0.721753	-0.211664	3.38159		3.22882
17.2536	1.20118	-12.8719		7.85283						10.5434	-0.219488	3.47939		1.16523
4.78385	1.23005	-11.8953		-6.01087						-1.08491	-0.214783	3.4609		3.69392
9.89365	1.21026	-11.7184		0.25549						4.71867	-0.226667	3.3966		2.32704
4.29447	1.26314	-11.3416		-5.91714						2.1626	-0.220093	3.44738		2.9714
15.6953	1.22215	-11.7768		7.40525						1.09942	-0.212093	3.41409		3.18091
2.02725	1.23735	-12.5331		-10.0247						5.35471	-0.224279	3.43419		2.23325
0.271661	1.19653	-12.7794		-12.4544						4.25809	-0.203844	3.46043		2.59244
5.31628	1.22409	-12.2585		-5.75094						-6.95472	-0.216139	3.46882		4.972
7.29507	1.22146	-10.5684		-1.65775						1.06529	-0.211722	3.4084		3.18286
9.61889	1.21087	-14.0274		-2.3801						7.71821	-0.210376	3.36279		1.73907
5.58521	1.21878	-10.448		-3.64091						1.41213	-0.218255	3.35826		3.05005
7.87626	1.18749	-11.7593		-2.40638						0.0876419	-0.212406	3.35393		3.33531
9.93454	1.2277	-13.3997		-1.20297						-1.08392	-0.211643	3.38069		3.6101
2.43299	1.17035	-10.8774		-8.02991						-9.24598	-0.218169	3.34609		5.36327
9.68675	1.21167	-10.6803		1.05676						-5.55783	-0.227489	3.40112		4.66546
9.71955	1.21463	-11.6037		0.201949						-3.95589	-0.22976	3.38091		4.28982
15.2289	1.17469	-12.2049		5.68442						1.67914	-0.215937	3.46291		3.10032
1.26916	1.22084	-10.5534		-9.004						-1.10012	-0.21572	3.46621		3.70353
11.4391	1.21384	-11.6686		2.21668						-4.0355	-0.214917	3.37705		4.24434
10.7591	1.19008	-11.3189		1.48533						-10.867	-0.208691	3.46869		5.73654
0.594922	1.2312	-11.5205		-10.788						-2.42884	-0.225516	3.42201		3.96976
16.7133	1.26112	-11.3486		9.72886						-3.69211	-0.21208	3.37439		4.15742
3.6283	1.19095	-11.2086		-6.88752						-3.09756	-0.220751	3.48761		4.1714
4.26366	1.27247	-11.1447		-5.71935						5.99388	-0.217963	3.40016		2.09372
9.09342	1.20225	-12.3862		-1.45364						-10.2531	-0.221533	3.52439		5.7958
5.28498	1.1288	-11.171		-5.20536						2.41248	-0.225233	3.40311		2.85974
9.01456	1.12824	-11.3906		-1.22003						-0.53096	-0.208203	3.49082		3.60136
8.00789	1.25064	-11.6089		-1.5939						-3.3133	-0.214958	3.46028		4.17251
8.13466	1.17877	-13.5537		-3.96483						10.3586	-0.212504	3.38562		1.18437
5.23633	1.23445	-12.1921		-5.72817						-4.30615	-0.226275	3.39523		4.3696
0.0969856	1.2069	-13.0739		-12.9569						-2.47858	-0.220338	3.49606		4.04219
6.25446	1.15357	-11.5484		-4.3335						-0.906141	-0.216372	3.48699		3.68305
4.10854	1.19094	-11.4206		-6.52755						1.75076	-0.217364	3.48768		3.10713
9.60721	1.19699	-11.8241		-0.324316						7.29966	-0.219127	3.39116		1.79161
9.5321	1.18247	-10.3289		0.942556						-6.72993	-0.217329	3.44905		4.91165
10.5506	1.14062	-12.0733		-0.0390214						-0.889477	-0.211679	3.45178		3.64007
17.7502	1.17421	-11.8416		9.00085						-5.13351	-0.220234	3.38528		4.51585
5.59849	1.2113	-11.496		-4.71456						-2.90119	-0.213778	3.42357		4.04378
9.80301	1.2356	-12.265		-0.152336						-1.87844	-0.207275	3.4773		3.86666
14.348	1.20184	-13.4911		3.75295						-2.4701	-0.229027	3.38609		3.95181
9.07792	1.26626	-12.9092		-1.41423						0.17369	-0.214077	3.44213		3.40495
16.6521	1.27239	-11.7677		9.42022						-1.19551	-0.214714	3.45984		3.71653
16.0964	1.1513	-10.8752		7.65657						6.0293	-0.218881	3.43461		2.11492
7.73947	1.20899	-12.4518		-3.09486						0.66518	-0.221918	3.48594		3.33833
11.0917	1.21178	-11.818		1.62276						1.12456	-0.217755	3.42102		3.17614
7.59358	1.2504	-12.1269		-2.63185						-0.868488	-0.212536	3.43926		3.62385
7.64502	1.17589	-11.6221		-2.63237						-0.708373	-0.21598	3.41145		3.56444
3.39599	1.18539	-11.6106		-7.58504						-1.7497	-0.217659	3.51307		3.89391
1.87806	1.20695	-11.3151		-9.04837						-4.46339	-0.220638	3.34707		4.33186
14.5527	1.19699	-11.7887		5.63073						-7.82034	-0.213825	3.45222		5.1244
6.61375	1.21865	-13.2307		-5.17087						0.428425	-0.21956	3.46669		3.37262
8.82042	1.21052	-11.577		-0.899703						-5.69475	-0.225829	3.40895		4.69499
6.70398	1.24196	-13.0922		-4.76612						-2.71336	-0.210809	3.57791		4.14991
16.8711	1.20421	-11.726		8.59037						8.05071	-0.215096	3.44315		1.71148
5.21092	1.20102	-12.2651		-6.00672						2.33954	-0.210258	3.41891		2.927
12.0877	1.24398	-11.8493		3.18765						-3.80352	-0.217233	3.39101		4.21726
5.64086	1.21247	-11.5641		-4.72474						4.60396	-0.208445	3.4416		2.48193
7.68798	1.20351	-12.8536		-3.60104						-0.196356	-0.215405	3.409		3.4513
12.9811	1.21575	-11.9314		3.85038						-2.03566	-0.212253	3.35781		3.78988
21.4098	1.19933	-11.4739		14.2035						-1.58192	-0.217728	3.34588		3.69031
8.33952	1.22118	-10.9236		-0.739554						2.16735	-0.22043	3.37804		2.90029
13.0409	1.19156	-11.1482		4.39093						2.48126	-0.21364	3.44018		2.91008
16.5536	1.12536	-11.0441		7.58462						4.10766	-0.220338	3.41535		2.51028
2.85458	1.26157	-12.2486		-8.64741						-6.00313	-0.216849	3.35517		4.65694
12.7829	1.21013	-11.3062		4.16279						6.57711	-0.228649	3.41181		1.90796
11.0263	1.2156	-12.0068		1.39667						-2.39562	-0.219372	3.42011		3.94565
17.7579	1.23935	-10.9852		11.0231						2.39721	-0.224353	3.46314		2.92531
11.4848	1.18476	-11.4311		2.17566						8.27822	-0.226676	3.39999		1.52352
4.12031	1.22075	-11.5119		-6.48204						-2.64624	-0.229351	3.43283		4.03975
13.4062	1.18938	-13.2138		2.73129						-7.2045	-0.216339	3.39764		4.95626
10.7477	1.22478	-12.1705		0.993118						9.75249	-0.220536	3.41346		1.26269
9.22832	1.15191	-12.4948		-1.86455						3.17808	-0.214629	3.49581		2.8137
16.3655	1.21955	-11.0403		8.91829						-11.6071	-0.218843	3.42115		5.96128
10.174	1.18206	-10.3538		1.67242						-12.5588	-0.217517	3.45566		6.1874
2.07028	1.19028	-12.1931		-9.72888						-0.771196	-0.220322	3.44528		3.61519
10.1899	1.24083	-12.2343		0.409615						1.88538	-0.217427	3.34638		2.93645
8.79156	1.22989	-12.3635		-1.55091						-1.44942	-0.214482	3.47267		3.78354
10.238	1.18303	-11.9879		0.12407						2.75813	-0.224664	3.47701		2.85736
12.9423	1.16677	-12.5512		2.54958						2.53471	-0.219946	3.36924		2.81174
7.51525	1.22798	-12.6302		-3.40162						-13.4327	-0.225245	3.40042		6.42607
15.3967	1.19252	-10.972		7.38888						-10.9417	-0.227251	3.44051		5.92703
2.74555	1.23557	-12.0374		-8.64511						7.26727	-0.215702	3.39849		1.83092
4.38345	1.18246	-12.1014		-6.91819						2.07859	-0.221035	3.45238		2.99294
10.3448	1.19982	-11.8806		0.531291						-2.32075	-0.210187	3.36502		3.85281
10.8985	1.24862	-11.9263		1.68181						-1.3002	-0.228172	3.50462		3.80129
16.9138	1.14776	-12.243		7.16986						-0.946516	-0.216991	3.39506		3.60045
12.0076	1.20701	-11.0009		3.49241						-0.0282812	-0.224879	3.44452		3.45088
8.7309	1.24597	-10.6049		0.273597						2.56437	-0.221128	3.40674		2.83969
10.4101	1.12381	-10.7327		0.966219						11.7961	-0.225102	3.49775		0.84242
9.8066	1.19052	-12.0121		-0.337081						-2.38988	-0.223658	3.42127		3.95578
15.2558	1.18074	-11.8762		6.13694						-3.94398	-0.215983	3.36868		4.22052
13.482	1.22809	-12.8713		3.68586						-4.40643	-0.218081	3.42748		4.38844
8.37982	1.26132	-12.2919		-1.72226						-1.46564	-0.218202	3.49031		3.81011
11.7848	1.16533	-12.6558		1.07735						-4.13854	-0.224256	3.38215		4.31024
16.7699	1.2109	-10.7535		9.55318						0.811374	-0.220919	3.36462		3.18537
7.15494	1.23233	-11.6429		-2.82568						3.93197	-0.217027	3.40239		2.54904
9.27916	1.2449	-13.1865		-1.63487						-7.02391	-0.208569	3.44172		4.90669
10.0451	1.19637	-12.718		-0.700298						2.159	-0.222679	3.48453		3.00377
6.21043	1.2255	-12.8043		-5.19349						-5.02046	-0.219317	3.484		4.58508
7.19599	1.20291	-10.8653		-2.20916						4.58704	-0.225612	3.40056		2.36567
5.28996	1.23193	-13.1149		-6.59804						5.9323	-0.214647	3.39397		2.12061
10.2126	1.17168	-10.8878		1.078						-4.07354	-0.232038	3.37377		4.31899
10.5775	1.22868	-11.6376		1.35875						-0.63104	-0.22532	3.47969		3.62187
11	1.11196	-11.8391		0.392456						-8.47268	-0.221635	3.47162		5.34946
6.7229	1.20643	-10.7284		-2.61769						3.16542	-0.227607	3.39827		2.6778
6.71528	1.19011	-11.3062		-3.31429						8.10949	-0.213422	3.45346		1.72272
7.53442	1.12997	-10.5562		-2.04252						-5.70304	-0.217904	3.38405		4.62676
7.88859	1.19088	-11.1586		-1.76429						-2.51467	-0.221441	3.38526		3.94211
11.3491	1.16868	-11.8892		1.37426						-1.03702	-0.209919	3.39066		3.60835
14.8987	1.17367	-11.5694		5.91671						-1.32416	-0.20642	3.43859		3.71192
11.5984	1.14438	-12.0618		1.2111						-6.60217	-0.223149	3.38132		4.85459
18.9263	1.20189	-13.5011		9.24625						0.992357	-0.219233	3.47939		3.26183
12.0259	1.19818	-10.9444		3.4648						3.56094	-0.211791	3.33426		2.58009
6.09444	1.25131	-12.1199		-4.49384						10.3521	-0.229838	3.43957		1.06027
9.28417	1.24236	-10.329		1.20528						-3.19621	-0.22006	3.37629		4.07964
19.6144	1.26593	-11.0297		13.8007						-2.50456	-0.216513	3.51432		4.05659
7.39502	1.24333	-10.1944		-0.999925						7.71582	-0.220842	3.49962		1.79564
7.64241	1.16988	-10.3364		-1.39568						-1.87546	-0.210993	3.4261		3.82181
13.0908	1.25146	-10.7282		5.65435						-12.2949	-0.209595	3.45641		6.03336
5.73965	1.27004	-10.7226		-3.43297						7.77506	-0.21722	3.39702		1.70812
7.19815	1.19675	-11.5095		-2.89505						-3.50059	-0.226595	3.47168		4.2649
15.2388	1.20575	-12.5331		5.84108						-1.13713	-0.212814	3.40918		3.65118
16.0366	1.19863	-10.4938		8.7281						5.69664	-0.217448	3.36453		2.12581
12.6881	1.24861	-13.2583		2.58425						2.89225	-0.216409	3.4573		2.83139
4.45065	1.19948	-13.1443		-7.80585						-4.99662	-0.222296	3.41996		4.53069
11.9532	1.1936	-9.80983		4.45751						2.00086	-0.211736	3.44821		3.02455
7.85935	1.19291	-10.9897		-1.6142						-4.82984	-0.223665	3.4382		4.51846
3.8218	1.16678	-10.9346		-6.47543						-1.01985	-0.219813	3.4675		3.69168
14.7142	1.21949	-12.0855		5.85835						-1.55168	-0.221752	3.43508		3.77917
10.6609	1.16978	-12.756		-0.285111						12.6026	-0.216565	3.39466		0.665394
14.8569	1.16922	-12.618		4.75301						-8.85289	-0.215895	3.4529		5.3642
10.5083	1.19932	-11.6819		0.920934						-8.74305	-0.227537	3.43343		5.4228
11.2342	1.17652	-11.2834		1.93394						6.17683	-0.218047	3.42639		2.07955
10.9128	1.25887	-12.1567		1.58108						2.20019	-0.21928	3.40621		2.92375
11.8512	1.16666	-12.3488		1.47763						3.90721	-0.222498	3.42028		2.55093
6.43963	1.17889	-11.2672		-3.67558						-3.30033	-0.211735	3.50335		4.20215
8.52082	1.25987	-10.4096		0.325524						-0.58015	-0.219657	3.48155		3.60898
4.37043	1.21155	-9.99077		-4.69575						-0.177406	-0.218116	3.41645		3.45514
10.8611	1.25393	-11.4173		2.20171						1.90639	-0.218634	3.37863		2.96182
5.69579	1.16726	-11.6754		-5.02691						3.47403	-0.221834	3.43177		2.66112
7.83818	1.2188	-10.9033		-1.35014						2.67039	-0.216498	3.4038		2.82567
3.17377	1.22383	-12.6917		-8.80759						7.53803	-0.221932	3.47435		1.80142
13.692	1.17652	-11.7663		4.34254						9.54628	-0.209334	3.40175		1.40339
7.15096	1.2012	-11.3967		-2.80693						-1.97111	-0.214583	3.41854		3.84151
7.95829	1.16269	-10.6099		-1.35682						-6.2651	-0.209112	3.38658		4.69669
10.5827	1.31503	-10.7408		3.17565						-2.26587	-0.214117	3.40791		3.89307
5.48661	1.25338	-12.3624		-5.4856						-0.569882	-0.20706	3.44575		3.56375
3.29497	1.24246	-11.3477		-7.25385						4.55697	-0.214252	3.37513		2.39879
19.9829	1.22534	-11.8324		12.6534						8.64371	-0.210884	3.42586		1.60304
14.0053	1.23683	-10.9889		6.33329						9.24775	-0.217992	3.41465		1.39872
8.60496	1.17442	-10.9972		-0.891425						-7.79606	-0.216636	3.45878		5.14768
6.2905	1.21465	-10.4694		-2.82866						-6.82038	-0.217264	3.47141		4.95323
1.25532	1.22526	-11.4461		-9.90804						-8.63297	-0.214956	3.3885		5.24421
8.16065	1.20538	-12.6179		-2.78127						6.34624	-0.216019	3.385		2.01409
6.6784	1.19089	-11.3239		-3.37062						-1.06982	-0.208918	3.43054		3.65404
9.68039	1.27157	-12.7698		-0.46057						-4.41369	-0.210692	3.44916		4.37909
16.2418	1.19825	-12.8859		6.5758						-2.8159	-0.214845	3.38227		3.98725
3.73241	1.213	-12.879		-8.35161						-4.36725	-0.212796	3.46346		4.39279
3.02208	1.18767	-10.8472		-7.25799						6.57072	-0.214982	3.35114		1.93856
4.86894	1.23474	-11.9524		-5.94049						-6.03517	-0.223771	3.45679		4.80729
14.1824	1.20548	-11.4788		5.61783						11.8467	-0.210415	3.37123		0.878501
6.64471	1.17037	-11.6153		-3.83847						0.34935	-0.214584	3.39979		3.32482
18.2718	1.24154	-12.4435		10.2417						-1.89464	-0.218128	3.44481		3.85808
2.33885	1.19072	-10.4697		-7.68483						14.8649	-0.226806	3.42525		0.0537934
17.6899	1.19098	-10.96		10.1082						-3.96212	-0.220115	3.36668		4.2388
9.36404	1.18926	-11.2981		-0.161778						4.84883	-0.223693	3.42094		2.33629
1.6257	1.27445	-11.5445		-9.47265						7.09024	-0.217468	3.41923		1.87733
2.64069	1.20972	-11.1454		-7.95086						-7.81439	-0.213316	3.45305		5.11998
6.46137	1.1915	-12.5797		-4.881						2.02398	-0.215325	3.38104		2.94523
12.302	1.15971	-11.102		3.16478						-5.92173	-0.216264	3.47531		4.75597
0.531842	1.23075	-11.1715		-10.5169						6.08171	-0.22654	3.38876		2.01101
7.78318	1.15901	-12.358		-3.33721						4.92006	-0.22143	3.38236		2.29291
12.8447	1.21743	-11.443		4.19453						-3.63088	-0.224507	3.49682		4.31198
10.8467	1.19986	-11.6455		1.36906						-4.39982	-0.220853	3.42163		4.39334
7.11974	1.17557	-11.6604		-3.2906						3.90079	-0.214939	3.43832		2.59989
7.10741	1.17728	-11.8691		-3.5017						-7.14062	-0.211102	3.43965		4.94704
14.5051	1.1843	-10.9168		6.26168						-0.0243778	-0.214026	3.43281		3.43803
14.9074	1.22238	-12.7156		5.50695						3.0161	-0.220554	3.34731		2.6821
16.42	1.22453	-10.9533		9.15339						4.71908	-0.217012	3.38776		2.36366
0.572162	1.14053	-11.8363		-11.1837						-1.45451	-0.223626	3.40256		3.72783
15.6816	1.27072	-11.7892		8.13775						5.87576	-0.206532	3.43444		2.22091
15.0258	1.17587	-12.3204		5.34792						-6.53199	-0.21436	3.35564		4.75583
3.74776	1.18645	-11.7897		-7.3432						-4.66224	-0.217515	3.46772		4.48183
-0.740962	1.15167	-11.9962		-12.8495						6.64869	-0.217553	3.41378		1.96733
8.94783	1.15219	-11.5058		-1.19626						5.86466	-0.218141	3.38589		2.10657
20.9042	1.1779	-11.5139		13.1092						-1.75533	-0.217564	3.47002		3.85192
5.66071	1.2127	-11.0918		-4.22705						1.22606	-0.216698	3.41892		3.15323
4.87901	1.20235	-11.6439		-5.77761						6.44794	-0.222334	3.44466		2.01107
5.23028	1.19027	-11.5782		-5.35273						4.9665	-0.212573	3.44842		2.39268
3.5645	1.24891	-13.4525		-9.00078						-8.24745	-0.22299	3.36331		5.20241
6.23685	1.20216	-10.6306		-3.13289						2.59323	-0.224846	3.42035		2.83727
11.2262	1.20619	-11.9278		1.61316						-1.61262	-0.222805	3.46274		3.82204
6.87999	1.21403	-11.9203		-3.56782						-6.34188	-0.202827	3.49387		4.78017
14.4264	1.13755	-11.7084		4.70251						-5.35824	-0.217517	3.43826		4.60377
13.6968	1.27021	-11.016		6.38182						4.52497	-0.213343	3.41909		2.45372
17.5776	1.09145	-11.402		7.78314						-6.19155	-0.211514	3.36133		4.67093
8.4863	1.2641	-12.5094		-1.78187						5.08105	-0.213238	3.44128		2.35781
10.7895	1.19821	-10.8464		2.08174						-2.05609	-0.21618	3.41693		3.86141
6.83894	1.1965	-10.918		-2.73518						4.91195	-0.212188	3.44558		2.40332
2.29485	1.22557	-12.1847		-9.37226						9.01254	-0.210747	3.34153		1.44216
7.56684	1.20258	-12.7151		-3.6153						-10.7463	-0.219612	3.36024		5.72026
10.4267	1.20471	-11.3551		1.20594						-4.25663	-0.217806	3.39336		4.32048
4.9777	1.1697	-11.9873		-6.16484						0.201787	-0.218572	3.46811		3.42401
3.56811	1.20706	-11.4121		-7.10518						0.463905	-0.221397	3.48515		3.38244
6.34982	1.19726	-11.8823		-4.27999						0.209579	-0.214592	3.38569		3.34072
7.95485	1.19422	-11.4841		-1.98428						0.311807	-0.220957	3.44555		3.37665
7.71932	1.22488	-10.1668		-0.711559						-1.37097	-0.218634	3.3595		3.65924
5.08855	1.19723	-12.3556		-6.26349						3.39039	-0.209652	3.38606		2.67526
15.247	1.28117	-11.7257		7.80822						-9.3002	-0.21473	3.39735		5.39438
16.8177	1.14029	-11.9833		7.19384						-7.64657	-0.214998	3.39538		5.03938
14.7337	1.20787	-10.5135		7.28289						3.75865	-0.21033	3.39971		2.60915
12.8617	1.10642	-11.4551		2.77538						3.73136	-0.225371	3.4288		2.58786
11.8928	1.19526	-12.1269		2.08805						0.467488	-0.224151	3.42165		3.31686
5.7018	1.17767	-11.6008		-4.88594						-4.04625	-0.225758	3.42601		4.33948
6.77366	1.18274	-10.8352		-2.82368						2.68682	-0.212621	3.45472		2.88344
1.19453	1.20094	-11.342		-9.90742						-6.16243	-0.216369	3.38336		4.71672
14.4205	1.23119	-11.5693		6.18515						0.0740301	-0.213298	3.44342		3.42763
-0.266358	1.24379	-11.0405		-11.3718						-2.74365	-0.218137	3.3842		3.98269
15.6963	1.21497	-11.2729		7.79769						-2.76436	-0.226163	3.46789		4.09308
15.1833	1.16211	-10.6989		6.94577						-2.60679	-0.20987	3.42513		3.97221
11.0089	1.22388	-11.3304		2.14323						-2.09572	-0.213074	3.41913		3.86567
11.4111	1.25906	-11.3606		3.00679						1.378	-0.211937	3.43426		3.14221
14.7718	1.20333	-10.7607		7.01473						8.46743	-0.220498	3.48419		1.61714
9.00273	1.22818	-10.9127		0.144264						-6.11302	-0.219474	3.4093		4.75095
17.8144	1.17552	-11.2759		9.66526						0.831463	-0.209213	3.43822		3.26426
17.9513	1.22787	-12.4866		9.55528						3.39076	-0.210759	3.45353		2.7389
6.61768	1.21897	-11.239		-3.17225						-5.72912	-0.216211	3.38736		4.62606
6.83901	1.18741	-12.7478		-4.62705						-0.0643198	-0.213226	3.39262		3.40634
7.60736	1.18294	-10.9276		-1.92859						-4.15783	-0.225404	3.3517		4.28889
9.57032	1.14659	-12.8033		-1.83007						5.76939	-0.218381	3.40599		2.14607
0.25849	1.27107	-11.6449		-11.3163						2.89282	-0.205334	3.39123		2.79724
11.4882	1.21669	-11.455		2.52252						-0.725538	-0.213016	3.46412		3.61867
2.98493	1.18303	-11.1396		-7.60837						-14.8164	-0.222623	3.44121		6.73967
6.31958	1.13542	-11.4446		-4.26927						-5.85999	-0.223531	3.43426		4.74414
7.63734	1.23402	-11.5483		-2.12364						-1.46603	-0.21366	3.46213		3.77536
3.3979	1.17995	-10.7138		-6.70441						3.5707	-0.217927	3.46545		2.6873
13.5464	1.23688	-10.9583		5.79705						-2.67817	-0.219279	3.41182		3.99909
11.5421	1.23297	-12.8377		1.39337						-4.30525	-0.216959	3.43109		4.36515
8.71995	1.27594	-12.2838		-1.15772						1.52261	-0.221389	3.40363		3.06654
9.44379	1.21024	-12.0819		-0.65265						-3.69493	-0.223139	3.4217		4.24619
3.57666	1.15614	-12.9212		-8.78611						2.75535	-0.227997	3.49119		2.86298
9.82891	1.13123	-11.6278		-0.509045						2.65338	-0.222905	3.44857		2.85712
2.73315	1.14234	-13.1451		-10.0229						-5.74664	-0.218901	3.39565		4.65359
5.14652	1.24053	-12.8669		-6.48253						4.842	-0.225906	3.45895		2.36512
6.54546	1.19375	-11.4562		-3.64258						-7.31429	-0.211232	3.32186		4.86687
3.54155	1.18823	-11.8104		-7.60224						-9.27034	-0.216633	3.44755		5.45581
11.0173	1.17356	-11.3722		1.55726						-0.394297	-0.22872	3.40638		3.49656
10.9889	1.17873	-11.2671		1.68577						-1.21454	-0.227479	3.33977		3.61605
6.5541	1.22417	-11.8916		-3.86831						-0.974568	-0.21909	3.4026		3.61612
12.2902	1.19254	-11.6603		2.99627						-8.12641	-0.217188	3.44978		5.21474
7.80949	1.17749	-10.4419		-1.24633						-1.16029	-0.216036	3.45949		3.71015
5.45366	1.18908	-11.9624		-5.47755						-1.35786	-0.21471	3.4651		3.75665
16.3766	1.18882	-11.0606		8.40819						-4.69493	-0.216652	3.38352		4.40068
6.76267	1.2295	-11.2628		-2.94816						-0.810543	-0.21882	3.32287		3.50023
-0.172408	1.2253	-11.4089		-11.6202						3.06208	-0.217924	3.39927		2.73197
8.13637	1.13967	-10.3611		-1.08826						-4.96858	-0.215307	3.38383		4.4536
16.7442	1.18113	-12.1328		7.64412						4.58658	-0.215536	3.42259		2.43401
13.2907	1.2442	-11.6187		4.91761						-3.46183	-0.220149	3.45217		4.21429
0.597715	1.22481	-11.5131		-10.781						-0.851838	-0.220515	3.47768		3.66552
8.40089	1.22387	-11.0544		-0.772756						-3.5924	-0.211266	3.35229		4.11124
12.8557	1.20846	-9.73433		5.80133						-3.4096	-0.211787	3.40253		4.12464
11.4718	1.14834	-11.2785		1.89494						2.22797	-0.226587	3.38541		2.88058
5.15658	1.18262	-10.8726		-4.77428						-1.66476	-0.216669	3.41108		3.77178
11.8589	1.18244	-11.4506		2.57188						-3.81081	-0.21601	3.41348		4.23665
8.61434	1.1926	-9.86834		0.405126						-2.93373	-0.217974	3.40496		4.04444
9.12642	1.15769	-12.7528		-2.18721						1.56211	-0.218344	3.42945		3.08838
5.57942	1.18274	-12.1739		-5.57486						1.48228	-0.222464	3.4351		3.10535
13.4022	1.18507	-10.2964		5.58613						-4.48522	-0.225909	3.45735		4.47061
13.1172	1.20473	-11.139		4.66365						-0.726916	-0.227836	3.43205		3.59767
9.97071	1.23871	-10.507		1.84377						-10.8203	-0.221558	3.44433		5.84166
5.43547	1.24113	-13.3577		-6.61156						-0.715145	-0.222725	3.42712		3.5864
12.3545	1.17951	-12.6699		1.90235						-7.71689	-0.218471	3.46521		5.15113
9.22565	1.26598	-12.8176		-1.13811						1.52018	-0.208747	3.39197		3.07464
9.6962	1.17796	-12.1393		-0.717511						-5.00915	-0.208321	3.43135		4.47486
7.0952	1.19871	-10.8028		-2.29773						2.90339	-0.233989	3.40414		2.72477
10.2417	1.18267	-11.7385		0.374012						3.77476	-0.224343	3.41688		2.57004
11.6736	1.24376	-10.6091		3.91015						-1.93157	-0.214867	3.44965		3.86468
15.422	1.1894	-11.513		6.83						-0.648517	-0.213856	3.41198		3.55067
6.14456	1.15133	-11.2743		-4.19989						-3.11011	-0.213531	3.39324		4.05734
4.84572	1.17946	-11.2505		-5.53516						4.86748	-0.226336	3.44863		2.34695
15.0544	1.1991	-13.4417		4.6101						3.19895	-0.218651	3.4151		2.71564
14.8792	1.24993	-12.6917		5.90618						-2.91837	-0.222226	3.44381		4.09235
8.51053	1.20373	-12.0414		-1.79704						12.3038	-0.218753	3.31196		0.620472
9.75612	1.17154	-11.979		-0.54931						-5.31532	-0.23194	3.39819		4.63103
13.2083	1.16012	-11.4353		3.88782						-4.17323	-0.221655	3.48025		4.40526
4.49861	1.20151	-11.5508		-6.14567						-8.06474	-0.217598	3.36637		5.12124
6.79655	1.21667	-11.9718		-3.70265						3.72374	-0.223943	3.30547		2.47156
8.04005	1.1644	-10.6584		-1.29655						0.0131951	-0.223809	3.41586		3.41291
4.78536	1.17716	-11.5285		-5.89538						-5.63622	-0.217438	3.4738		4.69933
7.5388	1.1896	-10.9387		-1.97052						-6.83885	-0.21208	3.41209		4.86247
9.99133	1.1362	-11.7678		-0.415581						3.43682	-0.220332	3.43375		2.67651
1.01311	1.18659	-10.6321		-9.42992						-6.72424	-0.221329	3.40019		4.88846
8.36266	1.20072	-11.5214		-1.48019						1.62193	-0.206561	3.43673		3.1017
6.38793	1.21867	-11.7228		-3.93802						5.32425	-0.227249	3.33875		2.12882
1.75675	1.14334	-11.3916		-9.38307						-2.17835	-0.221569	3.37544		3.85809
7.11483	1.24459	-12.6206		-3.76557						-2.98686	-0.227479	3.44171		4.12116
9.99715	1.22198	-11.3577		0.858599						5.45213	-0.215194	3.38936		2.21609
4.28508	1.20519	-11.5821		-6.41781						-6.0023	-0.221773	3.42506		4.75621
3.75335	1.19437	-11.3297		-6.84684						1.31737	-0.216833	3.43953		3.15388
10.6788	1.20192	-11.9108		0.924341						-2.59591	-0.214582	3.36943		3.92647
7.56763	1.25855	-12.6932		-3.16897						3.91569	-0.217134	3.41555		2.56532
10.9828	1.17485	-11.353		1.55008						1.03026	-0.210091	3.40322		3.18677
12.8024	1.18051	-9.29424		5.81919						3.74237	-0.217496	3.4547		2.64075
6.72392	1.19156	-11.572		-3.56004						-4.50112	-0.219554	3.47141		4.45965
8.63642	1.19036	-10.4883		-0.207879						0.895656	-0.22097	3.40629		3.20838
2.2739	1.17316	-12.0053		-9.33766						1.28287	-0.215239	3.3953		3.11918
6.87576	1.13741	-10.9291		-3.10851						-3.39704	-0.222606	3.38256		4.13876
19.1483	1.20281	-12.0778		10.9539						4.00105	-0.215989	3.4449		2.58071
13.8513	1.16893	-11.1395		5.05163						-6.30767	-0.228747	3.38373		4.82659
13.3004	1.22426	-9.68623		6.59698						-3.51047	-0.221496	3.42881		4.20637
8.85217	1.18751	-11.6572		-1.1452						5.51896	-0.213611	3.40165		2.22274
10.9587	1.2045	-11.8803		1.31941						4.06069	-0.21142	3.44373		2.58521
9.65942	1.14438	-11.8667		-0.812702						-12.1765	-0.218171	3.41813		6.07469
9.90973	1.18088	-12.6023		-0.90009						1.08424	-0.22356	3.3911		3.14871
17.231	1.19176	-11.8162		8.71905						0.732268	-0.216367	3.43643		3.278
2.80897	1.13917	-11.9063		-8.7064						6.33877	-0.214108	3.40644		2.04926
8.30534	1.19084	-10.6497		-0.759426						-3.9246	-0.218624	3.36102		4.21903
10.053	1.19289	-11.8746		0.117543						-10.1003	-0.216028	3.39915		5.58109
7.04719	1.22564	-12.2067		-3.56945						-6.54872	-0.203872	3.43591		4.771
5.03884	1.25734	-12.3944		-6.05882						-1.44922	-0.208221	3.4367		3.73846
9.30425	1.16172	-10.9788		-0.16982						11.4491	-0.213566	3.41713		0.97199
17.7247	1.17546	-11.6408		9.19395						-0.0945307	-0.213677	3.43867		3.45887
6.57933	1.19551	-10.6649		-2.79928						-1.68266	-0.225754	3.39686		3.77673
5.5536	1.19691	-11.8612		-5.2141						-10.6115	-0.221635	3.41172		5.76359
5.57516	1.188	-11.1251		-4.5018						-1.06764	-0.217484	3.34893		3.58112
12.1593	1.10614	-12.5411		0.908848						7.46532	-0.219171	3.38565		1.74946
4.61952	1.2387	-11.3286		-5.60637						-2.60171	-0.220723	3.47696		4.05122
2.83077	1.22114	-12.861		-9.40424						6.15712	-0.216293	3.43004		2.0983
8.48073	1.17657	-11.9078		-1.92966						2.77599	-0.209264	3.4698		2.88888
5.21672	1.19881	-11.3558		-5.10191						-1.28216	-0.204299	3.5052		3.76714
0.184179	1.20433	-12.2038		-11.982						1.00651	-0.221428	3.44853		3.22566
11.743	1.18586	-11.7393		2.18615						-8.06107	-0.209194	3.40883		5.09516
13.2006	1.18097	-13.3564		2.23315						6.48029	-0.208147	3.39282		2.04397
11.4955	1.17672	-12.3678		1.15914						9.0386	-0.224885	3.41684		1.3842
13.5951	1.20643	-11.9308		4.47069						1.28791	-0.225832	3.42282		3.13197
8.19663	1.19379	-11.5087		-1.7236						0.650457	-0.20861	3.38435		3.24866
7.39963	1.18932	-10.4439		-1.6434						-2.54678	-0.226481	3.37497		3.95177
22.4031	1.25083	-10.4116		17.6109						0.0461904	-0.216223	3.43104		3.42105
2.665	1.17311	-12.0787		-8.95232						-3.82626	-0.215386	3.42843		4.25255
8.22699	1.22052	-12.0872		-2.04604						3.1833	-0.215647	3.46192		2.77545
2.37196	1.26228	-11.2929		-8.29881						-4.28759	-0.221798	3.4678		4.41878
6.8054	1.18575	-10.6547		-2.58522						-0.856985	-0.212788	3.40538		3.58774
18.6465	1.22459	-10.9898		11.8445						-6.26357	-0.215922	3.47003		4.82248
1.20666	1.22158	-12.2592		-10.7852						5.51708	-0.217274	3.36703		2.16831
11.5289	1.21819	-11.5726		2.47173						0.541111	-0.212449	3.43754		3.32258
2.72379	1.1606	-11.4724		-8.31112						12.3956	-0.222079	3.37474		0.621945
14.1773	1.23252	-13.4701		4.00361						-1.68225	-0.22171	3.44421		3.81719
10.9052	1.20704	-10.539		2.624						-3.83087	-0.217232	3.3852		4.21738
-3.18815	1.19	-12.325		-16.1188						-7.55451	-0.203645	3.40538		4.94382
19.5696	1.21097	-11.5942		12.1039						0.888104	-0.225363	3.42094		3.22079
10.5687	1.2052	-11.5845		1.15299						2.19514	-0.227335	3.45274		2.9537
8.20332	1.26105	-11.0465		-0.701728						-2.18509	-0.220597	3.37238		3.85441
9.99484	1.14492	-10.2836		1.15969						8.31577	-0.226684	3.38211		1.49706
11.8325	1.23244	-11.1199		3.46302						-2.67472	-0.220866	3.36736		3.95811
9.46664	1.20334	-10.9286		0.462961						-2.81842	-0.208322	3.46311		4.05025
9.72771	1.2307	-12.0988		-0.126939						-1.66281	-0.216993	3.44704		3.80786
10.6252	1.23694	-11.7138		1.42903						-7.26683	-0.216413	3.45678		5.02942
2.04751	1.20303	-12.0196		-9.5564						8.55027	-0.219495	3.45629		1.57956
9.15469	1.20456	-11.2138		-0.186437						2.3557	-0.218522	3.43693		2.92215
2.52032	1.2289	-12.1045		-9.00732						-4.77041	-0.218798	3.466		4.50976
11.9088	1.27493	-11.6974		3.48544						2.60821	-0.2175	3.46031		2.89302
12.3058	1.22909	-11.5773		3.54764						1.44447	-0.21323	3.39083		3.08283
7.67884	1.19456	-12.095		-2.92216						10.577	-0.224452	3.35741		0.983372
14.2001	1.19456	-12.0875		4.87539						-5.46273	-0.218184	3.38904		4.58092
7.44035	1.27708	-10.7449		-1.24298						11.0055	-0.209964	3.46191		1.15116
4.62905	1.22329	-10.9601		-5.29747						-4.74988	-0.21768	3.43001		4.46397
11.7472	1.2222	-11.2877		3.06977						-3.72937	-0.218481	3.42043		4.23522
20.0879	1.19277	-11.2716		12.6886						-8.41111	-0.224053	3.38445		5.26898
15.3707	1.13829	-11.6374		5.85888						9.20228	-0.216674	3.41791		1.42402
0.558384	1.18742	-11.4471		-10.7841						-14.3065	-0.214667	3.39489		6.46602
2.22073	1.20163	-11.5705		-8.90202						5.26566	-0.21521	3.40568		2.27246
9.8768	1.14322	-12.5306		-1.23924						1.89647	-0.20697	3.39689		3.00438
13.6327	1.16742	-12.1011		3.81398						1.86846	-0.2244	3.38804		2.96876
12.6485	1.2605	-11.5266		4.41683						-2.03122	-0.220462	3.48599		3.9338
9.58643	1.24776	-11.261		0.700561						6.31104	-0.218528	3.39967		2.02053
9.86509	1.19528	-12.2662		-0.474644						-1.39885	-0.222563	3.37278		3.68411
8.12648	1.20409	-11.0771		-1.292						1.96909	-0.228937	3.3285		2.8777
5.79274	1.15367	-11.9272		-5.24429						-2.16268	-0.215463	3.38237		3.84835
8.05322	1.24977	-12.3823		-2.3177						9.76229	-0.221799	3.48301		1.31774
9.14798	1.2114	-12.2228		-1.14092						-2.54479	-0.216584	3.39873		3.94989
5.38032	1.20697	-11.2673		-4.77344						-1.23322	-0.2142	3.49012		3.75428
11.988	1.24188	-11.7114		3.17632						-0.554984	-0.222455	3.43236		3.55582
9.41275	1.23372	-10.8038		0.808978						-4.70693	-0.239196	3.43709		4.56297
14.6519	1.16602	-11.9753		5.10904						1.23573	-0.216135	3.45976		3.19268
12.8387	1.17781	-11.6036		3.51793						7.00595	-0.218606	3.37375		1.84221
1.10498	1.312	-11.346		-9.89622						-5.18713	-0.217897	3.42007		4.55033
16.3127	1.24675	-11.5509		8.78696						6.42683	-0.221513	3.432		2.00837
5.91206	1.19295	-12.8694		-5.81656						1.15141	-0.212191	3.42527		3.18095
5.86801	1.20059	-12.4129		-5.36783						4.7955	-0.229141	3.48492		2.38607
11.2661	1.18064	-10.8585		2.44278						-6.52712	-0.216993	3.4136		4.82994
8.68744	1.18467	-10.4951		-0.203414						-0.227461	-0.223424	3.34469		3.39551
16.3655	1.1462	-10.2927		8.4655						-5.4104	-0.209211	3.4567		4.58861
15.7786	1.17416	-12.7067		5.81997						-2.57167	-0.214529	3.47277		4.02447
2.64686	1.19015	-11.6336		-8.4834						-3.5617	-0.21336	3.44388		4.2038
7.10197	1.22941	-11.6299		-2.89864						2.1608	-0.219337	3.45406		2.98012
11.0069	1.21437	-11.7837		1.58269						-2.82909	-0.227047	3.43635		4.07868
10.2197	1.14032	-10.2261		1.42769						-4.0452	-0.21172	3.46005		4.3165
11.8247	1.25973	-11.1576		3.73841						-6.63557	-0.218208	3.36381		4.81175
-1.25246	1.24368	-10.494		-12.0516						-5.94078	-0.211592	3.41858		4.6756
9.70959	1.2152	-10.5053		1.29378						5.69286	-0.226621	3.50082		2.2107
11.1632	1.22598	-11.2616		2.42424						2.29923	-0.219649	3.47119		2.96616
7.61855	1.20011	-11.8598		-2.71669						-5.84362	-0.212237	3.44504		4.68528
6.64436	1.22952	-12.1277		-3.95837						1.69307	-0.226095	3.48282		3.10002
7.73548	1.24494	-12.132		-2.50182						15.6982	-0.220967	3.42048		-0.0483027
15.8359	1.22072	-11.6453		7.68601						-13.278	-0.222502	3.40052		6.3549
9.26556	1.15003	-11.1849		-0.529268						2.11212	-0.213399	3.44996		2.99924
7.17636	1.19382	-11.0971		-2.52978						-3.22206	-0.214678	3.45831		4.15002
17.4886	1.22143	-12.3429		9.01823						2.13743	-0.216053	3.42649		2.96469
11.827	1.19433	-11.03		3.09522						3.17807	-0.21823	3.40388		2.71033
12.9417	1.20584	-11.1279		4.47777						3.08652	-0.213848	3.45839		2.79834
11.4471	1.20254	-11.8489		1.91672						-2.6781	-0.216835	3.34105		3.92176
12.8593	1.19661	-11.5769		3.81062						3.45099	-0.217624	3.43015		2.67913
7.17623	1.20619	-9.93336		-1.27745						4.23147	-0.219189	3.41399		2.4865
1.24657	1.25375	-9.82262		-8.25973						2.56439	-0.221337	3.42744		2.85985
10.443	1.21923	-12.8091		-0.0766871						8.21814	-0.219258	3.44647		1.64458
9.38428	1.25909	-10.9272		0.888461						6.56823	-0.21277	3.44613		2.04861
-0.153795	1.11776	-11.3134		-11.4853						-5.46082	-0.209053	3.38938		4.53098
10.8012	1.24579	-11.1951		2.26089						-12.3362	-0.227098	3.50865		6.31016
11.17	1.21649	-11.0669		2.52129						-9.60843	-0.2214	3.44155		5.56886
3.28011	1.15742	-10.5473		-6.75088						-8.53806	-0.216934	3.44807		5.30027
17.9095	1.1938	-10.8415		10.5387						-10.2927	-0.224318	3.40995		5.71878
0.783223	1.19368	-11.4709		-10.536						-6.98182	-0.208958	3.42473		4.88364
2.00042	1.12249	-11.7843		-9.53884						-5.21409	-0.217387	3.39249		4.52597
7.8761	1.19661	-11.3444		-1.91978						7.80191	-0.224683	3.37186		1.61891
6.15055	1.22615	-9.09202		-1.5505						8.30128	-0.216957	3.46567		1.66465
8.90953	1.25858	-11.8714		-0.658055						1.62419	-0.216451	3.43533		3.08378
6.43376	1.20236	-11.2678		-3.53205						-1.62487	-0.205376	3.43055		3.76425
9.50717	1.19506	-11.6447		-0.28303						-5.72436	-0.219504	3.50227		4.75879
7.70737	1.20512	-12.4982		-3.2099						0.471066	-0.215183	3.3882		3.28683
-0.965708	1.19442	-10.052		-11.2055						3.86161	-0.220434	3.47512		2.62389
10.6151	1.20722	-12.94		-0.125174						-6.32456	-0.22684	3.41834		4.853
14.2786	1.20504	-12.7826		4.42367						10.3216	-0.21716	3.48544		1.24399
19.0884	1.17601	-11.5414		10.9066						1.99717	-0.207219	3.45313		3.03928
4.21575	1.26191	-13.1051		-7.78523						1.82833	-0.225677	3.41112		2.99851
16.2554	1.19519	-12.1514		7.27697						-2.89802	-0.209868	3.44492		4.05312
11.5614	1.21538	-12.7778		1.27366						-3.25397	-0.212734	3.4709		4.16314
15.1132	1.23847	-11.625		7.09222						-7.21611	-0.22429	3.3684		4.9869
8.807	1.21561	-12.4906		-1.78473						5.70829	-0.214951	3.42471		2.19771
6.23864	1.19038	-10.3374		-2.91107						-1.1692	-0.216411	3.41072		3.66375
3.37771	1.23346	-12.9041		-8.73786						-0.275673	-0.218331	3.39455		3.45474
8.76609	1.23617	-11.462		-0.625661						-2.71472	-0.211415	3.39002		3.96395
7.22638	1.18418	-10.8985		-2.34117						14.9324	-0.220194	3.41338		0.125361
9.95285	1.15669	-10.8123		0.700006						9.91714	-0.221785	3.43144		1.23197
11.5975	1.23039	-10.081		4.18842						-3.6498	-0.214382	3.39653		4.17898
4.19045	1.23257	-12.0385		-6.8735						-1.03868	-0.229324	3.41159		3.64978
8.82171	1.14185	-11.0777		-1.00464						-1.74276	-0.212774	3.51669		3.8875
6.92125	1.18478	-11.4898		-3.28959						0.368716	-0.219378	3.43046		3.34957
3.66426	1.16365	-12.2223		-7.95835						-6.88611	-0.207168	3.40762		4.8342
6.08754	1.24634	-11.9316		-4.34441						-8.04489	-0.222819	3.42303		5.21558
10.7703	1.23546	-11.8566		1.44964						8.80607	-0.217576	3.44638		1.53039
11.4014	1.23233	-11.4176		2.63283						-7.58675	-0.217396	3.39567		5.045
13.7215	1.16141	-11.3073		4.62894						-3.5341	-0.222432	3.41896		4.20505
0.475512	1.22368	-10.2122		-9.63034						1.97204	-0.218355	3.40305		2.97244
5.67698	1.21478	-11.8702		-4.97388						1.7162	-0.21893	3.44316		3.06744
8.54129	1.12366	-10.2296		-0.632043						-4.19015	-0.218668	3.49779		4.41404
9.2344	1.18234	-10.9757		-0.0574729						1.62001	-0.228001	3.48991		3.12055
13.2889	1.184	-11.5535		4.18062						7.99031	-0.21345	3.43794		1.7324
5.53465	1.16541	-12.1422		-5.69202						-4.33329	-0.214095	3.44079		4.36853
11.8959	1.20923	-11.7183		2.66653						4.12876	-0.215464	3.41589		2.52629
12.1728	1.22749	-10.7201		4.22188						1.64445	-0.217516	3.48189		3.1242
13.4667	1.22964	-12.992		3.56717						1.01055	-0.216656	3.44648		3.22754
7.84866	1.22657	-10.0151		-0.388187						2.77331	-0.213754	3.42982		2.83701
5.27999	1.28836	-13.6197		-6.81724						-8.44299	-0.22272	3.47569		5.35612
9.53691	1.11509	-11.0721		-0.437591						3.22636	-0.219642	3.46623		2.75758
3.47075	1.1682	-11.4874		-7.43289						4.16781	-0.217562	3.39324		2.48648
5.83854	1.17407	-10.8765		-4.0216						3.6887	-0.223591	3.40637		2.58161
7.8473	1.1805	-11.8245		-2.5608						-4.6555	-0.220262	3.33391		4.35934
6.51683	1.23183	-11.6041		-3.57652						-3.77635	-0.223211	3.36188		4.20481
7.45598	1.22972	-9.90278		-0.73398						-0.761134	-0.217305	3.43132		3.59672
11.4364	1.19356	-10.581		3.06905						0.769427	-0.217446	3.40662		3.23931
8.77286	1.24558	-9.52631		1.40098						-4.91126	-0.21611	3.32742		4.38879
5.33102	1.16917	-11.5116		-5.27873						-0.857616	-0.213687	3.45363		3.63689
16.7313	1.16456	-10.6884		8.79621						-10.3475	-0.211572	3.42237		5.61162
6.27825	1.19107	-11.8939		-4.41612						2.00826	-0.219267	3.41147		2.97113
7.74152	1.21194	-10.9771		-1.59483						-3.51319	-0.223477	3.4024		4.18752
7.89928	1.28211	-12.065		-1.93729						-5.2296	-0.21446	3.42094		4.54248
16.9542	1.2039	-11.8341		8.57701						-10.5695	-0.217739	3.36804		5.66944
9.57272	1.2435	-11.415		0.488667						-0.983414	-0.215163	3.425		3.63659
7.61073	1.23372	-11.4293		-2.03978						-6.53988	-0.215918	3.3521		4.76418
9.0732	1.23294	-12.5789		-1.39223						-0.88098	-0.208569	3.47076		3.6545
9.54974	1.15904	-12.3866		-1.31804						3.30388	-0.216757	3.44135		2.72521
6.1234	1.19432	-11.879		-4.56566						-0.43633	-0.21745	3.44083		3.53571
9.95565	1.24004	-12.0838		0.26156						3.27707	-0.230265	3.42107		2.66648
10.8055	1.2077	-12.6481		0.401644						13.1654	-0.223851	3.45054		0.503444
0.444674	1.20001	-11.7507		-11.217						1.88142	-0.217628	3.3765		2.96705
6.20112	1.16034	-12.1916		-4.99623						-3.14295	-0.225163	3.42685		4.13452
4.45013	1.15423	-12.1498		-7.01334						-1.50453	-0.215309	3.38473		3.70866
13.8036	1.19447	-11.1896		5.29843						-5.41427	-0.222509	3.44056		4.64528
5.78373	1.22527	-13.6398		-6.55322						-9.30181	-0.220701	3.308		5.36092
11.7808	1.17844	-11.3887		2.49425						3.42352	-0.221198	3.34133		2.58405
14.0059	1.178	-11.2877		5.21114						-7.17615	-0.222542	3.44761		5.04461
10.7435	1.21513	-12.1404		0.914358						-3.77858	-0.221881	3.35878		4.19718
9.09836	1.25398	-11.4588		-0.0496214						-8.17516	-0.214803	3.44902		5.20506
8.21022	1.1484	-12.2486		-2.81992						2.91459	-0.212825	3.43746		2.81716
4.78371	1.21622	-11.6474		-5.82938						-2.97583	-0.22516	3.37061		4.04065
7.18465	1.18639	-11.0109		-2.48714						0.240841	-0.218988	3.39737		3.34463
8.3605	1.18987	-10.6177		-0.66976						-1.70382	-0.214465	3.37378		3.73919
1.21196	1.17861	-12.3633		-10.9349						-6.30366	-0.223995	3.38507		4.79706
5.45055	1.15829	-11.4376		-5.12427						-2.99324	-0.214067	3.41656		4.05731
12.5944	1.20321	-11.8128		3.34085						-7.99939	-0.206541	3.4102		5.0624
4.43939	1.16423	-11.346		-6.17754						1.57531	-0.211131	3.42678		3.09418
3.78629	1.19023	-13.2526		-8.74603						5.41026	-0.212952	3.41078		2.25866
4.55424	1.11237	-11.604		-6.53803						0.838847	-0.216375	3.33325		3.15174
8.20323	1.15796	-11.0017		-1.50268						3.16164	-0.217952	3.5002		2.81112
21.553	1.19245	-12.4633		13.2376						4.03019	-0.218129	3.37227		2.49317
8.19781	1.26561	-11.7272		-1.352						-13.5897	-0.22014	3.47861		6.47023
8.19739	1.17649	-13.0822		-3.43803						0.177695	-0.213102	3.39733		3.35947
14.7147	1.18949	-11.595		5.90795						-1.41929	-0.217645	3.3842		3.6931
3.10486	1.18528	-11.1203		-7.44013						-0.187501	-0.219852	3.44198		3.4832
12.6085	1.17631	-12.9926		1.83895						-4.60446	-0.219477	3.44169		4.45227
11.2267	1.17711	-11.4715		1.7436						-8.69596	-0.21917	3.38938		5.29527
9.85233	1.28185	-10.3051		2.3241						6.01774	-0.204916	3.41158		2.17845
5.04776	1.18386	-11.4071		-5.43124						-3.8319	-0.218314	3.45953		4.29608
13.3243	1.18081	-11.872		3.86155						1.93174	-0.225891	3.40058		2.96422
7.00111	1.15801	-11.0754		-2.96798						5.72866	-0.22826	3.34679		2.03917
6.42394	1.27611	-11.1969		-2.99922						-5.6468	-0.216006	3.44903		4.66878
14.6411	1.26694	-10.9294		7.61993						-2.61485	-0.217977	3.462		4.03198
10.6341	1.22257	-10.9555		2.04543						-0.473579	-0.215327	3.27644		3.37841
3.79059	1.15936	-10.645		-6.25034						-10.8287	-0.206547	3.46184		5.69848
3.80108	1.21478	-13.1909		-8.57339						3.71587	-0.218715	3.4272		2.61448
4.92621	1.17914	-10.6463		-4.83757						-4.09391	-0.223575	3.46333		4.37863
7.1305	1.17153	-10.349		-1.99543						-0.338869	-0.215339	3.3558		3.42877
8.33364	1.22262	-11.5007		-1.31183						6.99944	-0.212548	3.44639		1.95868
7.09924	1.15177	-10.9467		-2.77005						-4.33525	-0.218006	3.45192		4.39703
6.95177	1.21084	-10.0975		-1.67999						-3.09808	-0.223067	3.457		4.14808
11.1541	1.1734	-11.9968		1.09143						-6.3185	-0.223842	3.43405		4.8484
7.77517	1.15847	-13.1111		-4.10387						-2.57204	-0.221813	3.40008		3.97059
11.5228	1.20952	-10.7685		3.16857						-7.37177	-0.213496	3.3725		4.94635
5.58059	1.20304	-12.6193		-5.9056						0.265677	-0.220215	3.43271		3.3742
-0.594315	1.21051	-10.2733		-10.9927						-0.460948	-0.219166	3.32496		3.42598
11.754	1.25146	-11.6109		3.09871						-1.4753	-0.21021	3.4091		3.71923
10.4298	1.16161	-12.0842		0.0311066						-5.1028	-0.212704	3.47248		4.55786
4.47978	1.15995	-11.6847		-6.48835						4.33165	-0.206726	3.42918		2.53371
3.16727	1.20369	-12.4009		-8.58853						1.5457	-0.222155	3.43033		3.08695
8.06422	1.1212	-12.1704		-3.12885						-2.55306	-0.219279	3.49506		4.0549
11.8051	1.26045	-10.6044		4.27532						-4.24822	-0.211197	3.41576		4.31297
5.9062	1.20077	-10.7891		-3.69709						-2.46638	-0.21281	3.43375		3.95862
15.9107	1.16358	-12.1553		6.35803						-0.358356	-0.227034	3.49712		3.57848
7.41697	1.23667	-11.2677		-2.09539						1.88168	-0.2107	3.348		2.95153
13.0913	1.19804	-10.2433		5.44073						2.41494	-0.217153	3.36544		2.84103
7.42031	1.15298	-12.2496		-3.69408						-1.10385	-0.224179	3.34584		3.5933
11.3012	1.16685	-9.61506		3.57178						-8.68361	-0.211874	3.39397		5.2338
5.02851	1.22498	-12.6825		-6.52268						0.892178	-0.219326	3.48351		3.28784
14.5012	1.1909	-11.5164		5.75311						1.03195	-0.213395	3.4367		3.21649
10.5767	1.17088	-10.9028		1.48131						1.00651	-0.227614	3.43497		3.20588
6.93023	1.20751	-10.2912		-1.9229						-0.0733328	-0.217689	3.35197		3.36793
6.98312	1.21303	-11.4278		-2.95709						2.63598	-0.207607	3.41008		2.86283
12.3428	1.1889	-11.5282		3.14607						3.85377	-0.216844	3.37892		2.54326
6.43828	1.15009	-11.7625		-4.35791						-7.23344	-0.210241	3.41491		4.93567
12.5889	1.15259	-12.7276		1.78218						13.4442	-0.212899	3.39678		0.534527
7.87373	1.2342	-10.3735		-0.655744						10.4567	-0.220905	3.43843		1.1285
6.09003	1.19028	-11.899		-4.6502						-4.07694	-0.219154	3.41043		4.30391
11.165	1.23719	-12.1793		1.63398						-5.35898	-0.217847	3.43551		4.60295
4.39463	1.1596	-11.2663		-6.17028						-3.40016	-0.206249	3.44155		4.14283
2.73287	1.29044	-11.7635		-8.23694						2.90286	-0.21476	3.47443		2.85101
8.25571	1.20635	-10.5836		-0.624265						-1.80554	-0.223049	3.37729		3.78001
11.6151	1.22455	-9.90966		4.31365						-3.50321	-0.213915	3.44553		4.19492
7.567	1.18298	-12.1454		-3.19384						7.45917	-0.227218	3.38522		1.69036
9.53501	1.20317	-11.5843		-0.11209						-0.378886	-0.212698	3.43475		3.51534
5.12243	1.16999	-12.1237		-6.13054						-8.23318	-0.218877	3.45954		5.26159
6.34525	1.21947	-11.0997		-3.36182						5.85162	-0.220797	3.46006		2.16804
0.784545	1.18177	-11.4828		-10.5556						0.766334	-0.212643	3.33466		3.17171
-3.01085	1.19779	-10.9417		-14.5481						5.09432	-0.222663	3.46596		2.33164
11.9491	1.19718	-12.4219		1.88333						1.66578	-0.20591	3.40248		3.05948
4.00097	1.21495	-11.428		-6.56698						-5.69873	-0.217125	3.42063		4.65797
-3.19317	1.22222	-10.9325		-14.8353						-0.811096	-0.220213	3.41962		3.59823
3.73009	1.25956	-11.9583		-7.26003						-4.00453	-0.214768	3.41973		4.27977
15.8018	1.1968	-10.8602		8.05132						2.41417	-0.218957	3.45958		2.93098
7.42467	1.18716	-10.4863		-1.67204						7.24976	-0.220039	3.33952		1.7443
5.8468	1.19828	-11.4043		-4.39817						1.30782	-0.210185	3.49042		3.21554
2.82223	1.18703	-11.9135		-8.56347						-2.13403	-0.22478	3.4527		3.93239
10.3192	1.17784	-11.5322		0.622178						4.38016	-0.217778	3.46188		2.50798
8.83306	1.2159	-11.5713		-0.83119						-5.20119	-0.2139	3.37245		4.48499
15.4142	1.25974	-12.725		6.69286						2.31434	-0.213189	3.38382		2.89043
15.4772	1.20455	-12.9656		5.67739						12.0469	-0.208979	3.43874		0.921181
9.57162	1.20021	-9.92581		1.56213						0.562423	-0.218612	3.39273		3.26978
7.56718	1.17797	-12.9355		-4.02154						8.17867	-0.22262	3.40976		1.58903
12.1744	1.23381	-11.4704		3.55047						3.80166	-0.224444	3.36395		2.51069
8.249	1.21842	-11.0619		-1.0111						1.58836	-0.221094	3.43835		3.08717
3.3137	1.22214	-11.5572		-7.50735						12.884	-0.207299	3.40902		0.738186
1.71696	1.18503	-12.4246		-10.3899						-0.451887	-0.21809	3.38148		3.48004
4.01462	1.17818	-11.8198		-7.08988						-3.04791	-0.227573	3.4932		4.18682
17.7781	1.19521	-11.7805		9.46798						1.07828	-0.221557	3.43555		3.19665
4.16885	1.27522	-12.0414		-6.72516						-11.044	-0.215936	3.46424		5.84903
7.74863	1.22436	-11.1895		-1.70238						3.67444	-0.216637	3.44849		2.65247
7.0637	1.12984	-11.185		-3.20413						1.27393	-0.217883	3.43218		3.15462
8.45415	1.16455	-12.0968		-2.25151						6.16611	-0.214722	3.43362		2.10962
10.095	1.24654	-12.0866		0.49718						-10.9184	-0.217275	3.38389		5.7562
2.85474	1.21547	-11.299		-7.82915						-0.0743995	-0.21283	3.46029		3.47613
7.11837	1.22467	-11.6393		-2.92166						-1.23681	-0.217232	3.45082		3.71949
9.7433	1.22268	-11.1139		0.799043						-2.39321	-0.209905	3.40639		3.90874
4.19488	1.16879	-10.4658		-5.56291						-8.56982	-0.218887	3.41408		5.28991
9.59161	1.14486	-10.6676		0.313452						3.32135	-0.212027	3.36865		2.66444
3.98975	1.23574	-12.3078		-7.37749						0.792111	-0.212181	3.44485		3.27678
10.9275	1.15734	-11.4751		1.17167						-1.62969	-0.210011	3.38537		3.72762
9.33344	1.22808	-11.8138		-0.351658						-7.85944	-0.22498	3.38085		5.14906
3.23354	1.24092	-10.5326		-6.52003						4.98942	-0.216034	3.37795		2.30006
9.14316	1.14501	-10.9764		-0.507365						3.6053	-0.22216	3.41987		2.61892
12.0514	1.17403	-12.1999		1.94891						-8.77913	-0.220695	3.41297		5.35047
10.5172	1.14046	-11.8212		0.173193						3.49778	-0.224277	3.4506		2.66613
14.1771	1.1999	-12.4209		4.59018						-4.2146	-0.214208	3.38559		4.28839
13.912	1.23409	-12.0011		5.16757						-10.227	-0.226257	3.44801		5.76194
5.88298	1.18047	-11.0335		-4.08878						-5.15326	-0.209588	3.3978		4.47786
3.71581	1.23167	-10.6599		-6.08326						-1.48951	-0.21429	3.40389		3.72307
11.6536	1.20104	-11.6447		2.35169						-1.13172	-0.217901	3.48086		3.72746
14.5899	1.17942	-11.1824		6.02536						-6.21626	-0.217578	3.44314		4.79566
10.3177	1.19316	-13.1699		-0.859211						-6.69887	-0.207907	3.44922		4.84196
10.2933	1.16034	-11.7879		0.155825						-4.98967	-0.207206	3.34561		4.3795
10.336	1.17691	-9.42059		2.74401						-4.10873	-0.216476	3.47348		4.36292
14.885	1.19597	-11.209		6.59303						4.50621	-0.215788	3.35279		2.3804
6.84259	1.17565	-11.4902		-3.44571						3.06472	-0.217332	3.40904		2.74298
11.5858	1.14196	-10.9432		2.28728						-5.00663	-0.219146	3.46093		4.55811
14.3267	1.24266	-11.0739		6.72924						-4.39672	-0.216403	3.33535		4.28681
12.5015	1.17319	-10.8768		3.78987						-10.0437	-0.217456	3.38119		5.56525
7.95076	1.16603	-12.1494		-2.87858						-0.112966	-0.219399	3.41518		3.43997
8.35698	1.19819	-11.8785		-1.86524						-2.67327	-0.216319	3.38244		3.96072
4.79723	1.19249	-11.4014		-5.68068						0.39597	-0.218484	3.40194		3.31543
13.8325	1.23392	-13.4329		3.63537						-4.67918	-0.21927	3.39618		4.42218
25.0008	1.17697	-11.2964		18.1288						-1.83938	-0.219909	3.48052		3.88501
12.8407	1.23986	-10.9039		5.01675						-4.17783	-0.206736	3.44461		4.30831
8.99542	1.1697	-11.2332		-0.711255						10.3104	-0.211886	3.41483		1.2302
8.1474	1.16434	-11.5129		-2.02652						-1.96598	-0.218928	3.46323		3.89364
4.90018	1.18988	-11.1807		-5.35006						-10.4805	-0.209596	3.49755		5.69421
10.334	1.2095	-10.8886		1.61031						12.8095	-0.216863	3.44917		0.671266
9.39763	1.24754	-12.3124		-0.588475						-10.908	-0.221256	3.41507		5.82852
9.7569	1.23366	-10.3434		1.69334						2.74075	-0.217868	3.33791		2.74079
1.42182	1.24047	-12.3321		-10.5684						-0.263045	-0.221251	3.46915		3.52734
8.16697	1.19635	-10.6775		-0.906923						7.94141	-0.224649	3.36907		1.58504
13.8063	1.15738	-11.4178		4.56134						-3.3738	-0.216108	3.49582		4.22492
-1.29725	1.27147	-11.6461		-13.2955						2.93254	-0.219522	3.38263		2.73888
11.6206	1.24078	-11.0624		3.35625						1.07946	-0.222131	3.40796		3.16818
16.157	1.2191	-10.708		8.98893						-3.71036	-0.210254	3.39304		4.17316
10.2904	1.23827	-10.5715		2.17084						10.564	-0.219569	3.40922		1.08969
14.5941	1.14688	-12.2058		4.532						-6.83616	-0.206897	3.4222		4.83658
1.81684	1.15059	-10.9907		-8.90023						4.29826	-0.213611	3.45282		2.53467
13.8327	1.18367	-12.711		3.66236						3.33982	-0.221543	3.48249		2.74258
12.7431	1.14505	-11.5071		3.08442						-0.23274	-0.221086	3.40911		3.46056
11.3362	1.19567	-11.0718		2.48255						-6.85702	-0.22296	3.32241		4.85125
18.5465	1.17194	-12.3262		9.40914						2.32708	-0.215076	3.37012		2.86962
9.64982	1.22895	-11.8243		0.034786						4.56162	-0.222587	3.46363		2.44827
9.83803	1.22964	-11.5899		0.507384						8.80125	-0.225629	3.45331		1.46749
6.23133	1.15374	-10.3481		-3.15873						-2.33201	-0.224616	3.35555		3.87936
11.2875	1.20301	-11.3104		2.26859						8.47203	-0.213012	3.42462		1.61998
8.3536	1.17917	-12.1073		-2.257						-2.36035	-0.219172	3.37849		3.89582
3.01696	1.22917	-10.1712		-6.46287						-4.36542	-0.224307	3.45955		4.43874
7.41385	1.21059	-11.3464		-2.37123						6.60493	-0.230077	3.36996		1.85031
11.4586	1.23423	-11.4622		2.68035						3.2841	-0.221693	3.39983		2.67177
5.23003	1.32065	-10.3203		-3.41331						-8.2225	-0.224803	3.47368		5.32212
15.0949	1.15722	-10.7884		6.67972						-2.33655	-0.214304	3.42391		3.92464
14.8437	1.19054	-10.8005		6.87156						1.99781	-0.207112	3.41562		3.00185
12.4826	1.2149	-12.1114		3.05375						3.44567	-0.219839	3.37688		2.61939
11.2061	1.22997	-11.8265		1.95668						-2.84652	-0.208089	3.46748		4.05981
11.3809	1.22279	-12.4632		1.45325						5.70547	-0.219966	3.50887		2.25386
9.16961	1.20067	-11.0648		-0.0551243						-3.02534	-0.210555	3.42983		4.06683
9.90068	1.25646	-10.9865		1.4533						4.7855	-0.222688	3.43991		2.37423
13.6597	1.24184	-12.4369		4.52626						-9.97716	-0.21037	3.32384		5.42274
2.56712	1.29659	-11.1838		-7.8553						-6.03861	-0.21866	3.43909		4.75949
7.63171	1.25371	-12.9557		-3.38773						-12.3865	-0.224799	3.43287		6.21734
6.49156	1.11911	-11.6651		-4.40028						3.36403	-0.223057	3.42771		2.67733
13.4632	1.28162	-12.2427		5.01206						-6.22482	-0.217295	3.40126		4.75389
19.016	1.20722	-12.7099		10.2465						-7.97749	-0.203443	3.37986		5.00282
11.125	1.19041	-10.5205		2.72279						-4.18538	-0.22271	3.47644		4.40857
6.63403	1.14529	-11.0958		-3.49788						-3.07881	-0.219946	3.50174		4.17891
11.0404	1.15405	-12.892		-0.15083						-7.25446	-0.21418	3.38443		4.93819
8.66725	1.19888	-11.9857		-1.59472						-0.173562	-0.218907	3.39246		3.43045
14.0071	1.19542	-10.3043		6.4401						-4.4473	-0.214628	3.36731		4.32183
8.84921	1.2017	-12.6573		-2.0232						1.78105	-0.221272	3.47369		3.0796
8.37178	1.21791	-10.5376		-0.341595						0.303695	-0.212068	3.46551		3.40111
8.79862	1.21191	-12.8432		-2.18006						-8.36964	-0.222117	3.39381		5.25285
14.5524	1.30358	-12.6988		6.27137						1.39649	-0.220178	3.44437		3.1369
5.45253	1.22463	-12.4339		-5.75656						-11.0697	-0.214367	3.41898		5.79195
5.75391	1.20903	-12.4352		-5.4786						-7.57188	-0.218169	3.4469		5.09885
16.6016	1.2274	-11.3013		9.07548						-1.36548	-0.220597	3.41373		3.71496
9.43083	1.17332	-10.3364		0.729018						-5.56417	-0.225637	3.47782		4.7333
4.34313	1.13014	-11.3282		-6.41986						-1.32539	-0.210841	3.51674		3.79618
14.7433	1.22498	-11.5977		6.46261						-7.44446	-0.21318	3.40184		4.98885
8.05459	1.22578	-11.9024		-2.02921						-0.932295	-0.216386	3.4159		3.61763
9.36978	1.19433	-11.486		-0.295424						1.75046	-0.212717	3.43701		3.06465
14.969	1.23542	-11.4615		7.03149						1.346	-0.226087	3.3616		3.05728
6.8874	1.18848	-11.358		-3.17252						0.0318892	-0.220693	3.46698		3.45994
11.8252	1.22583	-13.5372		0.958437						-2.4823	-0.206329	3.44033		3.95251
8.31353	1.17769	-10.489		-0.698227						0.112645	-0.213915	3.39125		3.36716
8.63102	1.1897	-10.1551		0.11328						-6.47287	-0.218414	3.40719		4.82096
11.1044	1.21963	-10.7908		2.75246						-6.00297	-0.212575	3.46899		4.74507
18.5069	1.19762	-11.2904		10.8737						-7.31189	-0.214975	3.42074		4.99261
11.1475	1.17638	-10.8557		2.25796						1.67401	-0.213067	3.44498		3.08831
2.2835	1.16595	-12.0725		-9.41001						-3.78673	-0.218133	3.47241		4.29842
13.308	1.22961	-12.1497		4.21389						-4.11567	-0.207401	3.46452		4.31811
12.9953	1.17711	-11.5746		3.72232						-6.83805	-0.221593	3.47325		4.98851
2.63598	1.16893	-11.6112		-8.52994						-0.581496	-0.218667	3.47357		3.60072
-0.499618	1.22512	-10.6786		-11.2907						1.41085	-0.219021	3.33466		3.02566
6.00013	1.17346	-10.8108		-3.76988						-8.56437	-0.221367	3.36892		5.26479
16.2199	1.16363	-12.0646		6.80935						5.02985	-0.215878	3.42554		2.33971
6.18743	1.21602	-12.5871		-5.063						8.36316	-0.222156	3.38929		1.53137
6.40461	1.20825	-11.6132		-3.87486						0.811798	-0.216437	3.39477		3.21906
13.9715	1.10363	-10.6943		4.72505						5.04433	-0.219615	3.44886		2.34105
19.7995	1.20701	-10.5017		13.3964						4.01372	-0.214998	3.44066		2.57772
13.5544	1.22181	-11.5614		4.99946						2.46945	-0.205916	3.38667		2.87817
7.5708	1.17913	-12.4746		-3.54763						7.4289	-0.229946	3.35344		1.64519
15.3761	1.1651	-11.4891		6.42548						1.47378	-0.215746	3.36257		3.04461
16.8063	1.23585	-10.943		9.82697						-2.14831	-0.21777	3.38185		3.84969
10.4821	1.28423	-12.074		1.3874						1.58686	-0.219309	3.42119		3.07318
14.6614	1.14864	-10.7558		6.08486						1.40849	-0.220576	3.32463		3.01395
4.03431	1.20918	-11.8178		-6.93959						-0.353729	-0.218801	3.33259		3.40999
8.61533	1.15475	-10.1361		-0.187559						-9.08093	-0.225215	3.44569		5.49085
2.38145	1.20564	-11.171		-8.29988						-5.37918	-0.219232	3.41967		4.59896
8.85439	1.22419	-13.0049		-2.16541						-0.858572	-0.220878	3.43828		3.62791
5.32742	1.21928	-10.3965		-3.90086						-6.43512	-0.210094	3.40908		4.76106
5.35826	1.20428	-11.6736		-5.22074						5.99956	-0.214687	3.43889		2.15086
11.326	1.20232	-11.4657		2.15174						-9.04458	-0.219549	3.47249		5.45822
8.16818	1.18842	-12.08		-2.37278						3.15444	-0.221005	3.40546		2.70831
3.43291	1.16223	-11.2122		-7.22233						4.21237	-0.226043	3.37723		2.42506
6.94626	1.21187	-12.4645		-4.0465						0.80886	-0.210195	3.45841		3.28839
7.00255	1.20209	-12.6822		-4.26447						-12.6083	-0.216157	3.33407		6.05945
13.055	1.25092	-11.3447		4.98606						-2.51157	-0.210287	3.40208		3.93023
11.9422	1.16664	-11.3828		2.54945						-4.97056	-0.213369	3.36066		4.42123
3.6698	1.1412	-12.0014		-7.81343						-5.13357	-0.206644	3.38823		4.44905
4.36761	1.23326	-11.4744		-6.088						-8.64898	-0.215848	3.43904		5.3059
15.1091	1.22634	-10.63		7.89879						-5.5186	-0.214306	3.34978		4.53245
19.8341	1.16396	-11.4724		11.6138						8.44191	-0.210855	3.3933		1.61328
[truncated: 8,007 more rows]

## Sheet: YL-192
	Coefficients (from excel Data analysis)	Standard Error (from excel Data analysis)									Coefficients (from excel Data analysis)	Standard Error (from excel Data analysis)
Intercept	-11.5774	0.758101								Intercept	3.42111	0.0442354
X coeff	1.20287	0.0350641								X coeff	-0.217546	0.00542497
YL-192-11679/11680	14.1225	2.03182								MEAN MAAT AIR T (˚C)	5.43803	2.58313
MAAT CALCULATION										ELEVATION CALCULATION
CALCULATED RANDOMLY 10000 TIMES										CALCULATED RANDOMLY 10000 TIMES
YL-192-11679/11680	X coeff	Intercept		MAAT AIR T (˚C)	MEAN MAAT AIR T (˚C)	STD DEV	MIN	MAX		MEAN MAAT AIR T (˚C)	X coeff	Intercept		ELEVATION (Km)	MEAN ELEVATION	STD DEV	MIN	MAX
13.9933	1.27822	-11.7314		6.15507	5.43803	2.58313	-3.69848	14.8393		6.74452	-0.215852	3.44389		1.98806	2.24442	0.562961	-0.462842	4.39147
13.5062	1.19974	-10.9666		5.23732						5.823	-0.213883	3.3591		2.11366
16.2812	1.20267	-10.7802		8.80057						4.41148	-0.21086	3.39899		2.46879
19.13	1.17563	-12.2642		10.2255						5.46686	-0.227302	3.39729		2.15466
15.7438	1.22123	-11.2027		8.02407						1.59142	-0.215006	3.43393		3.09177
14.0244	1.17873	-11.6931		4.83795						8.30471	-0.222455	3.42664		1.57922
15.5693	1.21589	-11.564		7.36653						2.54673	-0.217423	3.36882		2.8151
14.0329	1.14823	-11.455		4.65803						5.04374	-0.226997	3.43167		2.28675
18.497	1.18815	-12.2591		9.71815						3.78638	-0.225712	3.3858		2.53117
17.289	1.2078	-10.6622		10.2195						0.792072	-0.21715	3.42605		3.25405
15.2147	1.19021	-12.1268		5.98195						4.45958	-0.216849	3.45996		2.4929
13.1789	1.1901	-11.6126		4.07163						2.86636	-0.225946	3.39039		2.74275
15.586	1.24667	-11.8331		7.59758						6.76813	-0.214588	3.37712		1.92476
13.1159	1.1997	-11.6697		4.0654						6.36631	-0.212771	3.41797		2.06341
14.1954	1.17387	-12.3374		4.32612						7.21272	-0.214009	3.46469		1.9211
11.3807	1.21017	-12.3398		1.43273						1.26785	-0.212223	3.47014		3.20107
15.8939	1.1519	-12.0885		6.21965						3.46703	-0.224846	3.34175		2.5622
14.1026	1.24702	-12.6327		4.95357						3.87728	-0.213968	3.33819		2.50857
11.7522	1.16641	-11.7363		1.97162						4.71986	-0.212147	3.39714		2.39583
17.9863	1.19177	-10.8262		10.6093						2.19456	-0.213693	3.455		2.98603
12.5428	1.20527	-11.0147		4.10269						9.16646	-0.213457	3.35499		1.39834
15.4854	1.18772	-13.2173		5.17494						4.56424	-0.217554	3.42851		2.43554
12.7535	1.23428	-11.5993		4.14199						1.7205	-0.222733	3.50783		3.12461
13.9783	1.25566	-10.7962		6.75585						7.12804	-0.215868	3.40221		1.8635
12.1427	1.16763	-11.2331		2.94512						-0.737369	-0.225605	3.41512		3.58147
16.1212	1.21822	-10.1475		9.49172						8.05854	-0.216556	3.52938		1.78425
14.8876	1.25252	-11.1459		7.50115						3.30965	-0.21997	3.39647		2.66845
18.9409	1.1902	-10.9314		11.6121						5.44936	-0.211507	3.43731		2.28473
11.9042	1.23896	-11.9878		2.76102						5.07616	-0.222561	3.37929		2.24953
14.9786	1.18325	-10.6381		7.08535						5.18804	-0.223209	3.36108		2.20306
15.4935	1.24475	-11.586		7.69943						4.3445	-0.217179	3.47041		2.52688
12.7011	1.20824	-11.0675		4.27843						4.9849	-0.21133	3.48697		2.43351
14.6913	1.25113	-12.9844		5.39626						5.00862	-0.221827	3.41835		2.3073
15.3117	1.17244	-11.3994		6.55269						1.9276	-0.226575	3.47138		3.03463
15.3781	1.21919	-11.7427		7.00613						1.87859	-0.221437	3.37084		2.95485
18.7018	1.12718	-10.8303		10.25						8.82998	-0.226061	3.48935		1.49323
16.3677	1.22567	-11.6914		8.37008						3.55822	-0.217635	3.34834		2.57395
12.9308	1.17758	-11.5961		3.63092						3.38386	-0.214043	3.44747		2.72318
11.4758	1.21104	-11.9526		1.94509						3.88511	-0.217201	3.39165		2.5478
11.6352	1.22214	-11.3424		2.87745						3.38029	-0.217139	3.44341		2.70942
16.0672	1.21944	-12.2372		7.35578						7.12766	-0.211359	3.50862		2.00213
13.1603	1.18332	-11.7705		3.80242						8.21434	-0.225645	3.46801		1.61448
11.8688	1.1588	-12.1607		1.59283						4.86853	-0.212376	3.47488		2.44091
15.2478	1.19414	-9.81599		8.39196						2.37695	-0.215732	3.36847		2.85569
13.1211	1.18887	-11.2565		4.34285						5.43503	-0.217624	3.36117		2.17838
12.1168	1.21651	-11.9647		2.7755						3.95908	-0.209493	3.34564		2.51624
11.4532	1.21404	-10.0569		3.8477						9.1601	-0.211948	3.44971		1.50825
14.9178	1.21537	-11.9287		6.20191						4.41635	-0.225303	3.35242		2.35741
15.7443	1.20601	-12.2915		6.69628						3.59868	-0.221693	3.44382		2.64601
12.1421	1.30337	-10.8932		4.93237						8.62692	-0.214982	3.40901		1.55437
16.1655	1.2072	-11.7543		7.76069						5.04855	-0.221716	3.37928		2.25994
13.625	1.21029	-12.072		4.41822						5.38728	-0.219348	3.48735		2.30566
13.3683	1.10103	-10.8564		3.86244						6.29176	-0.216043	3.36662		2.00733
17.7416	1.13497	-12.2601		7.87622						1.72863	-0.224925	3.42438		3.03556
14.5083	1.14387	-11.8885		4.70709						7.60481	-0.215988	3.43664		1.79409
11.6737	1.19719	-11.6942		2.28139						1.55948	-0.216431	3.40987		3.07235
11.8941	1.16977	-13.2035		0.709908						3.47237	-0.21224	3.47076		2.73378
13.6491	1.1426	-10.6498		4.94566						3.55546	-0.213033	3.40029		2.64286
16.0431	1.20427	-11.7712		7.54918						5.3881	-0.222166	3.45241		2.25536
12.7563	1.20149	-10.6971		4.62945						5.41685	-0.219263	3.43917		2.25145
13.0629	1.19089	-11.1801		4.37631						4.20707	-0.217362	3.4449		2.53044
12.0268	1.19568	-10.8254		3.55476						2.80279	-0.220767	3.50352		2.88475
14.3892	1.2047	-11.2956		6.03912						4.03788	-0.217229	3.42808		2.55094
13.3105	1.2166	-10.847		5.34656						4.08628	-0.20908	3.36118		2.50682
14.6943	1.1628	-11.9498		5.13675						2.05377	-0.219587	3.45077		2.99979
17.1463	1.12918	-12.1899		7.17139						1.93248	-0.212894	3.47828		3.06687
13.0237	1.24177	-11.7989		4.37359						7.66085	-0.224251	3.43291		1.71496
16.6268	1.22169	-10.7998		9.51296						5.9331	-0.205392	3.35752		2.1389
11.4123	1.17115	-12.6126		0.752859						5.26927	-0.224579	3.39354		2.21018
15.2858	1.17138	-11.2337		6.67177						3.33549	-0.210391	3.40858		2.70683
14.2249	1.22826	-12.2461		5.22568						4.98611	-0.223882	3.48309		2.36678
14.2692	1.17941	-11.2812		5.54804						8.32954	-0.216478	3.4943		1.69114
11.8629	1.18414	-10.6622		3.38515						6.87935	-0.220081	3.4028		1.88879
12.4356	1.1686	-12.1758		2.3564						9.62803	-0.211303	3.39973		1.3653
13.1928	1.19306	-11.2683		4.47159						5.75309	-0.217572	3.44479		2.19308
9.75243	1.13838	-11.4758		-0.373861						5.32187	-0.209383	3.52658		2.41227
13.5997	1.18635	-12.0423		4.09169						5.24197	-0.210628	3.4481		2.344
13.5178	1.19805	-11.7313		4.46362						3.90802	-0.216856	3.45337		2.6059
14.4159	1.1949	-11.8017		5.42376						7.14114	-0.225005	3.46848		1.86169
14.6113	1.21017	-11.6518		6.03039						3.90166	-0.219382	3.35268		2.49673
16.4817	1.20029	-10.6207		9.16199						5.99122	-0.219211	3.39875		2.08541
12.7034	1.19962	-12.0813		3.15792						1.07519	-0.216047	3.33978		3.10749
17.9589	1.1713	-12.528		8.50718						3.13489	-0.214137	3.381		2.7097
15.168	1.20202	-10.0316		8.20072						6.05023	-0.227487	3.43058		2.05423
13.3784	1.19831	-11.7748		4.2567						6.49435	-0.223311	3.4173		1.96705
11.4113	1.21257	-10.9056		2.93134						5.91273	-0.226496	3.45703		2.11782
12.035	1.25848	-10.9282		4.21758						9.11412	-0.212531	3.42635		1.48931
17.0886	1.21427	-10.9691		9.78103						8.85327	-0.219916	3.44672		1.49975
8.98371	1.2412	-11.2694		-0.118757						3.0965	-0.214383	3.45365		2.78982
12.64	1.26501	-11.5538		4.436						5.98775	-0.226379	3.42498		2.06949
15.0821	1.27569	-11.8344		7.40566						3.42606	-0.222223	3.3141		2.55275
15.833	1.19059	-11.3558		7.49481						1.40545	-0.220509	3.42738		3.11746
13.5628	1.23259	-9.27755		7.43984						3.47304	-0.228807	3.36323		2.56857
16.6879	1.2107	-11.1484		9.05562						4.12112	-0.216793	3.42637		2.53294
15.6012	1.20656	-11.3804		7.44329						4.7528	-0.213178	3.3867		2.37351
16.9962	1.21008	-11.7519		8.81492						2.79586	-0.213415	3.42946		2.83278
14.7376	1.18886	-11.9015		5.61937						8.8327	-0.209619	3.41235		1.56086
18.7795	1.24461	-11.9011		11.4721						2.61575	-0.213443	3.40281		2.84449
14.8539	1.1517	-11.7563		5.35094						9.50594	-0.211876	3.46914		1.45507
15.0314	1.13721	-11.5771		5.51681						11.0421	-0.211595	3.34906		1.01262
15.7011	1.14898	-12.2574		5.78286						2.52816	-0.219891	3.37337		2.81745
13.3495	1.19695	-11.9304		4.04836						7.70386	-0.222673	3.42285		1.70741
15.9243	1.20815	-11.8558		7.38321						3.30159	-0.223578	3.42355		2.68539
13.4695	1.16258	-11.3092		4.35018						7.28229	-0.213079	3.40328		1.85157
18.7226	1.2239	-11.4923		11.4224						9.38129	-0.218121	3.35299		1.30673
12.2857	1.21256	-11.7792		3.11793						9.56757	-0.218894	3.45489		1.36061
14.2127	1.20852	-9.83274		7.34367						6.23934	-0.22408	3.4417		2.04358
15.8658	1.18726	-11.0814		7.7555						6.96426	-0.20896	3.31784		1.8626
13.0498	1.20271	-10.5044		5.19066						6.23606	-0.21981	3.40808		2.03734
13.9653	1.18811	-11.1189		5.47347						8.79721	-0.219881	3.44635		1.51201
12.5062	1.19022	-11.7855		3.09962						4.48814	-0.208087	3.41414		2.48022
13.5483	1.18649	-10.8725		5.20237						7.3021	-0.225744	3.47725		1.82884
10.5932	1.27147	-11.8688		1.60017						4.41696	-0.208666	3.4146		2.49294
12.7461	1.23185	-12.4158		3.28543						2.54494	-0.214471	3.43702		2.8912
14.6808	1.25557	-12.1347		6.29811						7.64261	-0.226516	3.39057		1.6594
11.8242	1.24737	-11.306		3.44317						5.86182	-0.221831	3.44749		2.14716
13.0083	1.19758	-10.9176		4.66092						7.9115	-0.220621	3.47624		1.7308
10.6313	1.24347	-12.7178		0.501898						9.01683	-0.221536	3.44282		1.44527
14.9069	1.21725	-11.5012		6.64425						5.57742	-0.22018	3.3926		2.16456
16.9506	1.2543	-11.2442		10.0169						4.10852	-0.208762	3.37781		2.52011
12.5092	1.26507	-12.7804		3.04468						5.95759	-0.218655	3.3705		2.06785
16.679	1.17861	-10.3153		9.34271						10.0022	-0.226002	3.50171		1.2412
14.82	1.17828	-11.1211		6.34094						3.95856	-0.22214	3.41849		2.53914
14.3124	1.17065	-12.4852		4.26951						5.90553	-0.22005	3.45419		2.15468
10.5396	1.18332	-10.2921		2.17966						2.57244	-0.206914	3.38108		2.84881
13.0844	1.2383	-11.2654		4.93703						5.28892	-0.215251	3.34921		2.21077
13.6526	1.19058	-10.1301		6.12436						6.12998	-0.219949	3.41666		2.06838
12.6626	1.20474	-11.0441		4.21096						6.84918	-0.224371	3.4906		1.95384
13.0746	1.17856	-12.5539		2.85525						4.01275	-0.206919	3.40239		2.57207
11.9602	1.25308	-9.89435		5.09272						9.03939	-0.223536	3.43157		1.41095
16.9553	1.19788	-11.4946		8.81579						4.26726	-0.224438	3.45948		2.50175
11.2534	1.20512	-11.845		1.71662						0.422386	-0.214783	3.40548		3.31476
14.2894	1.19666	-11.5809		5.51876						4.75709	-0.220213	3.34116		2.29359
16.07	1.19161	-11.6688		7.48033						8.34126	-0.224891	3.38047		1.5046
14.9547	1.19332	-12.4997		5.34607						5.00794	-0.223009	3.5025		2.38569
14.8419	1.24133	-10.2661		8.15758						3.65466	-0.216299	3.3832		2.5927
18.0918	1.21732	-11.4075		10.6161						9.36878	-0.206566	3.39337		1.4581
11.7286	1.25265	-12.1597		2.5322						5.39355	-0.217262	3.42207		2.25026
18.3642	1.12949	-11.8232		8.9189						4.16618	-0.213412	3.43667		2.54756
15.9243	1.20889	-12.6556		6.59514						8.94522	-0.226531	3.38097		1.3546
12.7721	1.1649	-11.6949		3.18328						8.37978	-0.214187	3.39869		1.60385
13.9975	1.14094	-10.6682		5.30213						4.33526	-0.221542	3.49431		2.53387
10.886	1.19604	-10.4463		2.57382						5.79093	-0.216492	3.43261		2.17892
17.0569	1.18046	-11.9781		8.15684						7.27585	-0.223416	3.37368		1.74814
11.1032	1.16344	-10.9835		1.93445						9.49141	-0.222811	3.39118		1.27639
11.5993	1.19997	-11.2114		2.70748						6.57027	-0.206726	3.40687		2.04862
13.6756	1.26914	-11.744		5.61223						0.950547	-0.214578	3.36515		3.16118
15.6164	1.216	-12.5877		6.40186						8.86729	-0.211103	3.39633		1.52441
15.9883	1.22863	-10.9712		8.67259						7.38799	-0.216448	3.40841		1.80929
16.4758	1.22002	-11.4449		8.65597						4.84007	-0.210616	3.43373		2.41433
14.7169	1.20329	-11.8679		5.84077						8.49684	-0.226288	3.42081		1.49809
14.5792	1.23817	-11.3989		6.65266						4.60621	-0.211309	3.29419		2.32086
13.3669	1.25201	-11.6458		5.08962						1.1011	-0.224719	3.39255		3.14512
12.8725	1.1797	-10.5769		4.6088						3.46871	-0.21973	3.50511		2.74293
14.8731	1.23148	-11.1637		7.15225						5.76078	-0.222578	3.40807		2.12584
13.0604	1.22129	-10.8592		5.09138						9.01845	-0.224663	3.47241		1.4463
13.6626	1.20411	-11.643		4.80818						5.00534	-0.224106	3.40642		2.2847
11.6202	1.21729	-9.67392		4.47118						3.69309	-0.222211	3.48493		2.66428
14.0307	1.18811	-10.7286		5.94148						8.94475	-0.217629	3.40969		1.46305
13.101	1.13229	-10.3599		4.47429						6.40296	-0.221479	3.45911		2.04098
13.6524	1.22601	-12.0068		4.73118						4.04543	-0.221003	3.45576		2.56171
17.4497	1.21016	-11.2165		9.90045						7.16698	-0.215267	3.42672		1.88391
10.4885	1.25681	-11.5116		1.67047						10.2783	-0.22186	3.43953		1.15917
12.8069	1.19481	-11.7901		3.51173						5.4987	-0.211399	3.40472		2.2423
14.1306	1.23153	-11.4593		5.94303						8.57745	-0.225103	3.43448		1.50367
14.3118	1.19673	-12.899		4.22842						6.71639	-0.216556	3.41199		1.95751
15.2023	1.23406	-12.3899		6.37058						6.56342	-0.216635	3.45759		2.03572
14.7318	1.27465	-12.296		6.48189						-0.0965072	-0.213253	3.41495		3.43553
12.0516	1.1855	-11.1772		3.11009						4.20686	-0.211835	3.3975		2.50634
12.3456	1.21725	-11.817		3.21081						8.55291	-0.214509	3.43054		1.59586
12.3839	1.21123	-10.3672		4.63251						7.41887	-0.224845	3.3535		1.6854
15.8287	1.20994	-11.092		8.05976						3.39018	-0.224993	3.38313		2.62036
14.5301	1.22697	-12.0969		5.73105						0.69899	-0.219138	3.44595		3.29277
15.5387	1.19277	-11.5747		6.95935						4.70928	-0.21267	3.46114		2.45962
11.7384	1.23018	-13.1242		1.31626						-0.527748	-0.220893	3.45396		3.57053
15.807	1.22745	-10.4735		8.92881						4.72858	-0.223612	3.38141		2.32404
8.92448	1.24336	-11.6278		-0.53146						5.08081	-0.22414	3.48649		2.34768
13.686	1.21912	-11.6484		5.0364						2.81707	-0.226459	3.43024		2.79229
14.3194	1.18016	-12.5732		4.32597						7.98204	-0.217796	3.38004		1.64158
11.3562	1.2601	-9.16139		5.14856						4.19975	-0.215428	3.48829		2.58355
12.2761	1.21264	-11.7129		3.17352						6.51723	-0.222857	3.35803		1.90561
9.56535	1.23601	-11.6223		0.200592						2.08013	-0.218302	3.39292		2.93882
13.7517	1.16055	-12.6815		3.278						4.24133	-0.222337	3.603		2.65999
17.1618	1.22698	-11.2164		9.84077						5.82493	-0.221574	3.43204		2.14138
12.4555	1.16444	-11.3793		3.12435						5.51419	-0.218145	3.459		2.2561
15.6158	1.22114	-10.4573		8.61183						7.62939	-0.213212	3.42085		1.79418
13.7698	1.212	-11.3835		5.30543						5.44332	-0.215667	3.3668		2.19286
17.6431	1.23547	-11.8118		9.98576						8.39882	-0.225082	3.44327		1.55285
15.056	1.19146	-12.8882		5.05036						7.32923	-0.212661	3.36397		1.80532
13.711	1.20538	-11.1742		5.35274						11.0692	-0.219535	3.52675		1.09667
10.4168	1.24609	-11.9358		1.04439						4.26846	-0.216922	3.35383		2.42791
11.7753	1.16792	-12.4662		1.28646						1.54919	-0.202358	3.46342		3.14993
13.8865	1.26411	-11.4905		6.06357						2.97611	-0.224496	3.36579		2.69766
15.7534	1.23386	-11.1422		8.29525						8.50834	-0.217603	3.44976		1.59832
14.0455	1.22947	-10.8879		6.38052						7.70653	-0.222065	3.43606		1.72472
11.1467	1.22172	-10.7551		2.86298						6.06171	-0.21203	3.40802		2.12276
13.9933	1.22206	-10.8688		6.2318						3.92273	-0.208927	3.35667		2.5371
12.3698	1.2134	-11.4631		3.5464						3.9212	-0.217138	3.42749		2.57605
12.8181	1.22264	-11.3734		4.29851						8.74589	-0.218278	3.47913		1.5701
11.9087	1.2136	-10.8562		3.59621						7.39039	-0.211553	3.43444		1.87097
14.8358	1.19063	-11.4485		6.21535						0.778814	-0.217642	3.46742		3.29791
14.3703	1.15162	-12.359		4.19027						4.39676	-0.215803	3.42138		2.47254
13.8917	1.30039	-11.3479		6.71666						4.05668	-0.218888	3.43064		2.54268
13.6418	1.21159	-12.1491		4.37914						6.14313	-0.220169	3.47402		2.12149
13.5671	1.18593	-10.7984		5.29119						0.628443	-0.215126	3.43835		3.30316
12.1889	1.22394	-12.5752		2.34325						3.46932	-0.223104	3.40751		2.63349
12.2318	1.21266	-10.9917		3.84132						5.80565	-0.224239	3.43806		2.13621
14.8075	1.15156	-11.1726		5.87914						4.00401	-0.21695	3.53907		2.6704
11.469	1.18176	-10.3537		3.19998						8.26273	-0.214834	3.3795		1.60439
15.2305	1.12408	-11.4075		5.71284						3.45312	-0.221058	3.45743		2.69409
15.1333	1.27383	-12.1922		7.08512						5.27716	-0.211386	3.41343		2.29792
14.795	1.2027	-12.0532		5.7408						5.08379	-0.217479	3.44417		2.33855
14.072	1.23924	-12.3698		5.06876						10.8441	-0.222087	3.42015		1.0118
13.3971	1.1828	-11.658		4.18799						1.85888	-0.217434	3.33637		2.93219
14.9017	1.14135	-11.4708		5.5373						8.47121	-0.22306	3.45023		1.56065
11.3598	1.1828	-13.5011		-0.0647385						10.7295	-0.215439	3.4315		1.11996
9.78759	1.15662	-11.9551		-0.634663						5.57154	-0.221286	3.43891		2.20601
14.0157	1.14972	-11.5499		4.56413						4.89962	-0.223707	3.38162		2.28555
12.9656	1.19555	-11.6061		3.89488						8.13556	-0.211553	3.42319		1.70209
11.1214	1.14621	-11.1603		1.58727						3.36644	-0.213137	3.36954		2.65202
11.9683	1.17645	-11.408		2.67215						5.66878	-0.214359	3.41528		2.20012
15.9558	1.1758	-12.8812		5.87971						3.16908	-0.227409	3.4597		2.73902
18.1215	1.19467	-11.2018		10.4475						1.63142	-0.20565	3.39262		3.05712
15.9834	1.23537	-11.7694		7.97597						7.17316	-0.216812	3.41577		1.86054
18.0607	1.16354	-11.3375		9.67701						8.0707	-0.216822	3.43857		1.68866
15.9733	1.17797	-11.5062		7.30987						7.44462	-0.210876	3.41573		1.84584
14.48	1.23521	-10.6493		7.23652						7.58512	-0.219448	3.49365		1.82912
15.9813	1.20243	-11.6487		7.56765						0.847583	-0.217255	3.40604		3.22189
14.8364	1.25773	-10.7269		7.93331						5.70571	-0.229631	3.47647		2.16626
11.6478	1.28266	-12.4574		2.48274						4.00796	-0.222091	3.37403		2.4839
15.2262	1.23624	-11.28		7.54319						4.444	-0.219701	3.37367		2.39732
14.0281	1.10675	-10.7048		4.8207						7.66244	-0.219201	3.47496		1.79535
15.5488	1.21351	-10.4172		8.45136						5.42386	-0.216217	3.41208		2.23935
15.1517	1.22515	-10.9443		7.61879						5.03605	-0.220212	3.4631		2.3541
13.4572	1.14808	-10.6338		4.81603						1.24049	-0.224612	3.38185		3.10322
12.0144	1.16594	-10.9785		3.02956						8.02852	-0.229391	3.41784		1.57617
13.2894	1.18458	-11.3278		4.41452						6.90661	-0.213289	3.37152		1.89842
8.2377	1.1581	-11.9534		-2.41335						2.07947	-0.217666	3.34085		2.88821
15.3156	1.2067	-11.8482		6.63328						3.39166	-0.216805	3.40792		2.67259
9.66703	1.18044	-11.1113		0.299966						1.34105	-0.21722	3.41241		3.1211
18.0458	1.17743	-11.4457		9.80203						7.83445	-0.218519	3.42922		1.71724
11.8507	1.13573	-11.802		1.65714						3.92159	-0.215058	3.50393		2.66056
13.0022	1.23708	-10.501		5.5838						9.30127	-0.221159	3.42139		1.36434
15.8602	1.20706	-13.0768		6.06747						4.54382	-0.212175	3.47716		2.51307
12.0101	1.18761	-11.6893		2.57395						6.65805	-0.207858	3.53394		2.15001
14.3725	1.22122	-11.5329		6.01912						5.77974	-0.221743	3.34294		2.06133
11.6315	1.23971	-13.5364		0.883279						4.74673	-0.207958	3.35707		2.36995
16.9234	1.22606	-11.9037		8.84534						4.48576	-0.210179	3.40014		2.45733
16.5353	1.24652	-12.1418		8.46976						5.20593	-0.210646	3.38744		2.29084
11.7627	1.22175	-12.8451		1.52605						3.49633	-0.220645	3.35629		2.58485
14.8782	1.20447	-11.92		6.00033						6.82353	-0.22243	3.28533		1.76757
16.8333	1.16432	-10.4346		9.16468						5.03104	-0.219575	3.44603		2.34134
15.3615	1.2456	-10.5842		8.55012						6.08678	-0.21405	3.38216		2.07928
15.1225	1.205	-11.882		6.34072						4.15489	-0.214033	3.43296		2.54368
13.7194	1.16758	-11.7772		4.24133						6.13389	-0.221825	3.41732		2.05667
13.0468	1.23439	-10.6411		5.46386						3.5135	-0.209434	3.40557		2.66973
16.0294	1.20012	-11.8882		7.34898						2.4933	-0.224241	3.28877		2.72967
9.8569	1.19291	-10.9608		0.797602						5.0374	-0.216293	3.36206		2.27251
16.4919	1.17304	-11.771		7.57462						8.23343	-0.215976	3.37816		1.59993
15.8001	1.2061	-10.0495		9.00692						6.74533	-0.217708	3.34843		1.87992
16.6305	1.16942	-11.8322		7.61573						3.26598	-0.223871	3.30264		2.57148
14.3837	1.17242	-9.84846		7.0152						8.17504	-0.227027	3.34976		1.49381
15.1382	1.16933	-11.8696		5.83195						6.47849	-0.213078	3.43929		2.05887
13.1474	1.21694	-11.6963		4.30324						8.03355	-0.208357	3.37103		1.69719
11.2853	1.19569	-12.3753		1.11849						5.64891	-0.207924	3.43961		2.26506
11.3739	1.24765	-11.0143		3.17625						2.70794	-0.217235	3.42986		2.8416
15.8067	1.17528	-12.195		6.38233						8.64036	-0.211792	3.45284		1.62288
15.122	1.22664	-11.7555		6.7938						5.08209	-0.210181	3.46557		2.39742
17.1368	1.25501	-12.1315		9.3753						4.1688	-0.21162	3.46543		2.58323
12.5986	1.12879	-10.1197		4.10145						1.20194	-0.216148	3.42746		3.16766
14.8233	1.20936	-12.16		5.76671						3.56404	-0.22109	3.44665		2.65867
17.9281	1.14969	-11.4438		9.16784						2.89122	-0.220884	3.39897		2.76035
12.6532	1.31025	-10.9523		5.62659						8.95611	-0.216462	3.37312		1.43446
14.819	1.21167	-10.8344		7.12132						5.37723	-0.218482	3.40336		2.22854
12.7838	1.18299	-11.7282		3.39488						3.49935	-0.218787	3.40525		2.63964
14.519	1.2307	-12.1535		5.71502						3.79961	-0.222712	3.37416		2.52794
17.2515	1.15862	-11.7661		8.22179						8.72779	-0.203063	3.43816		1.66587
15.0622	1.15589	-11.9333		5.47699						5.93874	-0.227847	3.35764		2.00451
11.7793	1.1741	-10.8375		2.99258						6.43251	-0.222326	3.45413		2.02401
11.9111	1.18002	-10.7918		3.26348						5.39816	-0.210326	3.36315		2.22778
13.9702	1.2154	-12.1809		4.79854						6.97299	-0.214219	3.40123		1.90748
19.333	1.19761	-12.0857		11.0678						2.42	-0.224013	3.41878		2.87666
12.1704	1.1959	-12.8025		1.75206						6.40954	-0.213467	3.4538		2.08557
13.4436	1.22666	-12.3713		4.11946						5.16742	-0.219221	3.4355		2.30269
13.4255	1.1878	-11.0661		4.8807						7.60826	-0.224035	3.42772		1.7232
12.4212	1.19035	-10.5589		4.22662						7.97725	-0.231434	3.42932		1.58311
11.12	1.19302	-11.0425		2.22393						5.96488	-0.219931	3.36209		2.05023
12.9352	1.25239	-12.4799		3.72009						2.71888	-0.224546	3.45142		2.84091
15.1574	1.1606	-11.1986		6.39302						4.85106	-0.215612	3.3629		2.31695
14.76	1.17387	-10.5215		6.80487						5.14397	-0.210716	3.39973		2.31581
14.3115	1.16072	-12.3864		4.22516						1.3362	-0.217894	3.35882		3.06767
12.1186	1.19358	-10.8142		3.65032						7.99611	-0.211184	3.37248		1.68383
14.5377	1.1938	-11.9996		5.3555						6.55539	-0.211456	3.44036		2.05418
11.2753	1.19715	-12.0158		1.48247						7.6344	-0.218841	3.45491		1.78419
12.0865	1.20501	-11.3774		3.18697						7.03338	-0.217507	3.4141		1.88429
9.71567	1.20134	-10.9869		0.684959						3.85236	-0.214081	3.39708		2.57236
16.3447	1.17852	-11.8906		7.37184						7.87531	-0.213595	3.44785		1.76572
14.6793	1.16536	-12.3854		4.72129						9.76697	-0.219224	3.42176		1.28061
18.5334	1.22045	-11.6658		10.9533						4.07681	-0.225712	3.43808		2.51789
14.6108	1.23846	-11.7587		6.33612						2.03895	-0.2255	3.37552		2.91574
13.5454	1.21968	-11.6748		4.84627						4.6814	-0.216477	3.48119		2.46778
13.7004	1.19299	-11.2027		5.14174						3.55976	-0.211794	3.45339		2.69945
14.9401	1.21673	-11.0076		7.17044						6.5548	-0.213273	3.41618		2.01821
12.7651	1.21353	-11.1993		4.29147						2.65548	-0.220899	3.41574		2.82915
11.403	1.23227	-11.2172		2.83442						4.78851	-0.215197	3.47421		2.44374
13.0958	1.2534	-11.6146		4.79977						6.59249	-0.225665	3.45287		1.96517
15.3363	1.21238	-10.2265		8.36684						2.09495	-0.215638	3.36805		2.9163
17.4547	1.25572	-12.0741		9.84407						5.53867	-0.217427	3.37275		2.1685
17.3041	1.19357	-12.0716		8.58199						5.97741	-0.223848	3.46839		2.13036
13.8032	1.20503	-10.1269		6.50643						7.95015	-0.22234	3.39966		1.63203
11.4523	1.18418	-11.7318		1.8298						2.00944	-0.216926	3.47819		3.04229
12.566	1.20199	-11.3715		3.73274						7.56761	-0.212777	3.52623		1.91602
14.0484	1.19699	-11.4912		5.32455						5.26344	-0.214464	3.31456		2.18574
15.985	1.20323	-11.5036		7.7301						4.18497	-0.217167	3.36412		2.45528
15.7937	1.19741	-11.503		7.40864						7.2281	-0.21649	3.4612		1.89638
15.384	1.20905	-12.4034		6.1966						2.65265	-0.221454	3.40154		2.8141
14.9263	1.21201	-13.1747		4.91605						3.69192	-0.216945	3.39098		2.59004
12.2571	1.17353	-11.1739		3.21013						1.44761	-0.211334	3.38375		3.07782
14.0302	1.22259	-12.1065		5.04668						0.927742	-0.210356	3.42723		3.23208
14.2728	1.23329	-13.1627		4.43978						4.88005	-0.208832	3.39213		2.37301
15.455	1.21731	-11.6257		7.18785						2.36507	-0.221545	3.39836		2.87439
12.0926	1.20542	-11.8879		2.68874						3.53969	-0.221294	3.40995		2.62663
15.0524	1.17633	-11.3246		6.38207						4.74243	-0.216262	3.38503		2.35942
14.4183	1.2274	-10.0116		7.68536						1.59232	-0.218992	3.43444		3.08574
14.9748	1.16209	-11.6159		5.78612						1.98364	-0.217835	3.38072		2.94862
13.5817	1.20882	-12.1694		4.24836						5.96368	-0.222828	3.48606		2.15718
12.8991	1.22735	-10.022		5.80966						7.75315	-0.210284	3.50532		1.87496
12.7865	1.27352	-12.111		4.17295						5.6104	-0.219947	3.3724		2.13842
16.2668	1.21361	-11.4973		8.24429						2.99486	-0.224518	3.41712		2.74472
11.9832	1.20134	-11.8		2.59598						6.35184	-0.225312	3.34986		1.91872
14.0227	1.19817	-11.2947		5.5069						1.40922	-0.215615	3.42256		3.11871
16.8849	1.14753	-10.792		8.58398						6.21774	-0.209712	3.37921		2.07528
14.6854	1.1802	-11.6164		5.71542						4.30148	-0.222771	3.43469		2.47644
12.7868	1.17894	-11.8419		3.23296						7.47258	-0.216546	3.45661		1.83845
12.9441	1.17832	-10.5395		4.71282						5.14695	-0.222205	3.4483		2.30463
15.9818	1.2192	-11.9492		7.53578						5.23439	-0.205899	3.4658		2.38805
11.6927	1.22423	-13.0232		1.2915						4.89198	-0.225668	3.44051		2.33655
13.8768	1.18393	-11.7213		4.70788						-0.235911	-0.214025	3.32436		3.37485
11.9633	1.20592	-10.8908		3.53589						3.0735	-0.226494	3.41399		2.71786
13.5627	1.15809	-11.5636		4.14328						-1.02212	-0.213474	3.42414		3.64233
18.4347	1.22286	-12.677		9.86603						5.65496	-0.216532	3.53041		2.30593
13.2858	1.24268	-10.3777		6.1323						8.05594	-0.221418	3.42163		1.6379
12.1866	1.16341	-11.3811		2.79694						8.41631	-0.214023	3.41589		1.6146
12.6914	1.25322	-10.2774		5.6276						9.59615	-0.212862	3.35628		1.31363
16.7299	1.14955	-11.0007		8.23109						0.347374	-0.216903	3.40019		3.32484
10.9825	1.23124	-11.2966		2.22555						7.0007	-0.21794	3.42986		1.90413
18.4075	1.17221	-11.2592		10.3182						5.54977	-0.207908	3.39083		2.23699
15.2402	1.20123	-11.2661		7.04096						6.05529	-0.222112	3.43198		2.08703
16.8869	1.229	-10.8183		9.93577						5.81266	-0.21498	3.39049		2.14088
15.4277	1.18825	-12.479		5.85306						7.1461	-0.212159	3.47775		1.96164
14.002	1.21733	-11.0427		6.00233						4.25565	-0.210876	3.46094		2.56353
14.0001	1.18857	-12.1241		4.51593						3.86522	-0.226164	3.50872		2.63454
14.873	1.21383	-11.275		6.77838						8.38568	-0.2267	3.48546		1.58443
17.5462	1.17806	-10.6661		10.0045						5.43102	-0.229144	3.39886		2.15437
18.0357	1.25034	-12.6564		9.89435						5.93461	-0.207123	3.36639		2.1372
11.9453	1.15036	-12.2272		1.51415						8.8645	-0.222106	3.44295		1.47409
16.2366	1.27232	-12.5974		8.06083						5.92676	-0.22214	3.35964		2.04307
18.4367	1.17087	-12.1845		9.40248						4.63297	-0.215541	3.32372		2.32513
16.0927	1.15536	-11.5627		7.03021						8.43892	-0.223677	3.43368		1.54609
13.3675	1.19605	-12.5626		3.42564						4.65124	-0.225405	3.40764		2.35923
17.2848	1.16892	-13.0441		7.16047						5.24321	-0.222885	3.48458		2.31595
14.5021	1.19484	-12.2755		5.05216						4.64961	-0.212941	3.47985		2.48976
14.556	1.2516	-11.8841		6.33417						3.62599	-0.217263	3.41591		2.62812
14.544	1.10147	-10.935		5.08481						5.02331	-0.211255	3.39803		2.33683
13.1247	1.17701	-12.1508		3.29714						2.79474	-0.219465	3.45187		2.83852
13.1726	1.15474	-11.1091		4.10188						2.01819	-0.218196	3.4015		2.96114
16.8996	1.22492	-10.2308		10.4699						7.13412	-0.221323	3.49648		1.91754
11.7062	1.21608	-11.2528		2.98299						1.59051	-0.210853	3.39446		3.0591
15.3892	1.15882	-12.1918		5.64155						4.85266	-0.216157	3.42263		2.3737
10.8415	1.21321	-10.9878		2.16516						5.08761	-0.214102	3.47138		2.38212
13.0177	1.14363	-10.461		4.4264						4.44304	-0.215949	3.44454		2.48507
11.6202	1.18699	-11.9918		1.80123						9.40606	-0.216288	3.38234		1.34793
13.0444	1.19209	-12.1868		3.36334						-0.615445	-0.22334	3.39197		3.52942
13.2556	1.22847	-12.8177		3.46639						5.65366	-0.20937	3.39538		2.21167
15.2928	1.2243	-11.8355		6.88741						1.84194	-0.229448	3.50215		3.07952
15.2901	1.22107	-10.7649		7.9055						7.41529	-0.21615	3.37172		1.76891
9.65443	1.19815	-11.0283		0.539136						1.85483	-0.225277	3.47924		3.06139
12.0562	1.22337	-10.7021		4.04709						2.94898	-0.215309	3.46772		2.83277
18.7059	1.17603	-11.4605		10.5382						7.49284	-0.213518	3.38542		1.78556
13.8948	1.19984	-10.7289		5.94258						7.19653	-0.210541	3.41881		1.90365
13.8596	1.26997	-12.8546		4.74668						3.46524	-0.217951	3.40693		2.65168
13.2965	1.23243	-11.1309		5.25623						9.18343	-0.218935	3.36963		1.35906
15.787	1.24358	-9.97484		9.65748						4.90489	-0.213758	3.39573		2.34728
12.0111	1.22555	-11.444		3.27623						6.57962	-0.216119	3.36959		1.94761
14.839	1.22324	-11.5969		6.55465						3.88961	-0.228319	3.35394		2.46587
15.4822	1.22212	-12.0802		6.84083						4.54383	-0.215185	3.4519		2.47413
14.4949	1.17922	-10.9909		6.10169						8.22929	-0.218287	3.35722		1.56088
14.4389	1.18707	-11.718		5.42197						2.28379	-0.224053	3.56698		3.05529
11.7281	1.29855	-13.0893		2.14021						7.5176	-0.2197	3.51986		1.86824
12.2554	1.17854	-10.5822		3.86125						2.51118	-0.218837	3.48689		2.93735
13.8908	1.14303	-10.8309		5.04679						5.53717	-0.21345	3.338		2.15609
16.4018	1.14853	-11.7396		7.09839						3.79717	-0.209179	3.38756		2.59327
19.5938	1.23653	-10.3696		13.8588						4.14035	-0.216035	3.49893		2.60446
17.8764	1.21267	-12.5801		9.09807						3.55165	-0.218055	3.46979		2.69534
16.0896	1.17741	-11.2749		7.66921						6.39628	-0.215599	3.44651		2.06748
13.6065	1.23837	-11.9148		4.93509						6.36524	-0.226068	3.47068		2.0317
14.6873	1.14784	-12.9062		3.95244						2.16782	-0.22008	3.37911		2.90201
13.0116	1.19439	-11.4899		4.05105						6.73832	-0.219976	3.44049		1.95822
12.6649	1.19836	-12.1072		3.06995						1.87139	-0.213803	3.42064		3.02053
10.7724	1.13147	-10.3916		1.79711						7.9442	-0.216429	3.3868		1.66744
13.6733	1.25699	-11.746		5.44132						2.50978	-0.213245	3.41297		2.87777
13.0524	1.16152	-11.4813		3.67934						6.10409	-0.220777	3.33107		1.98343
10.1757	1.22048	-11.6776		0.741636						4.54996	-0.211243	3.46339		2.50224
17.025	1.19112	-12.0165		8.26235						6.67319	-0.224661	3.39121		1.89201
15.5365	1.21019	-12.1827		6.61955						1.36485	-0.217917	3.35042		3.05299
13.587	1.21574	-12.6254		3.89282						5.95041	-0.213419	3.37294		2.10301
14.2658	1.24912	-10.7854		7.03433						4.1575	-0.213714	3.43361		2.5451
15.3019	1.20401	-10.5337		7.88992						4.12739	-0.218323	3.54088		2.63977
11.412	1.22859	-12.5062		1.5145						4.52286	-0.219669	3.45374		2.4602
11.967	1.1722	-11.0111		3.01653						5.90316	-0.221835	3.32809		2.01856
11.0682	1.22501	-12.2629		1.29582						4.51693	-0.224898	3.46689		2.45104
12.4206	1.2228	-10.6251		4.56285						5.91742	-0.220541	3.36738		2.06235
12.9194	1.21475	-10.5303		5.16353						2.6056	-0.218185	3.41586		2.84736
11.7567	1.20965	-13.8449		0.376576						10.445	-0.2118	3.4472		1.23495
14.8029	1.23358	-10.7494		7.51119						8.59066	-0.218394	3.37998		1.50383
14.9822	1.20123	-13.054		4.94307						3.3101	-0.213801	3.4396		2.7319
12.9796	1.17465	-11.7565		3.49002						6.1055	-0.215609	3.43812		2.12171
16.6473	1.2908	-10.3661		11.1222						6.40386	-0.220987	3.44533		2.03016
12.5628	1.23531	-11.5403		3.97868						5.06599	-0.221532	3.41784		2.29557
12.5938	1.14129	-11.504		2.8692						6.2957	-0.213045	3.46226		2.12099
13.6969	1.22694	-12.1168		4.68838						4.56274	-0.223814	3.45405		2.43284
15.5374	1.18895	-12.2566		6.21666						8.00648	-0.21627	3.44995		1.71839
13.7917	1.19677	-12.1129		4.39251						0.795128	-0.221853	3.38171		3.20531
14.9549	1.19839	-10.7981		7.12364						11.5953	-0.220822	3.37137		0.810863
15.3226	1.20668	-11.8387		6.65082						8.25765	-0.207058	3.47277		1.76296
13.7278	1.14997	-10.4453		5.3413						8.47365	-0.217279	3.40671		1.56556
15.8057	1.2286	-12.2221		7.1968						4.53333	-0.218361	3.4621		2.4722
13.0512	1.21983	-11.2132		4.70714						-2.3202	-0.218819	3.37844		3.88615
12.3845	1.27125	-10.4329		5.31087						9.19742	-0.219973	3.37895		1.35576
13.1073	1.20331	-11.182		4.59024						3.57506	-0.20877	3.37487		2.62851
12.2413	1.20287	-12.2591		2.46562						4.80512	-0.21877	3.41062		2.35941
14.2998	1.18238	-12.679		4.22874						8.10927	-0.231427	3.39227		1.51557
12.4367	1.20356	-12.22		2.74844						3.27287	-0.227473	3.44717		2.70268
15.5949	1.18144	-10.7428		7.68166						1.85842	-0.214205	3.44589		3.04781
10.7717	1.22396	-11.0536		2.13048						7.195	-0.227274	3.41836		1.78313
13.8324	1.21668	-11.0016		5.82797						3.75162	-0.209867	3.35067		2.56333
11.8767	1.21493	-12.9137		1.51565						9.06763	-0.218138	3.39365		1.41565
13.9599	1.18795	-11.839		4.74474						6.11255	-0.222805	3.37034		2.00843
14.7681	1.18769	-12.1943		5.34569						3.82475	-0.203662	3.42454		2.64558
16.9758	1.18453	-11.7938		8.31462						2.28003	-0.222633	3.47649		2.96888
16.2278	1.25003	-12.3744		7.91095						7.13254	-0.216775	3.38175		1.83559
11.9647	1.20861	-11.792		2.66868						5.87308	-0.223478	3.32728		2.01477
16.9687	1.1583	-11.9114		7.74345						1.23483	-0.221163	3.44353		3.17043
14.11	1.19391	-11.527		5.31893						4.09878	-0.219527	3.41317		2.51338
14.8437	1.22778	-11.3624		6.86234						5.76544	-0.220825	3.41925		2.1461
11.1344	1.27578	-10.9207		3.2843						4.69802	-0.213818	3.35577		2.35125
14.1988	1.24649	-12.2034		5.49528						7.90311	-0.218806	3.45451		1.72526
14.186	1.22028	-11.4681		5.8428						4.13301	-0.217519	3.41042		2.51142
13.46	1.19904	-12.2147		3.92436						-0.94044	-0.220911	3.48448		3.69223
15.4919	1.18575	-13.3676		5.00179						5.22409	-0.227723	3.38731		2.19767
14.4292	1.20687	-11.316		6.09814						1.15715	-0.219441	3.40936		3.15543
13.6515	1.16397	-11.2095		4.68035						3.52686	-0.21692	3.42278		2.65773
14.8385	1.16048	-11.6028		5.61697						7.9621	-0.210599	3.43983		1.76302
16.6141	1.19518	-11.0153		8.8415						2.10826	-0.218527	3.43347		2.97276
13.6291	1.24289	-11.9349		5.00462						5.36774	-0.222221	3.448		2.25517
15.0528	1.16187	-12.9171		4.57225						5.00963	-0.209486	3.38103		2.33158
15.8207	1.25664	-10.583		9.29785						0.597894	-0.214069	3.47285		3.34486
12.8928	1.2035	-12.3285		3.18804						4.12547	-0.218022	3.41755		2.51811
14.5407	1.16256	-9.84143		7.06298						2.50791	-0.215574	3.45478		2.91414
15.6623	1.25866	-11.5169		8.19659						6.56694	-0.212638	3.45108		2.0547
12.7563	1.19506	-11.7053		3.53932						5.71227	-0.218496	3.38911		2.141
15.8609	1.19169	-11.7953		7.10604						5.50344	-0.213835	3.35888		2.18205
14.8598	1.19751	-12.2048		5.58991						8.03448	-0.220377	3.43347		1.66285
10.5126	1.20804	-11.6755		1.02423						9.10689	-0.216205	3.37812		1.40916
11.2793	1.13304	-12.4534		0.326511						6.24238	-0.222143	3.39514		2.00844
13.7202	1.19422	-11.04		5.3448						8.06743	-0.22261	3.43681		1.64092
13.3269	1.13276	-11.4822		3.61397						8.70185	-0.21132	3.40712		1.56824
15.7447	1.23338	-12.1229		7.29633						5.28279	-0.221749	3.4565		2.28504
12.9107	1.21964	-11.772		3.97445						7.15511	-0.211417	3.40213		1.88942
14.9048	1.24535	-12.7074		5.85426						7.33973	-0.210081	3.35141		1.80947
13.2789	1.25361	-11.8433		4.80339						4.39878	-0.205366	3.40518		2.50182
12.361	1.19789	-10.9233		3.88395						5.97349	-0.225013	3.41733		2.07322
17.7019	1.14198	-10.4263		9.78901						7.51477	-0.223644	3.45343		1.77279
14.7283	1.20562	-11.5415		6.21536						4.361	-0.228473	3.3893		2.39293
13.3464	1.19245	-10.3206		5.59427						6.05669	-0.201727	3.42992		2.20812
13.628	1.19612	-11.0093		5.29137						2.55827	-0.21596	3.36818		2.8157
18.6955	1.24402	-10.3619		12.8957						3.81813	-0.217359	3.43991		2.61
11.34	1.13681	-12.0521		0.839334						2.39744	-0.218539	3.38503		2.86109
14.4026	1.18595	-11.0292		6.05157						1.95991	-0.213608	3.39859		2.97994
15.9002	1.18388	-11.7718		7.05222						6.05726	-0.219812	3.45646		2.125
14.4942	1.1794	-10.9869		6.10765						4.66023	-0.223637	3.43384		2.39164
15.6139	1.20021	-10.0413		8.69864						5.0057	-0.223906	3.42358		2.30278
15.0603	1.22566	-11.5166		6.94215						6.73253	-0.209191	3.46183		2.05344
15.1448	1.1979	-9.92883		8.21312						2.37813	-0.219398	3.42717		2.90541
15.8058	1.18949	-11.9197		6.88108						3.86305	-0.222899	3.42735		2.56628
13.7643	1.22794	-10.9878		5.91396						6.88943	-0.212239	3.36726		1.90506
15.3064	1.28365	-12.8453		6.8028						4.54594	-0.223499	3.42235		2.40633
17.0023	1.17933	-13.2389		6.81235						1.05865	-0.220549	3.41277		3.17928
14.0518	1.21059	-11.5867		5.4243						6.05701	-0.210699	3.35744		2.08124
12.4555	1.24934	-11.1192		4.44198						7.8806	-0.217141	3.48304		1.77183
13.7596	1.20632	-11.399		5.19947						4.21532	-0.223352	3.34576		2.40427
12.0497	1.1667	-11.3784		2.67994						6.53176	-0.211552	3.49001		2.1082
12.2161	1.16813	-10.5676		3.70236						10.3795	-0.226738	3.39065		1.03721
11.9215	1.26213	-10.7382		4.30832						7.76808	-0.21947	3.3548		1.64993
15.8084	1.18992	-12.1569		6.65392						6.7441	-0.222413	3.44962		1.94964
11.846	1.20094	-10.0685		4.15789						10.3774	-0.218698	3.38297		1.11346
12.2274	1.1536	-10.9036		3.20188						1.98395	-0.221617	3.33363		2.89396
9.27147	1.24842	-12.2514		-0.676683						7.50763	-0.208304	3.3091		1.74524
16.0588	1.182	-10.8277		8.15378						9.71487	-0.219013	3.40276		1.27508
15.4503	1.19847	-12.0429		6.47389						12.1556	-0.220536	3.39348		0.712735
12.4492	1.15793	-11.7075		2.70787						2.67177	-0.220267	3.36994		2.78143
15.1924	1.17376	-10.9884		6.84393						5.02299	-0.223888	3.4294		2.30481
11.4239	1.20764	-11.6048		2.19108						8.34785	-0.210839	3.42947		1.66942
13.1976	1.22374	-10.3063		5.84417						6.43665	-0.21587	3.40338		2.0139
18.2022	1.23799	-11.6726		10.8615						4.88869	-0.224599	3.49312		2.39513
14.1131	1.17021	-10.5856		5.92964						4.56836	-0.216013	3.40259		2.41576
9.95901	1.18179	-11.5834		0.186015						11.5109	-0.218504	3.36952		0.854345
12.963	1.22556	-12.5809		3.30599						6.69972	-0.220063	3.3982		1.92384
13.8562	1.24705	-11.7626		5.51683						2.44852	-0.218221	3.38047		2.84615
14.571	1.19537	-11.5303		5.88739						5.96941	-0.214056	3.48751		2.20972
11.7128	1.26051	-11.1134		3.65075						4.70122	-0.224003	3.40749		2.3544
18.2145	1.25893	-11.9089		11.0219						4.8444	-0.21462	3.38311		2.34341
13.2461	1.2774	-11.4899		5.43057						9.56449	-0.221161	3.44306		1.32777
11.2454	1.19964	-10.9821		2.50827						7.6868	-0.224559	3.3818		1.65566
11.4877	1.13836	-10.5319		2.54517						6.09368	-0.217632	3.41389		2.08772
14.573	1.21888	-11.0809		6.6819						4.29279	-0.215415	3.5069		2.58216
14.1133	1.20742	-12.8599		4.18074						6.30337	-0.216811	3.46502		2.09838
11.943	1.22315	-11.4122		3.19588						4.60024	-0.217864	3.47334		2.47111
16.3577	1.24161	-12.9368		7.37314						-0.474268	-0.220012	3.42287		3.52721
15.267	1.1915	-10.8017		7.3889						7.69484	-0.222473	3.4631		1.75121
12.999	1.22049	-11.0898		4.77543						6.04124	-0.222884	3.38775		2.04126
13.05	1.22048	-9.79175		6.13543						3.30623	-0.219565	3.43566		2.70973
13.9123	1.20613	-11.2278		5.55234						4.82947	-0.22545	3.39195		2.30315
13.1631	1.22984	-11.1584		5.03016						4.30382	-0.222635	3.48341		2.52523
17.0757	1.21611	-11.3621		9.40388						6.98438	-0.223622	3.36876		1.8069
10.4464	1.20448	-12.4364		0.145963						-0.480687	-0.206932	3.46225		3.56172
11.3275	1.20289	-10.5897		3.03604						3.04371	-0.212811	3.37599		2.72826
15.1102	1.19372	-11.4994		6.53807						2.52732	-0.221776	3.45125		2.89076
16.0956	1.20184	-12.4541		6.89022						7.89012	-0.218632	3.4364		1.71137
15.4144	1.20588	-10.676		7.91197						4.64614	-0.218535	3.46847		2.45312
12.1288	1.23096	-13.312		1.618						2.88566	-0.218577	3.45823		2.82749
13.3975	1.16626	-12.0848		3.54009						5.8366	-0.217975	3.34649		2.07426
16.3475	1.1699	-11.7817		7.34314						6.15015	-0.20681	3.40686		2.13495
12.8869	1.1342	-12.3925		2.22382						4.25535	-0.221294	3.46242		2.52074
13.6561	1.13702	-12.6807		2.84659						6.47852	-0.229774	3.36675		1.87815
15.8526	1.22305	-10.5666		8.822						5.03434	-0.224508	3.40928		2.27903
10.3297	1.17523	-12.0861		0.0537583						9.30414	-0.207339	3.38045		1.45134
15.5809	1.18813	-12.09		6.42213						7.96073	-0.213316	3.42938		1.73123
13.4433	1.19428	-11.5211		4.53404						4.31462	-0.218662	3.46105		2.51761
9.85089	1.22664	-11.7549		0.328594						6.98393	-0.225461	3.36615		1.79155
14.8828	1.14529	-11.5714		5.47366						4.7715	-0.215105	3.44305		2.41668
13.5114	1.2059	-10.9895		5.30388						9.6326	-0.211666	3.40161		1.36271
17.1896	1.19318	-11.242		9.26827						1.92593	-0.213864	3.44383		3.03194
14.7152	1.27908	-11.9774		6.84442						4.19374	-0.228978	3.44432		2.48405
14.8457	1.1946	-11.5089		6.2257						2.86539	-0.226777	3.47599		2.82619
11.3661	1.20867	-11.6057		2.13217						9.28176	-0.210044	3.37685		1.42728
15.2284	1.28913	-11.1276		8.50378						8.68171	-0.223053	3.37872		1.44225
13.7499	1.17808	-12.1918		4.00675						5.64032	-0.214806	3.49697		2.2854
15.0614	1.2387	-10.8376		7.81904						5.88227	-0.221208	3.38951		2.0883
14.152	1.1678	-12.4476		4.07903						4.60591	-0.222945	3.43035		2.40349
14.6021	1.23125	-12.3616		5.61722						6.79042	-0.213245	3.3764		1.92838
13.7584	1.16748	-11.1184		4.94428						7.46265	-0.217957	3.39485		1.76831
11.9629	1.19774	-12.1719		2.15662						7.78093	-0.219871	3.38279		1.67198
14.1124	1.19572	-10.5449		6.32961						5.59745	-0.212739	3.45615		2.26535
17.1411	1.20515	-9.91492		10.7427						7.12082	-0.22167	3.32813		1.74966
15.8303	1.21994	-11.8293		7.48278						8.91731	-0.223499	3.42412		1.43111
11.1545	1.23528	-11.7919		1.98697						4.76306	-0.213254	3.44577		2.43003
16.0314	1.23397	-11.2515		8.53074						4.35162	-0.216457	3.49215		2.55021
14.1294	1.20506	-10.4587		6.56807						7.15849	-0.210762	3.3333		1.82457
11.1759	1.24434	-11.7043		2.20234						2.89951	-0.22704	3.39624		2.73794
14.2136	1.22535	-11.0101		6.40651						0.674357	-0.219863	3.42326		3.27499
18.0685	1.22128	-11.519		10.5477						4.02782	-0.216252	3.36738		2.49635
11.9214	1.17789	-11.6937		2.34838						-0.472028	-0.21636	3.39173		3.49386
12.654	1.18434	-11.4233		3.56331						4.19225	-0.213411	3.42058		2.52591
9.3283	1.2385	-12.7365		-1.18348						6.32874	-0.219635	3.42829		2.03828
13.7638	1.20512	-11.8445		4.74256						6.59414	-0.221596	3.39009		1.92885
11.5587	1.24331	-11.6517		2.7193						3.63304	-0.215661	3.44803		2.66453
15.3373	1.16991	-12.753		5.19022						4.95651	-0.213521	3.34134		2.28302
12.8585	1.17908	-10.9517		4.20957						9.90988	-0.215556	3.48179		1.34566
15.5891	1.24525	-10.2166		9.19573						4.36561	-0.23012	3.476		2.47139
13.627	1.19468	-11.3485		4.93155						5.1905	-0.222058	3.42289		2.2703
13.4863	1.23145	-12.0203		4.58733						7.98588	-0.218401	3.41289		1.66877
17.3137	1.16311	-11.7191		8.41867						1.93846	-0.2249	3.4053		2.96934
16.1856	1.18093	-12.4633		6.65075						7.15842	-0.211941	3.40427		1.88711
9.25082	1.13408	-11.4068		-0.915611						4.30825	-0.216164	3.43233		2.50104
10.3615	1.18058	-12.3852		-0.152678						5.29058	-0.205605	3.45181		2.36405
17.0955	1.19836	-10.8261		9.66042						3.24745	-0.215629	3.5347		2.83446
12.9125	1.19492	-11.5231		3.90631						8.80194	-0.212182	3.42943		1.56181
11.8683	1.14807	-11.8633		1.76236						4.46224	-0.217447	3.36294		2.39264
12.9767	1.19629	-13.4043		2.11965						-0.888746	-0.216459	3.37305		3.56542
12.8873	1.15732	-11.1286		3.78613						2.35908	-0.211607	3.35167		2.85247
14.4176	1.21524	-10.7517		6.76912						5.49451	-0.217558	3.46165		2.26628
14.4318	1.23858	-11.8464		6.02843						5.78234	-0.222185	3.46671		2.18196
15.4172	1.23248	-10.594		8.4074						4.5809	-0.218286	3.39585		2.39591
15.0033	1.27919	-12.2653		6.9268						0.655611	-0.212823	3.42108		3.28155
12.1527	1.21694	-13.5797		1.20941						5.25993	-0.222111	3.37582		2.20753
16.1212	1.17285	-11.1788		7.72883						5.21876	-0.211924	3.4597		2.35372
13.1332	1.19179	-11.5466		4.10546						4.85447	-0.210007	3.36985		2.35038
13.95	1.13748	-10.9256		4.94224						6.45035	-0.217856	3.47753		2.07228
17.7081	1.22897	-12.0385		9.7242						6.18902	-0.207081	3.39533		2.1137
13.5576	1.16715	-11.3866		4.43724						4.26933	-0.210264	3.43314		2.53545
13.8259	1.15995	-11.3879		4.64933						1.61669	-0.208359	3.46302		3.12617
12.4964	1.2442	-11.1412		4.4069						3.82206	-0.203126	3.33767		2.56131
15.1728	1.19669	-12.1428		6.01439						7.28697	-0.21632	3.39956		1.82325
15.3921	1.24934	-10.285		8.94494						4.84119	-0.225939	3.41936		2.32554
12.0923	1.20524	-11.4429		3.13124						5.91956	-0.2192	3.35435		2.05679
13.8369	1.2133	-12.4283		4.35992						5.33037	-0.220672	3.35977		2.18351
13.767	1.21404	-11.0399		5.67382						4.51918	-0.218946	3.51813		2.52867
13.1766	1.22404	-12.0147		4.11397						7.08847	-0.218493	3.42289		1.8741
15.5177	1.23024	-12.8018		6.28862						6.31872	-0.21224	3.34392		2.00283
12.2196	1.12185	-11.4198		2.28874						4.14931	-0.218638	3.46294		2.55574
15.1204	1.21253	-12.5827		5.75141						3.56848	-0.214676	3.49297		2.7269
17.0646	1.19148	-12.1148		8.21745						3.12576	-0.209342	3.42429		2.76994
14.6569	1.23596	-11.9782		6.13709						4.79348	-0.212537	3.41625		2.39745
14.7826	1.21912	-11.7689		6.25288						7.19518	-0.213509	3.43111		1.89488
16.4108	1.19379	-11.7369		7.85419						4.71234	-0.22033	3.50011		2.46184
14.1179	1.27237	-12.1922		5.77101						1.73505	-0.220284	3.42844		3.04624
12.7902	1.26837	-10.7599		5.4628						7.52645	-0.21489	3.49631		1.87895
12.3634	1.17642	-11.0253		3.51924						5.61274	-0.206764	3.39353		2.23302
16.2385	1.24895	-11.0238		9.25737						7.1092	-0.219446	3.42232		1.86224
15.158	1.22943	-10.8705		7.76521						4.33438	-0.223131	3.37531		2.40818
13.8074	1.2028	-12.316		4.2915						2.11004	-0.213058	3.45104		3.00148
11.6718	1.2039	-12.3643		1.6873						6.72264	-0.22459	3.41518		1.90534
15.7797	1.17438	-12.1862		6.34518						9.25533	-0.220021	3.46383		1.42746
17.2965	1.26794	-12.0528		9.87815						0.720423	-0.215989	3.41761		3.26201
11.2365	1.13829	-12.0446		0.745875						5.31173	-0.21402	3.37148		2.23467
12.7327	1.18764	-10.2729		4.84902						0.31201	-0.211908	3.37431		3.30819
12.0124	1.21085	-11.4659		3.07926						7.08595	-0.224363	3.39137		1.80155
13.6998	1.26727	-12.0121		5.34925						-1.51448	-0.213338	3.47376		3.79686
12.8094	1.15653	-11.4072		3.40728						5.60573	-0.211026	3.38867		2.20572
15.8539	1.18793	-11.8317		7.00147						7.07379	-0.213213	3.45861		1.95038
15.2859	1.20033	-11.7014		6.64677						6.62278	-0.215205	3.46429		2.03903
14.0792	1.17791	-12.6176		3.96644						7.38082	-0.217319	3.45987		1.85587
11.1582	1.22918	-11.4931		2.22235						5.69025	-0.217329	3.42215		2.18549
15.3676	1.2493	-12.4099		6.78893						7.46258	-0.212784	3.44763		1.85972
13.4195	1.17052	-11.4634		4.24431						10.5546	-0.213772	3.43434		1.17807
15.1731	1.17951	-11.3762		6.5206						3.8086	-0.204625	3.44603		2.6667
16.2746	1.16207	-11.9707		6.94149						7.92274	-0.210518	3.45209		1.7842
16.0276	1.19155	-10.6922		8.40541						7.65104	-0.225394	3.37708		1.65258
15.4577	1.21498	-10.5955		8.18532						4.5098	-0.218181	3.41834		2.43438
14.002	1.24477	-11.6564		5.77286						3.52201	-0.217958	3.38571		2.61806
12.3179	1.17055	-12.5134		1.90538						10.1181	-0.217645	3.37266		1.17051
14.2421	1.18389	-12.3542		4.50689						7.89916	-0.217446	3.41493		1.69729
16.5595	1.18207	-10.1133		9.46121						10.1453	-0.226632	3.50735		1.20809
12.8088	1.15251	-11.4551		3.30717						6.73816	-0.225639	3.40742		1.88702
11.2436	1.25148	-11.6248		2.44641						9.99322	-0.214172	3.39024		1.24997
13.7933	1.24095	-11.826		5.29072						9.41405	-0.218732	3.47531		1.41615
13.0714	1.14604	-11.3717		3.60866						6.18155	-0.210648	3.45819		2.15606
12.8203	1.19131	-11.8236		3.4493						3.54756	-0.224293	3.4806		2.68491
17.744	1.19052	-11.2013		9.92333						6.67431	-0.212178	3.40324		1.9871
17.036	1.20949	-11.7434		8.86142						5.34707	-0.218358	3.3673		2.19972
13.1783	1.23547	-11.8602		4.42114						0.510733	-0.211868	3.42943		3.32122
13.9239	1.17502	-11.9298		4.43108						7.16751	-0.214446	3.31998		1.78293
13.5624	1.23198	-12.4352		4.27333						5.61035	-0.223899	3.44619		2.19004
16.9383	1.23759	-11.6755		9.28713						3.75491	-0.215738	3.37653		2.56645
15.5133	1.26062	-10.4888		9.06759						2.18686	-0.219331	3.38302		2.90337
16.7505	1.17506	-12.6013		7.08148						7.20602	-0.212241	3.42994		1.90052
15.49	1.23012	-11.9537		7.10086						6.49323	-0.218645	3.52249		2.10278
12.8759	1.21964	-12.1371		3.56689						8.72135	-0.216601	3.34144		1.45239
10.7723	1.16595	-10.5771		1.98284						3.10524	-0.22188	3.5067		2.81771
13.9705	1.22374	-10.9954		6.10087						9.16846	-0.212067	3.39337		1.44904
13.8333	1.22703	-10.485		6.48884						5.41459	-0.223331	3.41613		2.20689
13.1171	1.17298	-11.7063		3.67969						2.88022	-0.211399	3.45067		2.8418
12.7837	1.13974	-11.5375		3.03255						6.82156	-0.214117	3.39533		1.93471
14.8655	1.16773	-12.4546		4.90429						3.08998	-0.219641	3.44746		2.76877
16.4747	1.20309	-12.2084		7.61205						4.95659	-0.228098	3.36702		2.23644
11.8115	1.17884	-12.5989		1.32496						6.58255	-0.222999	3.48684		2.01893
8.92285	1.21831	-10.6708		0.200002						6.20753	-0.212132	3.45293		2.13612
16.6567	1.17146	-11.1983		8.31435						7.43607	-0.217184	3.38263		1.76764
15.5997	1.21161	-12.0842		6.8165						6.50463	-0.22309	3.36806		1.91694
13.8502	1.19048	-11.2222		5.26618						9.05167	-0.213894	3.43533		1.49924
15.6067	1.22623	-11.6559		7.48149						1.87024	-0.228451	3.44167		3.01441
12.3249	1.2173	-12.4491		2.55397						5.05355	-0.210962	3.42048		2.35438
17.6205	1.21512	-11.7738		9.6372						6.94985	-0.210443	3.42151		1.95897
12.92	1.17346	-10.5193		4.64189						3.41503	-0.206913	3.46835		2.76174
14.8807	1.15143	-12.0954		5.03859						4.57124	-0.221651	3.44003		2.42681
15.4678	1.17805	-11.9763		6.24547						0.481661	-0.217002	3.37641		3.27189
11.9068	1.2194	-11.0484		3.47073						0.989956	-0.217472	3.55862		3.34333
13.8239	1.2027	-11.9112		4.71481						3.65514	-0.216825	3.34405		2.55152
14.6367	1.21104	-11.3781		6.3475						2.32019	-0.220723	3.42773		2.91561
11.8032	1.20742	-10.1657		4.08573						3.08306	-0.216581	3.36926		2.70152
13.1175	1.20616	-11.3336		4.48825						4.26578	-0.208762	3.43138		2.54085
13.7639	1.20995	-10.6155		6.03809						3.08276	-0.218208	3.4587		2.78602
11.4723	1.13637	-11.278		1.75877						5.22685	-0.215368	3.40068		2.27498
15.721	1.24451	-11.7031		7.86191						1.62641	-0.227659	3.43897		3.0687
11.5224	1.18286	-11.1116		2.51775						7.08061	-0.222367	3.39252		1.81802
16.0094	1.23406	-12.8446		6.91192						7.03148	-0.220626	3.42963		1.8783
14.6398	1.22617	-10.4916		7.45928						6.17008	-0.224589	3.41906		2.03333
14.0013	1.21098	-12.0123		4.9429						3.63195	-0.214378	3.43629		2.65768
15.3171	1.18807	-12.1021		6.09565						6.18186	-0.220243	3.40993		2.04842
15.0051	1.13632	-12.5598		4.49075						7.87775	-0.221202	3.4064		1.66382
14.7966	1.17998	-12.8698		4.58997						5.51135	-0.220235	3.44686		2.23307
13.2734	1.26435	-11.8948		4.88741						7.49699	-0.226068	3.42012		1.7253
17.2693	1.19549	-10.5618		10.0834						1.36869	-0.216175	3.33311		3.03724
14.0584	1.23435	-11.579		5.77406						2.44964	-0.217355	3.54036		3.00792
13.9	1.13066	-12.3479		3.36823						6.06124	-0.220621	3.44103		2.1038
15.3693	1.13404	-12.0405		5.38895						2.18088	-0.223108	3.43902		2.95245
15.1757	1.16718	-12.3064		5.40636						3.58256	-0.218521	3.44477		2.6619
11.2703	1.14507	-11.7696		1.13569						7.61646	-0.214928	3.48763		1.85064
15.076	1.15003	-11.7617		5.57608						8.36387	-0.222777	3.46249		1.59921
15.3561	1.21372	-11.3262		7.31181						8.64828	-0.214249	3.39975		1.54687
11.5743	1.2229	-11.1925		2.96171						5.87705	-0.210275	3.42516		2.18936
14.2706	1.24704	-13.0958		4.7003						6.55942	-0.223045	3.49962		2.03657
10.105	1.22507	-11.5828		0.796535						10.3267	-0.212437	3.38391		1.19015
9.30971	1.22098	-11.624		-0.257018						4.99645	-0.21353	3.40445		2.33756
12.4835	1.20556	-11.2458		3.8038						6.03552	-0.225057	3.4105		2.05217
15.248	1.14757	-11.8391		5.65904						1.84079	-0.216172	3.46809		3.07016
11.1503	1.22081	-11.2138		2.39855						4.59598	-0.221215	3.44832		2.43163
13.5712	1.18391	-10.8414		5.2257						4.32911	-0.217501	3.41035		2.46877
13.6485	1.22269	-11.2403		5.44769						5.03497	-0.214001	3.41529		2.3378
14.5522	1.20256	-10.9269		6.57299						11.9276	-0.221953	3.35792		0.710554
16.7176	1.25565	-12.4603		8.53117						5.44033	-0.216631	3.43074		2.2522
14.6379	1.20885	-12.4454		5.24961						6.89168	-0.217877	3.39354		1.892
10.9399	1.2487	-12.0633		1.59738						-0.781581	-0.214296	3.40279		3.57028
12.3205	1.20318	-12.9494		1.87435						6.11534	-0.227728	3.39486		2.00222
13.8826	1.21373	-11.7826		5.06711						4.03076	-0.216724	3.38342		2.50986
13.2618	1.19272	-11.0924		4.72513						9.95198	-0.214016	3.401		1.27112
16.4205	1.16611	-10.8703		8.27775						0.569052	-0.218937	3.49214		3.36755
14.5976	1.13501	-10.1522		6.41611						5.65368	-0.217415	3.33624		2.10704
13.6339	1.21319	-11.7566		4.78393						12.8273	-0.220193	3.40345		0.578974
17.5957	1.21153	-9.96421		11.3536						6.26851	-0.221361	3.41694		2.02934
13.1509	1.17277	-11.4336		3.98938						8.02032	-0.218986	3.45316		1.69682
12.8438	1.19676	-11.9225		3.44852						7.69105	-0.221136	3.43036		1.72959
15.3889	1.25134	-11.6965		7.56025						0.488037	-0.217361	3.37616		3.27008
13.8121	1.21159	-12.6115		4.12318						2.04656	-0.218127	3.44587		2.99946
12.1482	1.15813	-12.0726		1.99659						9.02112	-0.215122	3.46305		1.52241
13.0649	1.22856	-12.2106		3.84037						1.37541	-0.214183	3.45266		3.15807
14.4239	1.21555	-12.1971		5.33578						6.1681	-0.22296	3.40226		2.02702
15.1259	1.21246	-12.0642		6.27546						2.72932	-0.215139	3.4405		2.85331
18.4649	1.24323	-11.3841		11.5719						5.31127	-0.210751	3.39547		2.27612
15.6718	1.16431	-11.0983		7.14848						4.87897	-0.214029	3.35762		2.31338
9.27336	1.26314	-11.4773		0.236253						1.6714	-0.225764	3.4203		3.04296
19.9632	1.1834	-11.7671		11.8573						4.99268	-0.230659	3.41167		2.26006
14.271	1.23594	-13.0388		4.59929						4.13432	-0.216933	3.43501		2.53814
13.6716	1.16058	-11.3618		4.5051						7.23018	-0.215393	3.42411		1.86678
9.51936	1.23733	-10.7297		1.04894						2.19824	-0.215817	3.39485		2.92043
15.89	1.18578	-11.9487		6.89339						9.62229	-0.217059	3.41028		1.32167
11.5818	1.212	-11.9043		2.13294						4.77102	-0.221836	3.43969		2.3813
12.9116	1.20205	-11.4821		4.03835						4.88302	-0.217284	3.37002		2.30901
13.5113	1.17784	-11.5416		4.37257						2.84612	-0.225513	3.44121		2.79938
16.9499	1.18304	-12.4318		7.62062						-0.0479516	-0.215671	3.35256		3.3629
16.0723	1.25692	-12.4465		7.75497						5.51913	-0.21574	3.40153		2.21083
14.2268	1.21914	-11.1896		6.1548						6.84504	-0.221189	3.35391		1.83986
16.1095	1.18632	-12.2687		6.84223						4.70373	-0.219857	3.47101		2.43686
15.1609	1.15858	-10.3606		7.20453						6.68585	-0.215072	3.44089		2.00295
15.548	1.27686	-12.0057		7.84689						-1.86052	-0.212868	3.46138		3.85743
11.6933	1.25508	-11.3666		3.30947						5.60931	-0.21063	3.41165		2.23015
13.8351	1.2463	-10.845		6.39767						4.09215	-0.227175	3.40928		2.47965
10.8825	1.20648	-12.9785		0.151047						8.16285	-0.216246	3.48983		1.72465
16.5819	1.24122	-11.7692		8.81243						10.2599	-0.208861	3.40071		1.25782
12.1824	1.204	-11.5673		3.10037						6.77547	-0.217116	3.47949		2.00843
13.3086	1.20609	-12.7304		3.32096						8.0412	-0.213655	3.42163		1.70359
12.339	1.18476	-11.4781		3.14055						3.08786	-0.222595	3.49028		2.80294
12.6949	1.16719	-10.803		4.01443						11.673	-0.215227	3.41487		0.90252
13.4129	1.18853	-11.0167		4.92488						6.76857	-0.216557	3.43262		1.96684
17.9876	1.27307	-11.5527		11.3468						9.92112	-0.206152	3.43243		1.38718
13.5151	1.17742	-10.8295		5.08358						5.25996	-0.218878	3.44745		2.29616
9.65544	1.23803	-12.7293		-0.775525						8.1013	-0.221641	3.45115		1.65557
13.219	1.22061	-11.3008		4.83438						1.43646	-0.216559	3.42794		3.11686
18.0941	1.15522	-11.2714		9.63126						4.76204	-0.212535	3.45883		2.44673
17.2236	1.18322	-9.98218		10.3971						9.25966	-0.209793	3.36914		1.42652
13.48	1.19655	-9.91352		6.21601						7.98477	-0.219766	3.37673		1.62195
13.2833	1.21613	-12.3948		3.75942						4.9652	-0.218552	3.37158		2.28643
16.1025	1.2667	-11.3177		9.07931						4.60858	-0.215295	3.41491		2.4227
15.0562	1.18497	-9.94903		7.89215						2.76991	-0.228317	3.40478		2.77236
14.1194	1.20528	-10.83		6.18784						8.26745	-0.212032	3.43818		1.68521
16.0377	1.19216	-11.435		7.68439						6.89661	-0.219758	3.47162		1.95604
12.4978	1.23464	-10.7919		4.63838						3.74691	-0.208121	3.43491		2.6551
13.4689	1.25162	-12.5668		4.29112						5.30178	-0.223182	3.4233		2.24003
15.2794	1.20078	-12.8198		5.52739						2.68101	-0.222156	3.43799		2.84239
12.328	1.26472	-11.1075		4.48401						4.57809	-0.213659	3.41277		2.43462
15.3102	1.24486	-10.2655		8.79346						6.99295	-0.221767	3.41238		1.86158
12.6538	1.2063	-11.1469		4.11735						3.26924	-0.214378	3.43936		2.73851
12.3927	1.15877	-11.6597		2.70064						5.84032	-0.214284	3.48247		2.23099
12.7935	1.26937	-10.7983		5.44134						4.97167	-0.211822	3.42424		2.37113
11.6106	1.21882	-10.3507		3.80048						6.66489	-0.214707	3.43712		2.00612
15.739	1.17905	-10.4476		8.10954						6.00827	-0.218711	3.4567		2.14263
15.8007	1.21742	-11.8084		7.42766						3.0016	-0.215061	3.34652		2.701
17.0777	1.15729	-12.0348		7.72906						-0.451715	-0.219898	3.39239		3.49173
17.1294	1.15528	-12.098		7.69123						11.6062	-0.217954	3.36695		0.837329
10.4184	1.18635	-10.0827		2.27731						4.66582	-0.218763	3.41537		2.39467
14.3441	1.24028	-10.4096		7.38106						8.14803	-0.219615	3.4557		1.66627
13.9368	1.21499	-11.3679		5.56507						4.66514	-0.217363	3.42136		2.40734
16.2227	1.2172	-11.376		8.37021						11.4551	-0.214381	3.48925		1.0335
14.802	1.21656	-11.4833		6.52417						1.83345	-0.220902	3.42082		3.01581
12.3805	1.21337	-11.0485		3.97367						2.70519	-0.218489	3.39065		2.7996
12.8507	1.17347	-11.5839		3.49595						2.42178	-0.22023	3.38928		2.85593
12.9274	1.18985	-11.0913		4.29038						8.1094	-0.218588	3.39898		1.62636
11.2183	1.26774	-11.5719		2.64993						5.55502	-0.215376	3.41034		2.21392
9.72063	1.24743	-10.9823		1.14348						3.89769	-0.209934	3.38844		2.57018
9.22172	1.20583	-11.0155		0.104321						7.78405	-0.215467	3.36615		1.68894
14.811	1.21264	-11.6017		6.35872						0.375712	-0.2184	3.49199		3.40994
10.5621	1.28828	-11.5933		2.01369						5.58837	-0.210449	3.38493		2.20886
17.9962	1.20695	-10.8741		10.8465						3.28318	-0.220999	3.36998		2.6444
17.5101	1.18602	-12.7615		8.00585						6.35019	-0.214202	3.43414		2.07391
13.174	1.2107	-12.1781		3.7717						4.07743	-0.225678	3.36307		2.44289
14.4958	1.23325	-10.2613		7.61572						4.85806	-0.219026	3.44689		2.38285
13.9301	1.16792	-10.8836		5.3857						3.9342	-0.221978	3.35544		2.48213
14.8952	1.20248	-11.0127		6.89845						6.37705	-0.230184	3.48688		2.01898
16.1949	1.20081	-12.7846		6.66235						7.9731	-0.213841	3.36649		1.66151
16.2843	1.24314	-11.9904		8.25323						6.44144	-0.219663	3.39939		1.98444
14.3804	1.18999	-10.9118		6.20077						5.41865	-0.219135	3.46299		2.27557
16.543	1.17045	-12.2183		7.14447						3.56993	-0.22309	3.42331		2.6269
16.3246	1.21547	-11.85		7.99193						7.9326	-0.215371	3.38689		1.67844
16.087	1.18472	-12.3301		6.72839						3.91364	-0.211337	3.3714		2.54431
12.103	1.21829	-11.9386		2.80636						4.15659	-0.210653	3.4743		2.59871
15.0862	1.23765	-10.8346		7.83681						6.77278	-0.210793	3.47974		2.05208
14.312	1.23646	-11.8943		5.80191						2.05136	-0.214898	3.39263		2.9518
13.9673	1.15787	-11.5375		4.63483						4.25851	-0.209419	3.378		2.48619
13.9781	1.18716	-10.5058		6.08839						8.94772	-0.219509	3.33001		1.3659
14.2093	1.19598	-10.3369		6.65712						10.579	-0.21414	3.41598		1.15061
12.8029	1.21726	-10.6698		4.91477						2.36899	-0.214832	3.38771		2.87878
11.0487	1.21939	-12.0377		1.435						4.95924	-0.213672	3.47527		2.41562
15.93	1.15587	-12.1947		6.21835						1.11918	-0.216924	3.4074		3.16463
10.9451	1.19456	-11.8079		1.26674						2.13893	-0.226852	3.4146		2.92938
13.5615	1.2216	-11.2607		5.30604						10.1259	-0.217235	3.37964		1.17993
12.4608	1.19125	-11.1452		3.69878						5.00122	-0.213572	3.45511		2.38699
12.9832	1.20349	-10.4521		5.17297						4.37383	-0.216511	3.36475		2.41777
15.6534	1.23091	-12.0853		7.1827						2.25707	-0.223867	3.46709		2.96181
13.0907	1.19781	-11.3571		4.32302						2.51267	-0.212922	3.41957		2.88457
16.9798	1.2354	-10.3727		10.6042						4.02233	-0.215622	3.36738		2.50008
16.46	1.18382	-10.0901		9.39548						7.20139	-0.210482	3.42929		1.91353
14.7626	1.16316	-11.646		5.52528						7.32031	-0.206676	3.43358		1.92065
13.0071	1.19177	-10.8838		4.61769						0.0678815	-0.217212	3.47632		3.46157
10.3912	1.25181	-11.7826		1.22528						9.94187	-0.215708	3.35776		1.21322
16.2972	1.22399	-12.2717		7.676						2.07322	-0.216253	3.44996		3.00162
15.5981	1.19917	-11.7452		6.95949						5.86435	-0.210533	3.41621		2.18158
14.904	1.18512	-9.67486		7.98811						1.48363	-0.217061	3.44927		3.12723
17.5473	1.15287	-10.1742		10.0555						7.90416	-0.217365	3.36409		1.64601
13.5262	1.14841	-11.9323		3.6014						3.99393	-0.222979	3.35372		2.46315
14.3451	1.24875	-11.3671		6.54637						3.79888	-0.221918	3.50285		2.65981
9.49086	1.2302	-11.8489		-0.173218						9.90226	-0.218082	3.43067		1.27116
12.744	1.19691	-11.3481		3.90536						3.07324	-0.21296	3.40027		2.74579
16.6605	1.2016	-11.2946		8.72451						-0.287055	-0.211185	3.40575		3.46637
15.8989	1.18218	-11.5025		7.29281						4.4904	-0.222727	3.47885		2.47871
15.5137	1.16658	-9.90354		8.19436						5.14547	-0.221383	3.40358		2.26446
17.1449	1.1595	-11.3378		8.54175						5.78432	-0.213737	3.40741		2.17109
11.0116	1.2023	-11.7262		1.51304						7.38535	-0.222738	3.42216		1.77716
17.169	1.21296	-10.4251		10.4002						4.18886	-0.225776	3.39198		2.44624
12.5272	1.2219	-11.3449		3.96208						4.391	-0.219186	3.4585		2.49605
13.9847	1.13613	-10.9426		4.94581						8.18487	-0.221872	3.37847		1.56247
15.283	1.21651	-11.5677		7.02418						4.94413	-0.214713	3.43227		2.3707
13.4754	1.21692	-12.8096		3.58891						5.63758	-0.213801	3.42011		2.21479
10.6886	1.1532	-10.8215		1.50459						3.18528	-0.224285	3.53164		2.81723
12.7314	1.14812	-10.0083		4.60889						8.75574	-0.226238	3.47706		1.49618
17.4141	1.18926	-10.8068		9.9032						1.43064	-0.218128	3.41592		3.10386
13.4809	1.17931	-11.9275		3.97058						7.39008	-0.207641	3.51201		1.97752
13.663	1.20194	-11.4292		4.99281						7.73077	-0.225209	3.34608		1.60503
12.6947	1.21548	-11.003		4.42708						6.79765	-0.21512	3.4455		1.98319
12.69	1.22531	-12.3805		3.16872						6.79564	-0.217291	3.41211		1.93547
17.1715	1.22244	-11.7181		9.27308						2.8666	-0.210898	3.38848		2.78392
13.7965	1.17768	-10.3335		5.91435						3.29091	-0.220074	3.39031		2.66607
15.5982	1.15547	-11.1172		6.90604						3.38048	-0.219618	3.39401		2.6516
8.93159	1.21255	-9.47255		1.35746						7.76246	-0.212898	3.3852		1.73259
12.4809	1.20945	-10.3602		4.73473						6.3612	-0.213846	3.46735		2.10702
12.4297	1.16653	-11.3564		3.14311						1.35404	-0.217457	3.43087		3.13643
13.9842	1.22673	-11.1293		6.02551						6.58319	-0.210355	3.44051		2.0557
13.4503	1.25042	-12.3798		4.43872						11.185	-0.215373	3.39202		0.983068
13.053	1.24691	-10.5349		5.74098						6.26391	-0.220257	3.3639		1.98424
16.9651	1.17421	-12.3022		7.61835						-0.662386	-0.221449	3.42623		3.57292
12.9133	1.18476	-11.2044		4.09479						2.66825	-0.219494	3.43029		2.84462
15.6998	1.20658	-10.2714		8.67173						2.75416	-0.216504	3.40302		2.80673
15.7628	1.20264	-11.6397		7.3172						6.89506	-0.213705	3.50526		2.03175
13.2368	1.2006	-12.4294		3.46271						5.92066	-0.224001	3.49434		2.16811
11.0263	1.15386	-11.3539		1.36884						8.60179	-0.216638	3.41679		1.55331
12.8746	1.18882	-12.9833		2.32217						3.31489	-0.217464	3.40015		2.67928
14.4729	1.11629	-11.8974		4.25851						8.88282	-0.206934	3.41527		1.57711
14.8034	1.18568	-11.8371		5.71505						2.49408	-0.224122	3.41453		2.85555
15.894	1.22568	-12.2965		7.18439						4.90506	-0.210344	3.40048		2.36873
12.8066	1.17826	-12.9576		2.13194						0.845928	-0.211208	3.45169		3.27302
15.6743	1.22374	-12.1629		7.01843						7.66917	-0.220503	3.44511		1.75404
14.8843	1.15625	-11.9939		5.21595						5.38939	-0.225206	3.47226		2.25854
13.9869	1.25097	-12.1983		5.29888						6.37962	-0.213316	3.42532		2.06445
13.6929	1.20922	-12.4286		4.12916						6.83501	-0.222075	3.4523		1.93441
14.2298	1.2116	-11.8243		5.41646						5.4307	-0.21099	3.44011		2.29429
11.7227	1.24191	-11.7266		2.83183						5.82849	-0.21947	3.4663		2.18712
13.7645	1.23438	-11.7485		5.24221						6.64445	-0.222255	3.39936		1.9226
13.2295	1.19701	-12.131		3.70488						5.60952	-0.219089	3.46022		2.23124
13.8418	1.18451	-11.7458		4.64984						3.3701	-0.216734	3.41425		2.68383
15.727	1.17769	-11.2545		7.26699						2.22111	-0.223342	3.4538		2.95773
14.9589	1.17427	-13.2529		4.31283						8.29365	-0.22876	3.48167		1.58442
17.5452	1.18853	-11.7129		9.14012						3.78381	-0.210918	3.39965		2.60158
14.3413	1.21708	-11.2024		6.25215						7.43498	-0.227745	3.38479		1.69151
12.9879	1.17683	-13.048		2.2366						10.3464	-0.221912	3.42174		1.12576
14.2975	1.2372	-9.79858		7.89031						8.29406	-0.213339	3.39892		1.62947
13.5569	1.21071	-11.3835		5.02993						5.46383	-0.226204	3.46644		2.2305
15.6129	1.22225	-12.6363		6.4465						7.02458	-0.212773	3.47248		1.97783
15.8645	1.16725	-11.2891		7.22865						6.05165	-0.220621	3.41472		2.0796
11.2555	1.16457	-10.6808		2.427						5.87678	-0.204657	3.42419		2.22147
12.9181	1.20104	-10.5116		5.00359						0.433635	-0.216515	3.44312		3.34923
16.5445	1.21434	-10.186		9.90472						5.06872	-0.22607	3.43504		2.28916
11.7991	1.25043	-11.6705		3.0834						10.2525	-0.223883	3.37563		1.08028
14.7682	1.20662	-12.3926		5.42699						5.79394	-0.220188	3.43078		2.15502
16.5635	1.23654	-11.1816		9.29987						4.88229	-0.214486	3.45354		2.40636
13.6804	1.20353	-11.4307		5.03414						4.70453	-0.212925	3.36968		2.36796
15.1007	1.15196	-11.6692		5.72621						6.37255	-0.216972	3.38213		1.99946
12.7313	1.215	-11.3183		4.15019						9.61894	-0.211407	3.37927		1.34576
14.3848	1.18759	-11.8835		5.19984						6.90055	-0.213556	3.36579		1.89214
18.2813	1.22404	-11.7475		10.6295						5.02302	-0.222379	3.43499		2.31797
14.4612	1.21642	-11.7567		5.8343						8.20114	-0.216896	3.41878		1.63999
15.8282	1.20761	-10.9702		8.14415						7.52981	-0.226772	3.39047		1.68292
12.6904	1.24047	-12.6605		3.08163						6.36839	-0.217513	3.35974		1.97454
16.5374	1.28287	-11.186		10.0293						3.35584	-0.22137	3.38189		2.63901
13.4997	1.17378	-12.1392		3.70639						6.6826	-0.223057	3.36941		1.87881
13.8719	1.20593	-12.768		3.96059						6.11999	-0.210644	3.45841		2.16927
13.2452	1.15317	-11.6465		3.62738						1.45013	-0.218584	3.51391		3.19693
15.9231	1.18944	-12.2166		6.72299						3.23935	-0.210583	3.42461		2.74246
9.43748	1.24589	-12.4832		-0.725124						2.75833	-0.21063	3.38683		2.80584
14.6209	1.18636	-11.3665		5.97908						6.97695	-0.221803	3.42436		1.87686
13.9703	1.23769	-11.2879		6.00293						0.449072	-0.216164	3.40931		3.31224
15.577	1.21092	-10.8698		7.99269						5.10729	-0.214753	3.42406		2.32725
14.8251	1.19152	-12.2603		5.40407						0.474897	-0.220632	3.4227		3.31792
15.4924	1.16078	-11.497		6.48623						5.097	-0.209226	3.41279		2.34636
15.2439	1.13791	-11.5957		5.75047						8.16439	-0.208351	3.44513		1.74407
14.6396	1.19932	-11.5932		5.96442						4.14676	-0.210467	3.40641		2.53365
18.0079	1.17719	-11.1403		10.0585						12.3862	-0.208457	3.49156		0.909565
12.7548	1.18105	-11.5381		3.52589						4.49467	-0.214389	3.32348		2.35987
13.675	1.19079	-11.7739		4.51023						6.70099	-0.218197	3.44322		1.98108
12.2529	1.24403	-12.1679		3.07505						5.13065	-0.22034	3.4712		2.34071
11.6803	1.20263	-12.5136		1.53354						3.42104	-0.226227	3.40819		2.63426
15.8503	1.23592	-11.8438		7.74596						4.90424	-0.215324	3.34197		2.28597
17.4032	1.19312	-12.3626		8.40141						3.66962	-0.219796	3.4147		2.60813
14.8437	1.14364	-12.3867		4.58914						2.60375	-0.216419	3.46529		2.90179
13.257	1.20882	-12.43		3.59538						4.29902	-0.220952	3.42037		2.47049
16.1478	1.24603	-10.0053		10.1154						2.04915	-0.217434	3.4836		3.03804
12.4759	1.20198	-12.215		2.78073						5.84936	-0.225778	3.36365		2.04299
12.6347	1.17906	-9.55227		5.34473						7.23551	-0.219843	3.40174		1.81106
11.2142	1.28263	-11.1593		3.22447						5.16653	-0.215913	3.42344		2.30792
12.3736	1.26227	-13.2411		2.37773						6.64738	-0.22251	3.43807		1.95896
13.4796	1.24987	-11.4864		5.36131						2.85044	-0.223475	3.38949		2.75249
13.7238	1.19693	-11.1645		5.2619						6.86424	-0.223898	3.49178		1.95489
13.7807	1.21118	-13.3455		3.3454						6.60545	-0.210716	3.43213		2.04025
13.3619	1.13913	-12.2802		2.94064						3.05997	-0.209167	3.37018		2.73014
13.6295	1.17661	-12.2896		3.74698						3.75581	-0.215174	3.42366		2.61551
13.0033	1.19891	-11.9251		3.66475						5.83964	-0.226462	3.37906		2.05661
14.8516	1.11564	-11.8467		4.72237						4.78481	-0.218193	3.44162		2.39761
17.7003	1.18188	-11.8141		9.10535						5.61068	-0.219233	3.44963		2.21959
15.5027	1.16806	-11.8951		6.21295						6.07719	-0.219375	3.40512		2.07194
15.3284	1.17607	-10.7679		7.2594						8.37919	-0.223786	3.4394		1.56425
12.2327	1.13192	-12.1638		1.68256						8.63321	-0.223523	3.41041		1.48069
17.1735	1.13544	-11.0247		8.47472						4.24563	-0.220279	3.35045		2.41522
15.9938	1.15402	-11.198		7.25909						6.51408	-0.215874	3.42942		2.0232
13.9283	1.23491	-12.0542		5.14598						2.14365	-0.215494	3.51092		3.04898
16.1815	1.18991	-11.5214		7.73318						4.22197	-0.216058	3.40494		2.49275
13.2013	1.18203	-11.0473		4.55704						5.94347	-0.222332	3.44105		2.11963
13.3397	1.2103	-12.7334		3.41162						4.29085	-0.225428	3.38378		2.4165
12.2635	1.25928	-13.1525		2.29069						3.60333	-0.222004	3.46527		2.66532
16.6785	1.17604	-10.783		8.83156						5.36666	-0.217933	3.35405		2.18448
14.1487	1.17794	-12.0184		4.64795						5.61369	-0.221411	3.31686		2.07393
12.2353	1.2431	-12.011		3.19868						9.5919	-0.219146	3.38942		1.2874
15.3254	1.19577	-11.5769		6.74877						10.0159	-0.227048	3.43306		1.15897
17.093	1.2286	-11.044		9.95643						5.79245	-0.227832	3.41268		2.09298
15.3268	1.23373	-11.9318		6.97736						6.20998	-0.217225	3.43369		2.08473
15.3277	1.14628	-10.4297		7.1403						7.29273	-0.222014	3.44122		1.82213
18.4551	1.19532	-11.3382		10.7215						2.796	-0.214509	3.45732		2.85755
14.0602	1.14338	-12.0104		4.06574						4.52833	-0.215973	3.4159		2.4379
13.626	1.24632	-11.6896		5.29266						6.73585	-0.216873	3.31946		1.85863
15.5809	1.26617	-12.2588		7.4693						5.03393	-0.214811	3.46344		2.38209
14.1363	1.27576	-12.0644		5.97009						4.01349	-0.21353	3.45986		2.60286
14.5326	1.1375	-11.7563		4.77457						5.5146	-0.226685	3.39192		2.14185
12.2246	1.19294	-11.7892		2.79401						6.6403	-0.214747	3.35642		1.93044
11.6997	1.22076	-12.6705		1.61199						6.42278	-0.222321	3.32796		1.90004
16.9714	1.22042	-12.3704		8.34194						4.48168	-0.219808	3.42682		2.44171
13.6634	1.17534	-11.2523		4.80685						3.3772	-0.218009	3.39232		2.65607
13.8813	1.20266	-10.399		6.29548						3.7212	-0.208496	3.45142		2.67556
11.597	1.23523	-13.4193		0.905693						1.34747	-0.21984	3.42302		3.1268
11.0954	1.18736	-11.7987		1.37553						0.124323	-0.225018	3.37393		3.34595
17.027	1.17834	-12.8567		7.20688						5.49283	-0.21806	3.3862		2.18844
14.4275	1.18917	-12.5679		4.58883						7.57164	-0.210898	3.39622		1.79938
14.4943	1.21615	-12.8467		4.78063						2.79172	-0.210096	3.46659		2.88006
15.4436	1.21852	-11.1255		7.69286						5.46727	-0.213834	3.4393		2.27021
12.5266	1.2704	-11.8771		4.03666						5.90213	-0.215107	3.39858		2.12899
15.8708	1.17895	-10.6172		8.09364						6.53292	-0.21496	3.37238		1.96806
12.0361	1.17881	-13.1757		1.01261						2.62179	-0.208909	3.46108		2.91336
12.9731	1.14282	-11.1959		3.63003						5.52028	-0.231184	3.43647		2.16026
15.0251	1.22929	-10.2693		8.20092						5.20851	-0.21699	3.387		2.2568
14.4471	1.20163	-11.8438		5.51631						7.13139	-0.221608	3.42474		1.84436
13.8548	1.18775	-9.83017		6.62587						4.16171	-0.212391	3.33948		2.45557
16.1535	1.21709	-12.013		7.64721						5.55584	-0.221238	3.45866		2.2295
11.8501	1.3005	-11.0321		4.37894						6.55219	-0.217841	3.39671		1.96938
12.3216	1.17839	-12.5101		2.00964						2.4285	-0.217473	3.42961		2.90148
15.2769	1.17916	-11.5946		6.41921						2.72038	-0.215837	3.37514		2.78798
17.9627	1.17828	-12.8052		8.35994						5.39555	-0.212834	3.41706		2.26871
13.8404	1.20245	-12.6948		3.94768						5.1351	-0.218142	3.37553		2.25535
15.9455	1.17535	-10.762		7.97961						6.6155	-0.213119	3.38803		1.97814
16.2718	1.177	-10.9043		8.2476						7.87531	-0.212612	3.3988		1.72441
17.3597	1.23986	-11.8568		9.66688						2.60811	-0.215791	3.45654		2.89373
13.5648	1.19466	-11.6079		4.59745						5.17504	-0.218339	3.34584		2.21593
12.8116	1.14715	-11.3418		3.35496						2.62265	-0.222359	3.45513		2.87196
12.699	1.2117	-11.7721		3.6154						5.38292	-0.215752	3.40056		2.23918
15.6188	1.16057	-12.115		6.01171						-1.43495	-0.211843	3.4801		3.78409
13.8351	1.20044	-10.0827		6.52561						5.86914	-0.219918	3.42126		2.13053
12.6266	1.22151	-12.0673		3.35621						4.62955	-0.217809	3.44332		2.43496
12.4317	1.20481	-9.9516		5.02621						1.93679	-0.218606	3.45048		3.02708
14.2619	1.19593	-12.2917		4.76453						4.94458	-0.21844	3.39883		2.31874
13.2522	1.14114	-11.9036		3.21911						4.45403	-0.220172	3.40472		2.42407
12.3911	1.23921	-11.9461		3.40913						0.228536	-0.217608	3.46536		3.41563
14.9757	1.2171	-12.582		5.6449						4.95123	-0.22394	3.45156		2.34278
18.2037	1.26464	-11.3435		11.6776						7.60744	-0.223815	3.39418		1.69152
15.2052	1.11408	-11.672		5.26785						6.22546	-0.220202	3.46194		2.09108
12.4615	1.22993	-9.91411		5.41266						3.63167	-0.212581	3.36927		2.59724
14.5226	1.22715	-12.1059		5.71548						7.5914	-0.222972	3.45169		1.75902
12.5699	1.23073	-12.493		2.97714						5.72854	-0.214303	3.43233		2.20469
11.0396	1.20226	-13.4947		-0.222214						5.72952	-0.216467	3.47221		2.23196
16.0603	1.17284	-12.4913		6.34489						2.95422	-0.208919	3.39736		2.78017
15.5763	1.21663	-12.6914		6.25922						5.52706	-0.218094	3.47315		2.26773
16.6934	1.23473	-11.4991		9.11267						2.01862	-0.220117	3.47018		3.02585
15.6536	1.23123	-10.4234		8.84984						5.02277	-0.218391	3.38911		2.29218
12.9365	1.211	-12.4901		3.17593						3.55044	-0.215645	3.45507		2.68944
13.6304	1.23011	-12.5097		4.25712						7.07138	-0.221372	3.43248		1.86707
16.2024	1.17775	-13.1107		5.97166						5.79898	-0.216918	3.42678		2.16887
11.8592	1.22115	-11.5401		2.94175						3.2424	-0.222581	3.47018		2.74848
13.1258	1.22007	-12.2375		3.77697						3.1154	-0.219894	3.48803		2.80298
11.0044	1.29428	-9.70716		4.53566						3.02647	-0.220564	3.40225		2.73472
10.965	1.25631	-12.8975		0.878024						6.63637	-0.221551	3.408		1.9377
17.8317	1.26043	-11.5234		10.9521						3.57165	-0.209285	3.44688		2.69939
9.67095	1.23925	-11.9316		0.0531419						2.45126	-0.223288	3.42826		2.88093
16.0406	1.20641	-10.7426		8.60897						2.7059	-0.208149	3.45816		2.89493
13.156	1.21457	-12.2921		3.6868						4.78374	-0.217924	3.41082		2.36833
11.9463	1.22743	-10.9228		3.74041						5.40683	-0.218221	3.43435		2.25446
13.3486	1.08675	-10.9134		3.59317						7.64302	-0.225442	3.53545		1.8124
13.7842	1.18618	-12.6022		3.74844						7.38234	-0.207772	3.40866		1.87481
14.0353	1.28122	-11.5711		6.41115						5.1815	-0.226317	3.48868		2.31603
13.5505	1.2146	-12.2494		4.209						6.7626	-0.21843	3.49266		2.0155
16.4212	1.13106	-9.62555		8.94779						8.09935	-0.217094	3.47		1.71168
15.8151	1.23677	-10.8761		8.68359						2.96571	-0.216189	3.38747		2.74632
17.0807	1.25186	-11.4723		9.91041						5.89727	-0.218261	3.38438		2.09724
15.0053	1.26648	-11.474		7.53002						9.73976	-0.221418	3.433		1.27644
14.1408	1.20602	-10.3776		6.67638						5.57267	-0.214792	3.35292		2.15596
15.5376	1.2172	-10.4627		8.44964						8.35034	-0.216475	3.44617		1.63853
12.5181	1.24025	-10.886		4.63951						5.43831	-0.222696	3.44203		2.23094
10.4743	1.27668	-12.3453		1.02705						4.25395	-0.226546	3.36589		2.40218
13.7237	1.24381	-11.3006		5.76901						7.15545	-0.210187	3.41749		1.91351
16.5718	1.26519	-11.3107		9.65577						8.03481	-0.216011	3.43356		1.69795
11.675	1.19505	-10.0402		3.91207						4.76227	-0.206897	3.40911		2.42381
17.055	1.13359	-12.6175		6.71587						4.57072	-0.21586	3.42027		2.43364
11.9341	1.18325	-11.9213		2.19979						10.0771	-0.2147	3.43447		1.27092
16.1628	1.24351	-11.852		8.2466						6.72611	-0.219376	3.39572		1.92017
14.8176	1.21904	-10.6201		7.44305						8.33825	-0.205219	3.42079		1.70962
14.2602	1.20321	-11.8235		5.33444						5.85586	-0.218834	3.43413		2.15266
14.2838	1.18546	-11.86		5.07287						8.18601	-0.22441	3.3845		1.54748
10.7914	1.21793	-9.83377		3.30935						7.46631	-0.216619	3.38965		1.77231
11.1537	1.26338	-11.0187		3.0726						5.84996	-0.210499	3.40246		2.17105
14.202	1.21303	-12.2028		5.02475						6.29955	-0.220574	3.44224		2.05272
14.4038	1.15645	-10.7534		5.90376						4.97519	-0.223487	3.42809		2.31621
12.0796	1.2158	-12.884		1.80238						1.09082	-0.218608	3.39419		3.15573
12.1183	1.23527	-12.7406		2.22887						5.77891	-0.222824	3.4434		2.15572
13.1294	1.23013	-11.8841		4.26673						8.49203	-0.218512	3.36067		1.50506
12.8265	1.22163	-10.785		4.88426						3.50445	-0.209166	3.38075		2.64773
11.8319	1.20674	-12.6161		1.66195						8.4184	-0.216543	3.42395		1.60101
12.607	1.24841	-10.9494		4.78929						6.66328	-0.227232	3.42617		1.91206
12.6605	1.22129	-10.89		4.57219						3.42316	-0.21869	3.42891		2.6803
14.4179	1.22991	-12.0812		5.65158						6.73327	-0.218116	3.47403		2.0054
16.6805	1.18951	-11.6254		8.21635						3.79703	-0.216786	3.40437		2.58123
13.1073	1.23146	-11.497		4.64407						2.8699	-0.213388	3.45861		2.8462
11.1536	1.21206	-11.9421		1.57678						4.0488	-0.2125	3.45465		2.59428
14.8492	1.19321	-11.6672		6.05095						5.53486	-0.207628	3.35444		2.20525
11.9471	1.2201	-12.8269		1.74976						6.49721	-0.217843	3.3647		1.94932
15.2823	1.19152	-12.3275		5.88152						9.95739	-0.213551	3.42563		1.29921
15.3354	1.20741	-11.2194		7.29668						4.69768	-0.208644	3.38501		2.40487
11.5739	1.19522	-12.4447		1.38864						9.47301	-0.206268	3.44922		1.49525
12.4962	1.22079	-12.1294		3.1259						6.80314	-0.222108	3.27243		1.7614
12.3521	1.23514	-11.7636		3.49309						4.15278	-0.209029	3.38999		2.52194
17.6723	1.15099	-11.2013		9.1393						5.90683	-0.210086	3.38076		2.13982
10.8069	1.23157	-12.0354		1.27404						3.22588	-0.206665	3.44603		2.77935
16.1407	1.18633	-10.7997		8.34852						1.8745	-0.208808	3.43042		3.03901
15.3475	1.20152	-10.5059		7.93444						5.70372	-0.216645	3.38812		2.15243
15.2915	1.21911	-11.0747		7.56723						6.61362	-0.221435	3.4037		1.93921
14.4407	1.23884	-11.9891		5.90055						4.32116	-0.217692	3.45328		2.5126
16.4399	1.12569	-11.1907		7.31555						10.7883	-0.214648	3.42343		1.10774
15.1503	1.2026	-11		7.21972						4.00135	-0.222067	3.40052		2.51196
12.3879	1.2333	-10.9596		4.31847						4.84178	-0.222179	3.35141		2.27567
14.4937	1.21274	-11.477		6.10022						0.729863	-0.214207	3.4292		3.27286
12.639	1.22006	-10.3094		5.1109						6.91728	-0.210582	3.31987		1.86321
14.0871	1.25476	-12.1995		5.47643						4.52981	-0.213895	3.44831		2.47941
13.5355	1.2084	-10.5507		5.80556						-0.35633	-0.223093	3.45687		3.53637
12.9047	1.2322	-11.2219		4.67915						6.86109	-0.220388	3.41225		1.90015
11.021	1.19044	-10.1657		2.95411						4.79471	-0.215212	3.44606		2.41419
13.0668	1.26149	-12.0682		4.4154						8.41089	-0.221854	3.41667		1.55068
13.9913	1.18963	-10.5884		6.05609						4.56288	-0.215958	3.47927		2.49388
12.7756	1.20274	-10.8434		4.52233						2.55452	-0.220456	3.36594		2.80278
12.2775	1.19092	-11.21		3.41159						5.12914	-0.232153	3.43177		2.24103
16.0148	1.19017	-10.6786		8.38176						10.4431	-0.213255	3.33362		1.10658
17.2158	1.22828	-11.0694		10.0765						7.58157	-0.204027	3.43262		1.88578
13.4208	1.15681	-11.4212		4.10406						5.89201	-0.214384	3.39934		2.13618
12.6131	1.17219	-11.8686		2.91637						2.7689	-0.209703	3.39875		2.8181
10.1048	1.16124	-11.0576		0.676541						1.94979	-0.229261	3.43792		2.99091
14.9498	1.18281	-11.8034		5.87949						5.70247	-0.218458	3.42057		2.17482
14.2412	1.19804	-13.5924		3.46911						-0.395177	-0.212796	3.39648		3.48057
14.2104	1.19428	-12.0569		4.91435						4.82871	-0.229614	3.38788		2.27914
16.013	1.18439	-11.5028		7.46277						3.31631	-0.215602	3.3932		2.6782
14.8154	1.18055	-11.7902		5.70016						3.61355	-0.223942	3.48509		2.67586
13.2194	1.25331	-12.1274		4.44065						7.99164	-0.222108	3.42325		1.64823
14.519	1.19901	-11.4035		6.00497						11.1195	-0.210777	3.42152		1.07779
12.1126	1.21337	-12.0294		2.66764						5.73378	-0.220011	3.37881		2.11732
14.9596	1.22513	-10.8482		7.47917						6.53044	-0.225679	3.45918		1.9854
14.1481	1.20304	-10.9946		6.02606						4.75469	-0.222414	3.44131		2.3838
14.9113	1.24601	-12.4058		6.17382						10.6954	-0.208094	3.32914		1.1035
14.5425	1.17638	-11.1986		5.90896						7.50747	-0.216936	3.41634		1.7877
14.2214	1.19415	-11.0318		5.95062						4.82622	-0.208682	3.36015		2.353
14.114	1.27708	-11.6823		6.34244						3.10115	-0.218113	3.42906		2.75266
15.0971	1.16538	-13.0815		4.51229						3.58527	-0.216458	3.38152		2.60546
17.3603	1.13342	-12.2994		7.37719						4.03834	-0.213297	3.3884		2.52703
12.9746	1.21034	-11.9782		3.72545						5.252	-0.220015	3.37511		2.21959
11.5943	1.24823	-12.1885		2.28381						4.93632	-0.215099	3.4433		2.3815
12.7046	1.20533	-12.0677		3.24552						8.4044	-0.207481	3.4496		1.70584
13.6438	1.22971	-12.9324		3.8456						3.85659	-0.213878	3.49432		2.66948
14.1972	1.16757	-11.19		5.38616						11.2041	-0.207661	3.42569		1.09904
14.7717	1.23592	-11.1868		7.06983						5.46259	-0.226649	3.42252		2.18443
12.1451	1.22315	-10.7802		4.07506						5.57188	-0.217527	3.39163		2.17959
16.661	1.15287	-12.7864		6.42156						1.54984	-0.223026	3.40407		3.05841
18.8498	1.21974	-10.16		12.8318						7.6133	-0.216372	3.44997		1.80267
13.3407	1.12572	-10.5519		4.46596						6.87076	-0.21979	3.49465		1.98452
14.9875	1.15459	-10.0842		7.22032						6.5047	-0.216631	3.41115		2.00203
13.2139	1.20048	-11.3362		4.52675						4.21638	-0.216854	3.44704		2.5327
14.9094	1.2451	-13.3583		5.2053						8.54654	-0.214338	3.42356		1.59171
14.3449	1.21805	-11.2342		6.23861						3.68562	-0.21399	3.39944		2.61076
15.0565	1.16923	-11.0177		6.58687						5.52964	-0.212104	3.39213		2.21928
13.3695	1.18547	-11.2353		4.6138						4.57956	-0.223108	3.45991		2.43818
13.7323	1.19506	-11.3306		5.08033						6.07259	-0.214867	3.48484		2.18004
13.6075	1.1742	-11.3892		4.58865						2.70445	-0.215802	3.3911		2.80747
14.682	1.19559	-12.1454		5.40825						7.0723	-0.213673	3.40175		1.89058
10.2685	1.2244	-11.6193		0.953471						9.66384	-0.226561	3.41708		1.22763
13.2262	1.2336	-11.6643		4.65162						4.0999	-0.218594	3.41525		2.51904
13.9199	1.15005	-11.4199		4.58876						5.1743	-0.219147	3.39423		2.2603
14.7941	1.19798	-10.7447		6.97826						3.48726	-0.224101	3.42335		2.64185
14.8237	1.21328	-11.1391		6.84621						2.4753	-0.218642	3.40571		2.8645
11.861	1.24565	-12.5791		2.19554						8.99733	-0.210615	3.468		1.57303
16.9191	1.2781	-12.8318		8.79265						8.81636	-0.217777	3.50031		1.5803
13.652	1.17208	-11.1441		4.85714						6.23114	-0.220898	3.39706		2.02061
14.0001	1.22626	-10.4525		6.71522						5.77575	-0.216144	3.43567		2.18727
14.9095	1.21824	-10.5657		7.59767						5.22119	-0.21971	3.37917		2.23202
14.9747	1.17449	-13.5139		4.07375						4.87418	-0.223067	3.35212		2.26486
13.2328	1.23024	-10.7454		5.53415						3.53264	-0.219377	3.45935		2.68437
12.0811	1.16941	-11.7723		2.35541						6.67677	-0.22143	3.51469		2.03625
12.6531	1.22306	-10.3351		5.14048						4.02328	-0.218252	3.46302		2.58493
12.254	1.19307	-14.0859		0.533993						4.69217	-0.218484	3.51252		2.48735
14.1644	1.20841	-10.9824		6.13405						1.13447	-0.209129	3.44603		3.20878
13.8248	1.16708	-12.6606		3.47402						6.8277	-0.215487	3.43779		1.9665
13.2639	1.24453	-12.3035		4.20381						6.48595	-0.210152	3.37129		2.00826
13.0569	1.16071	-9.72271		5.43259						5.2193	-0.21876	3.47043		2.32865
11.7408	1.18926	-11.1423		2.82056						5.27884	-0.224608	3.38029		2.19462
9.92203	1.26354	-10.5348		2.00211						8.77417	-0.227854	3.45406		1.45483
11.7943	1.24077	-10.6591		3.97488						9.13229	-0.218424	3.35697		1.36226
13.119	1.23787	-10.7269		5.5127						9.21341	-0.214775	3.48375		1.50494
13.4936	1.22351	-11.4256		5.0839						6.31905	-0.217054	3.38646		2.01488
15.0878	1.20117	-9.97342		8.14953						2.22389	-0.216124	3.43186		2.95122
11.7296	1.18116	-11.1511		2.7034						4.07688	-0.211722	3.39572		2.53256
18.1929	1.21507	-11.7165		10.3892						5.811	-0.218806	3.46119		2.18971
15.0757	1.14093	-12.9047		4.29563						3.64559	-0.218861	3.37783		2.57995
14.7691	1.24103	-11.4633		6.86561						5.87783	-0.219249	3.45612		2.16741
13.2849	1.31854	-11.6037		5.91301						4.36864	-0.220674	3.45349		2.48945
11.4136	1.2332	-10.3848		3.6904						5.97411	-0.214752	3.42062		2.13766
14.3368	1.25963	-12.8754		5.18358						0.625629	-0.219249	3.44848		3.31132
13.922	1.09951	-10.9154		4.39209						6.67625	-0.217794	3.37154		1.91749
11.8881	1.17367	-9.89034		4.06247						5.51335	-0.219475	3.37876		2.16871
12.1221	1.18226	-10.7054		3.62605						9.52527	-0.223495	3.45181		1.32296
16.5515	1.21476	-11.9866		8.11959						3.10909	-0.226694	3.38467		2.67985
13.0088	1.22695	-11.8607		4.10036						-0.325588	-0.215524	3.40203		3.4722
10.2687	1.27843	-12.7079		0.419972						9.15384	-0.227796	3.4131		1.32789
13.8162	1.23218	-10.4737		6.55032						4.62743	-0.216837	3.41215		2.40875
12.3834	1.24136	-11.639		3.73324						6.94664	-0.22224	3.34295		1.79913
13.8282	1.19313	-10.719		5.77987						6.21733	-0.224009	3.43039		2.03766
9.88525	1.21692	-12.2452		-0.215631						3.26282	-0.218844	3.43804		2.72399
13.9724	1.18653	-11.0617		5.51702						0.730336	-0.215812	3.43471		3.27709
17.0572	1.2303	-12.3718		8.61377						4.36534	-0.216007	3.41708		2.47413
16.5374	1.22076	-11.3674		8.8208						6.37691	-0.21593	3.38719		2.01022
12.201	1.24861	-11.6694		3.56503						6.45012	-0.212974	3.49973		2.12602
12.9973	1.23884	-12.6531		3.44834						2.3875	-0.216892	3.47749		2.95966
13.8597	1.18806	-11.7581		4.70803						9.16665	-0.221508	3.46793		1.43745
13.5503	1.19022	-11.6047		4.52316						3.33797	-0.210529	3.40477		2.70203
12.5051	1.26144	-10.8542		4.92028						4.84928	-0.207894	3.36495		2.35681
15.8228	1.24581	-11.9688		7.74354						3.14383	-0.220743	3.35624		2.66227
15.7536	1.20395	-11.1381		7.82847						6.38952	-0.212563	3.45956		2.10138
13.6647	1.21416	-11.902		4.68916						7.5176	-0.219254	3.37155		1.72328
14.5468	1.21374	-10.9518		6.70426						6.79942	-0.222876	3.40828		1.89286
15.5441	1.23145	-10.8157		8.32608						2.96708	-0.215026	3.37346		2.73546
15.7304	1.17331	-11.305		7.15176						4.63588	-0.228752	3.34521		2.28475
14.921	1.22721	-11.8121		6.49921						-0.522848	-0.214192	3.42214		3.53413
13.5144	1.2402	-10.6608		6.09968						4.78443	-0.215126	3.48022		2.45097
12.3485	1.23104	-10.0795		5.12199						9.25878	-0.222964	3.35776		1.29339
13.6914	1.20652	-14.3818		2.13714						2.16004	-0.227109	3.39212		2.90156
13.1546	1.12721	-12.45		2.37806						4.74078	-0.216188	3.45601		2.43111
14.1218	1.2175	-11.7415		5.45177						7.40161	-0.214805	3.4632		1.8733
17.5236	1.20046	-11.5257		9.51061						8.66306	-0.224615	3.31641		1.37056
15.3893	1.17384	-10.7806		7.28386						5.86011	-0.216582	3.45734		2.18815
18.1327	1.1841	-12.0883		9.38275						0.125502	-0.215569	3.45383		3.42677
15.5787	1.16727	-12.5269		5.6576						5.40285	-0.217551	3.36221		2.18681
15.3268	1.23959	-12.0379		6.96109						7.72908	-0.220622	3.33112		1.62591
15.7419	1.19123	-11.616		7.13625						5.7209	-0.224951	3.35559		2.06867
12.9024	1.14991	-12.0898		2.74688						5.0191	-0.218592	3.41983		2.3227
14.5653	1.25151	-12.2073		6.02131						0.0701524	-0.220996	3.38617		3.37066
13.2457	1.19859	-11.5026		4.37357						7.66083	-0.223833	3.3478		1.63305
16.2324	1.24623	-11.0389		9.19037						4.66563	-0.209196	3.39255		2.41652
9.04203	1.22605	-12.4465		-1.36049						7.47773	-0.209501	3.34704		1.78045
16.3961	1.20729	-10.5498		9.24512						5.33504	-0.214827	3.42392		2.27781
12.8814	1.23854	-10.659		5.29505						3.82458	-0.228258	3.40016		2.52717
11.6301	1.19443	-11.9355		1.95581						11.1136	-0.220897	3.47278		1.01781
12.0667	1.19917	-10.4499		4.02006						8.40672	-0.21259	3.36514		1.57796
18.0371	1.2176	-11.6433		10.3186						10.3332	-0.217641	3.36473		1.11581
15.1123	1.2726	-12.2547		6.9773						8.73508	-0.223507	3.30876		1.3564
15.4145	1.16629	-10.1366		7.84117						15.2306	-0.215447	3.37708		0.0956838
17.494	1.173	-11.9125		8.6079						9.40768	-0.221544	3.41053		1.32631
16.3313	1.19019	-11.7975		7.63998						2.64305	-0.215333	3.43693		2.86779
14.4737	1.20706	-10.4146		7.056						6.58143	-0.211458	3.44867		2.05698
15.3651	1.19156	-11.6271		6.68125						6.23587	-0.217146	3.35199		1.99789
16.9023	1.19655	-12.9372		7.28713						3.13054	-0.221192	3.44829		2.75584
13.2548	1.23996	-12.2219		4.21351						7.47387	-0.226262	3.35309		1.66204
16.2623	1.24607	-12.0967		8.16734						6.13933	-0.211681	3.4344		2.13483
16.1923	1.22135	-11.3639		8.41257						8.45025	-0.214552	3.41854		1.60552
15.435	1.21046	-9.96489		8.71857						3.73677	-0.220423	3.505		2.68133
13.1681	1.18368	-11.4446		4.14213						7.80745	-0.225173	3.40175		1.64372
18.3781	1.2491	-12.0215		10.9344						1.68875	-0.218083	3.4373		3.06902
12.9661	1.18474	-12.6486		2.71285						4.10287	-0.221045	3.40322		2.4963
15.6347	1.20451	-11.3402		7.49194						1.66967	-0.21868	3.4405		3.07538
13.389	1.21411	-11.0729		5.1828						5.45948	-0.221283	3.53469		2.3266
14.394	1.1581	-12.1281		4.54161						8.31837	-0.220991	3.41001		1.57173
17.3713	1.20438	-11.3953		9.52644						0.334126	-0.214726	3.47906		3.40731
15.2546	1.24865	-11.3912		7.65643						4.81182	-0.22186	3.45028		2.38273
13.9982	1.2377	-11.9429		5.3827						6.56445	-0.216417	3.47226		2.05161
16.4139	1.23349	-11.4838		8.76253						1.52924	-0.217241	3.40548		3.07326
14.9268	1.24028	-11.9611		6.55243						4.82618	-0.219709	3.44051		2.38016
18.2071	1.27124	-11.0942		12.0515						4.94669	-0.210054	3.37234		2.33327
14.7401	1.22382	-11.7128		6.32647						0.63782	-0.210006	3.35446		3.22052
12.8008	1.27456	-11.9008		4.41463						2.77218	-0.215351	3.39283		2.79584
11.7924	1.14952	-10.0836		3.47204						7.97917	-0.208452	3.41636		1.75309
12.3514	1.26025	-11.8115		3.75439						6.62658	-0.226569	3.3902		1.88882
13.8724	1.20593	-11.4523		5.27687						6.80696	-0.219247	3.45555		1.96314
13.9341	1.21524	-11.2323		5.70101						2.84166	-0.223451	3.49208		2.85711
14.2854	1.16145	-11.1595		5.43219						-1.59531	-0.21632	3.39506		3.74015
11.9462	1.24155	-12.6373		2.19455						3.87746	-0.210247	3.40541		2.59019
14.603	1.21911	-11.8527		5.94999						1.92038	-0.217602	3.39483		2.97696
13.7394	1.19526	-11.6067		4.81547						7.61949	-0.221363	3.42063		1.73396
16.1045	1.16612	-12.0024		6.77741						8.98679	-0.208943	3.43484		1.55711
11.9679	1.20982	-11.3162		3.16288						7.94532	-0.220055	3.48311		1.7347
11.1126	1.15791	-10.6079		2.25943						12.0712	-0.222056	3.41907		0.738602
14.3111	1.25827	-10.5272		7.47999						5.72845	-0.212111	3.397		2.18193
17.0763	1.23261	-10.9957		10.0527						6.42274	-0.214429	3.43081		2.05359
18.746	1.20667	-11.7801		10.8402						6.59951	-0.220815	3.44117		1.9839
14.9463	1.18305	-10.7264		6.95588						4.38839	-0.21654	3.46845		2.51819
10.8411	1.16457	-11.1224		1.50278						8.52662	-0.218095	3.42549		1.56588
14.3525	1.25107	-11.388		6.56804						7.89624	-0.216381	3.34122		1.63263
15.0399	1.20338	-12.4782		5.62053						3.28399	-0.217428	3.37677		2.66274
14.7834	1.25462	-12.6967		5.85082						2.44175	-0.215184	3.44118		2.91576
14.0815	1.16364	-11.3548		5.0311						-0.0749929	-0.211059	3.47574		3.49157
[truncated: 8,765 more rows]

## Sheet: YL-199
	Coefficients (from excel Data analysis)	Standard Error (from excel Data analysis)									Coefficients (from excel Data analysis)	Standard Error (from excel Data analysis)
[truncated: 10,006 more rows]

[truncated: 24 more sheets: YL-200, YL-207, YL-209, YL-211, YL-224, YL-236, YL-245, YL-246, YL-250, YL-252, YL-255, YL-258, YL-264, YL-267, YL-270, YL-273-19688, YL-273-19731, YL-287, YL-307, YL-314 …]
